# Supplementary material for: Predicting the Bioconcentration Factor in Fish from Molecular Structures
Source: MDPI journal article supplement (doi:10.3390/toxics10100581), 2022-09-30

**Supplementary material for the article:**

## **Predicting the Bioconcentration Factor in Fish from Molecular Structures**

Linda Bertato, Nicola Chirico and Ester Papa \*

**Figure S1 A** - ROC curve for the LDA model calculated for the training set

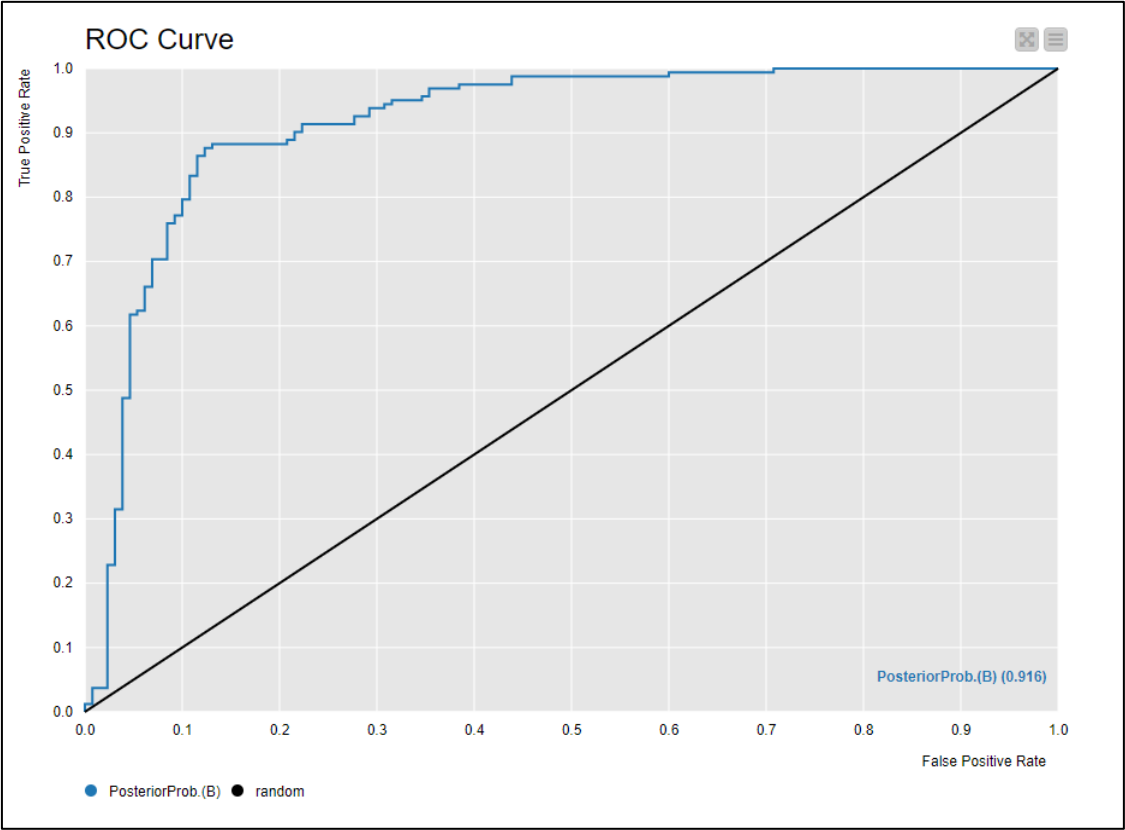

**Figure S1 B** – ROC curve for the LDA model calculated for the prediction set

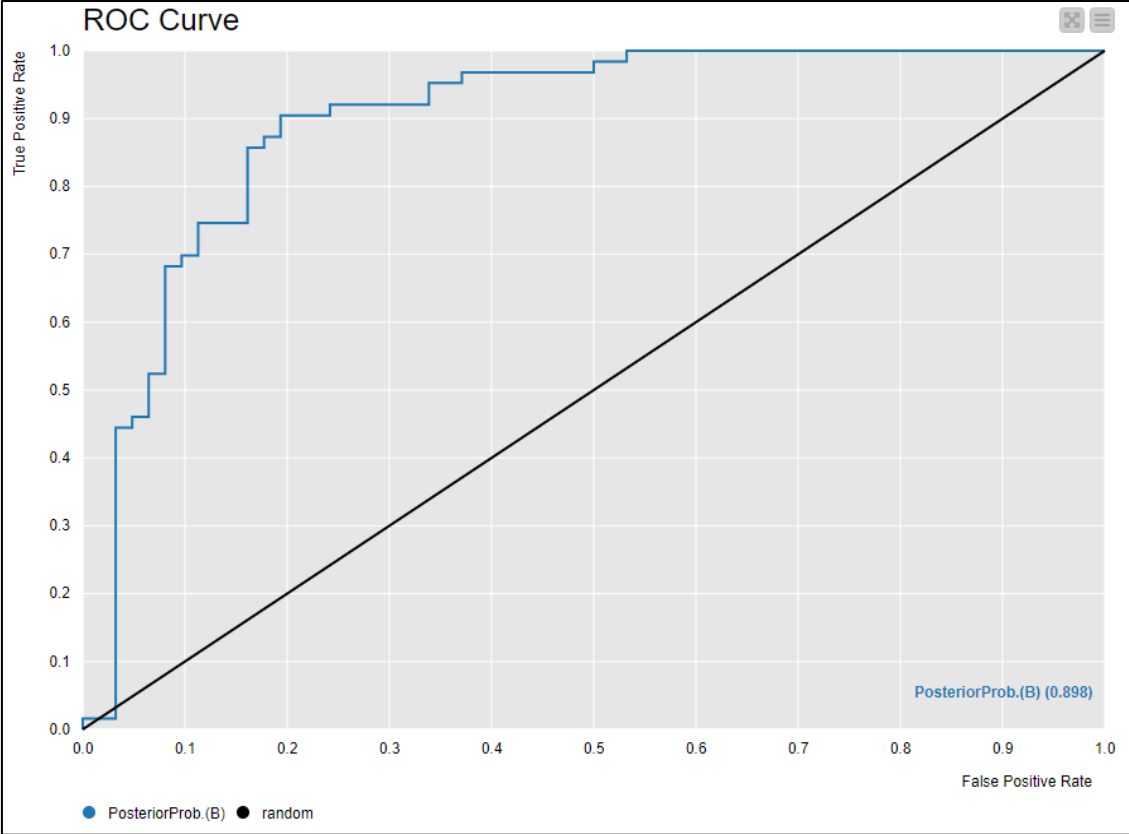

**Figure S1 C** - ROC curve for the LDA model calculated for the 5-folds cross validation

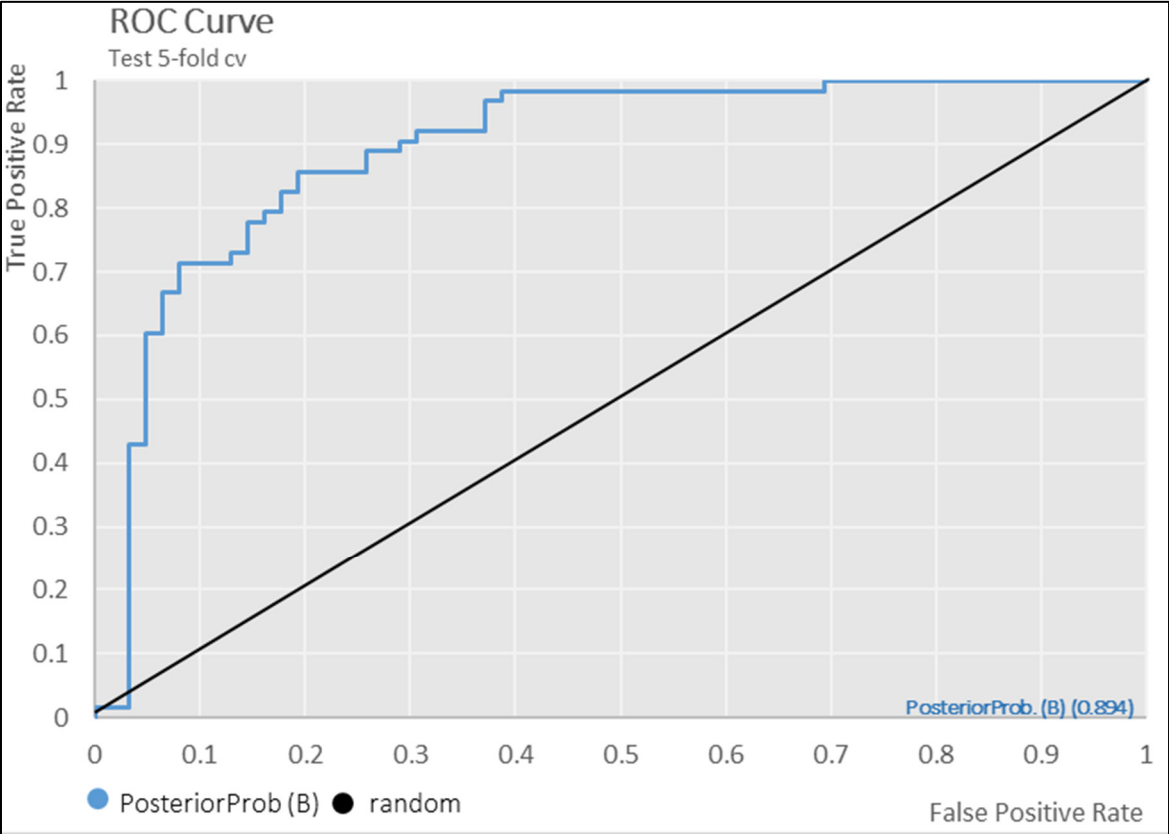

**Figure S2 A** - ROC curve for the ANN model calculated for the training set

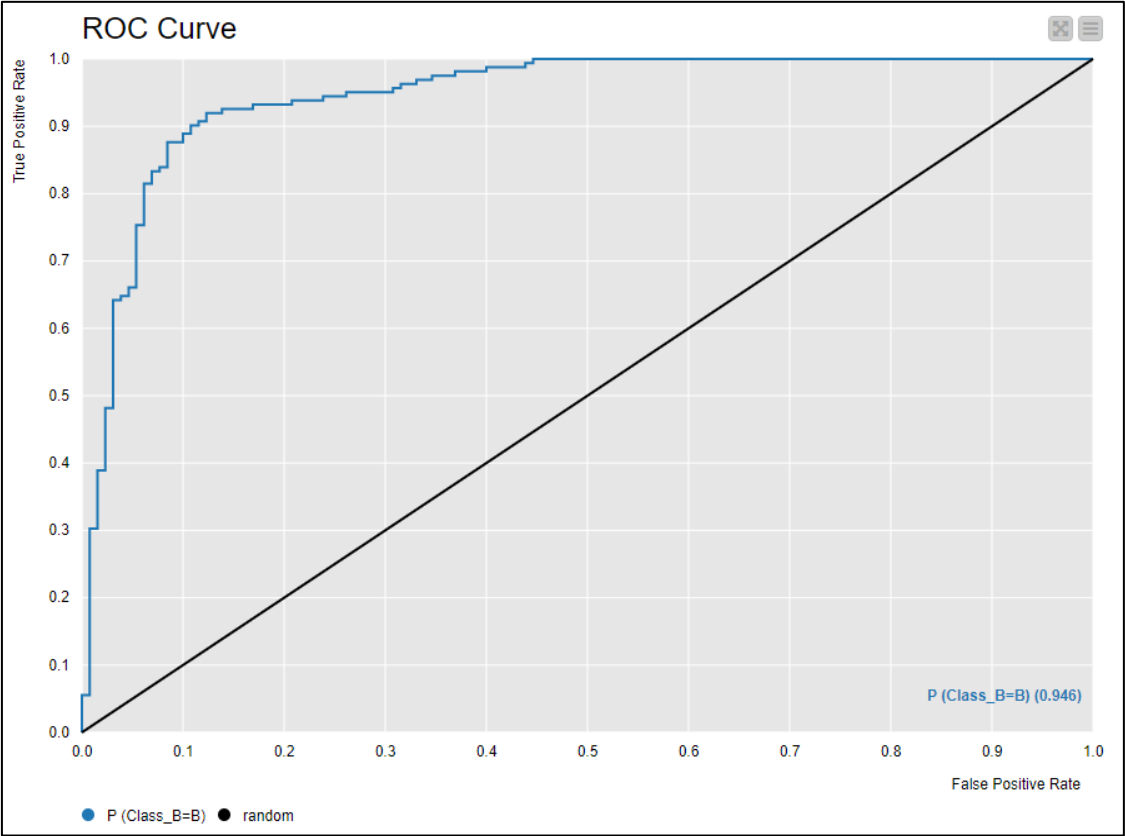

**Figure S2 B** – ROC curve for the LDA model calculated for the prediction set

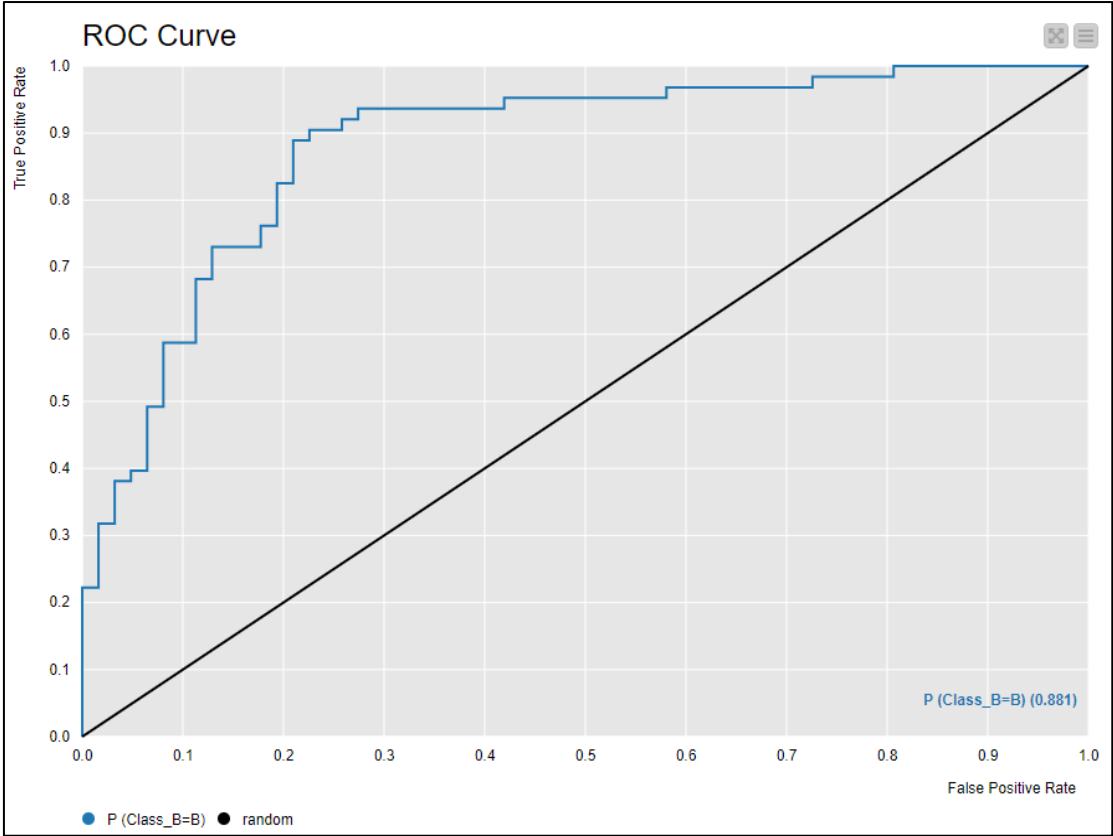

**Figure S2 C** - ROC curve for the LDA model calculated for the 5-folds cross validation

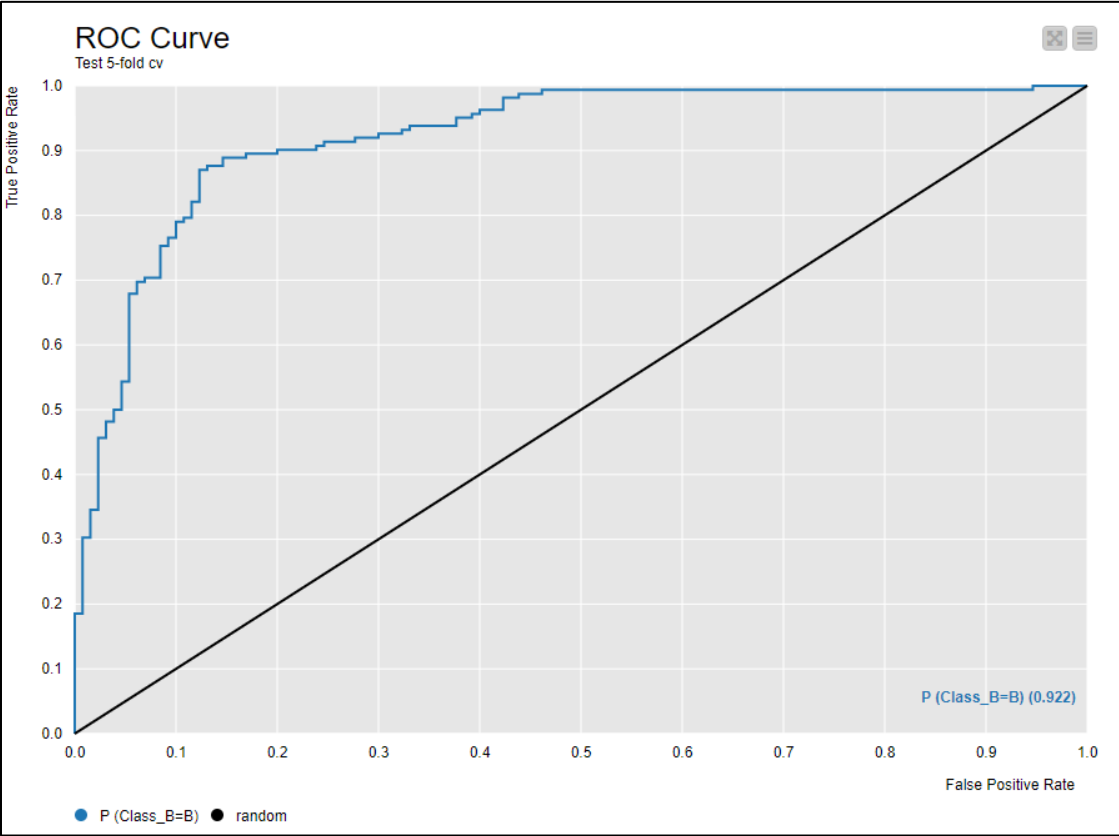

**Figure S3.** Box plots comparing the experimental range in the external prediction set composed of notB compounds and the distribution of the common errors in prediction among LDA and ANN models

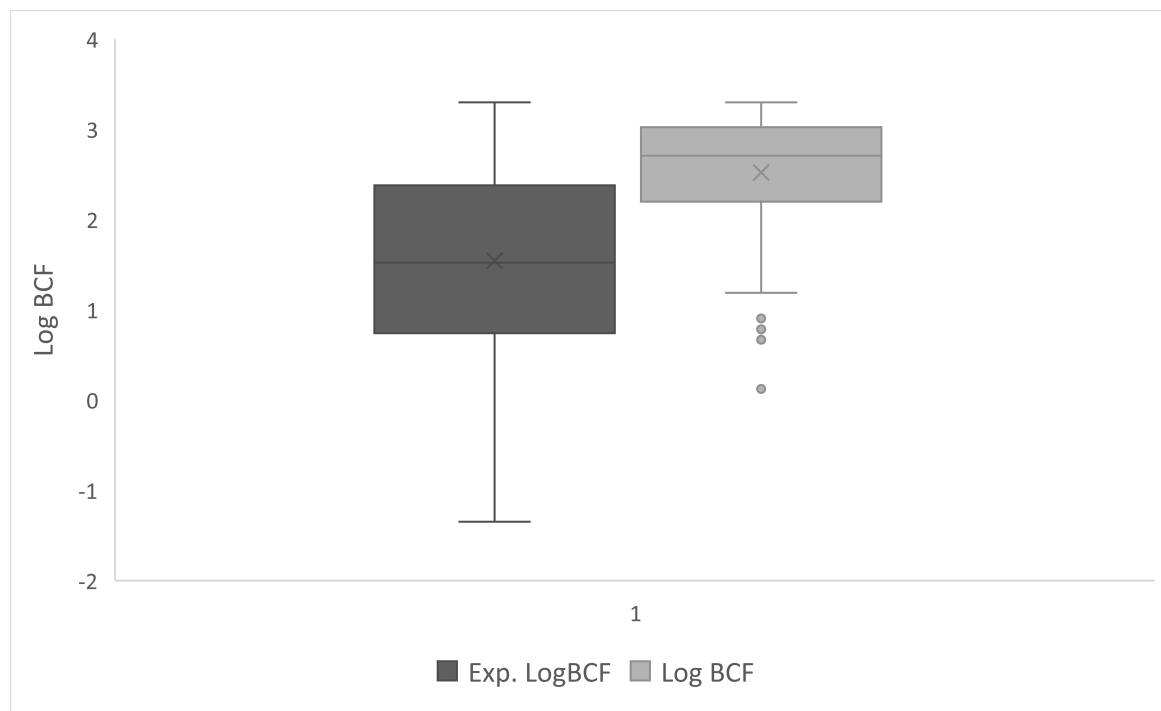

Supplement: s1 [file s1]
