# Supplementary material for: Predicting the Bioconcentration Factor in Fish from Molecular Structures
Source: Toxics. 2022 Sep 30;10(10):581. doi: 10.3390/toxics10100581 (PMC9610932; doi:10.3390/toxics10100581)
Supplement: Supplementary file 1 [file toxics-10-00581-s001.zip › Supplementary_Material_B.xlsx]

## Sheet: Table S1
Table S1. List of 11 data corresponding to wrong or uncertain SMILES. These log BCF value were excluded from further analysis
CAS	Exp. log BCF (L/kg bdwt)
0001322-93-6	0.6
0001934-21-0	0.48
0006842-15-5	3.25
0025154-52-3	2.19
0025638-17-9	0.18
0026545-58-4	1
0026898-17-9	4
0030171-80-3	1.11
0038640-62-9	3.27
0039227-28-6	4
0057055-39-7	2.18

## Sheet: Table S2
Table S2. List of 156 Inorganic chemicals, metalorganics, salts and ions excluded from the dataset.
CAS	SMILES
0000056-93-9	C[N+](Cc1ccccc1)(C)C
0000057-09-0	CCCCCCCCCCCCCCCC[N+](C)(C)C
0000068-19-9	OCC1OC(C(C1OP(=O)(OC(CNC(=O)CCC1(C)C2=NC(C1CC(=O)N)C1(C)N([Co+]C#N)C(=C(C)C3=NC(=CC4=NC(=C2C)C(CCC(=O)N)C4(C)C)C(C3(C)CC(=O)N)CCC(=O)N)C(C1(C)CC(=O)N)CCC(=O)N)C)O)O)n1cnc2c1cc(C)c(c2)C
0000081-88-9	CCN(c1ccc2c(c1)[o+]c1c(c2c2ccccc2C(=O)O)ccc(c1)N(CC)CC)CC
0000085-00-7	c1cc[n+]2c(c1)c1cccc[n+]1CC2
0000140-72-7	CCCCCCCCCCCCCCCC[n+]1ccccc1
0000569-64-2	CN(c1ccc(cc1)[C+](c1ccc(cc1)N(C)C)c1ccccc1)C
0001520-78-1	C[Pb+](C)C
0001694-09-3	CCN(c1ccc(cc1)[C+](c1ccc(cc1)N(Cc1cccc(c1)S(=O)(=O)O)CC)c1ccc(cc1)N(C)C)Cc1cccc(c1)S(=O)(=O)O
0001825-60-5	CCCCCCCCCC[n+]1cccc(c1)COCCCCOCc1ccc[n+](c1)CCCCCCCCCC
0001829-98-7	CCCCCCC(COCC(OS(=O)(=O)O)C[N+]1=Cc2c(CC1)cccc2)CCCC
0001847-51-9	CC[NH+](CCCNc1nc(Nc2ccc3c(c2)cc(c(c3O)N=Nc2ccc3c(c2)[nH]c(=O)[nH]3)S(=O)(=O)O)nc(n1)NCCC[NH+](CC)CC)CC
0001910-42-5	C[n+]1ccc(cc1)c1cc[n+](cc1)C
0001941-30-6	CCC[N+](CCC)(CCC)CCC
0002650-18-2	CCN(c1ccc(cc1)[C+](c1ccccc1S(=O)(=O)O)c1ccc(cc1)N(Cc1cccc(c1)S(=O)(=O)O)CC)Cc1cccc(c1)S(=O)(=O)O
0003251-23-8	[Cu+2]
0003520-42-1	CCN(c1cc2[o+]c3cc(N(CC)CC)c(cc3c(c2cc1C)c1ccc(cc1S(=O)(=O)O)S(=O)(=O)O)C)CC
0007173-51-5	CCCCCCCCCC[N+](CCCCCCCCCC)(C)C
0007446-18-6	[Tl+]
0007647-15-6	[Na+]
0007720-78-7	[Fe+2]
0007733-02-0	[Zn+2]
0007761-88-8	[Ag+]
0007786-81-4	[Ni+2]
0007787-56-6	[Be+2]
0010045-94-0	[Hg+2]
0010099-59-9	[La+3]
0010099-74-8	[Pb+2]
0010124-36-4	[Cd+2]
0010124-43-3	[Co+2]
0010168-81-7	[Gd+3]
0010325-94-7	[Cd+2]
0010361-93-0	[Y+3]
0011132-78-8	[Mn+2]
0012040-57-2	[Fe+3]
0012054-48-7	[Ni+2]
0013823-29-5	[Th+4]
0022967-92-6	C[Hg+]
0028300-74-5	[Sb+3]
0068424-85-1	CCCCCCCCCCCCCC[N+](Cc1ccccc1)(C)C
0088358-74-1	CCCCN(c1ccc(cc1)[N+](=C1C=CC(=[N+](c2ccc(cc2)N(CCCC)CCCC)c2ccc(cc2)N(CCCC)CCCC)C=C1)c1ccc(cc1)N(CCCC)CCCC)CCCC
0129211-47-8	C1CC[N+]2(C1)CCCC2
0307492-75-7	CCn1cc[n+](c1C)C
UNK-10	CCCC[Sn+2]CCCC
0001302-42-7	O=[Al-]=O
0007631-95-0	[O-][Mo](=O)(=O)[O-]
0013598-66-8	O=[Tc-](=O)(=O)=O
0085209-91-2	[O-]P1(=O)Oc2c(Cc3c(O1)c(cc(c3)C(C)(C)C)C(C)(C)C)cc(cc2C(C)(C)C)C(C)(C)C
0000056-35-9	CCCC[Sn](O[Sn](CCCC)(CCCC)CCCC)(CCCC)CCCC
0000062-38-4	CC(=O)O[Hg]c1ccccc1
0000075-15-0	S=C=S
0000075-60-5	C[As](=O)(O)C
0000076-87-9	O[Sn](c1ccccc1)(c1ccccc1)c1ccccc1
0000078-00-2	CC[Pb](CC)(CC)CC
0000107-51-7	C[Si](O[Si](C)(C)C)(O[Si](C)(C)C)C
0000115-09-3	C[Hg]Cl
0000133-06-2	ClC(SN1C(=O)C2C(C1=O)CC=CC2)(Cl)Cl
0000141-62-8	C[Si](O[Si](C)(C)C)(O[Si](O[Si](C)(C)C)(C)C)C
0000141-63-9	C[Si](O[Si](O[Si](C)(C)C)(C)C)(O[Si](O[Si](C)(C)C)(C)C)C
0000147-14-8	c1ccc2c(c1)C1=NC2=Nc2c3ccccc3c3n2[Cu]n2c(=N1)c1ccccc1c2=NC1=NC(=N3)c2c1cccc2
0000151-50-8	C#N
0000333-20-0	SC#N
0000379-52-2	F[Sn](c1ccccc1)(c1ccccc1)c1ccccc1
0000541-09-3	CC(=O)O[U](=O)(=O)OC(=O)C
0000556-67-2	C[Si]1(C)O[Si](C)(C)O[Si](O[Si](O1)(C)C)(C)C
0000593-57-7	C[As]C
0000595-90-4	c1ccc(cc1)[Sn](c1ccccc1)(c1ccccc1)c1ccccc1
0000639-58-7	Cl[Sn](c1ccccc1)(c1ccccc1)c1ccccc1
0000683-18-1	CCCC[Sn](CCCC)(Cl)Cl
0000791-31-1	O[Si](c1ccccc1)(c1ccccc1)c1ccccc1
0000818-08-6	CCCC[Sn](=O)CCCC
0000900-95-8	CC(=O)O[Sn](c1ccccc1)(c1ccccc1)c1ccccc1
0000919-30-2	NCCC[Si](OCC)(OCC)OCC
0000994-31-0	CC[Sn](CC)(CC)Cl
0001066-45-1	C[Sn](Cl)(C)C
0001067-14-7	CC[Pb](CC)(CC)Cl
0001067-97-6	CCCC[Sn](CCCC)(CCCC)O
0001303-28-2	O=[As](=O)O[As](=O)=O
0001306-19-0	O=[Cd]
0001309-38-2	O=[Fe]O[Fe]O[Fe]=O
0001313-27-5	O=[Mo](=O)=O
0001313-82-2	S
0001313-99-1	O=[Ni]
0001314-13-2	O=[Zn]
0001314-41-6	[Pb]1O[Pb]2O[Pb](O1)O2
0001314-62-1	O=[V](=O)O[V](=O)=O
0001314-98-3	S=[Zn]
0001317-36-8	O=[Pb]
0001327-53-3	O1[As]2O[As]3O[As]1O[As](O2)O3
0001328-53-6	Clc1c2C3N=C4N=C(c5c4c(Cl)c(c(c5Cl)Cl)Cl)N=c4n5[Cu]N3C(=NC3N=C(N=c5c5c4c(Cl)c(c(c5Cl)Cl)Cl)c4c3c(Cl)cc(c4Cl)Cl)c2c(c(c1Cl)Cl)Cl
0001333-82-0	O=[Cr](=O)=O
0001461-22-9	CCCC[Sn](CCCC)(CCCC)Cl
0001461-25-2	CCCC[Sn](CCCC)(CCCC)CCCC
0001464-42-2	C[Se]CCC(C(=O)O)N
0002163-80-6	C[As](=O)(O)O
0002279-76-7	CCC[Sn](CCC)(CCC)Cl
0002530-85-0	CO[Si](CCCOC(=O)C(=C)C)(OC)OC
0002943-75-1	CCCCCCCC[Si](OCC)(OCC)OCC
0003644-38-0	CCCC[Sn](Oc1c(Cl)c(Cl)c(c(c1Cl)Cl)Cl)(CCCC)CCCC
0007429-90-5	[Al]
0007439-89-6	[Fe]
0007439-92-1	[Pb]
0007439-96-5	[Mn]
0007439-97-6	[Hg]
0007439-98-7	[Mo]
0007440-02-0	[Ni]
0007440-22-4	[Ag]
0007440-24-6	[Sr]
0007440-36-0	[Sb]
0007440-43-9	[Cd]
0007440-46-2	[Cs]
0007440-47-3	[Cr]
0007440-48-4	[Co]
0007440-50-8	[Cu]
0007440-66-6	[Zn]
0007487-94-7	Cl[Hg]Cl
0007550-35-8	[Li]Br
0007601-89-0	O[Cl](=O)(=O)=O
0007646-79-9	Cl[Co]Cl
0007646-85-7	Cl[Zn]Cl
0007647-17-8	Cl[Cs]
0007681-49-4	F
0007718-54-9	Cl[Ni]Cl
0007722-64-7	O[Mn](=O)(=O)=O
0007727-18-6	Cl[V](=O)(Cl)Cl
0007778-43-0	O[As](=O)(O)O
0007782-49-2	[Se]
0007783-90-6	Cl[Ag]
0007787-47-5	Cl[Be]Cl
0007789-00-6	O[Cr](=O)(=O)O
0007790-86-5	Cl[Ce](Cl)Cl
0010025-82-8	Cl[In](Cl)Cl
0010043-35-3	OB(O)O
0010102-06-4	O=N(=O)O[U](=O)(=O)ON(=O)=O
0010102-18-8	O[Se](=O)O
0010108-64-2	Cl[Cd]Cl
0010108-73-3	O=N(=O)O[Ce](ON(=O)=O)ON(=O)=O
0010112-91-1	Cl[Hg][Hg]Cl
0010361-37-2	Cl[Ba]Cl
0010361-82-7	Cl[Sm](Cl)Cl
0010476-85-4	Cl[Sr]Cl
0010588-01-9	O[Cr](=O)(=O)O[Cr](=O)(=O)O
0011138-49-1	O[Al]=O
0012035-72-2	[Ni][Ni][Ni]=S=S
0012612-50-9	S=[Mo]=S
0013410-01-0	O[Se](=O)(=O)O
0013463-41-7	O=n1ccccc1S[Zn]Sc1ccccn1=O
0013463-67-7	O=[Ti]=O
0013939-25-8	OP(=O)(OP(=O)(O)O)OP(=O)(O)O
0016812-54-7	S=[Ni]
0017928-28-8	C[Si](O[Si](C)(C)C)(O[Si](C)(C)C)O[Si](C)(C)C
0018868-43-4	O=[Mo]=O
0020667-12-3	[Ag]O[Ag]
0021908-53-2	O=[Hg]
0060782-58-3	CCCCCC[Si](CCCCCC)(CCCCCC)O
1052075-57-6	CCCC[Si](O[Si](O[Si](O[Si](O[Si](CCCOCCOC(=O)C(=C)C)(C)C)(C)C)(C)C)(C)C)(C)C

## Sheet: Table S3
Table S3. List of 1395 chemicals included in the full dataset. The table reports CAS number and SMILES as identifiers, averaged experimental log BCF values and a priori classes used to perform classification.
CAS	SMILES_CAN	log BCF (L/kg bdwt)	a priori class
0000002-35-5	N#Cc1cc(Cl)ccc1OP(=S)(OC)OC	2.33	notB
0000006-60-7	OC(=O)c1nc(Cl)c(c(c1Cl)N)Cl	-1.7	notB
0000012-51-0	Oc1ccc(cc1)C1CC(C)(CCC1C(C)C)c1ccc(cc1)O	2.12	notB
0000013-24-1	O=C(C(O)(C)C)c1ccc(cc1)Cc1ccc(cc1)C(=O)C(O)(C)C	1.3	notB
0000017-62-4	COc1ccc(c(c1)S(=O)(=O)O)N=Nc1c(O)c2ccc(c(c2cc1S(=O)(=O)O)S(=O)(=O)O)N=Nc1c(cc2c(c1N)c(O)c(c(c2)S(=O)(=O)O)N=Nc1ccc2c(c1)cc(c(c2O)N=Nc1ccccc1S(=O)(=O)O)S(=O)(=O)O)S(=O)(=O)O	0.48	notB
0000017-98-9	OS(=O)(=O)c1cc2c(c(c1N=Nc1cc(C)c(cc1OCCCS(=O)(=O)O)N=Nc1cc(cc3c1c(O)cc(c3)S(=O)(=O)O)S(=O)(=O)O)O)ccc(c2S(=O)(=O)O)N=Nc1c(ccc2c1cc(c(c2O)N=Nc1ccc2c(c1)cc(c(c2O)N=Nc1ccccc1S(=O)(=O)O)S(=O)(=O)O)S(=O)(=O)O)Nc1ccccc1	1.59	notB
0000018-35-4	CC(=C)C1CC2CC1C=C2	2.98	notB
0000020-18-0	CCCCc1ccc(cc1)c1ccc(c(c1)F)c1cc(F)c(c(c1)F)C(Oc1cc(F)c(c(c1)F)F)(F)F	1.41	notB
0000047-09-5	OC(=O)C1CC=CCC1C(=O)N	0.54	notB
0000050-04-4	CC(=O)OCC(=O)C1(O)CCC2C1(C)CC(=O)C1C2CCC2=CC(=O)CCC12C	1.3	notB
0000050-06-6	CCC1(C(=O)NC(=O)NC1=O)c1ccccc1	0.7	notB
0000050-28-2	Oc1ccc2c(c1)CCC1C2CCC2(C1CCC2O)C	0.706667	notB
0000050-29-3	ClC(C(c1ccc(cc1)Cl)c1ccc(cc1)Cl)(Cl)Cl	3.64813	B
0000050-30-6	OC(=O)c1c(Cl)cccc1Cl	0.491482	notB
0000050-31-7	Clc1ccc(c(c1Cl)C(=O)O)Cl	0.588333	notB
0000050-32-8	c1ccc2c(c1)c1ccc3c4c1c(c2)ccc4ccc3	2.5418	notB
0000050-65-7	Clc1ccc(c(c1)C(=O)Nc1ccc(cc1Cl)N(=O)=O)O	2.4	notB
0000051-28-5	O=N(=O)c1ccc(c(c1)N(=O)=O)O	0.652339	notB
0000051-44-5	OC(=O)c1ccc(c(c1)Cl)Cl	0.581429	notB
0000051-52-5	CCCc1cc(=O)[nH]c(=S)[nH]1	1.09	notB
0000051-79-6	CCOC(=O)N	0.36	notB
0000052-68-6	COP(=O)(C(C(Cl)(Cl)Cl)O)OC	-1.27643	notB
0000053-70-3	c1ccc2c(c1)c1cc3ccc4c(c3cc1cc2)cccc4	2.8	notB
0000055-38-9	CSc1ccc(cc1C)OP(=S)(OC)OC	2.2348	notB
0000055-63-0	O=N(=O)OC(CON(=O)=O)CON(=O)=O	0.97	notB
0000056-23-5	ClC(Cl)(Cl)Cl	1.16041	notB
0000056-38-2	CCOP(=S)(Oc1ccc(cc1)N(=O)=O)OCC	2.2344	notB
0000056-49-5	Cc1ccc2c3c1CCc3c1c(c2)c2ccccc2cc1	3.17	notB
0000056-55-3	c1ccc2c(c1)cc1c(c2)ccc2c1cccc2	2.8725	notB
0000057-10-3	CCCCCCCCCCCCCCCC(=O)O	2.85	notB
0000057-15-8	CC(C(Cl)(Cl)Cl)(O)C	0.276902	notB
0000057-41-0	O=C1NC(=O)NC1(c1ccccc1)c1ccccc1	0.54	notB
0000057-63-6	C#CC1(O)CCC2C1(C)CCC1C2CCc2c1ccc(c2)O	2.29364	notB
0000057-97-6	Cc1c2ccc3c(c2c(c2c1cccc2)C)cccc3	2.91	notB
0000058-73-1	CN(CCOC(c1ccccc1)c1ccccc1)C	1.25667	notB
0000058-90-2	Oc1c(Cl)cc(c(c1Cl)Cl)Cl	2.062	notB
0000059-50-7	Oc1ccc(c(c1)C)Cl	0.985949	notB
0000060-00-4	OC(=O)CN(CC(=O)O)CCN(CC(=O)O)CC(=O)O	0.345	notB
0000060-09-3	Nc1ccc(cc1)N=Nc1ccccc1	1.565	notB
0000060-29-7	CCOCC	0.519091	notB
0000060-51-5	CNC(=O)CSP(=S)(OC)OC	0.768378	notB
0000060-57-1	ClC1=C(Cl)C2(C(C1(Cl)C1C2C2CC1C1C2O1)(Cl)Cl)Cl	3.48753	B
0000061-82-5	Nc1nnc[nH]1	0.0683333	notB
0000062-44-2	CCOc1ccc(cc1)NC(=O)C	1.08	notB
0000062-53-3	Nc1ccccc1	0.431723	notB
0000062-56-6	NC(=S)N	-0.1	notB
0000062-73-7	COP(=O)(OC=C(Cl)Cl)OC	-0.246206	notB
0000063-25-2	CNC(=O)Oc1cccc2c1cccc2	1.18675	notB
0000065-85-0	OC(=O)c1ccccc1	0.92	notB
0000066-81-9	CC1CC(C)C(=O)C(C1)C(CC1CC(=O)NC(=O)C1)O	0.734286	notB
0000067-66-3	ClC(Cl)Cl	0.827444	notB
0000067-68-5	CS(=O)C	0.183333	notB
0000067-72-1	ClC(C(Cl)(Cl)Cl)(Cl)Cl	2.41019	notB
0000068-12-2	O=CN(C)C	-0.1081	notB
0000068-22-4	C#CC1(O)CCC2C1(C)CCC1C2CCC2=CC(=O)CCC12	1.42	notB
0000070-30-4	Clc1cc(Cl)c(c(c1O)Cc1c(O)c(Cl)cc(c1Cl)Cl)Cl	2.16595	notB
0000071-36-3	CCCCO	-0.4	notB
0000071-43-2	c1ccccc1	1.50832	notB
0000071-55-6	CC(Cl)(Cl)Cl	0.593232	notB
0000072-43-5	COc1ccc(cc1)C(C(Cl)(Cl)Cl)c1ccc(cc1)OC	2.92294	notB
0000072-54-8	ClC(C(c1ccc(cc1)Cl)c1ccc(cc1)Cl)Cl	4.48	B
0000072-55-9	ClC(=C(c1ccc(cc1)Cl)c1ccc(cc1)Cl)Cl	3.14417	notB
0000074-11-3	OC(=O)c1ccc(cc1)Cl	1.06	notB
0000074-31-7	c1ccc(cc1)Nc1ccc(cc1)Nc1ccccc1	3.12942	notB
0000074-97-5	ClCBr	0.458464	notB
0000075-09-2	ClCCl	1.15149	notB
0000075-25-2	BrC(Br)Br	1.08289	notB
0000075-35-4	ClC(=C)Cl	0.956485	notB
0000075-64-9	CC(N)(C)C	0.655	notB
0000075-65-0	CC(O)(C)C	0.311667	notB
0000075-69-4	FC(Cl)(Cl)Cl	1.32	notB
0000075-71-8	FC(Cl)(Cl)F	0.862809	notB
0000075-91-2	OOC(C)(C)C	0.58	notB
0000075-98-9	OC(=O)C(C)(C)C	0.173665	notB
0000076-01-7	ClC(C(Cl)(Cl)Cl)Cl	1.8125	notB
0000076-12-0	FC(C(Cl)(Cl)F)(Cl)Cl	1.71764	notB
0000076-13-1	FC(C(Cl)(F)F)(Cl)Cl	1.63481	notB
0000076-14-2	FC(C(Cl)(F)F)(Cl)F	1.49	notB
0000076-44-8	ClC1C=CC2C1C1(Cl)C(=C(C2(C1(Cl)Cl)Cl)Cl)Cl	3.50358	B
0000076-83-5	ClC(c1ccccc1)(c1ccccc1)c1ccccc1	2.61405	notB
0000076-93-7	OC(=O)C(c1ccccc1)(c1ccccc1)O	-0.124	notB
0000077-47-4	ClC1=C(Cl)C(C(=C1Cl)Cl)(Cl)Cl	2.1807	notB
0000077-73-6	C1=CC2C(C1)C1C=CC2C1	2.23872	notB
0000077-99-6	CCC(CO)(CO)CO	0.81	notB
0000078-32-0	Cc1ccc(cc1)OP(=O)(Oc1ccc(cc1)C)Oc1ccc(cc1)C	3.16733	notB
0000078-40-0	CCOP(=O)(OCC)OCC	-0.0280979	notB
0000078-42-2	CCCCC(COP(=O)(OCC(CCCC)CC)OCC(CCCC)CC)CC	1.08038	notB
0000078-48-8	CCCCSP(=O)(SCCCC)SCCCC	3.13727	notB
0000078-51-3	CCCCOCCOP(=O)(OCCOCCCC)OCCOCCCC	0.639813	notB
0000078-59-1	CC1=CC(=O)CC(C1)(C)C	0.562378	notB
0000078-63-7	CC(OOC(C)(C)C)(CCC(OOC(C)(C)C)(C)C)C	3.61	B
0000078-79-5	C=CC(=C)C	1.14063	notB
0000078-87-5	ClCC(Cl)C	0.614254	notB
0000079-00-5	ClCC(Cl)Cl	0.575591	notB
0000079-01-6	ClC=C(Cl)Cl	1.07251	notB
0000079-06-1	NC(=O)C=C	0.09	notB
0000079-19-6	NNC(=S)N	1.105	notB
0000079-27-6	BrC(C(Br)Br)Br	0.749932	notB
0000079-34-5	ClC(C(Cl)Cl)Cl	0.993468	notB
0000079-46-9	CC(N(=O)=O)C	0.601221	notB
0000079-57-2	CN(C1C(=O)C(C(=O)N)C(=O)C2(C1C(O)C1C(=C2O)C(=O)c2c(C1(C)O)cccc2O)O)C	-0.43	notB
0000079-92-5	C=C1C2CCC(C1(C)C)C2	2.96206	notB
0000079-94-7	CC(c1cc(Br)c(c(c1)Br)O)(c1cc(Br)c(c(c1)Br)O)C	2.46984	notB
0000080-05-7	CC(c1ccc(cc1)O)(c1ccc(cc1)O)C	1.13953	notB
0000080-07-9	Clc1ccc(cc1)S(=O)(=O)c1ccc(cc1)Cl	1.96	notB
0000080-09-1	Oc1ccc(cc1)S(=O)(=O)c1ccc(cc1)O	-0.18	notB
0000080-43-3	CC(c1ccccc1)(OOC(c1ccccc1)(C)C)C	2.79539	notB
0000080-51-3	NNS(=O)(=O)c1ccc(cc1)Oc1ccc(cc1)S(=O)(=O)NN	-0.02	notB
0000081-14-1	O=N(=O)c1c(C)c(C(=O)C)c(c(c1C(C)(C)C)N(=O)=O)C	3.09	notB
0000081-15-2	O=N(=O)c1c(C)c(N(=O)=O)c(c(c1C(C)(C)C)N(=O)=O)C	3.67299	B
0000081-16-3	Nc1ccc2c(c1S(=O)(=O)O)cccc2	0.38	notB
0000082-05-3	O=C1c2ccccc2c2c3c1cccc3ccc2	1.88629	notB
0000082-44-0	Clc1cccc2c1C(=O)c1ccccc1C2=O	2.22325	notB
0000082-45-1	Nc1cccc2c1C(=O)c1ccccc1C2=O	2.06128	notB
0000082-68-8	Clc1c(Cl)c(N(=O)=O)c(c(c1Cl)Cl)Cl	2.08659	notB
0000083-32-9	c1cc2cccc3c2c(c1)CC3	2.80501	notB
0000083-42-1	O=N(=O)c1cccc(c1C)Cl	1.99	notB
0000083-79-4	COc1cc2c(cc1OC)OCC1C2C(=O)c2c(O1)c1CC(Oc1cc2)C(=C)C	1.34667	notB
0000084-15-1	c1ccc(cc1)c1ccccc1c1ccccc1	3.20251	notB
0000084-47-9	O=C1c2cc(ccc2C(=O)c2c1cccc2)C(C)(C)C	2.48	notB
0000084-51-5	CCc1ccc2c(c1)C(=O)c1c(C2=O)cccc1	1.90146	notB
0000084-57-1	Clc1cc(c(cc1n1[nH]c(cc1=O)C)Cl)S(=O)(=O)O	1.05	notB
0000084-65-1	O=C1c2ccccc2C(=O)c2c1cccc2	2	notB
0000084-66-2	CCOC(=O)c1ccccc1C(=O)OCC	2.07	notB
0000084-74-2	CCCCOC(=O)c1ccccc1C(=O)OCCCC	2.47869	notB
0000084-75-3	CCCCCCOC(=O)c1ccccc1C(=O)OCCCCCC	3.24	notB
0000085-01-8	c1ccc2c(c1)c1ccccc1cc2	3.32889	B
0000085-22-3	CCc1c(Br)c(Br)c(c(c1Br)Br)Br	2.17512	notB
0000085-41-6	O=C1NC(=O)c2c1cccc2	1.135	notB
0000085-68-7	CCCCOC(=O)c1ccccc1C(=O)OCc1ccccc1	1.62739	notB
0000085-83-6	Cc1cc(ccc1NN=C1C(=O)C=Cc2c1cccc2)N=Nc1ccccc1C	0.75	notB
0000086-30-6	O=NN(c1ccccc1)c1ccccc1	1.67829	notB
0000086-50-0	COP(=S)(SCn1nnc2c(c1=O)cccc2)OC	1.788	notB
0000086-73-7	c1ccc2c(c1)Cc1c2cccc1	2.80133	notB
0000086-74-8	c1ccc2c(c1)[nH]c1c2cccc1	2.28701	notB
0000086-87-3	OC(=O)Cc1cccc2c1cccc2	0.167617	notB
0000087-02-5	Nc1ccc2c(c1)cc(cc2O)S(=O)(=O)O	0.145714	notB
0000087-40-1	COc1c(Cl)cc(cc1Cl)Cl	2.85404	notB
0000087-62-7	Cc1cccc(c1N)C	0.45	notB
0000087-65-0	Clc1cccc(c1O)Cl	1.2981	notB
0000087-68-3	ClC(=C(Cl)Cl)C(=C(Cl)Cl)Cl	2.61911	notB
0000087-82-1	Brc1c(Br)c(Br)c(c(c1Br)Br)Br	3.07978	notB
0000087-83-2	Brc1c(C)c(Br)c(c(c1Br)Br)Br	2.61975	notB
0000087-84-3	BrC1C(Cl)C(Br)C(C(C1Br)Br)Br	2.52542	notB
0000088-06-2	Clc1cc(Cl)c(c(c1)Cl)O	2.47889	notB
0000088-18-6	Oc1ccccc1C(C)(C)C	1.94	notB
0000088-19-7	Cc1ccccc1S(=O)(=O)N	0.160129	notB
0000088-26-6	OCc1cc(c(c(c1)C(C)(C)C)O)C(C)(C)C	1.515	notB
0000088-30-2	Oc1ccc(c(c1)C(F)(F)F)N(=O)=O	1.1	notB
0000088-44-8	Cc1ccc(c(c1)S(=O)(=O)O)N	0.2	notB
0000088-60-8	Cc1ccc(c(c1)O)C(C)(C)C	1.965	notB
0000088-72-2	O=N(=O)c1ccccc1C	1.32501	notB
0000088-73-3	O=N(=O)c1ccccc1Cl	1.96281	notB
0000088-74-4	O=N(=O)c1ccccc1N	0.822256	notB
0000088-75-5	O=N(=O)c1ccccc1O	1.10726	notB
0000088-85-7	CCC(c1cc(cc(c1O)N(=O)=O)N(=O)=O)C	0.983485	notB
0000088-89-1	O=N(=O)c1cc(N(=O)=O)c(c(c1)N(=O)=O)O	0.125556	notB
0000088-98-2	OC(=O)C1CC=CCC1C(=O)O	0.32	notB
0000089-59-8	Clc1ccc(c(c1)N(=O)=O)C	1.92	notB
0000089-61-2	Clc1ccc(c(c1)N(=O)=O)Cl	1.66778	notB
0000089-63-4	Clc1ccc(c(c1)N(=O)=O)N	1.05235	notB
0000089-69-0	Clc1cc(N(=O)=O)c(cc1Cl)Cl	1.73805	notB
0000089-72-5	CCC(c1ccccc1O)C	1.49	notB
0000089-83-8	Cc1ccc(c(c1)O)C(C)C	1.48	notB
0000089-93-0	NCc1ccccc1C	0.956657	notB
0000090-12-0	Cc1cccc2c1cccc2	2.544	notB
0000090-13-1	Clc1cccc2c1cccc2	2.63	notB
0000090-30-2	c1ccc(cc1)Nc1cccc2c1cccc2	3.29177	notB
0000090-41-5	Nc1ccccc1c1ccccc1	1.55145	notB
0000090-51-7	Nc1ccc2c(c1)c(O)cc(c2)S(=O)(=O)O	0.207762	notB
0000090-94-8	CN(c1ccc(cc1)C(=O)c1ccc(cc1)N(C)C)C	1.55698	notB
0000091-15-6	N#Cc1ccccc1C#N	0.385367	notB
0000091-20-3	c1ccc2c(c1)cccc2	2.05883	notB
0000091-22-5	c1ccc2c(c1)nccc2	0.69994	notB
0000091-23-6	COc1ccccc1N(=O)=O	0.76626	notB
0000091-53-2	CCOc1ccc2c(c1)C(=CC(N2)(C)C)C	1.84	notB
0000091-57-6	Cc1ccc2c(c1)cccc2	3.19057	notB
0000091-58-7	Clc1ccc2c(c1)cccc2	3.63	B
0000091-63-4	Cc1ccc2c(n1)cccc2	0.48	notB
0000091-64-5	O=c1ccc2c(o1)cccc2	1.31	notB
0000091-66-7	CCN(c1ccccc1)CC	2.0152	notB
0000091-94-1	Nc1ccc(cc1Cl)c1ccc(c(c1)Cl)N	2.35582	notB
0000091-96-3	O=C(Nc1ccc(cc1C)c1ccc(c(c1)C)NC(=O)CC(=O)C)CC(=O)C	-0.175	notB
0000092-06-8	c1cc(cc(c1)c1ccccc1)c1ccccc1	1.32899	notB
0000092-24-0	c1ccc2c(c1)cc1c(c2)cc2c(c1)cccc2	2.41	notB
0000092-52-4	c1ccc(cc1)c1ccccc1	2.61	notB
0000092-69-3	Oc1ccc(cc1)c1ccccc1	1.65911	notB
0000092-70-6	OC(=O)c1cc2ccccc2cc1O	0.366667	notB
0000092-77-3	O=C(c1cc2ccccc2cc1O)Nc1ccccc1	0.720073	notB
0000092-83-1	c1ccc2c(c1)Oc1c(C2)cccc1	3.62	B
0000092-84-2	c1ccc2c(c1)Sc1c(N2)cccc1	2.65049	notB
0000092-86-4	Brc1ccc(cc1)c1ccc(cc1)Br	3.55512	B
0000092-87-5	Nc1ccc(cc1)c1ccc(cc1)N	1.84167	notB
0000092-88-6	Oc1ccc(cc1)c1ccc(cc1)O	1.525	notB
0000093-46-9	c1ccc2c(c1)cc(cc2)Nc1ccc(cc1)Nc1ccc2c(c1)cccc2	3.28	notB
0000093-76-5	OC(=O)COc1cc(Cl)c(cc1Cl)Cl	0.998182	notB
0000094-52-0	O=N(=O)c1ccc2c(c1)[nH]cn2	0.298614	notB
0000094-74-6	OC(=O)COc1ccc(cc1C)Cl	0.406667	notB
0000094-75-7	OC(=O)COc1ccc(cc1Cl)Cl	1.18	notB
0000095-14-7	c1ccc2c(c1)n[nH]n2	0.83	notB
0000095-16-9	c1ccc2c(c1)scn2	0.746148	notB
0000095-47-6	Cc1ccccc1C	1.18	notB
0000095-48-7	Cc1ccccc1O	1.03	notB
0000095-49-8	Cc1ccccc1Cl	1.89148	notB
0000095-50-1	Clc1ccccc1Cl	2.48292	notB
0000095-51-2	Nc1ccccc1Cl	0.840592	notB
0000095-53-4	Cc1ccccc1N	0.44	notB
0000095-56-7	Oc1ccccc1Br	1.60582	notB
0000095-57-8	Oc1ccccc1Cl	1.55629	notB
0000095-63-6	Cc1ccc(c(c1)C)C	2.21531	notB
0000095-64-7	Nc1ccc(c(c1)C)C	0.880708	notB
0000095-68-1	Cc1ccc(c(c1)C)N	0.815	notB
0000095-69-2	Clc1ccc(c(c1)C)N	1.43503	notB
0000095-73-8	Clc1ccc(c(c1)Cl)C	2.95	notB
0000095-76-1	Nc1ccc(c(c1)Cl)Cl	1.26683	notB
0000095-77-2	Oc1ccc(c(c1)Cl)Cl	1.71209	notB
0000095-78-3	Cc1ccc(c(c1)N)C	0.805702	notB
0000095-82-9	Clc1ccc(c(c1)N)Cl	1.31974	notB
0000095-94-3	Clc1cc(Cl)c(cc1Cl)Cl	3.81198	B
0000095-95-4	Clc1cc(Cl)c(cc1O)Cl	2.27692	notB
0000096-12-8	ClCC(CBr)Br	1.28306	notB
0000096-18-4	ClCC(CCl)Cl	1.02525	notB
0000096-29-7	CC(=NO)CC	0.369687	notB
0000096-45-7	S=C1NCCN1	-0.0301058	notB
0000096-50-4	Nc1nccs1	0.065	notB
0000096-69-5	CC(c1cc(Sc2cc(c(cc2C)O)C(C)(C)C)c(cc1O)C)(C)C	0.816667	notB
0000096-76-4	Oc1ccc(cc1C(C)(C)C)C(C)(C)C	2.49107	notB
0000096-91-3	O=N(=O)c1cc(N)c(c(c1)N(=O)=O)O	0.355	notB
0000096-96-8	COc1ccc(c(c1)N(=O)=O)N	0.752658	notB
0000097-00-7	O=N(=O)c1ccc(c(c1)N(=O)=O)Cl	1.13	notB
0000097-02-9	O=N(=O)c1ccc(c(c1)N(=O)=O)N	1.11	notB
0000097-23-4	Oc1ccc(cc1Cc1cc(Cl)ccc1O)Cl	2.1106	notB
0000097-77-8	CCN(C(=S)SSC(=S)N(CC)CC)CC	2.35	notB
0000098-08-8	FC(c1ccccc1)(F)F	1.64931	notB
0000098-10-2	NS(=O)(=O)c1ccccc1	0.409997	notB
0000098-15-7	Clc1cccc(c1)C(F)(F)F	2.08805	notB
0000098-47-5	O=N(=O)c1cccc(c1)S(=O)(=O)O	0.7	notB
0000098-54-4	CC(c1ccc(cc1)O)(C)C	1.80248	notB
0000098-56-6	FC(c1ccc(cc1)Cl)(F)F	2.21	notB
0000098-73-7	OC(=O)c1ccc(cc1)C(C)(C)C	0.43131	notB
0000098-81-7	BrC(=C)c1ccccc1	2.19	notB
0000098-82-8	CC(c1ccccc1)C	1.55	notB
0000098-83-9	CC(=C)c1ccccc1	1.85604	notB
0000098-84-0	CC(c1ccccc1)N	0.685	notB
0000098-95-3	O=N(=O)c1ccccc1	0.658806	notB
0000099-08-1	Cc1cccc(c1)N(=O)=O	0.981287	notB
0000099-09-2	Nc1cccc(c1)N(=O)=O	0.688166	notB
0000099-54-7	O=N(=O)c1ccc(c(c1)Cl)Cl	1.98282	notB
0000099-62-7	CC(c1cccc(c1)C(C)C)C	2.94705	notB
0000099-64-9	CN(c1cccc(c1)C(=O)O)C	1.105	notB
0000099-65-0	O=N(=O)c1cccc(c1)N(=O)=O	0.771545	notB
0000099-71-8	CCC(c1ccc(cc1)O)C	1.41362	notB
0000099-88-7	CC(c1ccc(cc1)N)C	1.035	notB
0000099-99-0	Cc1ccc(cc1)N(=O)=O	0.970512	notB
0000100-00-5	Clc1ccc(cc1)N(=O)=O	1.7452	notB
0000100-01-6	Nc1ccc(cc1)N(=O)=O	0.685875	notB
0000100-02-7	Oc1ccc(cc1)N(=O)=O	1.00581	notB
0000100-17-4	COc1ccc(cc1)N(=O)=O	1.0479	notB
0000100-25-4	O=N(=O)c1ccc(cc1)N(=O)=O	-0.398455	notB
0000100-26-5	OC(=O)c1ccc(cn1)C(=O)O	0.710175	notB
0000100-37-8	OCCN(CC)CC	0.29	notB
0000100-40-3	C=CC1CCC=CC1	2.24959	notB
0000100-41-4	CCc1ccccc1	1.19	notB
0000100-42-5	C=Cc1ccccc1	1.13	notB
0000100-43-6	C=Cc1ccncc1	1.92131	notB
0000100-61-8	CNc1ccccc1	0.70732	notB
0000100-66-3	COc1ccccc1	1.34	notB
0000100-80-1	C=Cc1cccc(c1)C	1.55	notB
0000101-02-0	c1ccc(cc1)OP(Oc1ccccc1)Oc1ccccc1	2.39223	notB
0000101-14-4	Nc1ccc(cc1Cl)Cc1ccc(c(c1)Cl)N	2.38047	notB
0000101-20-2	O=C(Nc1ccc(c(c1)Cl)Cl)Nc1ccc(cc1)Cl	1.98	notB
0000101-53-1	Oc1ccc(cc1)Cc1ccccc1	1.46647	notB
0000101-61-1	CN(c1ccc(cc1)Cc1ccc(cc1)N(C)C)C	2.74	notB
0000101-67-7	CCCCCCCCc1ccc(cc1)Nc1ccc(cc1)CCCCCCCC	0.705	notB
0000101-68-8	O=C=Nc1ccc(cc1)Cc1ccc(cc1)N=C=O	2.35	notB
0000101-70-2	COc1ccc(cc1)Nc1ccc(cc1)OC	1.885	notB
0000101-77-9	Nc1ccc(cc1)Cc1ccc(cc1)N	1.04535	notB
0000101-81-5	c1ccc(cc1)Cc1ccccc1	2.98731	notB
0000101-84-8	c1ccc(cc1)Oc1ccccc1	2.61861	notB
0000102-06-7	N=C(Nc1ccccc1)Nc1ccccc1	0.8	notB
0000102-70-5	C=CCN(CC=C)CC=C	0.687182	notB
0000102-71-6	OCCN(CCO)CCO	0.0975	notB
0000102-81-8	CCCCN(CCCC)CCO	1.145	notB
0000102-82-9	CCCCN(CCCC)CCCC	1.32132	notB
0000103-23-1	CCCCC(COC(=O)CCCCC(=O)OCC(CCCC)CC)CC	1.43	notB
0000103-44-6	CCCCC(COC=C)CC	3.00574	notB
0000103-50-4	O(Cc1ccccc1)Cc1ccccc1	2.50336	notB
0000103-64-0	BrC=Cc1ccccc1	2.265	notB
0000103-69-5	CCNc1ccccc1	1.01171	notB
0000103-83-3	CN(Cc1ccccc1)C	0.952191	notB
0000104-40-5	CCCCCCCCCc1ccc(cc1)O	2.52984	notB
0000104-43-8	CCCCCCCCCCCCc1ccc(cc1)O	2.672	notB
0000104-88-1	O=Cc1ccc(cc1)Cl	0.742628	notB
0000105-05-5	CCc1ccc(cc1)CC	2.46865	notB
0000105-06-6	C=Cc1ccc(cc1)C=C	2.48	notB
0000105-67-9	Cc1ccc(c(c1)C)O	1.95	notB
0000106-37-6	Brc1ccc(cc1)Br	2.16255	notB
0000106-41-2	Oc1ccc(cc1)Br	1.653	notB
0000106-42-3	Cc1ccc(cc1)C	1.20333	notB
0000106-43-4	Cc1ccc(cc1)Cl	1.74157	notB
0000106-46-7	Clc1ccc(cc1)Cl	2.31632	notB
0000106-47-8	Nc1ccc(cc1)Cl	0.562076	notB
0000106-48-9	Oc1ccc(cc1)Cl	1.34273	notB
0000106-49-0	Cc1ccc(cc1)N	0.61	notB
0000106-50-3	Nc1ccc(cc1)N	1.805	notB
0000106-93-4	BrCCBr	0.608058	notB
0000107-02-8	C=CC=O	2.54	notB
0000107-05-1	ClCC=C	0.353257	notB
0000107-06-2	ClCCCl	0.3	notB
0000107-13-1	C=CC#N	1.5	notB
0000107-21-1	OCCO	-0.5	notB
0000107-39-1	CC(=C)CC(C)(C)C	2.81666	notB
0000107-66-4	CCCCOP(=O)(OCCCC)O	0.426667	notB
0000108-00-9	NCCN(C)C	0.25	notB
0000108-36-1	Brc1cccc(c1)Br	2.29667	notB
0000108-38-3	Cc1cccc(c1)C	1.20333	notB
0000108-39-4	Cc1cccc(c1)O	1.22667	notB
0000108-42-9	Nc1cccc(c1)Cl	0.328571	notB
0000108-43-0	Oc1cccc(c1)Cl	1.11381	notB
0000108-45-2	Nc1cccc(c1)N	0.800508	notB
0000108-57-6	C=Cc1cccc(c1)C=C	2.54	notB
0000108-60-1	ClCC(OC(CCl)C)C	0.6973	notB
0000108-67-8	Cc1cc(C)cc(c1)C	2.40398	notB
0000108-70-3	Clc1cc(Cl)cc(c1)Cl	3.32008	B
0000108-78-1	Nc1nc(N)nc(n1)N	0.18	notB
0000108-80-5	O=c1[nH]c(=O)[nH]c(=O)[nH]1	-0.65	notB
0000108-86-1	Brc1ccccc1	1.49272	notB
0000108-87-2	CC1CCCCC1	2.33252	notB
0000108-88-3	Cc1ccccc1	1.505	notB
0000108-90-7	Clc1ccccc1	1.71093	notB
0000108-95-2	Oc1ccccc1	1.35143	notB
0000108-99-6	Cc1cccnc1	0.97	notB
0000109-02-4	CN1CCOCC1	1	notB
0000109-06-8	Cc1ccccn1	0.49	notB
0000109-09-1	Clc1ccccn1	1.41571	notB
0000109-69-3	CCCCCl	1.2148	notB
0000109-70-6	ClCCCBr	0.72	notB
0000110-00-9	c1ccco1	0.503763	notB
0000110-02-1	c1cccs1	0.737535	notB
0000110-16-7	OC(=O)C=CC(=O)O	1	notB
0000110-30-5	CCCCCCCCCCCCCCCCCC(=O)NCCNC(=O)CCCCCCCCCCCCCCCCC	0.393333	notB
0000110-81-6	CCSSCC	1.69	notB
0000110-82-7	C1CCCCC1	1.95877	notB
0000110-83-8	C1CCC=CC1	1.615	notB
0000110-85-0	N1CCNCC1	0.22095	notB
0000110-86-1	c1cccnc1	1.94	notB
0000110-91-8	C1CNCCO1	0.0726029	notB
0000110-98-5	CC(COCC(O)C)O	0.392743	notB
0000111-27-3	CCCCCCO	-0.272	notB
0000111-40-0	NCCNCCN	0.383215	notB
0000111-41-1	NCCNCCO	0.0761066	notB
0000111-44-4	ClCCOCCCl	1.00987	notB
0000111-76-2	CCCCOCCO	-0.22	notB
0000111-84-2	CCCCCCCCC	3.15	notB
0000111-94-4	N#CCCNCCC#N	-0.262433	notB
0000112-24-3	NCCNCCNCCN	0.2	notB
0000112-27-6	OCCOCCOCCO	3.23	notB
0000112-40-3	CCCCCCCCCCCC	2.53837	notB
0000112-41-4	CCCCCCCCCCC=C	3.4	B
0000113-00-8	NC(=N)N	-1	notB
0000115-28-6	OC(=O)C1C(C(=O)O)C2(C(C1(Cl)C(=C2Cl)Cl)(Cl)Cl)Cl	-0.072	notB
0000115-29-7	O=S1OCC2C(CO1)C1(C(C2(Cl)C(=C1Cl)Cl)(Cl)Cl)Cl	2.29561	notB
0000115-32-2	OC(C(Cl)(Cl)Cl)(c1ccc(cc1)Cl)c1ccc(cc1)Cl	3.68262	B
0000115-77-5	OCC(CO)(CO)CO	-0.0297518	notB
0000115-86-6	O=P(Oc1ccccc1)(Oc1ccccc1)Oc1ccccc1	2.62769	notB
0000115-90-2	CCOP(=S)(Oc1ccc(cc1)S(=O)C)OCC	1.68	notB
0000115-96-8	ClCCOP(=O)(OCCCl)OCCCl	0.143229	notB
0000117-18-0	Clc1cc(Cl)c(c(c1Cl)N(=O)=O)Cl	3.0068	notB
0000117-79-3	Nc1ccc2c(c1)C(=O)c1c(C2=O)cccc1	1.92824	notB
0000117-80-6	O=C1C(=C(Cl)C(=O)c2c1cccc2)Cl	4.04	B
0000117-81-7	CCCCC(COC(=O)c1ccccc1C(=O)OCC(CCCC)CC)CC	2.1692	notB
0000117-84-0	CCCCCCCCOC(=O)c1ccccc1C(=O)OCCCCCCCC	2.66667	notB
0000118-44-5	CCNc1cccc2c1cccc2	2.54579	notB
0000118-69-4	Clc1cccc(c1C)Cl	2.835	notB
0000118-74-1	Clc1c(Cl)c(Cl)c(c(c1Cl)Cl)Cl	3.88382	B
0000118-79-6	Brc1cc(Br)c(c(c1)Br)O	2.51253	notB
0000118-82-1	CC(c1cc(Cc2cc(c(c(c2)C(C)(C)C)O)C(C)(C)C)cc(c1O)C(C)(C)C)(C)C	2.42833	notB
0000118-83-2	Clc1ccc(c(c1)C(F)(F)F)N(=O)=O	2.42914	notB
0000118-91-2	OC(=O)c1ccccc1Cl	0.6	notB
0000118-96-7	O=N(=O)c1cc(N(=O)=O)c(c(c1)N(=O)=O)C	0.643	notB
0000119-06-2	CCCCCCCCCCCCCOC(=O)c1ccccc1C(=O)OCCCCCCCCCCCCC	1.17	notB
0000119-12-0	CCOP(=S)(Oc1ccc(=O)n(n1)c1ccccc1)OCC	1.53262	notB
0000119-33-5	Cc1ccc(c(c1)N(=O)=O)O	1.61345	notB
0000119-47-1	Cc1cc(Cc2cc(C)cc(c2O)C(C)(C)C)c(c(c1)C(C)(C)C)O	2.3698	notB
0000119-56-2	Clc1ccc(cc1)C(c1ccccc1)O	1.6869	notB
0000119-61-9	O=C(c1ccccc1)c1ccccc1	0.934123	notB
0000119-64-2	C1CCc2c(C1)cccc2	2.48	notB
0000119-93-7	Nc1ccc(cc1C)c1ccc(c(c1)C)N	1.61244	notB
0000120-12-7	c1ccc2c(c1)cc1c(c2)cccc1	3.03433	notB
0000120-52-5	O=C(c1ccccc1)ON=C1C=CC(=NOC(=O)c2ccccc2)C=C1	0.495126	notB
0000120-54-7	S=C(N1CCCCC1)SSSSC(=S)N1CCCCC1	1.11774	notB
0000120-71-8	COc1ccc(cc1N)C	0.917	notB
0000120-78-5	c1ccc2c(c1)sc(n2)SSc1nc2c(s1)cccc2	1.19598	notB
0000120-82-1	Clc1ccc(c(c1)Cl)Cl	2.94404	notB
0000120-95-6	CCC(c1ccc(c(c1)C(CC)(C)C)O)(C)C	2.63	notB
0000121-03-9	O=N(=O)c1ccc(c(c1)S(=O)(=O)O)C	0.105	notB
0000121-14-2	O=N(=O)c1ccc(c(c1)N(=O)=O)C	0.852343	notB
0000121-44-8	CCN(CC)CC	0.196	notB
0000121-57-3	Nc1ccc(cc1)S(=O)(=O)O	0.035	notB
0000121-69-7	CN(c1ccccc1)C	0.96557	notB
0000121-73-3	Clc1cccc(c1)N(=O)=O	1.94907	notB
0000121-75-5	CCOC(=O)CC(C(=O)OCC)SP(=S)(OC)OC	0.994439	notB
0000121-82-4	O=N(=O)N1CN(CN(C1)N(=O)=O)N(=O)=O	0.530465	notB
0000121-86-8	O=N(=O)c1ccc(c(c1)Cl)C	1.69	notB
0000121-92-6	OC(=O)c1cccc(c1)N(=O)=O	0.45	notB
0000122-14-5	COP(=S)(Oc1ccc(c(c1)C)N(=O)=O)OC	1.82705	notB
0000122-20-3	CC(CN(CC(O)C)CC(O)C)O	-0.73	notB
0000122-34-9	CCNc1nc(NCC)nc(n1)Cl	1.48934	notB
0000122-39-4	c1ccc(cc1)Nc1ccccc1	2.007	notB
0000122-57-6	CC(=O)C=Cc1ccccc1	0.745	notB
0000122-80-5	CC(=O)Nc1ccc(cc1)N	0.355	notB
0000123-30-8	Nc1ccc(cc1)O	1.625	notB
0000123-31-9	Oc1ccc(cc1)O	1.585	notB
0000123-33-1	O=c1ccc(=O)[nH][nH]1	-0.2	notB
0000123-48-8	CC(=CC(C)(C)C)CC(C)(C)C	3.29	notB
0000123-63-7	CC1OC(C)OC(O1)C	0.04625	notB
0000123-77-3	NC(=O)N=NC(=O)N	1.175	notB
0000123-91-1	O1CCOCC1	-0.272257	notB
0000124-11-8	CCCCCCCC=C	2.17897	notB
0000124-64-1	OCP(CO)(CO)CO	1.97	notB
0000124-73-2	FC(C(Br)(F)F)(Br)F	1.565	notB
0000126-30-7	OCC(CO)(C)C	0.230541	notB
0000126-33-0	O=S1(=O)CCCC1	0.581429	notB
0000126-58-9	OCC(COCC(CO)(CO)CO)(CO)CO	0.31	notB
0000126-72-7	BrCC(COP(=O)(OCC(CBr)Br)OCC(CBr)Br)Br	1.41658	notB
0000126-73-8	CCCCOP(=O)(OCCCC)OCCCC	1.2945	notB
0000127-18-4	ClC(=C(Cl)Cl)Cl	1.71746	notB
0000127-20-8	OC(=O)C(Cl)(Cl)C	0.651362	notB
0000127-27-5	C=CC1(C)CCC2C(=C1)CCC1C2(C)CCCC1(C)C(=O)O	1.84866	notB
0000127-68-4	O=N(=O)c1cccc(c1)S(=O)(=O)O	0.46366	notB
0000127-90-2	ClC(C(Cl)(Cl)Cl)COCC(C(Cl)(Cl)Cl)Cl	2.66647	notB
0000128-37-0	Cc1cc(c(c(c1)C(C)(C)C)O)C(C)(C)C	3.20018	notB
0000128-39-2	CC(c1cccc(c1O)C(C)(C)C)(C)C	2.82	notB
0000129-00-0	c1cc2ccc3c4c2c(c1)ccc4ccc3	2.8858	notB
0000129-43-1	Oc1cccc2c1C(=O)c1ccccc1C2=O	1.88499	notB
0000130-13-2	Nc1ccc(c2c1cccc2)S(=O)(=O)O	0.961429	notB
0000131-09-9	Clc1ccc2c(c1)C(=O)c1c(C2=O)cccc1	2.33024	notB
0000131-11-3	COC(=O)c1ccccc1C(=O)OC	1.76	notB
0000131-52-2	Clc1c(O)c(Cl)c(c(c1Cl)Cl)Cl	2.09164	notB
0000131-55-5	Oc1ccc(c(c1)O)C(=O)c1ccc(cc1O)O	0.022	notB
0000131-57-7	COc1ccc(c(c1)O)C(=O)c1ccccc1	1.94874	notB
0000132-64-9	c1ccc2c(c1)oc1c2cccc1	3.27605	notB
0000132-65-0	c1ccc2c(c1)sc1c2cccc1	3.26452	notB
0000134-32-7	Nc1cccc2c1cccc2	1.44115	notB
0000134-47-4	O=C(Nc1ccc2c(c1)cc(cc2O)S(=O)(=O)O)Nc1ccc2c(c1)cc(cc2O)S(=O)(=O)O	1.06	notB
0000134-62-3	CCN(C(=O)c1cccc(c1)C)CC	0.350532	notB
0000135-88-6	c1ccc(cc1)Nc1ccc2c(c1)cccc2	2.33035	notB
0000137-26-8	CN(C(=S)SSC(=S)N(C)C)C	0.527715	notB
0000137-30-4	CN(C(=S)S)C	2.31	notB
0000139-13-9	OC(=O)CN(CC(=O)O)CC(=O)O	1.75	notB
0000139-87-7	OCCN(CCO)CC	0.54	notB
0000140-66-9	CC(c1ccc(cc1)O)(CC(C)(C)C)C	1.73667	notB
0000141-78-6	CCOC(=O)C	1.48	notB
0000141-93-5	CCc1cccc(c1)CC	2.78784	notB
0000142-96-1	CCCCOCCCC	1.90385	notB
0000143-50-0	O=C1C2(Cl)C3(C4(C1(Cl)C1(C2(C3(Cl)C(C41Cl)(Cl)Cl)Cl)Cl)Cl)Cl	3.1672	notB
0000144-19-4	OCC(C(C(C)C)O)(C)C	-0.222879	notB
0000145-73-3	OC(=O)C1C2CCC(C1C(=O)O)O2	1	notB
0000148-24-3	Oc1cccc2c1nccc2	1.115	notB
0000149-30-4	S=c1sc2c([nH]1)cccc2	0.4	notB
0000151-21-3	CCCCCCCCCCCCOS(=O)(=O)O	0.0759091	notB
0000152-11-4	COc1ccc(cc1OC)CCN(CCCC(c1ccc(c(c1)OC)OC)(C(C)C)C#N)C	1.27687	notB
0000156-43-4	CCOc1ccc(cc1)N	0.58	notB
0000184-90-8	O=C1C=CC(=Nc2ccccc2)C=C1	1.295	notB
0000198-55-0	c1cc2cccc3c2c(c1)c1cccc2c1c3ccc2	2.38	notB
0000206-44-0	c1ccc2c(c1)c1cccc3c1c2ccc3	3.322	B
0000208-96-8	c1cc2cccc3c2c(c1)C=C3	2.76027	notB
0000217-59-4	c1ccc2c(c1)c1ccccc1c1c2cccc1	2.41	notB
0000218-01-9	c1ccc2c(c1)c1ccc3c(c1cc2)cccc3	2.4	notB
0000218-17-8	CCOP(=S)(SCCS(=O)(=O)CC)OCC	0.46	notB
0000218-21-0	CCOP(=S)(OCC)SCCS(=O)CC	0	notB
0000225-11-6	c1ccc2c(c1)cc1c(n2)ccc2c1cccc2	2.025	notB
0000226-36-8	c1ccc2c(c1)c1cc3ccc4c(c3nc1cc2)cccc4	2.46485	notB
0000260-94-6	c1ccc2c(c1)nc1c(c2)cccc1	2.37	notB
0000262-12-4	c1ccc2c(c1)Oc1c(O2)cccc1	3.85	B
0000271-89-6	c1ccc2c(c1)occ2	2.56	notB
0000280-57-9	C1CN2CCN1CC2	0.69	notB
0000281-23-2	C1C2CC3CC1CC(C2)C3	3.42	B
0000294-62-2	C1CCCCCCCCCCC1	3.53376	B
0000298-00-0	COP(=S)(Oc1ccc(cc1)N(=O)=O)OC	1.11908	notB
0000298-02-2	CCSCSP(=S)(OCC)OCC	1.95	notB
0000298-04-4	CCSCCSP(=S)(OCC)OCC	2.08222	notB
0000298-06-6	CCOP(=S)(OCC)S	0.358333	notB
0000298-07-7	CCCCC(COP(=O)(OCC(CCCC)CC)O)CC	0.586557	notB
0000299-84-3	COP(=S)(Oc1cc(Cl)c(cc1Cl)Cl)OC	2.09112	notB
0000300-76-5	COP(=O)(OC(C(Br)(Cl)Cl)Br)OC	0.93	notB
0000306-52-5	ClC(COP(=O)(O)O)(Cl)Cl	0.145067	notB
0000306-83-2	ClC(C(F)(F)F)Cl	1.355	notB
0000306-98-9	FC(C1(F)C(F)(C(F)(F)F)C(F)(F)C(C(C1(F)F)(F)F)(F)F)(F)F	3.92	B
0000307-34-6	FC(C(C(C(F)(F)F)(F)F)(F)F)(C(C(C(C(F)(F)F)(F)F)(F)F)(F)F)F	3.59	B
0000307-55-1	OC(=O)C(C(C(C(C(C(C(C(C(C(C(F)(F)F)(F)F)(F)F)(F)F)(F)F)(F)F)(F)F)(F)F)(F)F)(F)F)(F)F	3.08111	notB
0000307-70-0	OCC(C(C(C(C(C(C(C(C(C(F)F)(F)F)(F)F)(F)F)(F)F)(F)F)(F)F)(F)F)(F)F)(F)F	3.355	B
0000309-00-2	ClC1=C(Cl)C2(C(C1(Cl)C1C2C2CC1C=C2)(Cl)Cl)Cl	2.43578	notB
0000311-89-7	FC(C(C(C(F)(F)F)(F)F)(F)F)(N(C(C(C(C(F)(F)F)(F)F)(F)F)(F)F)C(C(C(C(F)(F)F)(F)F)(F)F)(F)F)F	0.518	notB
0000314-40-9	CCC(n1c(=O)[nH]c(c(c1=O)Br)C)C	0.706287	notB
0000315-18-4	CNC(=O)Oc1cc(C)c(c(c1)C)N(C)C	1.41667	notB
0000318-98-9	OC(COc1cccc2c1cccc2)CNC(C)C	2.2875	notB
0000319-84-6	ClC1C(Cl)C(Cl)C(C(C1Cl)Cl)Cl	2.78649	notB
0000320-60-5	Clc1ccc(c(c1)Cl)C(F)(F)F	2.42404	notB
0000328-84-7	Clc1ccc(cc1Cl)C(F)(F)F	3.095	notB
0000330-54-1	O=C(N(C)C)Nc1ccc(c(c1)Cl)Cl	1.24053	notB
0000330-55-2	CON(C(=O)Nc1ccc(c(c1)Cl)Cl)C	1.06586	notB
0000333-41-5	CCOP(=S)(Oc1cc(C)nc(n1)C(C)C)OCC	1.86678	notB
0000335-36-4	FC(C(C(C1(F)OC(C(C1(F)F)(F)F)(F)F)(F)F)(F)F)(C(F)(F)F)F	3.4675	B
0000335-57-9	FC(C(C(C(F)(F)F)(F)F)(F)F)(C(C(C(F)(F)F)(F)F)(F)F)F	3.5	B
0000335-67-1	OC(=O)C(C(C(C(C(C(C(F)(F)F)(F)F)(F)F)(F)F)(F)F)(F)F)(F)F	2.116	notB
0000335-76-2	OC(=O)C(C(C(C(C(C(C(C(C(F)(F)F)(F)F)(F)F)(F)F)(F)F)(F)F)(F)F)(F)F)(F)F	3.58833	B
0000335-99-9	OCC(C(C(C(C(C(F)F)(F)F)(F)F)(F)F)(F)F)(F)F	1.36	notB
0000346-10-1	CCC(C(=O)Nc1ccc(c(c1)O)NC(=O)C(C(C(F)(F)F)(F)F)(F)F)Oc1ccc(cc1C(CC)(C)C)C(CC)(C)C	1.976	notB
0000351-00-2	Nc1cc(c(c2c1C(=O)c1c(C2=O)c(N)cc(c1O)S(=O)(=O)O)O)S(=O)(=O)O	0.1	notB
0000355-80-6	OCC(C(C(C(F)F)(F)F)(F)F)(F)F	0.97	notB
0000360-97-4	NC(=O)c1[nH]cnc1N	0.715	notB
0000375-95-1	OC(=O)C(C(C(C(C(C(C(C(F)(F)F)(F)F)(F)F)(F)F)(F)F)(F)F)(F)F)(F)F	3.4	B
0000376-06-7	OC(=O)C(C(C(C(C(C(C(C(C(C(C(C(C(F)(F)F)(F)F)(F)F)(F)F)(F)F)(F)F)(F)F)(F)F)(F)F)(F)F)(F)F)(F)F)(F)F	4.03125	B
0000402-31-3	FC(c1cccc(c1)C(F)(F)F)(F)F	2.51	notB
0000461-58-5	NC(=N)NC#N	0.086	notB
0000462-08-8	Nc1cccnc1	-0.19	notB
0000471-77-2	CC(=C1CCC2C(=C1)CCC1C2(C)CCCC1(C)C(=O)O)C	2.13704	notB
0000473-54-1	CC1(O)CCC2CC1C2(C)C	0.83	notB
0000475-03-6	Cc1ccc2c(c1)CCCC2(C)C	3.33	B
0000479-27-6	Nc1cccc2c1c(N)ccc2	0.750918	notB
0000482-89-3	O=C1c2ccccc2NC1=C1Nc2c(C1=O)cccc2	0.456903	notB
0000488-23-3	Cc1c(C)ccc(c1C)C	2.82	notB
0000492-97-7	c1csc(c1)c1cccs1	3.55	B
0000493-01-6	C1CCC2C(C1)CCCC2	3.33307	B
0000496-10-6	C1CCC2C(C1)CCC2	2.91	notB
0000497-18-7	NNC(=O)NN	0.65	notB
0000500-28-7	COP(=S)(Oc1ccc(c(c1)Cl)N(=O)=O)OC	0.571359	notB
0000504-03-0	CC1CCCC(N1)C	0.2	notB
0000504-24-5	Nc1ccncc1	0.347069	notB
0000504-29-0	Nc1ccccn1	1.05267	notB
0000504-53-0	CCCCCCCCCCCCCCCCCC(=O)CCCCCCCCCCCCCCCCC	1.22	notB
0000509-34-2	CCN(c1ccc2c(c1)Oc1c(C32OC(=O)c2c3cccc2)ccc(c1)N(CC)CC)CC	0.46	notB
0000510-15-6	CCOC(=O)C(c1ccc(cc1)Cl)(c1ccc(cc1)Cl)O	2.0003	notB
0000512-34-5	CC(CC(C)(C)C)CC(=O)O	0.54	notB
0000512-56-1	COP(=O)(OC)OC	-0.179228	notB
0000514-10-3	CC(C1=CC2=CCC3C(C2CC1)(C)CCCC3(C)C(=O)O)C	1.90184	notB
0000520-45-6	Cc1cc(O)c(c(=O)o1)C(=O)C	2.12012	notB
0000526-73-8	Cc1c(C)cccc1C	2.31599	notB
0000526-78-3	BrC(C(C(=O)O)Br)C(=O)O	0.335597	notB
0000527-20-8	Clc1c(N)c(Cl)c(c(c1Cl)Cl)Cl	2.94	notB
0000527-60-6	Cc1cc(C)c(c(c1)C)O	0.867312	notB
0000534-52-1	O=N(=O)c1cc(C)c(c(c1)N(=O)=O)O	0.129038	notB
0000535-77-3	Cc1cccc(c1)C(C)C	2.9265	notB
0000538-75-0	C1CCC(CC1)N=C=NC1CCCCC1	0.124	notB
0000540-84-1	CC(CC(C)(C)C)C	2.785	notB
0000541-73-1	Clc1cccc(c1)Cl	2.48135	notB
0000542-18-7	ClC1CCCCC1	2.34619	notB
0000544-01-4	CC(CCOCCC(C)C)C	2.63808	notB
0000544-76-3	CCCCCCCCCCCCCCCC	1.24875	notB
0000554-00-7	Clc1ccc(c(c1)Cl)N	1.56092	notB
0000554-84-7	Oc1cccc(c1)N(=O)=O	1.4	notB
0000555-03-3	COc1cccc(c1)N(=O)=O	1.25994	notB
0000563-04-2	Cc1cccc(c1)OP(=O)(Oc1cccc(c1)C)Oc1cccc(c1)C	2.84286	notB
0000567-77-6	CCc1ccc(cc1)C=C	2.69	notB
0000575-41-7	Cc1cc2ccccc2c(c1)C	3.13154	notB
0000576-24-9	Clc1c(O)cccc1Cl	1.71985	notB
0000577-11-7	CCCCC(COC(=O)CC(S(=O)(=O)O)C(=O)OCC(CCCC)CC)CC	0.542222	notB
0000577-55-9	CC(c1ccccc1C(C)C)C	2.14	notB
0000579-10-2	CN(c1ccccc1)C(=O)C	0.698378	notB
0000579-66-8	CCc1cccc(c1N)CC	2.08	notB
0000581-40-8	Cc1cc2ccccc2cc1C	2.71	notB
0000583-39-1	S=c1[nH]c2c([nH]1)cccc2	0.419932	notB
0000583-53-9	Brc1ccccc1Br	3.1	notB
0000583-78-8	Clc1ccc(c(c1)O)Cl	1.18282	notB
0000584-79-2	C=CCC1=C(C)C(CC1=O)OC(=O)C1C(C1(C)C)C=C(C)C	2.265	notB
0000584-84-9	O=C=Nc1ccc(c(c1)N=C=O)C	2.45	notB
0000586-76-5	OC(=O)c1ccc(cc1)Br	1.005	notB
0000591-20-8	Oc1cccc(c1)Br	1.47082	notB
0000591-27-5	Nc1cccc(c1)O	1.148	notB
0000591-35-5	Oc1cc(Cl)cc(c1)Cl	2.16716	notB
0000599-61-1	Nc1cccc(c1)S(=O)(=O)c1cccc(c1)N	0.465	notB
0000599-64-4	Oc1ccc(cc1)C(c1ccccc1)(C)C	2.275	notB
0000603-11-2	OC(=O)c1cccc(c1C(=O)O)N(=O)=O	0.288757	notB
0000605-02-7	c1ccc(cc1)c1cccc2c1cccc2	3.51	B
0000606-20-2	Cc1c(cccc1N(=O)=O)N(=O)=O	1.34154	notB
0000606-28-0	COC(=O)c1ccccc1C(=O)c1ccccc1	1.32738	notB
0000607-99-8	COc1c(Br)cc(cc1Br)Br	2.735	notB
0000608-71-9	Brc1c(O)c(Br)c(c(c1Br)Br)Br	0.79	notB
0000608-93-5	Clc1cc(Cl)c(c(c1Cl)Cl)Cl	3.81084	B
0000609-89-2	Clc1cc(Cl)c(c(c1)N(=O)=O)O	1.38091	notB
0000610-39-9	Cc1ccc(c(c1)N(=O)=O)N(=O)=O	1.37286	notB
0000611-06-3	Clc1ccc(c(c1)Cl)N(=O)=O	1.99526	notB
0000611-21-2	CNc1ccccc1C	0.686823	notB
0000612-22-6	CCc1ccccc1N(=O)=O	0.905358	notB
0000613-12-7	Cc1ccc2c(c1)cc1c(c2)cccc1	2.41	notB
0000615-54-3	Brc1ccc(c(c1)Br)Br	2.77752	notB
0000615-58-7	Brc1ccc(c(c1)Br)O	1.45	notB
0000615-59-8	Brc1ccc(c(c1)C)Br	2.67	notB
0000615-74-7	Cc1ccc(c(c1)O)Cl	0.46462	notB
0000616-44-4	Cc1cscc1	0.668638	notB
0000618-62-2	Clc1cc(cc(c1)Cl)N(=O)=O	2.16999	notB
0000620-92-8	Oc1ccc(cc1)Cc1ccc(cc1)O	1.075	notB
0000622-24-2	ClCCc1ccccc1	1.865	notB
0000622-57-1	CCNc1ccc(cc1)C	0.653717	notB
0000622-97-9	C=Cc1ccc(cc1)C	1.5	notB
0000623-26-7	N#Cc1ccc(cc1)C#N	0.45848	notB
0000626-17-5	N#Cc1cccc(c1)C#N	0.864328	notB
0000626-23-3	CCC(NC(CC)C)C	0.475	notB
0000626-39-1	Brc1cc(Br)cc(c1)Br	3.84883	B
0000626-67-5	CN1CCCCC1	0.84471	notB
0000629-25-4	CCCCCCCCCCCC(=O)O	2.406	notB
0000629-62-9	CCCCCCCCCCCCCCC	1.364	notB
0000634-66-2	Clc1c(Cl)ccc(c1Cl)Cl	3.681	B
0000634-67-3	Nc1ccc(c(c1Cl)Cl)Cl	2.094	notB
0000634-83-3	Clc1c(N)cc(c(c1Cl)Cl)Cl	2.45	notB
0000634-90-2	Clc1cc(Cl)c(c(c1)Cl)Cl	2.94312	notB
0000634-91-3	Nc1cc(Cl)c(c(c1)Cl)Cl	2.42	notB
0000634-93-5	Clc1cc(Cl)c(c(c1)Cl)N	2.18821	notB
0000636-28-2	Brc1cc(Br)c(cc1Br)Br	2.92442	notB
0000636-30-6	Clc1cc(Cl)c(cc1N)Cl	2.205	notB
0000647-42-7	OCCC(C(C(C(C(C(F)(F)F)(F)F)(F)F)(F)F)(F)F)(F)F	1.76	notB
0000678-39-7	OCCC(C(C(C(C(C(C(C(F)(F)F)(F)F)(F)F)(F)F)(F)F)(F)F)(F)F)(F)F	2.765	notB
0000680-31-9	CN(P(=O)(N(C)C)N(C)C)C	-0.043	notB
0000696-44-6	CNc1cccc(c1)C	0.788262	notB
0000698-83-6	OC(=O)Cn1c(=O)sc2c1c(Cl)ccc2	1.56	notB
0000709-98-8	CCC(=O)Nc1ccc(c(c1)Cl)Cl	1.945	notB
0000729-33-5	Clc1ccc2c(c1)nn(n2)c1cc(C)cc(c1O)C(C)(C)C	2.63	notB
0000731-27-1	Cc1ccc(cc1)N(S(=O)(=O)N(C)C)SC(Cl)(Cl)F	1.95	notB
0000732-11-6	COP(=S)(SCN1C(=O)c2c(C1=O)cccc2)OC	0.522038	notB
0000732-26-3	Oc1c(cc(cc1C(C)(C)C)C(C)(C)C)C(C)(C)C	4.17334	B
0000759-94-4	CCCN(C(=O)SCC)CCC	1.78	notB
0000760-23-6	ClC(C=C)CCl	0.757195	notB
0000764-13-6	CC(=CC=C(C)C)C	2.37385	notB
0000767-00-0	N#Cc1ccc(cc1)O	0.91	notB
0000779-02-2	Cc1c2ccccc2cc2c1cccc2	3.19	notB
0000782-74-1	Clc1ccccc1NNc1ccccc1Cl	3.37313	B
0000786-19-6	CCOP(=S)(OCC)SCSc1ccc(cc1)Cl	2.768	notB
0000788-59-2	OC(=O)C(OC(C(OC(C(F)(F)F)(F)F)(F)F)(F)F)(F)F	0.76	notB
0000789-02-6	Clc1ccc(cc1)C(C(Cl)(Cl)Cl)c1ccccc1Cl	3.595	B
0000800-28-0	CC(CC(=O)OCC(COC(=O)CC(S)C)(COC(=O)CC(S)C)COC(=O)CC(S)C)S	2.23	notB
0000801-01-1	COC(C(C(F)(F)F)(F)F)(F)F	1.46	notB
0000803-20-2	OC(=O)C(C(F)(F)F)(OC(C(C(F)(F)F)(F)F)(F)F)F	1.48	notB
0000805-75-8	CN(CCCNC(=O)N)C	0.36	notB
0000808-31-5	FC(C(OC(C(C(C(F)(F)F)F)(F)F)C)(F)F)C(F)(F)F	3.13	notB
0000822-77-5	NCCNCc1ccccc1	0.595	notB
0000827-21-4	Cc1ccc(c(c1)C)S(=O)(=O)O	0.13	notB
0000829-26-5	Cc1ccc2c(c1)cc(c(c2)C)C	3	notB
0000832-69-9	Cc1cccc2c1ccc1c2cccc1	3.18	notB
0000834-12-8	CCNc1nc(NC(C)C)nc(n1)SC	1.17333	notB
0000839-90-7	OCCn1c(=O)n(CCO)c(=O)n(c1=O)CCO	-0.2	notB
0000840-65-3	COC(=O)c1ccc2c(c1)ccc(c2)C(=O)OC	1.58	notB
0000842-18-2	Oc1ccc2c(c1)c(cc(c2)S(=O)(=O)O)S(=O)(=O)O	0	notB
0000843-55-0	Oc1ccc(cc1)C1(CCCCC1)c1ccc(cc1)O	1.605	notB
0000872-05-9	CCCCCCCCC=C	3.22	notB
0000873-63-2	OCc1cccc(c1)Cl	1.35059	notB
0000875-35-4	N#Cc1c(C)cc(nc1Cl)Cl	0.59	notB
0000877-10-1	Cc1c(Cl)c(Cl)c(c(c1Cl)Cl)C	2.73282	notB
0000877-11-2	Clc1c(C)c(Cl)c(c(c1Cl)Cl)Cl	2.57144	notB
0000879-39-0	Clc1cc(N(=O)=O)c(c(c1Cl)Cl)Cl	1.60409	notB
0000882-33-7	c1ccc(cc1)SSc1ccccc1	0.905	notB
0000883-20-5	Cc1cc2ccccc2c2c1cccc2	2.19453	notB
0000886-50-0	CCNc1nc(SC)nc(n1)NC(C)(C)C	1.95	notB
0000901-44-0	OCCOc1ccc(cc1)C(c1ccc(cc1)OCCO)(C)C	1.185	notB
0000903-19-5	CC(c1cc(O)c(cc1O)C(CC(C)(C)C)(C)C)(CC(C)(C)C)C	2.475	notB
0000909-55-4	CC(CC(CC(C)(C)C)(C)C)CC(C)(C)C	2.14333	notB
0000920-66-1	OC(C(F)(F)F)C(F)(F)F	0.2739	notB
0000930-10-9	CCCCCCCCCCCCCOCCOCCOCCOCCOCCOCCOCCOCCO	1.5	notB
0000933-12-0	CC1C=CCC(C1)(C)C	2.87	notB
0000935-95-5	Clc1cc(Cl)c(c(c1Cl)O)Cl	2.15	notB
0000938-22-7	COc1c(Cl)cc(c(c1Cl)Cl)Cl	3.34	B
0000938-86-3	COc1cc(Cl)c(c(c1Cl)Cl)Cl	3.45663	B
0000944-22-9	CCP(=S)(Sc1ccccc1)OCC	1.89	notB
0000944-61-6	COc1c(OC)c(Cl)c(c(c1Cl)Cl)Cl	4.40001	B
0000946-30-5	O=N(=O)c1ccc(c(c1)S(=O)(=O)O)Cl	0.395714	notB
0000947-04-6	O=C1CCCCCCCCCCCN1	0.244876	notB
0000947-72-8	Clc1cc2ccccc2c2c1cccc2	2.47083	notB
0000948-65-2	c1ccc(cc1)c1cc2c([nH]1)cccc2	2.555	notB
0000950-37-8	COc1sc(=O)n(n1)CSP(=S)(OC)OC	0.97056	notB
0000961-11-5	ClC=C(c1cc(Cl)c(cc1Cl)Cl)OP(=O)(OC)OC	1.66991	notB
0000962-58-3	CCOP(=O)(Oc1cc(C)nc(n1)C(C)C)OCC	0.627436	notB
0000986-94-6	O=N(=O)c1cc(c(c(c1Cl)N(=O)=O)Cl)C(F)(F)F	2.46	notB
0000990-23-3	CCCCCCCCCCCCSCCC(=O)Oc1cc(C)c(cc1C(C)(C)C)Sc1cc(c(cc1C)O)C(C)(C)C	1.49	notB
0000991-32-9	CCCCC(COC(=O)CCc1cc(c(c(c1)C(C)(C)C)O)C(C)(C)C)CC	1.76	notB
0000993-52-1	COc1cc(OC)c(cc1C(=O)Oc1ccc(cc1)C(=O)OC)OC	0.26	notB
0000999-73-0	COc1ccccc1NC(=O)C(C(=O)C)N=Nc1ccc(cc1N(=O)=O)S(=O)(=O)O	1	notB
0001000-76-6	COc1cc(Cl)ccc1Oc1ccc(cc1Cl)Cl	3.5	B
0001014-70-6	CCNc1nc(NCC)nc(n1)SC	2.07111	notB
0001024-57-3	ClC1C2OC2C2C1C1(Cl)C(=C(C2(C1(Cl)Cl)Cl)Cl)Cl	4.1	B
0001071-83-6	OC(=O)CNCP(=O)(O)O	1.30286	notB
0001073-72-9	CSc1ccc(cc1)O	0.895	notB
0001074-24-4	Cc1cc(Br)c(cc1Br)C	3.16	notB
0001116-76-3	CCCCCCCCN(CCCCCCCC)CCCCCCCC	1.95652	notB
0001120-01-0	CCCCCCCCCCCCCCCCOS(=O)(=O)O	1.86	notB
0001141-38-4	OC(=O)c1ccc2c(c1)ccc(c2)C(=O)O	0.512327	notB
0001163-19-5	Brc1c(Oc2c(Br)c(Br)c(c(c2Br)Br)Br)c(Br)c(c(c1Br)Br)Br	1.26667	notB
0001190-72-3	O=C1C=Cc2c(C1=NNc1cc(C)c(cc1S(=O)(=O)O)Cl)cccc2	1.442	notB
0001191-50-0	CCCCCCCCCCCCCCOS(=O)(=O)O	1.04	notB
0001193-65-3	O=C1CN2CCC1CC2	0.77	notB
0001197-18-8	NCC1CCC(CC1)C(=O)O	1.01	notB
0001212-29-9	S=C(NC1CCCCC1)NC1CCCCC1	0.669367	notB
0001222-05-5	CC1COCc2c1cc1c(c2)C(C(C1(C)C)C)(C)C	3.02	notB
0001235-13-4	Cc1ccc(c(c1)S(=O)(=O)O)N=Nc1c(O)c(cc2c1cccc2)C(=O)O	0.646667	notB
0001241-94-7	CCCCC(COP(=O)(Oc1ccccc1)Oc1ccccc1)CC	2.69472	notB
0001300-33-3	Nc1cc(cc2c1c(O)cc(c2)S(=O)(=O)O)S(=O)(=O)O	0.133333	notB
0001321-74-0	C=Cc1ccccc1C=C	2.54757	notB
0001322-93-6	CC(c1cc2ccccc2c(c1C(C)C)S(=O)(=O)O)C	0.407876	notB
0001323-65-5	CCCCCCCCCc1c(CCCCCCCCC)cccc1O	2.29	notB
0001330-16-1	CC1C=CC2CC1C2(C)C	2.61	notB
0001330-78-5	Cc1ccccc1OP(=O)(Oc1ccccc1C)Oc1ccccc1C	2.62796	notB
0001420-06-0	O1CCN(CC1)C(c1ccccc1)(c1ccccc1)c1ccccc1	3.11	notB
0001445-75-6	CC(OP(=O)(OC(C)C)C)C	0	notB
0001460-02-2	CC(c1cc(cc(c1)C(C)(C)C)C(C)(C)C)(C)C	3.37275	B
0001477-55-0	NCc1cccc(c1)CN	-0.045	notB
0001490-04-6	CC1CCC(C(C1)O)C(C)C	0.981677	notB
0001502-22-3	O=C1CCCCC1C1=CCCCC1	0.841286	notB
0001506-02-1	CC1CC(C)(C)c2c(C1(C)C)cc(c(c2)C(=O)C)C	2.78	notB
0001544-19-0	FC(C(Oc1ccc(cc1)C(c1ccc(cc1)OC(C(F)F)(F)F)(C)C)(F)F)F	4.35	B
0001552-42-7	CN(c1ccc(cc1)C1(OC(=O)c2c1ccc(c2)N(C)C)c1ccc(cc1)N(C)C)C	3.165	notB
0001570-64-5	Clc1ccc(c(c1)C)O	1.56815	notB
0001582-09-8	CCCN(c1c(cc(cc1N(=O)=O)C(F)(F)F)N(=O)=O)CCC	3.30383	B
0001591-88-5	Brc1cc(c(c2c1C(=O)c1ccccc1C2=O)N)S(=O)(=O)O	0.17	notB
0001610-18-0	COc1nc(NC(C)C)nc(n1)NC(C)C	0.89	notB
0001623-19-4	C=CCOP(=O)(OCC=C)OCC=C	0.774394	notB
0001631-58-9	CN(C1CSSC1)C	1.69121	notB
0001634-04-4	COC(C)(C)C	0.18	notB
0001634-78-2	CCOC(=O)CC(C(=O)OCC)SP(=O)(OC)OC	0.399083	notB
0001667-10-3	ClCc1ccc(cc1)c1ccc(cc1)CCl	1.19	notB
0001678-91-7	CCC1CCCCC1	3.425	B
0001678-98-4	CC(CC1CCCCC1)C	3.3	notB
0001687-30-5	OC(=O)C1CCCCC1C(=O)O	1.09286	notB
0001689-83-4	N#Cc1cc(I)c(c(c1)I)O	1.46	notB
0001689-84-5	N#Cc1cc(Br)c(c(c1)Br)O	1.255	notB
0001702-17-6	Clc1ccc(c(n1)C(=O)O)Cl	0	notB
0001709-70-2	CC(c1cc(Cc2c(C)c(Cc3cc(c(c(c3)C(C)(C)C)O)C(C)(C)C)c(c(c2C)Cc2cc(c(c(c2)C(C)(C)C)O)C(C)(C)C)C)cc(c1O)C(C)(C)C)(C)C	0.455	notB
0001712-70-5	CC(=C)c1ccc(cc1)Cl	3.2639	notB
0001740-19-8	OC(=O)C1(C)CCCC2(C1CCc1c2ccc(c1)C(C)C)C	1.884	notB
0001746-01-6	Clc1cc2Oc3cc(Cl)c(cc3Oc2cc1Cl)Cl	3.22162	notB
0001746-81-2	CON(C(=O)Nc1ccc(cc1)Cl)C	1.3025	notB
0001779-48-2	OP(=O)c1ccccc1	0.310514	notB
0001805-32-9	OCc1ccc(c(c1)Cl)Cl	0.671344	notB
0001806-26-4	CCCCCCCCc1ccc(cc1)O	2.20549	notB
0001817-47-6	CC(c1ccc(cc1)N(=O)=O)C	1.82667	notB
0001825-21-4	COc1c(Cl)c(Cl)c(c(c1Cl)Cl)Cl	3.3779	B
0001825-31-6	Clc1ccc(c2c1cccc2)Cl	3.58333	B
0001827-79-6	O1CC1COc1c2ccccc2c(c2c1cccc2)OCC1OC1	2.29	notB
0001828-52-6	CC1COC(O1)(Cn1cncn1)c1ccc(cc1Cl)Oc1ccc(cc1)Cl	1.98	notB
0001829-62-2	N#Cc1c(Nc2ccc(cc2)S(=O)(=O)O)nc(c(c1C)N=Nc1nc(c(s1)N=Nc1cc2c(c(c1)S(=O)(=O)O)cc(cc2S(=O)(=O)O)S(=O)(=O)O)c1ccc2c(c1)cccc2)Nc1ccc(cc1)S(=O)(=O)O	1.28	notB
0001835-10-1	COC(=O)c1[nH]cnc1C(=O)OC	0.77	notB
0001836-75-5	Clc1ccc(c(c1)Cl)Oc1ccc(cc1)N(=O)=O	3.3375	B
0001836-77-7	Clc1cc(Cl)cc(c1Oc1ccc(cc1)N(=O)=O)Cl	3.05705	notB
0001837-65-7	OS(=O)(=O)c1cc(N=Nc2ccc(cc2)n2nc3c(n2)ccc2c3ccc(c2)S(=O)(=O)O)ccc1C=Cc1ccc(cc1S(=O)(=O)O)n1nc2c(n1)cc(c1c2cccc1)S(=O)(=O)O	0.52	notB
0001838-38-8	CCCc1ccc(cc1)C1OC(C(CO)O)C2C(O1)C(CCC)OC(O2)c1ccc(cc1)CCC	2.18	notB
0001839-48-4	OC1=C(c2ccc3c(n2)c(cc(c3)S(=O)(=O)O)N2C(=O)c3c(C2=O)c(Cl)c(c(c3Cl)Cl)Cl)C(=O)c2c1c(Cl)c(c(c2Cl)Cl)Cl	2.48	notB
0001839-63-0	CC1CC(C)CC(C1)C	3.34	B
0001840-57-9	CCCCCCS(=O)(=O)c1ccc(c(c1)S(=O)(=O)O)Nc1ccc2c3c1c(=O)c1ccccc1c3c(c(=O)n2C)C(=O)c1cccc(c1)S(=O)(=O)O	1.85	notB
0001843-05-6	CCCCCCCCOc1ccc(c(c1)O)C(=O)c1ccccc1	1.9936	notB
0001844-59-7	CCCCC(CN(C(=O)C(NC(=O)Nc1cccc(c1)c1nn2c([nH]1)c(c(n2)C(C)(C)C)Cl)C)CC(CCCC)CC)CC	1.81	notB
0001846-78-9	c1ccc(cc1)OP1(=NP(=NP(=N1)(Oc1ccccc1)Oc1ccccc1)(Oc1ccccc1)Oc1ccccc1)Oc1ccccc1	1.64	notB
0001852-26-7	N#Cc1cnn(c1N=Nc1c(N)n(nc1C(C)(C)C)c1nc(O)nc(n1)n1nc(c(c1N)N=Nc1c(C#N)cnn1c1cc(cc(c1)C(=O)O)C(=O)O)C(C)(C)C)c1cc(cc(c1)C(=O)O)C(=O)O	0.4	notB
0001879-09-0	Cc1cc(C)c(c(c1)C(C)(C)C)O	2.375	notB
0001892-57-5	CCN=C=NCCCN(C)C	0.18	notB
0001897-45-6	N#Cc1c(Cl)c(C#N)c(c(c1Cl)Cl)Cl	2.25826	notB
0001912-24-9	CCNc1nc(NC(C)C)nc(n1)Cl	0.667439	notB
0001934-21-0	O=c1c(N=Nc2ccc(cc2)S(=O)(=O)O)c([nH]n1c1ccc(cc1)S(=O)(=O)O)C(=O)O	-0.03	notB
0001940-42-7	Oc1cc(Cl)c(cc1Cl)Br	2.225	notB
0001945-53-5	CC(C1=CC2=C(CC1)C1(C)CCCC(C1CC2)(C)C(=O)O)C	1.39954	notB
0001987-50-4	CCCCCCCc1ccc(cc1)O	2.74833	notB
0002008-58-4	NC(=O)c1c(Cl)cccc1Cl	2.51	notB
0002012-00-2	CCOP(=O)(c1ccccc1)Oc1ccc(cc1)N(=O)=O	1.10018	notB
0002027-17-0	CC(c1ccc2c(c1)cccc2)C	3.25163	notB
0002032-59-9	CNC(=O)Oc1ccc(c(c1)C)N(C)C	0.724444	notB
0002042-14-0	Oc1ccc(c(c1)N(=O)=O)C	1.34243	notB
0002043-47-2	OCCC(C(C(C(F)(F)F)(F)F)(F)F)(F)F	1.57	notB
0002049-95-8	CCC(c1ccccc1)(C)C	3.18	notB
0002050-67-1	Clc1cccc(c1)c1cccc(c1)Cl	2.63	notB
0002050-68-2	Clc1ccc(cc1)c1ccc(cc1)Cl	2.79125	notB
0002050-74-0	Clc1cccc2c1c(Cl)ccc2	3.79	B
0002050-75-1	Clc1cc2ccccc2cc1Cl	4.04	B
0002050-76-2	Clc1cc(Cl)c2c(c1O)cccc2	1.34429	notB
0002051-24-3	Clc1c(c2c(Cl)c(Cl)c(c(c2Cl)Cl)Cl)c(Cl)c(c(c1Cl)Cl)Cl	3.99661	B
0002051-62-9	Clc1ccc(cc1)c1ccccc1	1.69833	notB
0002057-49-0	c1ccc(cc1)CCCc1ccncc1	1.83	notB
0002058-94-8	OC(=O)C(C(C(C(C(C(C(C(C(C(F)(F)F)(F)F)(F)F)(F)F)(F)F)(F)F)(F)F)(F)F)(F)F)(F)F	3.02444	notB
0002078-54-8	CC(c1cccc(c1O)C(C)C)C	1.545	notB
0002082-79-3	CCCCCCCCCCCCCCCCCCOC(=O)CCc1cc(c(c(c1)C(C)(C)C)O)C(C)(C)C	1	notB
0002104-64-5	CCOP(=S)(c1ccccc1)Oc1ccc(cc1)N(=O)=O	2.41609	notB
0002104-96-3	COP(=S)(Oc1cc(Cl)c(cc1Cl)Br)OC	3.00362	notB
0002122-19-2	CC1CNC(=S)N1	1	notB
0002136-99-4	Clc1c(Cl)cc(c(c1c1c(Cl)c(Cl)cc(c1Cl)Cl)Cl)Cl	4.9225	B
0002144-53-8	O=C(C(=C)C)OCCC(C(C(C(C(C(F)(F)F)(F)F)(F)F)(F)F)(F)F)(F)F	1.08	notB
0002162-99-4	ClCCCCCCCCCl	2.725	notB
0002173-57-1	CC(COc1ccc2c(c1)cccc2)C	2.83085	notB
0002198-77-8	Clc1ccc2c(c1)cc(cc2)Cl	4.04	B
0002212-67-1	CCSC(=O)N1CCCCCC1	1.54187	notB
0002216-69-5	COc1cccc2c1cccc2	2.32344	notB
0002219-82-1	Cc1cccc(c1O)C(C)(C)C	1.915	notB
0002234-13-1	Clc1c(Cl)c(Cl)c(c2c1c(Cl)c(c(c2Cl)Cl)Cl)Cl	2.77793	notB
0002243-62-1	Nc1cccc2c1cccc2N	1.60255	notB
0002255-17-6	COP(=O)(Oc1ccc(c(c1)C)N(=O)=O)OC	0.889507	notB
0002310-17-0	CCOP(=S)(SCn1c(=O)oc2c1ccc(c2)Cl)OCC	2.38	notB
0002371-42-8	CC12CCC(C2(C)C)CC1(C)O	1.47667	notB
0002381-21-7	Cc1ccc2c3c1ccc1c3c(cc2)ccc1	2.73	notB
0002385-85-5	ClC12C(Cl)(Cl)C3(C4(C1(Cl)C1(C2(Cl)C3(C4(C1(Cl)Cl)Cl)Cl)Cl)Cl)Cl	3.30742	B
0002387-23-7	O=C(NC1CCCCC1)NC1CCCCC1	0.095	notB
0002403-88-5	OC1CC(C)(C)NC(C1)(C)C	0.26	notB
0002409-55-4	Cc1ccc(c(c1)C(C)(C)C)O	2.29333	notB
0002425-85-6	Cc1ccc(c(c1)N(=O)=O)NN=C1C(=O)C=Cc2c1cccc2	0.445	notB
0002436-93-3	Cc1cc2cccnc2c(c1)C	1.2925	notB
0002437-79-8	Clc1ccc(c(c1)Cl)c1ccc(cc1Cl)Cl	4.0775	B
0002440-02-0	ClC1CC2(C(C1(Cl)C(=C2Cl)Cl)(Cl)Cl)Cl	4.05	B
0002440-22-4	Cc1ccc(c(c1)n1nc2c(n1)cccc2)O	2.5	notB
0002446-69-7	CCCCCCc1ccc(cc1)O	2.32	notB
0002460-49-3	COc1cc(Cl)c(cc1O)Cl	2.008	notB
0002463-84-5	COP(=S)(Oc1ccc(cc1Cl)N(=O)=O)OC	2.09609	notB
0002465-27-2	CN(c1ccc(cc1)C(=N)c1ccc(cc1)N(C)C)C	0.905988	notB
0002498-66-0	O=C1c2ccccc2C(=O)c2c1ccc1c2cccc1	2.41187	notB
0002528-38-3	CCCCCOP(=O)(OCCCCC)OCCCCC	2.48	notB
0002531-84-2	Cc1ccc2c(c1)ccc1c2cccc1	3.48	B
0002539-17-5	COc1c(O)c(Cl)c(c(c1Cl)Cl)Cl	2.51294	notB
0002539-26-6	COc1c(O)c(OC)c(c(c1Cl)Cl)Cl	1.78	notB
0002580-78-1	Nc1c2C(=O)c3ccccc3C(=O)c2c(cc1S(=O)(=O)O)Nc1cccc(c1)S(=O)(=O)CCOS(=O)(=O)O	0.595	notB
0002581-34-2	Oc1ccc(c(c1)C)N(=O)=O	2.54113	notB
0002611-82-7	O=C1C=Cc2c(C1=NNc1ccc(c3c1cccc3)S(=O)(=O)O)c(cc(c2)S(=O)(=O)O)S(=O)(=O)O	0.245	notB
0002631-40-5	CNC(=O)Oc1ccccc1C(C)C	1.28772	notB
0002636-26-2	COP(=S)(Oc1ccc(cc1)C#N)OC	0.771155	notB
0002642-71-9	CCOP(=S)(SCn1nnc2c(c1=O)cccc2)OCC	2.27	notB
0002655-14-3	CNC(=O)Oc1cc(C)cc(c1)C	0.599788	notB
0002668-24-8	COc1cc(Cl)c(c(c1O)Cl)Cl	2.18315	notB
0002668-47-5	CC(c1cc(cc(c1O)C(C)(C)C)c1ccccc1)(C)C	3.93608	B
0002691-41-0	O=N(=O)N1CN(CN(CN(C1)N(=O)=O)N(=O)=O)N(=O)=O	-0.0866667	notB
0002695-37-6	C=Cc1ccc(cc1)S(=O)(=O)O	0.105	notB
0002719-61-1	CCCCCCCCCCC(c1ccccc1)C	2.41	notB
0002795-39-3	FC(C(C(C(C(S(=O)(=O)O)(F)F)(F)F)(F)F)(F)F)(C(C(C(F)(F)F)(F)F)(F)F)F	3.28	notB
0002814-20-2	O=c1cc(C)[nH]c(n1)C(C)C	0.355057	notB
0002855-13-2	NCC1(C)CC(N)CC(C1)(C)C	0.005	notB
0002885-00-9	CCCCCCCCCCCCCCCCCCS	0.785	notB
0002921-88-2	CCOP(=S)(Oc1nc(Cl)c(cc1Cl)Cl)OCC	2.78245	notB
0003010-80-8	OC(c1ccc(cc1)Cl)(c1ccc(cc1)Cl)c1ccc(cc1)Cl	3.95	B
0003048-65-5	C1=CCC2C(C1)C=CC2	2.49	notB
0003074-71-3	CCCCC(C(C)C)C	3.32	B
0003089-11-0	COCN(c1nc(nc(n1)N(COC)COC)N(COC)COC)COC	0.24	notB
0003194-55-6	BrC1CCC(Br)C(Br)CCC(C(CCC1Br)Br)Br	3.78	B
0003194-57-8	BrC1CCC(Br)C(CCC1Br)Br	3.655	B
0003209-22-1	O=N(=O)c1cccc(c1Cl)Cl	1.98628	notB
0003214-47-9	O=C(Nc1ccc(c(c1)C)N=Nc1cc2c(c(c1)S(=O)(=O)O)cccc2S(=O)(=O)O)Nc1ccc(c(c1)C)N=Nc1cc2c(c(c1)S(=O)(=O)O)cccc2S(=O)(=O)O	0.2	notB
0003229-00-3	BrCC(CBr)(CBr)CBr	2.22456	notB
0003268-87-9	Clc1c2Oc3c(Oc2c(c(c1Cl)Cl)Cl)c(Cl)c(c(c3Cl)Cl)Cl	2.693	notB
0003279-07-0	O=N(=O)c1cc(ccc1O)C(C)(C)C	1.76	notB
0003296-90-0	OCC(CBr)(CBr)CO	0.312231	notB
0003319-31-1	CCCCC(COC(=O)c1cc(ccc1C(=O)OCC(CCCC)CC)C(=O)OCC(CCCC)CC)CC	0.25	notB
0003380-34-5	Clc1ccc(c(c1)O)Oc1ccc(cc1Cl)Cl	2.39023	notB
0003389-71-7	ClC1=C(Cl)C2(C(C1(Cl)C=C2)(Cl)Cl)Cl	2.78539	notB
0003407-42-9	OC1CCCC(C1)C1CC2CC1C(C2(C)C)C	2.76	notB
0003452-97-9	OCCC(CC(C)(C)C)C	0.855	notB
0003481-20-7	Clc1cc(Cl)c(c(c1Cl)N)Cl	2.775	notB
0003520-72-7	Clc1cc(ccc1N=Nc1c(C)[nH]n(c1=O)c1ccccc1)c1ccc(c(c1)Cl)N=Nc1c(C)[nH]n(c1=O)c1ccccc1	0.56	notB
0003531-19-9	O=N(=O)c1cc(Cl)c(c(c1)N(=O)=O)N	1.04	notB
0003576-88-3	Nc1nc(Nc2nc(N)nc(n2)N)nc(n1)N	-1	notB
0003586-14-9	Cc1cccc(c1)Oc1ccccc1	3.27	notB
0003618-60-8	Clc1cc(NN=C2C=Cc3c(C2=O)cccc3O)c(c(c1)S(=O)(=O)O)O	0.649903	notB
0003622-84-2	CCCCNS(=O)(=O)c1ccccc1	0.54	notB
0003648-21-3	CCCCCCCOC(=O)c1ccccc1C(=O)OCCCCCCC	1.36429	notB
0003674-75-7	CCc1cc2ccccc2c2c1cccc2	2.15489	notB
0003761-41-9	COP(=S)(Oc1ccc(c(c1)C)S(=O)C)OC	0.432588	notB
0003761-42-0	COP(=S)(Oc1ccc(c(c1)C)S(=O)(=O)C)OC	1.26954	notB
0003766-81-2	CCC(c1ccccc1OC(=O)NC)C	1.27364	notB
0003772-94-9	CCCCCCCCCCCC(=O)Oc1c(Cl)c(Cl)c(c(c1Cl)Cl)Cl	2.325	notB
0003792-59-4	CCOP(=S)(c1ccccc1)Oc1ccc(cc1Cl)Cl	4.16	B
0003811-49-2	COP1(=S)OCc2c(O1)cccc2	1.75023	notB
0003846-71-7	Oc1c(cc(cc1C(C)(C)C)C(C)(C)C)n1nc2c(n1)cccc2	3.65218	B
0003848-51-9	O=P(Oc1ccccc1)(Oc1ccccc1)Nc1ccccc1	1.86	notB
0003864-99-1	Clc1ccc2c(c1)nn(n2)c1cc(cc(c1O)C(C)(C)C)C(C)(C)C	3.23345	notB
0003871-99-6	FC(C(C(C(C(C(S(=O)(=O)O)(F)F)(F)F)(F)F)(F)F)(F)F)(F)F	2.016	notB
0003891-29-0	CCCCCCCCCCCCCCCCCCNC(=O)N1CC1	1.455	notB
0003965-55-7	COC(=O)c1cc(cc(c1)S(=O)(=O)O)C(=O)OC	-0.02	notB
0004051-66-5	CCCCCCCCCCCCCCCCCCNC(=O)NCCCCCCCCCCCCCCCCCC	2.30833	notB
0004101-68-2	BrCCCCCCCCCCBr	1.58261	notB
0004130-42-1	CCc1cc(c(c(c1)C(C)(C)C)O)C(C)(C)C	3.5643	B
0004162-45-2	OCCOc1c(Br)cc(cc1Br)C(c1cc(Br)c(c(c1)Br)OCCO)(C)C	2.0475	notB
0004175-54-6	CC1CCC(c2c1cccc2)C	3.12	notB
0004286-23-1	CC(=C)c1ccc(cc1)O	1.28	notB
0004292-75-5	CCCCCCC1CCCCC1	3.29	notB
0004404-43-7	OCCN(c1nc(Nc2ccc(c(c2)S(=O)(=O)O)C=Cc2ccc(cc2S(=O)(=O)O)Nc2nc(Nc3ccccc3)nc(n2)N(CCO)CCO)nc(n1)Nc1ccccc1)CCO	0.945	notB
0004531-49-1	COc1ccccc1NC(=O)C(C(=O)C)N=Nc1ccc(cc1Cl)c1ccc(c(c1)Cl)N=NC(C(=O)Nc1ccccc1OC)C(=O)C	0.49	notB
0004620-70-6	OCCNC(C)(C)C	0.295	notB
0004637-24-5	COC(N(C)C)OC	-0.12	notB
0004821-19-6	Oc1c(cccc1C1CCCCC1)C1CCCCC1	3.33093	B
0004883-72-1	O=NN(C1CCCCC1)O	0.947554	notB
0004901-51-3	Clc1c(O)cc(c(c1Cl)Cl)Cl	1.46076	notB
0004904-61-4	C1CC=CCCC=CCCC=C1	3.61586	B
0004979-32-2	C1CCC(CC1)N(C1CCCCC1)Sc1nc2c(s1)cccc2	2.45333	notB
0005102-83-0	Cc1ccc(c(c1)C)NC(=O)C(=NNc1ccc(cc1Cl)c1ccc(c(c1)Cl)NN=C(C(=O)Nc1ccc(cc1C)C)C(=O)C)C(=O)C	0.49	notB
0005103-71-9	ClC1CC2C(C1Cl)C1(C(C2(Cl)C(=C1Cl)Cl)(Cl)Cl)Cl	3.3863	B
0005124-25-4	O=N(=O)c1cc(ccc1Nc1ccccc1)S(=O)(=O)Nc1ccccc1	1.55001	notB
0005332-73-0	COCCCN	0.02	notB
0005409-83-6	Clc1ccc2c(c1)c1cc(Cl)ccc1o2	3.66	B
0005428-54-6	O=N(=O)c1ccc(c(c1)O)C	1.28598	notB
0005468-75-7	CC(=O)C(=NNc1ccc(cc1Cl)c1ccc(c(c1)Cl)NN=C(C(=O)Nc1ccccc1C)C(=O)C)C(=O)Nc1ccccc1C	0.32	notB
0005510-99-6	CCC(c1cccc(c1O)C(CC)C)C	2.82045	notB
0005566-34-7	ClC1=C(Cl)C2(C(C1(Cl)C1C2CC(C1)(Cl)Cl)(Cl)Cl)Cl	2.21815	notB
0005567-15-7	COc1cc(Cl)c(cc1NC(=O)C(C(=O)C)N=Nc1ccc(cc1Cl)c1ccc(c(c1)Cl)N=NC(C(=O)Nc1cc(OC)c(cc1OC)Cl)C(=O)C)OC	0.49	notB
0005586-15-2	c1ccc2c(c1)cc(cc2)SSc1ccc2c(c1)cccc2	0.0166667	notB
0005707-44-8	CCc1ccc(cc1)c1ccccc1	2.98	notB
0005786-21-0	CN1CCN(CC1)C1=Nc2cc(Cl)ccc2Nc2c1cccc2	2.915	notB
0005809-23-4	CCN(c1ccc(c(c1)O)C(=O)c1ccccc1C(=O)O)CC	0.195	notB
0005835-26-7	C=CC1(C)CCC2C(=CCC3C2(C)CCCC3(C)C(=O)O)C1	1.63963	notB
0005902-51-2	Cc1[nH]c(=O)n(c(=O)c1Cl)C(C)(C)C	0.78	notB
0005915-41-3	CCNc1nc(Cl)nc(n1)NC(C)(C)C	0.8225	notB
0006034-54-4	CC(=O)Nc1ccc(cc1)S(=O)(=O)O	0.105	notB
0006099-57-6	Oc1ccc(c2c1cccc2)S(=O)(=O)O	0.71	notB
0006130-75-2	COc1cc(Cl)c(cc1Cl)Cl	2.78837	notB
0006165-51-1	Cc1ccc(c(c1)C(c1ccccc1)C)C	2.9325	notB
0006337-43-5	CCOC(=O)C(=Cc1ccc(cc1)C=C(C(=O)OCC)C(=O)OCC)C(=O)OCC	1.28	notB
0006358-37-8	Cc1ccc(cc1)NC(=O)C(C(=O)C)N=Nc1ccc(cc1Cl)c1ccc(c(c1)Cl)N=NC(C(=O)Nc1ccc(cc1)C)C(=O)C	0.49	notB
0006358-85-6	CC(=O)C(=NNc1ccc(cc1Cl)c1ccc(c(c1)Cl)NN=C(C(=O)Nc1ccccc1)C(=O)C)C(=O)Nc1ccccc1	0.576667	notB
0006362-80-7	C=C(c1ccccc1)CC(c1ccccc1)(C)C	3.58	B
0006425-39-4	O(CCN1CCOCC1)CCN1CCOCC1	0.48	notB
0006459-94-5	Cc1ccc(cc1)S(=O)(=O)Oc1ccc(cc1)N=Nc1ccc(cc1C)c1ccc(c(c1)C)NN=C1C(=O)C=Cc2c1c(cc(c2)S(=O)(=O)O)S(=O)(=O)O	1.84612	notB
0006639-30-1	Clc1cc(Cl)c(cc1C)Cl	3.50526	B
0006674-22-2	C1CCN2C(=NCCC2)CC1	0.08	notB
0006683-19-8	O=C(CCc1cc(c(c(c1)C(C)(C)C)O)C(C)(C)C)OCC(COC(=O)CCc1cc(c(c(c1)C(C)(C)C)O)C(C)(C)C)(COC(=O)CCc1cc(c(c(c1)C(C)(C)C)O)C(C)(C)C)COC(=O)CCc1cc(c(c(c1)C(C)(C)C)O)C(C)(C)C	-0.17	notB
0006731-36-8	CC1CC(C)(C)CC(C1)(OOC(C)(C)C)OOC(C)(C)C	4.00702	B
0006842-15-5	C=CCC=CCC=CCC=CC	3.40622	B
0006864-37-5	NC1CCC(CC1C)CC1CCC(C(C1)C)N	1.28	notB
0006936-40-9	COc1c(Cl)c(Cl)cc(c1Cl)Cl	3.69	B
0007012-37-5	Clc1ccc(cc1)c1ccc(cc1Cl)Cl	4.43	B
0007085-19-0	OC(=O)C(Oc1ccc(cc1C)Cl)C	0.48	notB
0007267-11-0	OC(=O)c1ccc(c2c1c(ccc2Cl)C(=O)O)Cl	1.09781	notB
0007287-19-6	CSc1nc(NC(C)C)nc(n1)NC(C)C	1.93	notB
0007299-99-2	CCCCC(C(=O)OCC(COC(=O)C(CCCC)CC)(COC(=O)C(CCCC)CC)COC(=O)C(CCCC)CC)CC	0.92	notB
0007379-51-3	CSc1c(C)cc(cc1C)O	1.16	notB
0007529-22-8	CN1(=O)CCOCC1	1	notB
0007580-85-0	OCCOC(C)(C)C	-0.22	notB
0007745-89-3	Nc1ccc(c(c1)Cl)C	1.88	notB
0007756-94-7	CC(=CC(CC(C)(C)C)(C)C)C	3.40643	B
0008001-35-2	ClCC1(CCl)C(=C)C2(C(C1(Cl)C(C2Cl)Cl)(Cl)Cl)Cl	4.05923	B
0010075-50-0	Brc1ccc2c(c1)cc[nH]2	2.98	notB
0010081-67-1	CC(c1ccccc1)(c1ccc(cc1)Nc1ccc(cc1)C(c1ccccc1)(C)C)C	1.925	notB
0010113-28-7	COP(=O)(Oc1ccccc1)OC	2.76	notB
0010161-33-8	O=C1CCC2=C3C=CC4(C(C3CCC2=C1)CCC4O)C	1.11	notB
0010315-98-7	CC(CN1CCOCC1)C	1.36534	notB
0010319-14-9	Oc1c(nc2c(c1Br)cccc2)C1C(=O)c2c(C1=O)cccc2	0.992988	notB
0010453-86-8	CC(=CC1C(C1(C)C)C(=O)OCc1coc(c1)Cc1ccccc1)C	3.55	B
0010461-98-0	N#CC(=C1CCCCC1)c1ccccc1	2.5	notB
0010496-18-1	CCCCCCCCCCSSCCCCCCCCCC	2	notB
0010541-83-0	CNc1ccc(cc1)C(=O)O	1.14241	notB
0010605-21-7	COC(=O)Nc1nc2c([nH]1)cccc2	0.664545	notB
0011096-82-5	Clc1cc(Cl)c(c(c1)Cl)c1c(Cl)cc(c(c1Cl)Cl)Cl	4.51833	B
0012002-48-1	Clc1c(Cl)cccc1Cl	2.94659	notB
0012122-67-7	SC(=S)NCCNC(=S)S	2.21	notB
0012217-77-5	Oc1ccc(c2c1C(=O)c1c(C2=O)c(ccc1O)N(=O)=O)Nc1ccccc1	2.31855	notB
0012674-11-2	Clc1cccc(c1)c1cc(Cl)cc(c1)Cl	4.02741	B
0013029-08-8	Clc1ccccc1c1ccccc1Cl	2.212	notB
0013049-38-2	CCc1cccc(c1)c1cccc(c1)CC	3.76	B
0013071-79-9	CCOP(=S)(SCSC(C)(C)C)OCC	2.14167	notB
0013116-53-5	ClCC(CCl)(Cl)Cl	1.77	notB
0013150-81-7	CCCCC(CCCC(C)C)C	3.18	notB
0013194-48-4	CCCSP(=O)(SCCC)OCC	0.896	notB
0013286-32-3	CCOP(=O)(OCC)SCc1ccccc1	1.03667	notB
0013358-11-7	CCCCC(CN1C(=O)C2C(C1=O)C1(CCC2(C)C=C1)C(C)C)CC	2.78305	notB
0013464-24-9	Oc1ccc(cc1)C(=C)CC(c1ccc(cc1)O)(C)C	1.59	notB
0013475-82-6	CC(CC(C)(C)C)CC(C)(C)C	3.1269	notB
0013540-50-6	Cc1ccc(c(c1)Cc1ccccc1)C	3.23702	notB
0013560-89-9	ClC1=C(Cl)C2(C(C1(Cl)C1C2CCC2C(CC1)C1(Cl)C(=C(C2(C1(Cl)Cl)Cl)Cl)Cl)(Cl)Cl)Cl	1.57	notB
0013654-09-6	Brc1c(c2c(Br)c(Br)c(c(c2Br)Br)Br)c(Br)c(c(c1Br)Br)Br	0.635	notB
0013674-84-5	ClCC(OP(=O)(OC(CCl)C)OC(CCl)C)C	0.519273	notB
0013674-87-8	ClCC(OP(=O)(OC(CCl)CCl)OC(CCl)CCl)CCl	1.22036	notB
0013936-21-5	CCCCCc1ccc2c(c1)C(=O)c1c(C2=O)cccc1	2.96527	notB
0013987-01-4	CCCC(CC(C)C)C	3.32	B
0014233-37-5	CC(Nc1ccc(c2c1C(=O)c1c(C2=O)cccc1)NC(C)C)C	3.85	B
0014802-03-0	CCCCC(COP(=O)(CC(CCCC)CC)O)CC	0.905	notB
0014816-18-3	CCOP(=S)(ON=C(c1ccccc1)C#N)OCC	2.95158	notB
0015046-75-0	Cc1ccccc1S(=O)(=O)O	-0.17	notB
0015087-24-8	O=C1C(=Cc2ccccc2)C2C(C1(C)CC2)(C)C	2.44857	notB
0015258-73-8	OCc1c(Cl)cccc1Cl	1.21915	notB
0015307-86-5	OC(=O)Cc1ccccc1Nc1c(Cl)cccc1Cl	1.92273	notB
0015782-05-5	OC(=O)c1cc2ccccc2c(c1O)N=Nc1cc(Cl)c(cc1S(=O)(=O)O)C	0.3	notB
0015862-07-4	Clc1cc(Cl)c(cc1c1ccccc1)Cl	3.99077	B
0015883-57-5	Oc1cc2ccc(cc2cc1S(=O)(=O)O)S(=O)(=O)O	1.17806	notB
0015968-05-5	Clc1cccc(c1c1c(Cl)cccc1Cl)Cl	4.0575	B
0015972-60-8	COCN(c1c(CC)cccc1CC)C(=O)CCl	1.39014	notB
0016090-02-1	OS(=O)(=O)c1cc(ccc1C=Cc1ccc(cc1S(=O)(=O)O)Nc1nc(Nc2ccccc2)nc(n1)N1CCOCC1)Nc1nc(Nc2ccccc2)nc(n1)N1CCOCC1	1.01536	notB
0016219-75-3	CC=C1CC2CC1C=C2	2.75513	notB
0016372-96-6	Brc1cc(Br)cc(c1)c1ccccc1	0.02	notB
0016400-50-3	Brc1cc(cc(c1)Br)c1cc(Br)cc(c1)Br	1.27667	notB
0016517-11-6	OC(=O)C(C(C(C(C(C(C(C(C(C(C(C(C(C(C(C(C(F)(F)F)(F)F)(F)F)(F)F)(F)F)(F)F)(F)F)(F)F)(F)F)(F)F)(F)F)(F)F)(F)F)(F)F)(F)F)(F)F)(F)F	2.67667	notB
0016605-91-7	Clc1c(Cl)cccc1c1ccccc1	3.92231	B
0016606-02-3	Clc1ccc(cc1)c1cc(Cl)ccc1Cl	3.98727	B
0016611-67-9	Clc1ccc(c(c1)C(=O)c1ccccc1)Cl	1.89	notB
0016766-29-3	COc1cc(Cl)c(c(c1OC)Cl)Cl	3.5	B
0016766-31-7	COc1cc(Cl)cc(c1O)Cl	1.74	notB
0017095-24-8	Nc1c2c(cc(c1N=Nc1ccc(cc1)S(=O)(=O)CCOS(=O)(=O)O)S(=O)(=O)O)cc(c(c2O)N=Nc1ccc(cc1)S(=O)(=O)CCOS(=O)(=O)O)S(=O)(=O)O	0.64	notB
0017109-49-8	CCOP(=O)(Sc1ccccc1)Sc1ccccc1	2.03392	notB
0017270-01-8	O=P(Oc1ccccc1)(Oc1ccccc1)Oc1ccc(cc1)c1ccc(cc1)OP(=O)(Oc1ccccc1)Oc1ccccc1	0.93	notB
0017302-11-3	CCCCCCC(CC)CC	3.32	B
0017348-59-3	CC(OC(C)(C)C)C	0.76	notB
0017700-09-3	O=N(=O)c1ccc(c(c1Cl)Cl)Cl	2.16035	notB
0017790-61-3	Clc1ccc(cc1)c1ccc(cc1)C(C)C	3.04	notB
0017804-35-2	CCCCNC(=O)n1c(NC(=O)OC)nc2c1cccc2	1.43	notB
0018181-70-9	COP(=S)(Oc1cc(Cl)c(cc1Cl)I)OC	2.60361	notB
0018259-05-7	Clc1c(c2ccccc2)c(Cl)c(c(c1Cl)Cl)Cl	4.85	B
0018375-66-1	CCCCCCCCCCCCCCCCCCNC(=O)C(C(C(C(CO)O)O)O)O	2.94	notB
0018708-70-8	Clc1cc(Cl)cc(c1N(=O)=O)Cl	2.52546	notB
0018854-01-8	CCOP(=S)(Oc1noc(c1)c1ccccc1)OCC	2.21808	notB
0019408-74-3	Clc1c(Cl)cc2c(c1Cl)Oc1c(O2)cc(c(c1Cl)Cl)Cl	3.92	B
0019666-30-9	CC(Oc1cc(c(cc1Cl)Cl)n1nc(oc1=O)C(C)(C)C)C	2.34393	notB
0019715-19-6	OC(=O)c1cc(cc(c1O)C(C)(C)C)C(C)(C)C	0.985	notB
0019780-74-6	CCCCC(CCC=C)CC	3.43	B
0019956-76-4	Cc1cc(c(c(c1O)C)C)c1cc(C)c(c(c1C)C)O	2.65	notB
0020020-02-4	Clc1c(Cl)c(Cl)c(c2c1cccc2)Cl	2.96851	notB
0020076-86-2	O=c1sc(C)c(c(c1c1ccccc1)O)C(=O)O	1.00359	notB
0020298-69-5	CC(=O)OC1CCCCC1C(C)(C)C	2.28	notB
0020367-35-5	CCCCOc1ccccc1OCCCC	2.925	notB
0020651-71-2	CCCCc1ccc(cc1)C(=O)O	0.88	notB
0020668-33-1	Cc1cc2ncccc2cc1C	1.1275	notB
0020749-68-2	Clc1c(Cl)c(Cl)c2c(c1Cl)C(=O)n1c2nc2c3c1cccc3ccc2	1.51	notB
0021087-64-9	CSc1nnc(c(=O)n1N)C(C)(C)C	1.76	notB
0021267-72-1	ClCC(=O)N(C(C#C)C)c1ccccc1	0.95	notB
0021348-16-3	OC(=O)C(Cl)(Cl)Cl	0.662228	notB
0021564-17-0	N#CSCSc1nc2c(s1)cccc2	1.90403	notB
0021609-90-5	COP(=S)(c1ccccc1)Oc1cc(Cl)c(cc1Cl)Br	3.26	notB
0021850-44-2	BrCC(COc1c(Br)cc(cc1Br)C(c1cc(Br)c(c(c1)Br)OCC(CBr)Br)(C)C)Br	1.80667	notB
0022094-93-5	Cc1ccc(c(c1)C)NC(=O)C(C(=O)C)N=Nc1cc(Cl)c(cc1Cl)c1cc(Cl)c(cc1Cl)N=NC(C(=O)Nc1ccc(cc1C)C)C(=O)C	0.49	notB
0022259-30-9	CNC(=O)Oc1cccc(c1)N=CN(C)C	0	notB
0022311-25-7	Brc1c(Br)ccc(c1Br)Br	3.18	notB
0022907-72-8	CC(C1CCC(CC1)C(C)C)C	3.5	B
0023135-22-0	CNC(=O)ON=C(C(=O)N(C)C)SC	0.3	notB
0023184-66-9	CCCCOCN(c1c(CC)cccc1CC)C(=O)CCl	1.55632	notB
0024019-05-4	Clc1ccc(c(c1)NC(=O)Nc1ccc(c(c1)Cl)Cl)Oc1ccc(cc1S(=O)(=O)O)Cl	2.26843	notB
0024423-11-8	Clc1ccc2c(c1)ccc1c2cccc1	3.63	B
0024800-44-0	OCC(OCC(OCC(O)C)C)C	0.23	notB
0025013-16-5	COc1ccc(c(c1)C(C)(C)C)O	1.29	notB
0025154-52-3	CCCCCCCCCc1ccccc1O	1.51113	notB
0025154-54-5	O=N(=O)c1ccccc1N(=O)=O	1.35293	notB
0025155-23-1	Cc1cc(cc(c1)C)OP(=O)(Oc1cc(C)cc(c1)C)Oc1cc(C)cc(c1)C	2.655	notB
0025155-30-0	CCCCCCCCCCCCc1ccc(cc1)S(=O)(=O)O	1.13071	notB
0025167-81-1	Clc1ccc(c(c1)Cl)O	1.99951	notB
0025265-76-3	Nc1ccccc1N	0.49	notB
0025291-17-2	C=CC(C(C(C(C(C(F)(F)F)(F)F)(F)F)(F)F)(F)F)(F)F	2.58	notB
0025311-71-1	CCOP(=S)(Oc1ccccc1C(=O)OC(C)C)NC(C)C	1.86784	notB
0025321-09-9	CC(c1ccc(cc1)C(C)C)C	3.31156	B
0025323-68-6	Clc1ccc(c(c1Cl)Cl)c1ccccc1	4.02341	B
0025339-17-7	OCCCCCCCC(C)C	2.51	notB
0025376-45-8	Nc1ccc(c(c1)N)C	1.41	notB
0025394-13-2	Nc1ccc(c(c1)S(=O)(=O)O)C=Cc1ccc(cc1S(=O)(=O)O)N	0.653333	notB
0025429-29-2	Clc1ccc(c(c1Cl)Cl)c1cccc(c1Cl)Cl	4.41644	B
0025485-88-5	O=C(c1ccccc1O)OC1CCCCC1	2.88	notB
0025637-99-4	BrC1CC(Br)CC(Br)CC(CC(CC(C1)Br)Br)Br	3.46333	B
0025638-17-9	CCCCc1ccc2c(c1S(=O)(=O)O)cccc2	-0.356	notB
0025640-71-5	CC(c1ccc(c(c1C(c1ccccc1)C)C(c1ccccc1)C)O)c1ccccc1	2.08333	notB
0025640-78-2	CC(c1ccccc1c1ccccc1)C	3.84	B
0025747-06-2	Clc1cc(NN=C2C=Cc3c(C2=O)cccc3O)c(c(c1)S(=O)(=O)O)O	0.58	notB
0025791-96-2	OCC(OC(COCC(OC(COCC(OCC(COCC(OCC(OC(COCC(OC(CO)C)C)C)C)C)O)C)C)C)C)C	0.595	notB
0025954-13-6	CCOP(=O)(C(=O)N)O	0	notB
0025973-55-1	CCC(c1cc(n2nc3c(n2)cccc3)c(c(c1)C(CC)(C)C)O)(C)C	3.205	notB
0026076-28-8	O=Nc1c(ccc2c1cccc2)O[Co](Oc1ccc2c(c1N=O)cccc2)Oc1ccc2c(c1N=O)cccc2	1.67667	notB
0026087-47-8	CC(OP(=O)(OC(C)C)SCc1ccccc1)C	1.80269	notB
0026140-60-3	c1ccc(cc1)c1ccc(cc1)c1ccccc1	1.99048	notB
0026234-46-8	O=C1C2C3C=CC(C2C(=O)N1c1ccccc1)C3	1.08	notB
0026259-45-0	CCNc1nc(NC(CC)C)nc(n1)OC	1.2	notB
0026306-61-6	Nc1ccc(cc1)Oc1c(Cl)cc(cc1Cl)Cl	2.586	notB
0026389-78-6	ClCCN(c1c(cc(cc1N(=O)=O)C)N(=O)=O)CCCl	1.62	notB
0026399-36-0	CCCN(c1c(cc(cc1N(=O)=O)C(F)(F)F)N(=O)=O)CC1CC1	1.59	notB
0026444-49-5	Cc1ccccc1OP(=O)(Oc1ccccc1)Oc1ccccc1	2.56806	notB
0026530-20-1	CCCCCCCCn1sccc1=O	2.51583	notB
0026545-58-4	OS(=O)(=O)c1c(ccc2c1cccc2)Cc1ccc2c(c1S(=O)(=O)O)cccc2	0.39254	notB
0026601-64-9	Clc1ccccc1c1c(Cl)c(Cl)c(c(c1Cl)Cl)Cl	3.93375	B
0026603-23-6	CCCCCCCCc1ccccc1Nc1ccccc1CCCCCCCC	0.846667	notB
0026630-87-5	CC(=O)OCCN(c1ccc(c(c1)NC(=O)c1ccccc1)N=Nc1nc2c(s1)cc(cc2)Cl)CCOC(=O)C	2.274	notB
0026761-40-0	CC(CCCCCCCOC(=O)c1ccccc1C(=O)OCCCCCCCC(C)C)C	1.08	notB
0026780-96-1	CC1=CC(C)(C)Nc2c1cccc2	2.94333	notB
0026787-65-5	CCCCCCCCCCCCCCCCCCCCCCCCCCCC(=O)OCCO	1.65058	notB
0026898-17-9	Cc1cccc(c1Cc1ccccc1)Cc1ccccc1	4.02097	B
0026914-33-0	Clc1ccc(c(c1)c1c(Cl)cccc1Cl)Cl	3.98717	B
0026967-76-0	CC(c1ccccc1OP(=O)(Oc1ccccc1C(C)C)Oc1ccccc1C(C)C)C	2.13286	notB
0027193-29-9	CC(C1CCCC2C1CCCC2)C	3.58	B
0027193-86-8	CCCCCCCCCCCCc1cccc(c1)O	2.87	notB
0027323-18-8	Clc1ccccc1c1ccccc1	5.2875	B
0027344-41-8	OS(=O)(=O)c1ccccc1C=Cc1ccc(cc1)c1ccc(cc1)C=Cc1ccccc1S(=O)(=O)O	0.46	notB
0027458-92-0	OCCCCCCCCCCC(C)C	2.73	notB
0027676-62-6	CC(c1cc(cc(c1O)C(C)(C)C)Cn1c(=O)n(Cc2cc(c(c(c2)C(C)(C)C)O)C(C)(C)C)c(=O)n(c1=O)Cc1cc(c(c(c1)C(C)(C)C)O)C(C)(C)C)(C)C	0.27	notB
0028076-73-5	Clc1ccc(c(c1)Cl)Oc1ccc(cc1Cl)Cl	4.14	B
0028106-30-1	C=Cc1ccccc1CC	2.70324	notB
0028249-77-6	CCN(C(=O)SCc1ccc(cc1)Cl)CC	2.17334	notB
0028299-29-8	CCCCCCCCCCCCCCCCC=CC(C(=O)O)CC(=O)O	0.04	notB
0028299-41-4	Cc1ccccc1Oc1ccccc1C	2.52	notB
0028519-02-0	CCCCCCCCCCCCc1c(cccc1S(=O)(=O)O)Oc1ccccc1S(=O)(=O)O	0.835	notB
0028575-17-9	CCc1ccc(cc1)c1ccc(cc1)CC	3.42449	B
0028680-44-6	ClC1=C(Cl)C2(CC1(Cl)C(=C2Cl)Cl)Cl	3.81	B
0028680-45-7	ClC1C2(Cl)C=CC1(Cl)C(C2(Cl)Cl)(Cl)Cl	3.58307	B
0028984-87-4	c1ccc(cc1)c1ccc(cc1)Oc1ccc(cc1)c1ccccc1	3.14	notB
0029082-74-4	ClC(=C(c1c(Cl)c(Cl)c(c(c1Cl)Cl)Cl)Cl)Cl	3.28562	notB
0029091-05-2	CCN(c1c(cc(c(c1N(=O)=O)N)C(F)(F)F)N(=O)=O)CC	2.025	notB
0029253-36-9	CC(c1cccc2c1cccc2)C	2.86459	notB
0029446-15-9	Clc1cc2Oc3ccccc3Oc2cc1Cl	2.88	notB
0029598-76-3	CCCCCCCCCCCCSCCC(=O)OCC(COC(=O)CCSCCCCCCCCCCCC)(COC(=O)CCSCCCCCCCCCCCC)COC(=O)CCSCCCCCCCCCCCC	1.385	notB
0029761-21-5	CC(CCCCCCCOP(=O)(Oc1ccccc1)Oc1ccccc1)C	2.46872	notB
0030171-80-3	BrC(c1ccccc1OCC1CO1)Br	0.61	notB
0030560-19-1	COP(=O)(NC(=O)C)SC	-1.3475	notB
0030746-58-8	Clc1c2Oc3ccccc3Oc2c(c(c1Cl)Cl)Cl	3.17	notB
0031508-00-6	Clc1cc(Cl)c(cc1c1ccc(c(c1)Cl)Cl)Cl	4.585	B
0031604-28-1	Clc1cc(Cl)c2c(c1)c(Cl)ccc2Cl	4.4	B
0031775-20-9	CCOc1ccc(cc1)NC(=O)C(C(=O)C)N=Nc1ccc(cc1Cl)c1ccc(c(c1)Cl)N=NC(C(=O)Nc1ccc(cc1)OCC)C(=O)C	0.49	notB
0032388-55-9	CC(=O)C1=C(C)C2CC3(C1)C(C)CCC3C2(C)C	2.9	notB
0032588-76-4	O=C1N(CCN2C(=O)c3c(C2=O)c(Br)c(c(c3Br)Br)Br)C(=O)c2c1c(Br)c(c(c2Br)Br)Br	0.26	notB
0032598-10-0	Clc1ccc(c(c1)Cl)c1ccc(c(c1)Cl)Cl	4.635	B
0032598-11-1	Clc1ccc(c(c1)c1ccc(c(c1)Cl)Cl)Cl	4.462	B
0032598-13-3	Clc1cc(cc(c1)Cl)c1cc(Cl)cc(c1)Cl	2.93208	notB
0032598-14-4	Clc1ccc(cc1Cl)c1ccc(c(c1Cl)Cl)Cl	4.565	B
0032669-06-0	ClCCOC(c1ccccc1)c1ccccc1	2.55437	notB
0032690-93-0	Clc1ccc(cc1)c1cc(Cl)c(cc1Cl)Cl	4.6	B
0032774-16-6	Clc1cc(cc(c1Cl)Cl)c1cc(Cl)c(c(c1)Cl)Cl	5.22	B
0032861-85-1	COc1cc(ccc1N(=O)=O)Oc1ccc(cc1Cl)Cl	3.0185	notB
0033025-41-1	Clc1ccc(cc1)c1ccc(c(c1Cl)Cl)Cl	4.58	B
0033027-68-8	FP1(=NP(=NP(=N1)(F)F)(F)F)Oc1ccccc1	1.71	notB
0033089-61-1	CN(C=Nc1ccc(cc1C)C)C=Nc1ccc(cc1C)C	3.26	notB
0033245-39-5	CCCN(c1c(cc(cc1N(=O)=O)C(F)(F)F)N(=O)=O)CCCl	1.51	notB
0033284-50-3	Clc1ccc(c(c1)Cl)c1ccccc1	3.55	B
0033284-52-5	Clc1cc(cc(c1)Cl)c1cc(Cl)cc(c1)Cl	3.01692	notB
0033284-53-6	Clc1cc(c2ccccc2)c(c(c1Cl)Cl)Cl	4.39	B
0033284-54-7	Clc1cc(Cl)c(c(c1Cl)c1ccccc1)Cl	1.36571	notB
0033423-92-6	Clc1cc(Cl)c2c(c1)Oc1c(O2)cc(cc1Cl)Cl	3.166	notB
0033576-92-0	COP(=S)(Oc1ccccc1)OC	1.89	notB
0033629-47-9	CCC(Nc1c(cc(cc1N(=O)=O)C(C)(C)C)N(=O)=O)C	2.15	notB
0033704-61-9	O=C1CCCC2=C1C(C)(C)C(C2(C)C)C	2.02	notB
0033857-26-0	Clc1ccc2c(c1)Oc1c(O2)cc(cc1)Cl	2.37	notB
0033979-03-2	Clc1cc(Cl)cc(c1c1c(Cl)cc(cc1Cl)Cl)Cl	3.03571	notB
0034335-10-9	OP(=O)(c1ccccc1)O	1.42	notB
0034364-42-6	O=P(Oc1ccccc1C(c1ccccc1)(C)C)(Oc1ccccc1)Oc1ccccc1	3.45	B
0034643-46-4	CCCSP(=S)(Oc1ccc(cc1Cl)Cl)OCC	2.55789	notB
0034883-39-1	Clc1ccc(c(c1)c1ccccc1)Cl	4.0696	B
0034883-41-5	Clc1cc(Cl)cc(c1)c1ccccc1	3.34918	B
0034883-43-7	Clc1ccc(cc1)c1ccccc1Cl	3.69	B
0035065-27-1	Clc1cc(Cl)c(cc1c1cc(Cl)c(cc1Cl)Cl)Cl	4.34188	B
0035065-28-2	Clc1cc(Cl)c(cc1c1ccc(c(c1Cl)Cl)Cl)Cl	5.435	B
0035065-29-3	Clc1cc(Cl)c(cc1c1cc(Cl)c(c(c1Cl)Cl)Cl)Cl	3.53333	B
0035367-38-5	O=C(NC(=O)c1c(F)cccc1F)Nc1ccc(cc1)Cl	1.89778	notB
0035554-44-0	C=CCOC(c1ccc(cc1Cl)Cl)Cn1cncc1	1.805	notB
0035693-92-6	Clc1cc(Cl)c(c(c1)Cl)c1ccccc1	3.93	B
0035693-99-3	Clc1ccc(cc1c1cc(Cl)ccc1Cl)Cl	3.32483	B
0035694-06-5	Clc1ccc(c(c1)Cl)c1cc(Cl)c(c(c1Cl)Cl)Cl	3.995	B
0035694-08-7	Clc1cc(c(c(c1Cl)Cl)Cl)c1cc(Cl)c(c(c1Cl)Cl)Cl	5.052	B
0035822-46-9	Clc1c(Cl)cc2c(c1Cl)Oc1c(O2)c(Cl)c(c(c1Cl)Cl)Cl	3.5225	B
0035860-37-8	CC(c1cc(C(C)C)c2c(c1)c(ccc2)C(C)C)C	3.52855	B
0036065-30-2	BrCC(COc1c(Br)cc(cc1Br)Br)(Br)C	4.33912	B
0036335-67-8	CCOP(=S)(Oc1cc(C)ccc1N(=O)=O)NC(CC)C	2.05555	notB
0036355-01-8	Brc1cc(Br)cc(c1c1c(Br)cc(cc1Br)Br)Br	3.48549	B
0036437-37-3	CCC(c1cc(cc(c1O)n1nc2c(n1)cccc2)C(C)(C)C)C	4.075	B
0036483-60-0	Brc1cc(Oc2ccc(c(c2Br)Br)Br)c(c(c1)Br)Br	3.145	notB
0036559-22-5	Clc1ccc(c(c1)Cl)c1cccc(c1Cl)Cl	4.535	B
0036653-82-4	CCCCCCCCCCCCCCCCO	3.04	notB
0036734-19-7	CC(NC(=O)N1CC(=O)N(C1=O)c1cc(Cl)cc(c1)Cl)C	2.01923	notB
0037372-50-2	Nc1ccc(c(c1)N)N=Nc1ccc(cc1C)c1ccc(c(c1)C)N=Nc1c(N)c2c(cc1S(=O)(=O)O)cc(c(c2O)N=Nc1ccccc1)S(=O)(=O)O	1.3527	notB
0037680-65-2	Clc1ccc(c(c1)c1ccccc1Cl)Cl	3.2992	notB
0037680-66-3	Clc1ccc(c(c1)Cl)c1ccccc1Cl	4.37	B
0037680-73-2	Clc1ccc(c(c1)c1cc(Cl)c(cc1Cl)Cl)Cl	3.80692	B
0037853-59-1	Brc1cc(Br)cc(c1OCCOc1c(Br)cc(cc1Br)Br)Br	1.29313	notB
0038379-99-6	Clc1ccc(c(c1)c1c(Cl)ccc(c1Cl)Cl)Cl	4.78	B
0038380-01-7	Clc1ccc(c(c1)Cl)c1cc(Cl)c(cc1Cl)Cl	4.86	B
0038380-02-8	Clc1ccc(c(c1)c1ccc(c(c1Cl)Cl)Cl)Cl	4.86833	B
0038380-03-9	Clc1cc(ccc1Cl)c1c(Cl)ccc(c1Cl)Cl	5.035	B
0038380-04-0	Clc1cc(Cl)c(cc1c1c(Cl)ccc(c1Cl)Cl)Cl	5.08	B
0038380-05-1	Clc1ccc(c(c1Cl)Cl)c1c(Cl)ccc(c1Cl)Cl	4.88	B
0038380-07-3	Clc1c(ccc(c1Cl)Cl)c1ccc(c(c1Cl)Cl)Cl	4.84667	B
0038380-08-4	Clc1ccc(cc1Cl)c1cc(Cl)c(c(c1Cl)Cl)Cl	5.88	B
0038411-22-2	Clc1ccc(c(c1c1c(Cl)ccc(c1Cl)Cl)Cl)Cl	4.7625	B
0038411-25-5	Clc1c(Cl)cc(c(c1Cl)Cl)c1c(Cl)ccc(c1Cl)Cl	5.705	B
0038444-77-8	Clc1cccc(c1c1ccc(cc1)Cl)Cl	5.08	B
0038444-85-8	Clc1ccc(cc1)c1cccc(c1Cl)Cl	4.47	B
0038444-86-9	Clc1cc(ccc1Cl)c1ccccc1Cl	4.36	B
0038444-90-5	Clc1ccc(cc1)c1ccc(c(c1)Cl)Cl	4.58	B
0038444-93-8	Clc1c(Cl)cccc1c1cccc(c1Cl)Cl	3.16855	notB
0038638-05-0	CCCCCCC(c1ccccc1OP(=O)(Oc1ccccc1)Oc1ccccc1)C	2.84	notB
0038640-62-9	CC(c1c(ccc2c1cccc2)C(C)C)C	3.41188	B
0038964-22-6	Clc1ccc2c(c1)Oc1c(O2)ccc(c1)Cl	2.82	notB
0039001-02-0	Clc1c(Cl)c(Cl)c2c(c1Cl)oc1c2c(Cl)c(c(c1Cl)Cl)Cl	3.092	notB
0039227-28-6	Clc1cc2Oc3c(Oc2cc1Cl)c(Cl)c(c(c3Cl)Cl)Cl	3.4425	B
0039227-58-2	Clc1c(Cl)cc(c2c1Oc1ccccc1O2)Cl	2.75167	notB
0039227-61-7	Clc1ccc2c(c1)Oc1c(O2)c(Cl)c(c(c1Cl)Cl)Cl	3.1075	notB
0039485-83-1	Clc1ccc(c(c1)Cl)c1c(Cl)cc(cc1Cl)Cl	3.4	B
0039569-21-6	Clc1c(C)c(Br)c(c(c1Br)Br)Br	3.98	B
0039801-14-4	ClC12C3C4(C(C1(Cl)Cl)(C1(C2(C3(Cl)C(C41Cl)(Cl)Cl)Cl)Cl)Cl)Cl	4.55	B
0040036-79-1	CCCCCCCCCCCCCCOCCOCCOCCOCCOCCOCCOCCO	2.876	notB
0040186-71-8	Clc1cc(Cl)c(c(c1Cl)Cl)c1c(Cl)c(Cl)cc(c1Cl)Cl	5.29	B
0040186-72-9	Clc1cc(c(c(c1Cl)Cl)Cl)c1c(Cl)c(Cl)c(c(c1Cl)Cl)Cl	5.07	B
0040321-76-4	Clc1cc2Oc3c(Oc2cc1Cl)cc(c(c3Cl)Cl)Cl	4.38	B
0040690-89-9	N#CCCN(c1ccc(cc1)N=Nc1ccc(cc1)N(=O)=O)CCOC(=O)c1ccccc1	0.962138	notB
0040766-31-2	CC(c1cccc(c1C)C)c1ccccc1	3.44	B
0041122-70-7	CCCCCCc1ccc(cc1)c1ccc(cc1)C#N	3.5874	B
0041198-08-7	CCCSP(=O)(Oc1ccc(cc1Cl)Br)OCC	1.96	notB
0041464-39-5	Clc1ccc(c(c1)c1cccc(c1Cl)Cl)Cl	4.2425	B
0041464-40-8	Clc1ccc(c(c1)Cl)c1cc(Cl)ccc1Cl	4.33	B
0041464-42-0	Clc1cc(Cl)cc(c1)c1cc(Cl)ccc1Cl	4.85	B
0041464-51-1	Clc1cc(Cl)c(cc1c1cccc(c1Cl)Cl)Cl	4.6975	B
0041611-76-1	CCc1cccc(c1Nc1ccc(c2c1C(=O)c1c(C2=O)cccc1)Nc1c(C)cccc1CC)C	0.54	notB
0042240-73-3	Clc1c(ccc(c1Cl)N)Cc1ccc(c(c1Cl)Cl)N	3.23125	notB
0042615-29-2	CCCCCCCCCCC(c1ccc(cc1)S(=O)(=O)O)C	2.31067	notB
0046382-54-1	OC(=O)C1CC2CC1C1C2C2CC1C=C2	1.72	notB
0047377-16-2	CCCCCCCCCCCCCCc1ccc(cc1)S(=O)(=O)O	0.52	notB
0049562-28-9	CC(OC(=O)C(Oc1ccc(cc1)C(=O)c1ccc(cc1)Cl)(C)C)C	1.72538	notB
0050375-10-5	COc1c(Cl)ccc(c1Cl)Cl	2.52519	notB
0050512-35-1	CC(OC(=O)C(=C1SCCS1)C(=O)OC(C)C)C	2.03654	notB
0050853-70-8	OC(=O)C1C2CC(C1C(=O)O)C=C2C	0.95	notB
0050876-32-9	CC1CC(C)CC(C1)(C)C	3.65	B
0050925-42-3	OCCNc1nc(nc(n1)Nc1ccc(cc1C)N=Nc1cc2c(c(c1)S(=O)(=O)O)cccc2S(=O)(=O)O)Nc1ccc(cc1C)N=Nc1cc2c(c(c1)S(=O)(=O)O)cccc2S(=O)(=O)O	0.5	notB
0051207-31-9	Clc1cc2c(cc1Cl)oc1c2cc(Cl)c(c1)Cl	3.56484	B
0051630-58-1	N#CC(c1cccc(c1)Oc1ccccc1)OC(=O)C(c1ccc(cc1)Cl)C(C)C	2.78727	notB
0051892-26-3	Clc1ccc(c(c1)Cl)Oc1ccccc1	3.97	B
0051908-16-8	Clc1cc(Cl)c(c(c1)c1cc(Cl)c(cc1Cl)Cl)Cl	5.31	B
0052184-14-2	O=N(=O)c1ccccc1N=Nc1cc(cc(c1O)C(C)(C)C)C(C)(C)C	3.685	B
0052186-00-2	ClCC(OP(=O)(OC(CCl)C)OCCOCCOP(=O)(OC(CCl)C)OC(CCl)C)C	0.025	notB
0052207-48-4	CN(C(CSS(=O)(=O)O)CSS(=O)(=O)O)C	-0.123333	notB
0052303-69-2	CC(OC(=O)C(=C1SCCS1=O)C(=O)OC(C)C)C	0.0802022	notB
0052322-80-2	Clc1cc(Cl)c(cc1Oc1ccccc1)Cl	3.24365	notB
0052591-27-2	C=CC(=O)OCCC(C(C(C(F)(F)F)(F)F)(F)F)(F)F	1.72	notB
0052663-58-8	Clc1ccc(cc1)c1c(Cl)ccc(c1Cl)Cl	5.19	B
0052663-60-2	Clc1c(Cl)cccc1c1c(Cl)ccc(c1Cl)Cl	5.15	B
0052663-61-3	Clc1ccc(c(c1)c1cc(Cl)cc(c1Cl)Cl)Cl	5.27	B
0052663-63-5	Clc1ccc(c(c1)c1c(Cl)c(Cl)cc(c1Cl)Cl)Cl	5.15	B
0052663-69-1	Clc1cc(Cl)c(cc1c1c(Cl)cc(c(c1Cl)Cl)Cl)Cl	5.3125	B
0052663-70-4	Clc1ccc(c(c1Cl)Cl)c1c(Cl)c(Cl)cc(c1Cl)Cl	5.26	B
0052663-78-2	Clc1ccc(c(c1Cl)Cl)c1c(Cl)c(Cl)c(c(c1Cl)Cl)Cl	5.35667	B
0052712-04-6	Clc1ccc(c(c1)c1cc(Cl)c(c(c1Cl)Cl)Cl)Cl	5.3225	B
0052712-05-7	Clc1ccc(c(c1)c1c(Cl)c(Cl)c(c(c1Cl)Cl)Cl)Cl	5.27667	B
0052744-13-5	Clc1cc(Cl)c(c(c1)c1c(Cl)ccc(c1Cl)Cl)Cl	5.54	B
0052789-62-5	Oc1cccc2c1c(N)c(cc2S(=O)(=O)O)S(=O)(=O)O	1.39143	notB
0052918-63-5	N#CC(c1cccc(c1)Oc1ccccc1)OC(=O)C1C(C1(C)C)C=C(Br)Br	2.59403	notB
0053469-21-9	Clc1ccc(c(c1)Cl)c1cccc(c1Cl)Cl	4.3025	B
0053555-64-9	Clc1cc(Cl)c2c(c1)c(Cl)cc(c2)Cl	4.53	B
0053826-12-3	OC(=O)CC(C(C(C(C(C(F)(F)F)(F)F)(F)F)(F)F)(F)F)(F)F	1.08	notB
0054135-80-7	COc1ccc(c(c1Cl)Cl)Cl	3.2997	notB
0054135-81-8	OCc1cc(Cl)cc(c1Cl)Cl	3.07703	notB
0054135-82-9	COc1cc(Cl)c(c(c1)Cl)Cl	3.09	notB
0054352-93-1	CC(C1CCC2C(C1)CCCC2)C	3.81	B
0054910-89-3	CNCCC(c1ccccc1)Oc1ccc(cc1)C(F)(F)F	2.07308	notB
0055250-84-5	CN(c1ccc2c(c1)Oc1c(C32OC(=O)c2c3cccc2)cc(c(c1)C)Nc1ccccc1)C1CCCCC1	3.47	B
0055335-06-3	OC(=O)COc1nc(Cl)c(cc1Cl)Cl	-0.91	notB
0055720-37-1	Clc1cc(Cl)c2c(c1)ccc(c2)Cl	4.43	B
0056113-42-9	NC(=O)c1c(C(=O)O)c(Cl)c(c(c1Cl)Cl)Cl	1.05714	notB
0056348-72-2	Clc1ccc(cc1Cl)Oc1ccc(c(c1)Cl)Cl	4.16629	B
0056558-16-8	Clc1cc(Cl)c(c(c1)Cl)c1c(Cl)cccc1Cl	4.81	B
0056558-17-9	Clc1cc(Cl)c(c(c1)Cl)c1ccc(c(c1)Cl)Cl	4.81	B
0056773-42-3	FC(C(C(C(C(S(=O)(=O)O)(F)F)(F)F)(F)F)(F)F)(C(C(C(F)(F)F)(F)F)(F)F)F	2.93	notB
0056803-37-3	O=P(Oc1ccccc1C(C)(C)C)(Oc1ccccc1)Oc1ccccc1	3.09571	notB
0057018-04-9	COP(=S)(Oc1c(Cl)cc(cc1Cl)C)OC	2.4934	notB
0057055-39-7	COC(=O)C1(Cl)C(Cl)CCC2(C1CCc1c2ccc(c1)C(C)C)C	2.03802	notB
0057057-83-7	COc1c(O)cc(c(c1Cl)Cl)Cl	2.005	notB
0057117-31-4	Clc1cc2c(cc1Cl)oc1c2cc(Cl)c(c1Cl)Cl	4.08	B
0057117-39-2	Clc1cc2c(cc1Cl)oc1c2ccc(c1Cl)Cl	2.72	notB
0057117-41-6	Clc1cc2c(cc1Cl)oc1c2c(Cl)c(c(c1)Cl)Cl	3.58	B
0057117-43-8	Clc1ccc2c(c1Cl)oc1c2cc(c(c1Cl)Cl)Cl	3.57	B
0057117-44-9	Clc1cc2c(c(c1Cl)Cl)oc1c2c(Cl)c(c(c1)Cl)Cl	3.94	B
0057160-47-1	O=C(NC(=O)c1ccccc1Cl)Nc1ccc(cc1)Cl	1.825	notB
0057465-28-8	Clc1ccc(cc1Cl)c1cc(Cl)c(c(c1)Cl)Cl	4.24556	B
0057567-84-7	CC1CCC(C(C1)C(=O)O)C(=O)O	0.647143	notB
0057653-85-7	Clc1c(Cl)cc2c(c1Cl)Oc1c(O2)c(Cl)c(c(c1)Cl)Cl	3.22	notB
0058011-68-0	Cc1ccc(cc1)S(=O)(=O)Oc1n(C)nc(c1C(=O)c1ccc(cc1Cl)Cl)C	0.765	notB
0058567-11-6	CCOCOC1CCCCCCCCCCC1	2.74	notB
0059039-21-3	Clc1ccc(cc1)Oc1ccc(cc1Cl)Cl	3.79	B
0059080-33-0	Brc1cc(Br)c(c(c1)Br)c1ccccc1	3.57323	B
0059080-37-4	Brc1ccc(cc1c1cc(Br)ccc1Br)Br	4.31823	B
0059365-60-5	OCC(c1ccccc1Cl)O	0.810801	notB
0059722-76-8	Brc1ccc(cc1)Oc1cc(O)c2c(c1N)C(=O)c1c(C2=O)cccc1	2.00366	notB
0059756-60-4	Cn1cc(c2cccc(c2)C(F)(F)F)c(=O)c(c1)c1ccccc1	0.706071	notB
0060123-64-0	Clc1ccc(c(c1)Cl)Oc1cc(Cl)c(cc1Cl)Cl	4.21	B
0060123-65-1	Clc1cc(Cl)c(cc1Oc1ccc(c(c1)Cl)Cl)Cl	4.08	B
0060145-21-3	Clc1ccc(c(c1)c1c(Cl)cc(cc1Cl)Cl)Cl	4.58	B
0060207-90-1	CCCC1COC(O1)(Cn1cncn1)c1ccc(cc1Cl)Cl	1.27556	notB
0060628-17-3	CCCCCCCCCCCCCOP(Oc1ccccc1)Oc1ccccc1	1.945	notB
0060851-34-5	Clc1cc2c(c(c1Cl)Cl)oc1c2cc(Cl)c(c1Cl)Cl	3.98	B
0061328-45-8	Clc1ccc(cc1)Oc1cc(Cl)c(cc1Cl)Cl	4.11	B
0061328-46-9	Clc1ccc(c(c1)Cl)Oc1ccc(c(c1)Cl)Cl	4.24	B
0061391-87-5	CCOC(=O)C(c1ccccc1)SP(=S)(OC)OC	3.23512	notB
0061788-32-7	C1=CCC(CC1)c1ccc(cc1)C1CCCC=C1	4.17	B
0061788-76-9	CCCC(CCC(CC(C(CCC(CCC(C(CC(Cl)C)Cl)Cl)Cl)Cl)Cl)Cl)Cl	1.845	notB
0061790-13-4	CCC1CCC(C1)CCC(=O)O	0.875	notB
0061949-76-6	ClC(=CC1C(C1(C)C)C(=O)OCc1cccc(c1)Oc1ccccc1)Cl	2.44464	notB
0061968-28-3	CCCCOCCN1C(O)c2c(C1=N)c(N)c1c(c2N)C(=O)c2c(C1=O)cccc2	1.34378	notB
0061968-52-3	CCC(=O)Nc1cc(ccc1N=Nc1ccc(cc1Cl)N(=O)=O)N(CCOC(=O)C)CCOC(=O)C	0.951557	notB
0062338-09-4	CCCCCCCC(C(C)(C)C)C	3.34	B
0062615-08-1	Clc1cc2c(c(c1Cl)Cl)oc1c2cccc1Cl	3.11	notB
0062796-65-0	Clc1cc(Cl)c(c(c1)Cl)c1ccccc1Cl	3.41667	B
0063428-00-2	CCCCCCCCCCCCc1ccc(cc1)Oc1cc(ccc1S(=O)(=O)O)S(=O)(=O)O	1.1	notB
0064700-56-7	CCCCOCCOC(=O)COc1nc(Cl)c(cc1Cl)Cl	0.72	notB
0065281-76-7	CC(c1ccc2c(c1Cl)CCC1C2(C)CCCC1(C)C(=O)O)C	1.5937	notB
0065310-45-4	CC(c1cc2CCC3C(c2cc1Cl)(C)CCCC3(C)C(=O)O)C	1.82472	notB
0066108-37-0	ClCC(OP(=O)(OC(CCl)CCl)OCC(CBr)(CBr)CCl)CCl	2.56615	notB
0066215-27-8	Nc1nc(NC2CC2)nc(n1)N	0	notB
0066246-88-6	CCCC(c1ccc(cc1Cl)Cl)Cn1cncn1	1.97	notB
0066332-96-5	CC(Oc1cccc(c1)NC(=O)c1ccccc1C(F)(F)F)C	1.45837	notB
0066735-04-4	CC(C(=O)O)Cc1ccc(cc1)C(C)(C)C	1.26772	notB
0066841-25-6	N#CC(c1cccc(c1)Oc1ccccc1)OC(=O)C1C(C1(C)C)C(C(Br)(Br)Br)Br	2.47	notB
0067028-18-6	Clc1ccc2c(c1)Oc1c(O2)c(Cl)c(c(c1)Cl)Cl	3.23667	notB
0067306-00-7	CC(Cc1ccc(cc1)C(C)(C)C)CN1CCCCC1	2.2	notB
0067375-30-8	N#CC(c1cccc(c1)Oc1ccccc1)OC(=O)C1C(C1(C)C)C=C(Cl)Cl	2.34422	notB
0067562-39-4	Clc1cc2c(c(c1Cl)Cl)oc1c2c(Cl)c(c(c1Cl)Cl)Cl	3.535	B
0067564-91-4	CC(Cc1ccc(cc1)C(C)(C)C)CN1CC(C)OC(C1)C	3.03	notB
0067905-19-5	OC(=O)C(C(C(C(C(C(C(C(C(C(C(C(C(C(C(F)(F)F)(F)F)(F)F)(F)F)(F)F)(F)F)(F)F)(F)F)(F)F)(F)F)(F)F)(F)F)(F)F)(F)F)(F)F	3.75	B
0068085-85-8	N#CC(c1cccc(c1)Oc1ccccc1)OC(=O)C1C(C1(C)C)C=C(C(F)(F)F)Cl	2.97	notB
0068194-05-8	Clc1ccc(c(c1)Cl)c1c(Cl)ccc(c1Cl)Cl	4.18	B
0068194-17-2	Clc1cc(Cl)c(c(c1)c1c(Cl)c(Cl)c(c(c1Cl)Cl)Cl)Cl	5.37333	B
0069806-40-2	COC(=O)C(Oc1ccc(cc1)Oc1ncc(cc1Cl)C(F)(F)F)C	1.23	notB
0070124-77-5	N#CC(c1cccc(c1)Oc1ccccc1)OC(=O)C(c1ccc(cc1)OC(F)F)C(C)C	3.43	B
0070288-86-7	COC1CC(OC2C(C)C=CC=C3COC4C3(O)C(C=C(C4O)C)C(=O)OC3CC(CC=C2C)OC2(C3)CCC(C(O2)C(CC)C)C)OC(C1OC1CC(OC)C(C(O1)C)O)C	1.70667	notB
0070362-47-9	Clc1cc(Cl)c(cc1c1ccccc1Cl)Cl	5	B
0070648-26-9	Clc1cc2c(cc1Cl)oc1c2c(Cl)c(c(c1Cl)Cl)Cl	3.9	B
0071048-82-3	CC=CC(=O)C1C(C)C=CCC1(C)C	2.14	notB
0071751-41-2	COC1CC(OC2C(C)C=CC=C3COC4C3(O)C(C=C(C4O)C)C(=O)OC3CC(CC=C2C)OC2(C3)C=CC(C(O2)C(CC)C)C)OC(C1OC1CC(OC)C(C(O1)C)O)C	3.115	notB
0071767-67-4	N#CCCN(c1ccc(cc1)N=Nc1c(Cl)cc(cc1Cl)N(=O)=O)CCC#N	1.41946	notB
0072416-87-6	Brc1ccc(cc1)c1cc(Br)cc(c1)Br	1.24	notB
0074051-80-2	CCSC(CC1CC(=O)C(C(=O)C1)C(=NOCC)CCC)C	0.51	notB
0074338-50-4	CC(c1ccc(cc1)c1cc(Cl)cc(c1)Cl)C	3.04	notB
0074918-40-4	Clc1ccc2c(c1)oc1c2cccc1Cl	3.01	notB
0075627-02-0	Clc1cc(Cl)c2c(c1Cl)oc1c2c(Cl)c(cc1Cl)Cl	2.96	notB
0076330-06-8	COc1c(O)c(OC)c(c(c1Cl)C=O)Cl	4.36333	B
0076738-62-0	OC(C(C)(C)C)C(n1ncnc1)Cc1ccc(cc1)Cl	1.54545	notB
0077501-63-4	CCOC(=O)C(OC(=O)c1cc(ccc1N(=O)=O)Oc1ccc(cc1Cl)C(F)(F)F)C	2.48	notB
0079060-60-9	Clc1ccc2c(c1Cl)oc1c2c(Cl)c(c(c1Cl)Cl)Cl	2.78	notB
0079277-27-3	COc1nc(nc(n1)C)NC(=O)NS(=O)(=O)c1ccsc1C(=O)OC	-0.1	notB
0079538-32-2	O=C(C1C(C1(C)C)C=C(C(F)(F)F)Cl)OCc1c(F)c(F)c(c(c1F)F)C	3.48	B
0079617-96-2	CNC1CCC(c2c1cccc2)c1ccc(c(c1)Cl)Cl	2.62	notB
0079755-43-4	Brc1ccc(c(c1)Br)Oc1c(O)cc(cc1Br)Br	1.17	notB
0079983-71-4	CCCCC(c1ccc(cc1Cl)Cl)(Cn1cncn1)O	1.61	notB
0080793-17-5	CCC(C(C(C(C(C(F)(F)F)(F)F)(F)F)(F)F)(F)F)(F)F	3.41	B
0080844-07-1	CCOc1ccc(cc1)C(COCc1cccc(c1)Oc1ccccc1)(C)C	3.6	B
0081335-77-5	CCc1cnc(c(c1)C(=O)O)C1=NC(=O)C(N1)(C)C(C)C	0.2	notB
0082097-50-5	ClCCOc1ccccc1S(=O)(=O)NC(=O)Nc1nc(C)nc(n1)OC	0.11	notB
0082657-04-3	O=C(C1C(C1(C)C)C=C(C(F)(F)F)Cl)OCc1cccc(c1C)c1ccccc1	2.645	notB
0083055-99-6	COc1nc(nc(c1)OC)NC(=O)NS(=O)(=O)Cc1ccccc1C(=O)OC	0.2	notB
0083704-22-7	Clc1ccc2c(c1)oc1c2c(Cl)c(c(c1)Cl)Cl	3.41	B
0084087-01-4	Clc1cnc2c(c1)ccc(c2C(=O)O)Cl	-0.1	notB
0084852-15-3	CC(CCCCCCc1ccc(cc1)O)C	2.56884	notB
0085954-11-6	Cc1cc(cc(c1OCC1OC1)C)c1cc(C)c(c(c1)C)OCC1OC1	0.92	notB
0090268-23-8	COc1ccc(cc1)NC(=O)C(C(=O)C)N=Nc1ccc(cc1Cl)c1ccc(c(c1)Cl)N=NC(C(=O)Nc1ccccc1)C(=O)C	0.49	notB
0090268-24-9	COc1cc(Cl)c(cc1NC(=O)C(C(=O)C)N=Nc1ccc(cc1Cl)c1ccc(c(c1)Cl)N=NC(C(=O)Nc1ccc(cc1C)C)C(=O)C)OC	0.49	notB
0092296-04-3	O=C(C(Br)C)Nc1c(C)n(n(c1=O)c1ccccc1)C	-0.2	notB
0092341-06-5	Clc1cc(Cl)c2c(c1Cl)oc1c2c(Cl)c(c(c1)Cl)Cl	3.2	notB
0095737-68-1	CC(Oc1ccccn1)COc1ccc(cc1)Oc1ccccc1	3.14	notB
0095759-44-7	CCCc1ccc(cc1)c1ccc(cc1F)c1ccc(cc1)CC	1.93	notB
0095977-29-0	OC(=O)C(Oc1ccc(cc1)Oc1ncc(cc1Cl)C(F)(F)F)C	0.94	notB
0096489-71-3	O=c1c(Cl)c(SCc2ccc(cc2)C(C)(C)C)cnn1C(C)(C)C	3.19333	notB
0097038-96-5	Brc1cccc(c1c1c(Br)cccc1Br)Br	4.97	B
0099387-89-0	CCCOCC(=Nc1ccc(cc1C(F)(F)F)Cl)n1cncc1	2.59	notB
0100468-92-6	ClCS(=O)(=O)Nc1ccc(c(c1Oc1cccc(c1Cl)Cl)Cl)Cl	1.86333	notB
0104294-16-8	Clc1ccc(c(c1)Cl)Oc1c(Cl)cc(cc1Cl)Cl	3.95	B
0107534-96-3	Clc1ccc(cc1)CCC(C(C)(C)C)(Cn1cncn1)O	1.795	notB
0110553-27-0	CCCCCCCCSCc1cc(CSCCCCCCCC)c(c(c1)C)O	1.7	notB
0111158-11-3	CCCC1CCC(CC1)c1ccc(cc1)I	2.83	notB
0113136-77-9	Clc1ccc(c(c1)Cl)NC(=O)C1(CC1)C(=O)O	-0.4	notB
0114012-04-3	N#Cc1cccc(c1OP(=S)(OC)OC)Cl	1.21341	notB
0114311-32-9	COCc1cnc(c(c1)C(=O)O)C1=NC(=O)C(N1)(C)C(C)C	-1	notB
0116020-44-1	CCCC1CCC(CC1)C1CCC(CC1)C=C	2.89	notB
0118134-30-8	CCCN(CC1COC2(O1)CCC(CC2)C(C)(C)C)CC	1.9	notB
0119168-77-3	CCc1nn(c(c1Cl)C(=O)NCc1ccc(cc1)C(C)(C)C)C	1.01	notB
0120928-09-8	CC(c1ccc(cc1)CCOc1ncnc2c1cccc2)(C)C	2.71	notB
0121552-61-2	Cc1nc(Nc2ccccc2)nc(c1)C1CC1	2.59	notB
0123251-96-7	Clc1cc(cc(c1N)S(=O)(=O)O)c1cc(Cl)c(c(c1)S(=O)(=O)O)N	0.0914286	notB
0124729-02-8	CCCCCC1CCC(CC1)c1ccc(c(c1F)F)OCC	2.07	notB
0126690-66-2	CC(CC(=CC(C)C)C)C	3.29	notB
0131983-72-7	OC1(Cn2ncnc2)C(=Cc2ccc(cc2)Cl)CCC1(C)C	0.78	notB
0132182-92-4	COC(C(C(F)(F)F)(C(F)(F)F)F)(C(C(F)(F)F)(F)F)F	3.41	B
0134605-64-4	C=CCOC(=O)C(OC(=O)c1cc(ccc1Cl)n1c(=O)cc(n(c1=O)C)C(F)(F)F)(C)C	0.6	notB
0134701-20-5	CCCCCCCCCCCCCCC(c1cc(C)cc(c1O)C)C	0.78	notB
0135861-56-2	OCC(C1OC(OC2C1OC(OC2)c1ccc(c(c1)C)C)c1ccc(c(c1)C)C)O	1.23	notB
0145701-23-1	COc1ncc(c2n1nc(n2)S(=O)(=O)Nc1c(F)cccc1F)F	0.18	notB
0154279-60-4	CCC(NC1CCC(CC1)CC1CCC(CC1)NC(CC)C)C	0.93	notB
0155041-85-3	C=CC1CCC(CC1)C1CCC(CC1)c1ccc(cc1)C	2.08	notB
0155569-91-8	CCC(C1OC2(C=CC1C)OC1CC=C(C)C(OC3CC(OC)C(C(O3)C)OC3CC(OC)C(C(O3)C)NC)C(C)C=CC=C3C4(C(C(=O)OC(C2)C1)C=C(C)C(C4OC3)O)O)C	1.79333	notB
0156573-09-0	CCOc1ccc(c(c1F)F)Br	2.69	notB
0160535-46-6	O=C(NC1CCCCC1C)CC(C(=O)NC1CCCCC1C)CC(=O)NC1CCCCC1C	1.41	notB
0174300-34-6	CC(OC(=O)C(C(=O)OC(C)C)(Cl)Cl)C	0.292706	notB
0174350-05-1	CCCC1CCC(CC1)c1ccc(c(c1F)F)OCC	1.87	notB
0180409-60-3	O=C(N=C(c1c(F)c(F)ccc1C(F)(F)F)NOCC1CC1)Cc1ccccc1	2.72	notB
0181587-01-9	N#Cc1nn(c(c1S(=O)CC)N)c1c(Cl)cc(cc1Cl)C(F)(F)F	0.98	notB
0183677-34-1	CC(CC(c1sccc1N)C)C	1.78	notB
0188023-86-1	CC(=CC1C(C1(C)C)C(=O)OCc1cccc(c1)Oc1ccccc1)C	2.61844	notB
0195209-93-9	ClC(C(=O)OC(C)C)C(=O)OC(C)C	0.0517769	notB
0208338-50-5	CCCC1CCC(CC1)C1CCC(CC1)C(Oc1cc(F)c(c(c1)F)F)(F)F	1.28	notB
0216698-07-6	CC(=O)Oc1ccc(cc1C1C(=O)Oc2c1cc(cc2)C(CC(C)(C)C)(C)C)C(CC(C)(C)C)(C)C	1.56	notB
0219750-66-0	CC(CC1CC(C)CCC1C)C	3.37	B
0250736-57-3	N#N=C(S(=O)(=O)C1CCCC2(C1)OCCO2)S(=O)(=O)C1CCCC2(C1)OCCO2	1.43	notB
0303186-20-1	CCCc1ccc(cc1)c1cc(F)c(c(c1)F)C(Oc1cc(F)c(c(c1)F)F)(F)F	1.81	notB
0371146-04-2	CCCCC(C(=O)OCCOc1ccc(c(c1)O)c1nc(nc(n1)c1ccccc1)c1ccccc1)CC	1.77	notB
0701909-41-3	O=C(C(=C)Cl)OCCC(C(C(C(F)(F)F)(F)F)(F)F)(F)F	1.87	notB
0727678-39-9	CCCCOCCCN1C(=Nc2c(S1(=O)=O)cccc2)C(N1C(=O)OC(C1=O)(C)C)C(=O)Nc1cc(ccc1SCC(CCCC)CC)C(C)(C)C	1.11	notB
1072957-71-1	Cn1nc(c(c1)C(=Nc1cccc2c1C1CCC2C1=C(Cl)Cl)O)C(F)F	2.475	notB
1204225-72-8	O=P(Oc1ccccc1c1ccccc1)(Oc1ccccc1)Oc1ccccc1	2.82	notB
1424148-99-1	CC=CC=CC=CC=CC1CC(=O)N(C1=O)CCCCCC(=O)O	1.71	notB
UNK-01	CCC(c1ccc(cc1)OCC(CO)O)C	0.756667	notB
UNK-02	CC(CC(c1ccc(cc1)OC(C(F)F)(F)F)(c1ccc(cc1)OC(C(F)F)(F)F)C)C	3.76	B
UNK-03	CCCCC(C(c1ccc(cc1)OC(C(F)F)(F)F)c1ccc(cc1)OC(C(F)F)(F)F)CC	3.19	notB
UNK-04	CCCCCCCc1ccc(cc1)OC(C(F)F)(F)F	2.96	notB
UNK-05	CCCCCCC(c1ccc(cc1)OC(C(F)F)(F)F)(c1ccc(cc1)OC(C(F)F)(F)F)C	2.85	notB
UNK-06	FC(C(Oc1ccc(cc1)C(CC(C)(C)C)(C)C)(F)F)F	3.92	B
UNK-07	OCCN(c1cccc(c1)N)CCO	0.085	notB
UNK-08	CC(CC(C)(C)C)CCC(C(CC(C)(C)C)C)COS(=O)(=O)O	2.155	notB
UNK-11	CN(S(=O)(=O)Nc1ccccc1)C	0.51	notB
UNK-12	OCCN(c1nc(nc(n1)Nc1ccc(cc1)S(=O)(=O)O)Nc1ccc(c(c1)S(=O)(=O)O)C=Cc1ccc(cc1S(=O)(=O)O)Nc1nc(Nc2cccc(c2)S(=O)(=O)O)nc(n1)N(CCO)CCO)CCO	0.095	notB
UNK-13	CCCCCCCCCCCCSP(=O)(SCCCCCCCCCCCC)SCCCCCCCCCCCC	0.09	notB
UNK-14	C#CCOCOc1ccc(cc1)Cl	2.23	notB
UNK-15	OC(=O)C1C(C(=O)O)C2(C)CCC1(C=C2)C(C)C	0.095	notB
UNK-18	CC(C(C(c1ccc(cc1)OC(C(F)F)(F)F)(C)C)C)C	3.71	B
UNK-19	CC(c1ccc(cc1)OP(=O)(Oc1ccccc1)Oc1ccccc1)(C)C	3.2	notB
UNK-21	CCC(OC(=O)CC(C(S(=O)(=O)O)C(=O)OC(COCC(C(F)(F)F)(F)F)CC)C(=O)OC(COCC(C(F)(F)F)(F)F)CC)COCC(C(F)(F)F)(F)F	1.29	notB

## Sheet: Table S4
Table S4. List of outliers excluded from the modelling.
CAS	SMILES	Exp. log BCF	a priori class
0000006-60-7	OC(=O)c1nc(Cl)c(c(c1Cl)N)Cl	-1.7	notB
0000017-98-9	OS(=O)(=O)c1cc2c(c(c1N=Nc1cc(C)c(cc1OCCCS(=O)(=O)O)N=Nc1cc(cc3c1c(O)cc(c3)S(=O)(=O)O)S(=O)(=O)O)O)ccc(c2S(=O)(=O)O)N=Nc1c(ccc2c1cc(c(c2O)N=Nc1ccc2c(c1)cc(c(c2O)N=Nc1ccccc1S(=O)(=O)O)S(=O)(=O)O)S(=O)(=O)O)Nc1ccccc1	1.59	notB
0000112-27-6	OCCOCCOCCO	3.23	notB
0000311-89-7	FC(C(C(C(F)(F)F)(F)F)(F)F)(N(C(C(C(C(F)(F)F)(F)F)(F)F)(F)F)C(C(C(C(F)(F)F)(F)F)(F)F)(F)F)F	0.518	notB
0001709-70-2	CC(c1cc(Cc2c(C)c(Cc3cc(c(c(c3)C(C)(C)C)O)C(C)(C)C)c(c(c2C)Cc2cc(c(c(c2)C(C)(C)C)O)C(C)(C)C)C)cc(c1O)C(C)(C)C)(C)C	0.455	notB
0001852-26-7	N#Cc1cnn(c1N=Nc1c(N)n(nc1C(C)(C)C)c1nc(O)nc(n1)n1nc(c(c1N)N=Nc1c(C#N)cnn1c1cc(cc(c1)C(=O)O)C(=O)O)C(C)(C)C)c1cc(cc(c1)C(=O)O)C(=O)O	0.4	notB
0004404-43-7	OCCN(c1nc(Nc2ccc(c(c2)S(=O)(=O)O)C=Cc2ccc(cc2S(=O)(=O)O)Nc2nc(Nc3ccccc3)nc(n2)N(CCO)CCO)nc(n1)Nc1ccccc1)CCO	0.945	notB
0005586-15-2	c1ccc2c(c1)cc(cc2)SSc1ccc2c(c1)cccc2	0.0166667	notB
0006683-19-8	O=C(CCc1cc(c(c(c1)C(C)(C)C)O)C(C)(C)C)OCC(COC(=O)CCc1cc(c(c(c1)C(C)(C)C)O)C(C)(C)C)(COC(=O)CCc1cc(c(c(c1)C(C)(C)C)O)C(C)(C)C)COC(=O)CCc1cc(c(c(c1)C(C)(C)C)O)C(C)(C)C	-0.17	notB
0013654-09-6	Brc1c(c2c(Br)c(Br)c(c(c2Br)Br)Br)c(Br)c(c(c1Br)Br)Br	0.635	notB
0016090-02-1	OS(=O)(=O)c1cc(ccc1C=Cc1ccc(cc1S(=O)(=O)O)Nc1nc(Nc2ccccc2)nc(n1)N1CCOCC1)Nc1nc(Nc2ccccc2)nc(n1)N1CCOCC1	1.01536	notB
0016372-96-6	Brc1cc(Br)cc(c1)c1ccccc1	0.02	notB
0027323-18-8	Clc1ccccc1c1ccccc1	5.2875	B
0033284-54-7	Clc1cc(Cl)c(c(c1Cl)c1ccccc1)Cl	1.36571	notB
0071751-41-2	COC1CC(OC2C(C)C=CC=C3COC4C3(O)C(C=C(C4O)C)C(=O)OC3CC(CC=C2C)OC2(C3)C=CC(C(O2)C(CC)C)C)OC(C1OC1CC(OC)C(C(O1)C)O)C	3.115	notB
0076330-06-8	COc1c(O)c(OC)c(c(c1Cl)C=O)Cl	4.36333	B

## Sheet: Table S5
Table S5. List of chemicals with identifiers (ID and CAS), Splitting Scheme, values of the modelled endpoint (Exp_log BCF), molecular descriptors selected in the best MLR-OLS model (maxHBd, maxdO, IC0, MWC4, SubFPC171, SubFPC295), and predictions generated by different MLR and ANN.
ID	CAS	Split	Exp_log_BCF	maxHBd	maxdO	IC0	MWC4	SubFPC171	SubFPC295	Pred_log_BCF_MLR	Pred_log_BCF_ANN
1	0000002-35-5	Prediction	2.33	0	0	2.17131	6.01859	1	4	2.13662	2.10883
3	0000012-51-0	Training	2.12	0.521092	0	1.18672	6.6107	0	2	2.45924	1.89181
4	0000013-24-1	Training	1.3	0.421579	12.0158	1.32333	6.58064	0	4	1.62311	1.17677
5	0000017-62-4	Training	0.48	0.55847	13.2574	2.05256	7.97968	0	21	0.458946	0.899906
7	0000018-35-4	Training	2.98	0	0	0.979869	5.75257	0	0	2.69199	2.89995
8	0000020-18-0	Prediction	1.41	0	0	1.52488	7.07412	0	2	3.27822	3.17695
9	0000047-09-5	Training	0.54	0.676389	10.7942	1.61884	5.69373	0	4	0.522697	0.721951
10	0000050-04-4	Prediction	1.3	0.081995	13.4745	1.36131	7.0184	0	7	1.98157	2.28215
11	0000050-06-6	Training	0.7	0.59462	11.9758	1.65819	6.28227	0	7	0.710743	0.828268
12	0000050-28-2	Prediction	0.706667	0.49977	0	1.20721	6.632	0	2	2.49124	2.00323
13	0000050-29-3	Prediction	3.64813	0	0	1.47014	6.31173	2	0	3.36502	3.55857
14	0000050-30-6	Prediction	0.491482	0.700386	10.6949	1.79679	5.63835	2	2	1.03631	1.51817
15	0000050-31-7	Prediction	0.588333	0.671922	10.8653	1.82947	5.77765	3	2	1.3931	1.84268
16	0000050-32-8	Prediction	2.5418	0	0	0.954434	6.64769	0	0	3.42534	3.53264
17	0000050-65-7	Training	2.4	0.535724	12.1895	1.95778	6.36819	2	5	1.35705	1.09355
18	0000051-28-5	Training	0.652339	0.707149	10.2195	1.90397	5.80212	0	3	0.558263	0.649857
19	0000051-44-5	Prediction	0.581429	0.732985	10.496	1.79679	5.59471	2	2	0.973417	1.48686
20	0000051-52-5	Training	1.09	0	10.863	1.84522	5.52545	0	6	0.87293	0.911034
21	0000051-79-6	Training	0.36	0.725139	9.59931	1.66918	4.29046	0	4	-0.624421	0.168149
22	0000052-68-6	Training	-1.27643	0.428749	11.8049	2.08418	5.7462	0	3	0.664466	0.389358
23	0000053-70-3	Prediction	2.8	0	0	0.964079	6.67077	0	0	3.43897	3.53853
24	0000055-38-9	Training	2.2348	0	0	1.77428	6.01372	0	5	1.99975	2.12503
25	0000055-63-0	Training	0.97	0	9.83158	1.83949	5.61677	0	3	1.30365	1.08706
26	0000056-23-5	Training	1.16041	0	0	0.721928	4.39445	0	0	1.73108	1.85041
27	0000056-38-2	Prediction	2.2344	0	10.5412	1.93338	6.08904	0	4	1.4974	1.79176
28	0000056-49-5	Training	3.17	0	0	0.986787	6.70073	0	0	3.45146	3.5456
29	0000056-55-3	Training	2.8725	0	0	0.970951	6.4151	0	0	3.22971	3.38192
30	0000057-10-3	Training	2.85	0.702471	10.3007	1.12386	5.57973	0	2	0.878814	1.41043
31	0000057-15-8	Training	0.276902	0.424537	0	1.74647	5.273	0	1	1.31016	0.774843
32	0000057-41-0	Prediction	0.54	0.576879	12.3131	1.54701	6.43455	0	6	0.991849	1.08941
33	0000057-63-6	Prediction	2.29364	0.492166	0	1.20883	6.75344	0	2	2.59717	2.08882
34	0000057-97-6	Prediction	2.91	0	0	0.991076	6.57508	0	0	3.34815	3.46645
35	0000058-73-1	Training	1.25667	0	0	1.27879	6.12905	0	5	2.34616	2.20408
36	0000058-90-2	Training	2.062	0.524546	0	1.73815	5.70711	4	1	2.49288	2.62755
37	0000059-50-7	Prediction	0.985949	0.65362	0	1.54356	5.35186	1	1	1.44227	1.71699
38	0000060-00-4	Prediction	0.345	0.719435	10.555	1.74717	5.99894	0	14	-0.326957	0.457112
39	0000060-09-3	Prediction	1.565	0.535596	0	1.39936	5.87212	0	3	1.63967	1.35815
40	0000060-29-7	Training	0.519091	0	0	1.15894	3.7612	0	2	0.799497	0.289344
41	0000060-51-5	Prediction	0.768378	0.456912	10.9784	2.02729	5.47646	0	6	0.191097	0.572004
42	0000060-57-1	Prediction	3.48753	0	0	1.69825	6.98564	0	2	3.11829	3.09397
43	0000061-82-5	Training	0.0683333	0.665278	0	1.52193	4.76217	0	5	0.331324	0.0721511
44	0000062-44-2	Prediction	1.08	0.501845	10.6814	1.49563	5.63835	0	5	0.65562	0.902959
45	0000062-53-3	Prediction	0.431723	0.540694	0	1.29584	4.89035	0	1	1.09485	1.18433
46	0000062-56-6	Prediction	-0.1	0.577829	0	1.75	3.61092	0	3	-0.409634	-0.255249
47	0000062-73-7	Training	-0.246206	0	11.3037	2.07818	5.38907	0	3	0.917157	0.847326
48	0000063-25-2	Prediction	1.18675	0.575718	11.0916	1.50531	5.99396	0	5	0.82647	1.02724
49	0000065-85-0	Training	0.92	0.782361	10.2009	1.42947	5.25227	0	2	0.369459	1.06979
50	0000066-81-9	Prediction	0.734286	0.535611	12.1764	1.45777	6.34036	0	6	1.01828	1.08179
51	0000067-66-3	Prediction	0.827444	0	0	1.37095	3.61092	0	0	0.768375	0.84567
52	0000067-68-5	Training	0.183333	0	9.75309	1.57095	3.61092	0	2	-0.0695982	-0.413038
53	0000067-72-1	Training	2.41019	0	0	0.811278	5.273	0	0	2.39235	2.65204
54	0000068-12-2	Training	-0.1081	0	9.43056	1.5511	4.00733	0	4	0.0790148	-0.145948
55	0000068-22-4	Training	1.42	0.455766	11.704	1.19642	6.75344	0	2	2.002	1.74393
56	0000070-30-4	Prediction	2.16595	0.359157	0	1.75025	6.47543	6	2	3.67629	3.09427
57	0000071-36-3	Training	-0.4	0.736389	0	1.15894	3.7612	0	1	0.0237466	0.605795
58	0000071-43-2	Training	1.50832	0	0	1	4.57471	0	0	1.73382	1.80594
59	0000071-55-6	Training	0.593232	0	0	1.56128	4.39445	0	0	1.3015	1.19713
60	0000072-43-5	Prediction	2.92294	0	0	1.57664	6.38856	0	4	2.50172	2.6099
61	0000072-54-8	Training	4.48	0	0	1.43156	6.19644	2	0	3.29198	3.54968
62	0000072-55-9	Training	3.14417	0	0	1.41956	6.19644	2	0	3.29813	3.57303
63	0000074-11-3	Training	1.06	0.761449	10.3256	1.68948	5.42495	1	2	0.630309	1.18405
64	0000074-31-7	Training	3.12942	0.359802	0	1.25163	6.24028	0	4	2.12124	2.41249
65	0000074-97-5	Training	0.458464	0	0	1.92193	2.56495	0	0	-0.355342	-0.120421
66	0000075-09-2	Prediction	1.15149	0	0	1.52193	2.56495	0	0	-0.15062	0.130154
67	0000075-25-2	Prediction	1.08289	0	0	1.37095	3.61092	0	0	0.768375	0.84567
68	0000075-35-4	Prediction	0.956485	0	0	1.58496	3.61092	0	0	0.658843	0.76062
69	0000075-64-9	Training	0.655	0.408333	0	1.12164	4.39445	0	1	0.942198	0.520854
70	0000075-65-0	Prediction	0.311667	0.616667	0	1.15894	4.39445	0	1	0.675586	1.17937
71	0000075-69-4	Training	1.32	0	0	1.37095	4.39445	0	0	1.39891	1.33439
72	0000075-71-8	Training	0.862809	0	0	1.52193	4.39445	0	0	1.32164	1.2245
73	0000075-91-2	Prediction	0.58	0.901389	0	1.29879	4.63473	0	1	0.459086	1.64065
74	0000075-98-9	Prediction	0.173665	0.741667	10.0208	1.33282	4.93447	0	2	0.221453	1.11506
75	0000076-01-7	Prediction	1.8125	0	0	1.29879	4.93447	0	0	1.87041	2.01215
76	0000076-12-0	Training	1.71764	0	0	1.5	5.273	0	0	2.03986	2.04123
77	0000076-13-1	Training	1.63481	0	0	1.56128	5.273	0	0	2.0085	1.99029
78	0000076-14-2	Training	1.49	0	0	1.5	5.273	0	0	2.03986	2.04123
79	0000076-44-8	Training	3.50358	0	0	1.5285	6.72022	0	0	3.1899	3.22788
80	0000076-83-5	Training	2.61405	0	0	1.14888	6.40192	0	0	3.12804	3.24299
81	0000076-93-7	Training	-0.124	0.601471	11.3721	1.37255	6.20456	0	3	1.21616	1.02305
82	0000077-47-4	Training	2.1807	0	0	0.99403	5.88332	0	0	2.78996	2.98936
83	0000077-73-6	Training	2.23872	0	0	0.99403	5.93754	0	0	2.83359	3.03043
84	0000077-99-6	Prediction	0.81	0.611389	0	1.32497	5.1985	0	3	1.0456	0.992584
85	0000078-32-0	Prediction	3.16733	0	13.433	1.45933	6.58341	0	3	2.07771	2.32314
86	0000078-40-0	Training	-0.0280979	0	11.47	1.54224	5.36129	0	3	1.15993	1.11403
87	0000078-42-2	Training	1.08038	0	13.5525	1.23027	6.3613	0	3	2.00962	1.997
88	0000078-48-8	Training	3.13727	0	13.2451	1.45588	5.73334	0	3	1.40575	1.32689
89	0000078-51-3	Prediction	0.639813	0	12.7699	1.39405	6.11589	0	9	1.17645	1.11662
90	0000078-59-1	Training	0.562378	0	11.0127	1.17528	5.60212	0	1	1.76506	1.10964
91	0000078-63-7	Training	3.61	0	0	1.21834	6.21261	0	4	2.5435	2.38836
92	0000078-79-5	Training	1.14063	0	0	0.961237	4.00733	0	0	1.29708	1.24983
93	0000078-87-5	Training	0.614254	0	0	1.43537	4.00733	0	0	1.05441	0.943782
94	0000079-00-5	Training	0.575591	0	0	1.56128	4.00733	0	0	0.989973	0.870403
95	0000079-01-6	Training	1.07251	0	0	1.45915	4.00733	0	0	1.04224	0.929523
96	0000079-06-1	Training	0.09	0.677431	9.47222	1.68548	4.00733	0	2	-0.598595	0.0526383
97	0000079-19-6	Training	1.105	0.638657	0	1.68548	4.00733	0	3	-0.129873	-0.330023
98	0000079-27-6	Training	0.749932	0	0	1.5	4.46591	0	0	1.39037	1.30364
99	0000079-34-5	Training	0.993468	0	0	1.5	4.46591	0	0	1.39037	1.30364
100	0000079-46-9	Prediction	0.601221	0	9.50463	1.66918	4.46591	0	1	0.681015	0.106261
101	0000079-57-2	Prediction	-0.43	0.610931	13.3426	1.64559	7.19669	0	13	0.763407	1.07006
102	0000079-92-5	Prediction	2.96206	0	0	0.961237	5.9108	0	0	2.82886	3.06883
103	0000079-94-7	Prediction	2.46984	0.437014	0	1.66188	6.49979	0	2	2.2267	2.06814
104	0000080-05-7	Training	1.13953	0.588727	0	1.26853	6.20051	0	2	2.00692	1.60235
105	0000080-07-9	Training	1.96	0	12.4313	1.80307	6.20051	2	2	2.22196	2.38043
106	0000080-09-1	Training	-0.18	0.629459	12.2413	1.63493	6.20051	0	4	0.898321	0.846245
107	0000080-43-3	Training	2.79539	0	0	1.22169	6.32615	0	2	2.83148	2.65177
108	0000080-51-3	Training	-0.02	0.638787	11.6328	2.0221	6.48768	0	4	0.953704	0.78956
109	0000081-14-1	Prediction	3.09	0	11.7525	1.64511	6.51175	0	3	2.01753	2.35288
110	0000081-15-2	Training	3.67299	0	11.3106	1.78416	6.51175	0	3	1.97071	2.18931
111	0000081-16-3	Prediction	0.38	0.548074	11.2914	1.81398	6.16331	0	2	1.1241	1.10617
112	0000082-05-3	Training	1.88629	0	12.4944	1.13928	6.49072	0	1	2.41695	1.90622
113	0000082-44-0	Training	2.22325	0	12.3483	1.46186	6.36819	1	2	2.29912	2.48785
114	0000082-45-1	Training	2.06128	0.527904	12.2421	1.47612	6.36819	0	3	1.33431	0.993913
115	0000082-68-8	Training	2.08659	0	10.9659	1.7274	6.02828	5	1	3.01294	2.65787
116	0000083-32-9	Training	2.80501	0	0	0.99403	6.01859	0	0	2.89882	3.0906
117	0000083-42-1	Training	1.99	0	10.3977	1.90151	5.62402	1	1	1.68187	1.95053
118	0000083-79-4	Training	1.34667	0	13.5171	1.4046	6.9594	0	11	1.61036	1.19185
119	0000084-15-1	Prediction	3.20251	0	0	0.988699	6.22456	0	0	3.06729	3.25694
120	0000084-47-9	Training	2.48	0	12.5805	1.25163	6.53524	0	2	2.29137	2.40906
121	0000084-51-5	Training	1.90146	0	12.3694	1.27291	6.39192	0	2	2.17677	2.28489
122	0000084-57-1	Prediction	1.05	0.534334	11.7594	2.20541	6.40853	2	5	1.28812	1.24319
123	0000084-65-1	Prediction	2	0	12.1013	1.28067	6.286	0	2	2.10233	2.27552
124	0000084-66-2	Prediction	2.07	0	11.5442	1.42947	5.93225	0	6	1.37554	1.54823
125	0000084-74-2	Training	2.47869	0	11.9447	1.34214	6.08904	0	6	1.52435	1.50643
126	0000084-75-3	Training	3.24	0	12.1878	1.27997	6.22456	0	6	1.65183	1.60487
127	0000085-01-8	Training	3.32889	0	0	0.979869	6.08904	0	0	2.96276	3.15341
128	0000085-22-3	Training	2.17512	0	0	1.54663	5.92693	0	0	2.54223	2.58662
129	0000085-41-6	Prediction	1.135	0.634861	10.944	1.6494	5.82008	0	4	0.649824	0.942215
130	0000085-68-7	Prediction	1.62739	0	12.2432	1.35303	6.31897	0	6	1.68736	1.81388
131	0000085-83-6	Prediction	0.75	0.476883	12.2797	1.4417	6.7417	0	5	1.51273	1.25273
132	0000086-30-6	Training	1.67829	0	10.7819	1.5143	5.93754	0	2	1.77503	1.63364
133	0000086-50-0	Training	1.788	0	12.2753	2.1236	6.286	0	7	1.16552	1.30833
134	0000086-73-7	Training	2.80133	0	0	0.987693	6.05678	0	0	2.9328	3.1237
135	0000086-74-8	Training	2.28701	0.381389	0	1.20721	6.05678	0	2	2.16899	1.94771
136	0000086-87-3	Training	0.167617	0.702155	10.6124	1.32501	5.9428	0	2	1.05124	1.38474
137	0000087-02-5	Training	0.145714	0.584069	11.0751	1.85391	6.21261	0	3	1.01332	0.816173
138	0000087-40-1	Training	2.85404	0	0	1.749	5.63835	3	2	2.71907	2.71444
139	0000087-62-7	Training	0.45	0.478194	0	1.21924	5.37064	0	1	1.59481	1.27968
140	0000087-65-0	Training	1.2981	0.593997	0	1.73815	5.37064	2	1	1.66562	1.68811
141	0000087-68-3	Training	2.61911	0	0	0.970951	5.31321	0	0	2.34298	2.53852
142	0000087-82-1	Training	3.07978	0	0	1	5.85507	0	0	2.76417	2.96259
143	0000087-83-2	Prediction	2.61975	0	0	1.50582	5.85507	0	0	2.50529	2.62177
144	0000087-84-3	Training	2.52542	0	0	1.80164	5.85507	0	0	2.35389	2.32437
145	0000088-06-2	Prediction	2.47889	0.565533	0	1.77586	5.54126	3	1	2.05443	2.50629
146	0000088-18-6	Training	1.94	0.539583	0	1.18297	5.68017	0	1	1.78954	1.69998
147	0000088-19-7	Prediction	0.160129	0.543102	10.9796	1.81289	5.68017	0	1	0.858101	0.242944
148	0000088-26-6	Training	1.515	0.514079	0	1.19554	6.24804	0	2	2.17122	1.65524
149	0000088-30-2	Training	1.1	0.720065	10.2036	2.10541	5.97381	0	2	0.67802	0.735423
150	0000088-44-8	Training	0.2	0.607269	10.8296	1.87157	5.80212	0	2	0.759066	0.738655
151	0000088-60-8	Training	1.965	0.499583	0	1.16258	5.80212	0	1	1.94563	1.6925
152	0000088-72-2	Training	1.32501	0	10.2273	1.65788	5.45959	0	1	1.44663	0.83788
153	0000088-73-3	Training	1.96281	0	10.2535	1.98523	5.45959	1	1	1.51464	1.71247
154	0000088-74-4	Training	0.822256	0.600694	10.1473	1.81128	5.45959	0	2	0.559675	0.638701
155	0000088-75-5	Prediction	1.10726	0.710833	10.0673	1.78194	5.45959	0	2	0.448241	0.953267
156	0000088-85-7	Training	0.983485	0.536871	10.6827	1.75976	6.12905	0	3	1.07196	0.875404
157	0000088-89-1	Training	0.125556	0.695899	10.3718	1.89682	6.07993	0	4	0.691307	0.737216
158	0000088-98-2	Training	0.32	0.690278	10.572	1.49492	5.69373	0	4	0.58186	0.771833
159	0000089-59-8	Training	1.92	0	10.3977	1.90151	5.60947	1	1	1.67016	1.93673
160	0000089-61-2	Training	1.66778	0	10.4239	2.07416	5.60947	2	1	1.81734	1.99842
161	0000089-63-4	Training	1.05235	0.58612	10.3177	2.05504	5.60947	1	2	0.800452	0.817679
162	0000089-69-0	Training	1.73805	0	10.5485	2.07416	5.75257	3	1	2.16261	2.19892
163	0000089-72-5	Prediction	1.49	0.551806	0	1.18297	5.54908	0	1	1.66952	1.7838
164	0000089-83-8	Training	1.48	0.539583	0	1.18297	5.60947	0	1	1.73264	1.65496
165	0000089-93-0	Training	0.956657	0.469028	0	1.21924	5.2832	0	1	1.53534	1.19953
166	0000090-12-0	Training	2.544	0	0	0.998364	5.72685	0	0	2.66182	2.86332
167	0000090-13-1	Training	2.63	0	0	1.23266	5.72685	1	0	2.7789	2.86644
168	0000090-30-2	Training	3.29177	0.338819	0	1.17003	6.17587	0	2	2.33442	2.38188
169	0000090-41-5	Training	1.55145	0.486079	0	1.20691	5.826	0	1	1.9582	1.61387
170	0000090-51-7	Training	0.207762	0.585709	11.0636	1.85391	6.21261	0	3	1.012	0.816717
171	0000090-94-8	Training	1.55698	0	12.3814	1.37379	6.29342	0	7	1.5494	1.46319
172	0000091-15-6	Training	0.385367	0	0	1.37878	5.39816	0	2	2.0043	1.82149
173	0000091-20-3	Prediction	2.05883	0	0	0.991076	5.57215	0	0	2.54107	2.79519
174	0000091-22-5	Prediction	0.69994	0	0	1.2533	5.57215	0	2	2.20854	2.11406
175	0000091-23-6	Training	0.76626	0	10.3062	1.72227	5.55683	0	3	1.28926	1.18777
176	0000091-53-2	Prediction	1.84	0.237053	0	1.30032	6.18415	0	4	2.19699	2.29214
177	0000091-57-6	Training	3.19057	0	0	0.998364	5.70711	0	0	2.64594	2.8475
178	0000091-58-7	Training	3.63	0	0	1.23266	5.70711	1	0	2.76301	2.84962
179	0000091-63-4	Training	0.48	0	0	1.2345	5.70711	0	2	2.32676	2.13417
180	0000091-64-5	Prediction	1.31	0	10.7168	1.37928	5.70711	0	3	1.56312	1.64904
181	0000091-66-7	Training	2.0152	0	0	1.1688	5.46806	0	3	2.06885	1.82211
182	0000091-94-1	Prediction	2.35582	0.473376	0	1.61433	6.11147	2	2	2.36931	2.25025
183	0000091-96-3	Prediction	-0.175	0.434343	11.7796	1.50531	6.6053	0	8	1.15101	1.14271
184	0000092-06-8	Prediction	1.32899	0	0	0.988699	6.20456	0	0	3.0512	3.24416
185	0000092-24-0	Prediction	2.41	0	0	0.970951	6.40192	0	0	3.2191	3.37963
186	0000092-52-4	Prediction	2.61	0	0	0.99403	5.68698	0	0	2.63196	2.88019
187	0000092-69-3	Training	1.65911	0.637941	0	1.20883	5.80212	0	1	1.75757	2.03462
188	0000092-70-6	Training	0.366667	0.719197	10.7054	1.42268	6.00389	0	3	0.925877	0.937799
189	0000092-77-3	Training	0.720073	0.494093	12.2075	1.42038	6.35784	0	4	1.29743	0.969479
190	0000092-83-1	Prediction	3.62	0	0	1.19642	6.07074	0	2	2.63887	2.52414
191	0000092-84-2	Training	2.65049	0.34088	0	1.41274	6.07074	0	4	1.92483	2.3251
192	0000092-86-4	Training	3.55512	0	0	1.32218	5.90536	0	0	2.63975	2.74234
193	0000092-87-5	Training	1.84167	0.512647	0	1.31432	5.90536	0	2	1.83637	1.32412
194	0000092-88-6	Prediction	1.525	0.637941	0	1.32501	5.90536	0	2	1.68203	1.52937
195	0000093-46-9	Training	3.28	0.322442	0	1.19642	6.74406	0	4	2.5993	2.89078
196	0000093-76-5	Training	0.998182	0.765596	10.3424	1.87322	5.83188	3	4	1.13354	0.583213
197	0000094-52-0	Prediction	0.298614	0.547639	10.3377	1.85123	5.83773	0	5	0.598594	0.852478
198	0000094-74-6	Prediction	0.406667	0.78211	10.2339	1.64973	5.70044	1	4	0.654532	0.876739
199	0000094-75-7	Training	1.18	0.781606	10.2473	1.81295	5.70044	2	4	0.807845	0.555041
200	0000095-14-7	Training	0.83	0.718194	0	1.53062	5.50939	0	2	1.1628	0.859414
201	0000095-16-9	Training	0.746148	0	0	1.57442	5.50939	0	4	1.79535	1.75064
202	0000095-47-6	Prediction	1.18	0	0	0.991076	5.15329	0	0	2.20399	2.45375
203	0000095-48-7	Training	1.03	0.659583	0	1.27178	5.15329	0	1	1.17751	1.50441
204	0000095-49-8	Training	1.89148	0	0	1.28669	5.15329	1	0	2.28968	2.27794
205	0000095-50-1	Training	2.48292	0	0	1.45915	5.15329	2	0	2.43841	2.52036
206	0000095-51-2	Training	0.840592	0.507901	0	1.59167	5.15329	1	1	1.43099	0.98634
207	0000095-53-4	Training	0.44	0.509444	0	1.2533	5.15329	0	1	1.36535	1.16793
208	0000095-56-7	Training	1.60582	0.65669	0	1.61433	5.15329	0	1	1.00563	0.958138
209	0000095-57-8	Prediction	1.55629	0.65804	0	1.61433	5.15329	1	1	1.24101	1.41089
210	0000095-63-6	Training	2.21531	0	0	0.985228	5.35186	0	0	2.36678	2.55979
211	0000095-64-7	Prediction	0.880708	0.506806	0	1.21924	5.35186	0	1	1.54571	1.4924
212	0000095-68-1	Training	0.815	0.495556	0	1.21924	5.35186	0	1	1.55907	1.30959
213	0000095-69-2	Training	1.43503	0.49487	0	1.51973	5.35186	1	1	1.64309	1.24772
214	0000095-73-8	Training	2.95	0	0	1.42947	5.35186	2	0	2.61339	2.79004
215	0000095-76-1	Training	1.26683	0.505132	0	1.7274	5.35186	2	1	1.76159	1.47898
216	0000095-77-2	Training	1.71209	0.652632	0	1.73815	5.35186	2	1	1.58084	1.86657
217	0000095-78-3	Training	0.805702	0.489444	0	1.21924	5.35186	0	1	1.56634	1.2941
218	0000095-82-9	Training	1.31974	0.486914	0	1.7274	5.35186	2	1	1.78324	1.45388
219	0000095-94-3	Training	3.81198	0	0	1.45915	5.53339	4	0	3.21826	3.81077
220	0000095-95-4	Training	2.27692	0.588589	0	1.77586	5.53339	3	1	2.0207	2.51117
221	0000096-12-8	Training	1.28306	0	0	1.78993	4.31749	0	0	1.12254	0.990106
222	0000096-18-4	Training	1.02525	0	0	1.53948	4.31749	0	0	1.25072	1.14515
223	0000096-29-7	Training	0.369687	0.889167	0	1.4716	4.31749	0	1	0.12987	0.688712
224	0000096-45-7	Training	-0.0301058	0.397274	0	1.72957	4.76217	0	5	0.543469	0.501408
225	0000096-50-4	Training	0.065	0.562011	0	1.84644	4.76217	0	5	0.287931	0.00521983
226	0000096-69-5	Prediction	0.816667	0.355789	0	1.28474	6.67077	0	4	2.45549	2.8555
227	0000096-76-4	Training	2.49107	0.450581	0	1.11728	6.09807	0	1	2.2652	1.87085
228	0000096-91-3	Training	0.355	0.675899	10.3162	1.9593	5.92693	0	4	0.563023	0.649683
229	0000096-96-8	Training	0.752658	0.604379	10.3599	1.80161	5.68698	0	4	0.533198	0.630371
230	0000097-00-7	Prediction	1.13	0	10.4057	2.10846	5.80212	1	2	1.61967	1.92487
231	0000097-02-9	Training	1.11	0.631307	10.2995	1.95469	5.80212	0	3	0.618007	0.609115
232	0000097-23-4	Training	2.1106	0.501111	0	1.5947	6.14204	2	2	2.37101	2.10322
233	0000097-77-8	Training	2.35	0	0	1.56832	5.76519	0	10	1.40936	1.07362
234	0000098-08-8	Training	1.64931	0	0	1.50582	5.50939	0	0	2.22711	2.25119
235	0000098-10-2	Training	0.409997	0.563102	10.7588	1.90151	5.50939	0	1	0.663714	-0.166173
236	0000098-15-7	Prediction	2.08805	0	0	1.74647	5.65249	1	0	2.45609	2.33221
237	0000098-47-5	Training	0.7	0.651361	10.6888	2.01831	5.83773	0	2	0.667992	0.673143
238	0000098-54-4	Training	1.80248	0.633081	0	1.18297	5.64545	0	1	1.6505	1.96905
239	0000098-56-6	Training	2.21	0	0	1.74647	5.64545	1	0	2.45042	2.23807
240	0000098-73-7	Training	0.43131	0.715078	10.5619	1.29723	5.83188	0	2	0.963625	1.37803
241	0000098-81-7	Training	2.19	0	0	1.27178	5.25227	0	0	2.13998	2.21728
242	0000098-82-8	Training	1.55	0	0	0.985228	5.25227	0	0	2.28664	2.47098
243	0000098-83-9	Prediction	1.85604	0	0	0.998001	5.25227	0	0	2.2801	2.5317
244	0000098-84-0	Training	0.685	0.433472	0	1.21924	5.25227	0	1	1.5527	1.1176
245	0000098-95-3	Prediction	0.658806	0	10.0065	1.7274	5.25227	0	1	1.25639	0.791315
246	0000099-08-1	Training	0.981287	0	10.1587	1.65788	5.43372	0	1	1.4296	0.811906
247	0000099-09-2	Training	0.688166	0.582361	10.1031	1.81128	5.43372	0	2	0.563077	0.615105
248	0000099-54-7	Training	1.98282	0	10.3015	2.07416	5.59471	2	1	1.8122	1.97392
249	0000099-62-7	Training	2.94705	0	0	0.970951	5.65948	0	0	2.62164	2.8332
250	0000099-64-9	Training	1.105	0.727656	10.5572	1.54169	5.65948	0	5	0.387603	0.716499
251	0000099-65-0	Training	0.771545	0	10.1587	1.90564	5.65948	0	2	1.38531	1.0878
252	0000099-71-8	Prediction	1.41362	0.637864	0	1.18297	5.51745	0	1	1.54182	2.00793
253	0000099-88-7	Prediction	1.035	0.506397	0	1.1916	5.42495	0	1	1.61916	1.57192
254	0000099-99-0	Training	0.970512	0	10.1178	1.65788	5.42495	0	1	1.42479	0.803885
255	0000100-00-5	Training	1.7452	0	10.1311	1.98523	5.42495	1	1	1.49351	1.66479
256	0000100-01-6	Training	0.685875	0.571307	10.077	1.81128	5.42495	0	2	0.570594	0.605115
257	0000100-02-7	Training	1.00581	0.718399	10.0361	1.78194	5.42495	0	2	0.413098	0.749063
258	0000100-17-4	Training	1.0479	0	10.1653	1.72227	5.51745	0	3	1.26534	1.12624
259	0000100-25-4	Prediction	-0.398455	0	10.1178	1.90564	5.65249	0	2	1.38194	1.24495
260	0000100-26-5	Prediction	0.710175	0.802211	10.2947	1.77798	5.65249	0	6	0.0877615	0.779083
261	0000100-37-8	Prediction	0.29	0.672083	0	1.30125	4.74493	0	4	0.521468	0.549134
262	0000100-40-3	Prediction	2.24959	0	0	0.970951	5.04343	0	0	2.12588	2.37552
263	0000100-41-4	Training	1.19	0	0	0.991076	5.04343	0	0	2.11558	2.27293
264	0000100-42-5	Training	1.13	0	0	1	5.04343	0	0	2.11101	2.26491
265	0000100-43-6	Training	1.92131	0	0	1.28669	5.04343	0	2	1.76596	1.50355
266	0000100-61-8	Training	0.70732	0.415694	0	1.2533	5.04343	0	2	1.28916	0.769453
267	0000100-66-3	Training	1.34	0	0	1.27178	5.04343	0	2	1.77359	1.50593
268	0000100-80-1	Prediction	1.55	0	0	0.998001	5.26269	0	0	2.28849	2.54041
269	0000101-02-0	Training	2.39223	0	0	1.46846	6.30445	0	3	2.58856	2.54537
270	0000101-14-4	Training	2.38047	0.467178	0	1.5778	6.1334	2	2	2.41302	2.23485
271	0000101-20-2	Prediction	1.98	0.473431	11.8746	1.82914	6.19236	3	5	1.60974	1.56334
272	0000101-53-1	Training	1.46647	0.629543	0	1.19562	5.83188	0	1	1.79826	2.05523
273	0000101-61-1	Training	2.74	0	0	1.2211	6.20051	0	6	2.33402	2.08524
274	0000101-67-7	Prediction	0.705	0.274106	0	1.05971	6.42487	0	2	2.66815	2.72267
275	0000101-68-8	Training	2.35	0	10.1075	1.55375	6.12468	0	6	1.54594	1.72793
276	0000101-70-2	Prediction	1.885	0.388759	0	1.44043	6.04263	0	6	1.63284	2.19251
277	0000101-77-9	Training	1.04535	0.505218	0	1.29216	5.93225	0	2	1.87817	1.35824
278	0000101-81-5	Training	2.98731	0	0	0.998846	5.72031	0	0	2.65632	2.85767
279	0000101-84-8	Training	2.61861	0	0	1.20883	5.72031	0	2	2.35052	2.1497
280	0000102-06-7	Prediction	0.8	0.550981	0	1.37638	5.92693	0	5	1.47893	1.28034
281	0000102-70-5	Training	0.687182	0	0	1.15855	5.01728	0	3	1.71134	1.37418
282	0000102-71-6	Training	0.0975	0.672083	0	1.48914	5.01728	0	6	0.446152	0.157191
283	0000102-81-8	Training	1.145	0.600017	0	1.20753	5.20949	0	4	1.0289	0.821212
284	0000102-82-9	Prediction	1.32132	0	0	1.03689	5.2933	0	3	1.99573	1.76577
285	0000103-23-1	Training	1.43	0	11.7978	1.19651	6.15486	0	6	1.65995	1.61324
286	0000103-44-6	Training	3.00574	0	0	1.09427	5.10595	0	2	1.91476	1.5825
287	0000103-50-4	Training	2.50336	0	0	1.18191	5.81413	0	2	2.4398	2.23575
288	0000103-64-0	Training	2.265	0	0	1.27178	5.15329	0	0	2.06033	2.12655
289	0000103-69-5	Prediction	1.01171	0.360139	0	1.21924	5.15329	0	2	1.46101	1.23853
290	0000103-83-3	Training	0.952191	0	0	1.1916	5.32301	0	3	1.94046	1.6824
291	0000104-40-5	Training	2.52984	0.609699	0	1.10587	5.72031	0	1	1.77799	2.108
292	0000104-43-8	Training	2.672	0.597888	0	1.07868	5.86647	0	1	1.92355	2.22078
293	0000104-88-1	Training	0.742628	0	10.1311	1.57442	5.25227	1	1	1.5648	1.80396
294	0000105-05-5	Training	2.46865	0	0	0.979869	5.36129	0	0	2.37712	2.57294
295	0000105-06-6	Training	2.48	0	0	1	5.36129	0	0	2.36681	2.55476
296	0000105-67-9	Training	1.95	0.631806	0	1.23639	5.35186	0	1	1.38842	1.65203
297	0000106-37-6	Training	2.16255	0	0	1.45915	5.1299	0	0	1.94561	1.94414
298	0000106-41-2	Prediction	1.653	0.69302	0	1.61433	5.1299	0	1	0.943639	1.1579
299	0000106-42-3	Training	1.20333	0	0	0.991076	5.1299	0	0	2.18517	2.35376
300	0000106-43-4	Prediction	1.74157	0	0	1.28669	5.1299	1	0	2.27086	2.34286
301	0000106-46-7	Training	2.31632	0	0	1.45915	5.1299	2	0	2.41958	2.49591
302	0000106-47-8	Training	0.562076	0.52612	0	1.59167	5.1299	1	1	1.39052	1.00243
303	0000106-48-9	Training	1.34273	0.69362	0	1.61433	5.1299	1	1	1.17991	1.31066
304	0000106-49-0	Training	0.61	0.526806	0	1.2533	5.1299	0	1	1.3259	1.19655
305	0000106-50-3	Training	1.805	0.540694	0	1.40564	5.1299	0	2	1.13227	0.763366
306	0000106-93-4	Training	0.608058	0	0	1.5	3.29584	0	0	0.448771	0.349568
307	0000107-02-8	Prediction	2.54	0	9.05556	1.40564	3.29584	0	1	-0.100959	-0.585589
308	0000107-05-1	Prediction	0.353257	0	0	1.35164	3.29584	0	0	0.5247	0.61623
309	0000107-06-2	Training	0.3	0	0	1.5	3.29584	0	0	0.448771	0.349568
310	0000107-13-1	Prediction	1.5	0	0	1.44882	3.29584	0	1	0.375806	0.311518
311	0000107-21-1	Training	-0.5	0.838889	0	1.37095	3.29584	0	2	-0.680198	-0.662471
312	0000107-39-1	Prediction	2.81666	0	0	0.918296	5.05625	0	0	2.16315	2.43111
313	0000107-66-4	Training	0.426667	0.580727	11.1981	1.47779	5.44242	0	2	0.682375	0.808383
314	0000108-00-9	Prediction	0.25	0.479444	0	1.22439	4.29046	0	4	0.423951	0.374356
315	0000108-36-1	Training	2.29667	0	0	1.45915	5.14166	0	0	1.95508	1.95498
316	0000108-38-3	Prediction	1.20333	0	0	0.991076	5.14166	0	0	2.19464	2.44379
317	0000108-39-4	Prediction	1.22667	0.682083	0	1.27178	5.14166	0	1	1.14142	1.68402
318	0000108-42-9	Training	0.328571	0.519707	0	1.59167	5.14166	1	1	1.4076	0.99928
319	0000108-43-0	Training	1.11381	0.681096	0	1.61433	5.14166	1	1	1.20426	1.29212
320	0000108-45-2	Training	0.800508	0.540694	0	1.40564	5.14166	0	2	1.14173	0.771186
321	0000108-57-6	Training	2.54	0	0	1	5.37064	0	0	2.37433	2.56297
322	0000108-60-1	Training	0.6973	0	0	1.50997	4.97673	0	2	1.59802	1.38692
323	0000108-67-8	Training	2.40398	0	0	0.985228	5.35186	0	0	2.36678	2.55979
324	0000108-70-3	Training	3.32008	0	0	1.5	5.35186	3	0	2.81428	3.40568
325	0000108-78-1	Training	0.18	0.671806	0	1.52193	5.35186	0	9	0.401459	0.0838333
326	0000108-80-5	Training	-0.65	0	10.0489	1.58496	5.35186	0	9	0.613793	0.614592
327	0000108-86-1	Training	1.49272	0	0	1.32501	4.89035	0	0	1.82149	1.83551
328	0000108-87-2	Prediction	2.33252	0	0	0.918296	4.89035	0	0	2.02965	2.28308
329	0000108-88-3	Prediction	1.505	0	0	0.996792	4.89035	0	0	1.98947	2.21818
330	0000108-90-7	Training	1.71093	0	0	1.32501	4.89035	1	0	2.05847	1.97987
331	0000108-95-2	Prediction	1.35143	0.722083	0	1.31432	4.89035	0	1	0.869881	1.48412
332	0000108-99-6	Prediction	0.97	0	0	1.29584	4.89035	0	2	1.6381	1.50581
333	0000109-02-4	Training	1	0	0	1.41085	4.89035	0	5	1.28175	1.00603
334	0000109-06-8	Training	0.49	0	0	1.29584	4.89035	0	2	1.6381	1.35358
335	0000109-09-1	Training	1.41571	0	0	1.67674	4.89035	1	2	1.68014	1.24643
336	0000109-69-3	Training	1.2148	0	0	1.19812	3.7612	0	0	0.977769	0.861255
337	0000109-70-6	Training	0.72	0	0	1.61719	3.7612	0	0	0.763286	0.648988
338	0000110-00-9	Prediction	0.503763	0	0	1.39215	4.39445	0	2	1.18974	1.05344
339	0000110-02-1	Training	0.737535	0	0	1.39215	4.39445	0	2	1.18974	0.865962
340	0000110-16-7	Prediction	1	0.887014	9.55361	1.58496	4.77912	0	4	-0.377883	0.532969
341	0000110-30-5	Training	0.393333	0.310837	12.0266	1.13465	6.51471	0	6	1.59928	1.37367
342	0000110-81-6	Training	1.69	0	0	1.29879	4.07754	0	2	0.982485	0.579362
343	0000110-82-7	Training	1.95877	0	0	0.918296	4.57471	0	0	1.77564	1.87447
344	0000110-83-8	Prediction	1.615	0	0	0.954434	4.57471	0	0	1.75715	1.96085
345	0000110-85-0	Prediction	0.22095	0.338889	0	1.29879	4.57471	0	4	0.781615	0.80387
346	0000110-86-1	Prediction	1.94	0	0	1.34859	4.57471	0	2	1.35709	1.21603
347	0000110-91-8	Prediction	0.0726029	0.370139	0	1.4716	4.57471	0	4	0.656043	0.659407
348	0000110-98-5	Training	0.392743	0.639592	0	1.32497	4.90527	0	4	0.676966	0.459224
349	0000111-27-3	Prediction	-0.272	0.688203	0	1.11552	4.31749	0	1	0.550882	1.33416
350	0000111-40-0	Training	0.383215	0.485556	0	1.2789	4.31749	0	4	0.410547	0.126217
351	0000111-41-1	Training	0.0761066	0.729657	0	1.45742	4.31749	0	4	0.0291561	-0.183349
352	0000111-44-4	Prediction	1.00987	0	0	1.64022	4.31749	0	2	1.00084	0.951944
353	0000111-76-2	Training	-0.22	0.735078	0	1.24067	4.51086	0	3	0.388425	0.23461
354	0000111-84-2	Training	3.15	0	0	0.893571	4.67283	0	0	1.86725	1.99604
355	0000111-94-4	Training	-0.262433	0.378889	0	1.45915	4.67283	0	4	0.73098	0.500038
356	0000112-24-3	Prediction	0.2	0.47157	0	1.28705	4.81218	0	6	0.622763	0.536993
358	0000112-40-3	Training	2.53837	0	0	0.899744	5.04343	0	0	2.16233	2.35583
359	0000112-41-4	Training	3.4	0	0	0.918296	5.04343	0	0	2.15283	2.33885
360	0000113-00-8	Training	-1	0.769444	0	1.35164	3.61092	0	3	-0.433415	-0.514441
361	0000115-28-6	Training	-0.072	0.474523	11.82	1.91317	6.73221	0	4	1.39108	0.997125
362	0000115-29-7	Training	2.29561	0	11.7992	2.07171	6.74406	0	2	2.08273	2.31594
363	0000115-32-2	Training	3.68262	0.0891018	0	1.63585	6.44731	2	1	3.18428	3.04859
364	0000115-77-5	Prediction	-0.0297518	0.651389	0	1.40998	5.1985	0	4	0.855409	0.799538
365	0000115-86-6	Training	2.62769	0	13.1782	1.51998	6.42162	0	3	1.93051	2.09495
366	0000115-90-2	Prediction	1.68	0	11.4887	1.77098	6.08904	0	5	1.42916	1.75809
367	0000115-96-8	Prediction	0.143229	0	12.0012	1.95874	5.56452	0	3	1.08105	1.24112
368	0000117-18-0	Training	3.0068	0	10.8413	1.98523	5.90536	4	1	2.55195	2.41682
369	0000117-79-3	Training	1.92824	0.531842	12.198	1.47612	6.35437	0	3	1.32095	0.991101
370	0000117-80-6	Training	4.04	0	11.8295	1.65774	6.09357	0	2	1.76947	1.90801
371	0000117-81-7	Training	2.1692	0	12.5698	1.23439	6.43133	0	6	1.82052	1.73784
372	0000117-84-0	Training	2.66667	0	12.3518	1.23439	6.34388	0	6	1.76215	1.69415
373	0000118-44-5	Training	2.54579	0.317569	0	1.19562	5.85507	0	2	2.08842	2.13981
374	0000118-69-4	Training	2.835	0	0	1.42947	5.37064	2	0	2.6285	2.80891
375	0000118-74-1	Prediction	3.88382	0	0	1	5.85507	6	0	4.18609	4.53455
376	0000118-79-6	Prediction	2.51253	0.562233	0	1.77586	5.54126	0	1	1.3474	1.08913
377	0000118-82-1	Prediction	2.42833	0.194957	0	1.12087	6.93634	0	2	3.14249	2.66249
378	0000118-83-2	Training	2.42914	0	10.2986	2.25445	5.97381	1	1	1.78818	2.00067
379	0000118-91-2	Training	0.6	0.741373	10.4479	1.68948	5.45959	1	2	0.675293	1.1849
380	0000118-96-7	Training	0.643	0	10.5318	1.93871	6.07993	0	3	1.58702	1.60718
381	0000119-06-2	Prediction	1.17	0	12.5971	1.16062	6.59167	0	6	1.9858	1.99755
382	0000119-12-0	Training	1.53262	0	12.0014	1.88053	6.38182	0	7	1.38212	1.55056
383	0000119-33-5	Training	1.61345	0.683056	10.2195	1.72227	5.60947	0	2	0.624017	0.853986
384	0000119-47-1	Training	2.3698	0.267021	0	1.16549	6.67582	0	2	2.82439	2.76166
385	0000119-56-2	Training	1.6869	0.413255	0	1.38661	5.96358	1	1	2.30045	2.11095
386	0000119-61-9	Training	0.934123	0	11.8463	1.19642	5.86647	0	1	1.92105	1.20924
387	0000119-64-2	Prediction	2.48	0	0	0.99403	5.57215	0	0	2.53955	2.79275
388	0000119-93-7	Training	1.61244	0.475224	0	1.27178	6.11147	0	2	2.06846	1.50677
389	0000120-12-7	Prediction	3.03433	0	0	0.979869	6.07074	0	0	2.94803	3.16334
390	0000120-52-5	Training	0.495126	0	11.8051	1.57839	6.48768	0	6	1.73193	1.91999
391	0000120-54-7	Prediction	1.11774	0	0	1.64773	6.14633	0	10	1.67543	1.64875
392	0000120-71-8	Training	0.917	0.531944	0	1.43738	5.45959	0	3	1.29257	0.89893
393	0000120-78-5	Prediction	1.19598	0	0	1.68939	6.44095	0	10	1.89119	1.95497
394	0000120-82-1	Training	2.94404	0	0	1.5	5.35186	3	0	2.81428	3.40568
395	0000120-95-6	Training	2.63	0.407178	0	1.09577	6.20859	0	1	2.41671	2.07671
396	0000121-03-9	Prediction	0.105	0.611361	10.9096	1.96791	5.96358	0	2	0.830423	0.939113
397	0000121-14-2	Training	0.852343	0	10.3795	1.87102	5.80212	0	2	1.50565	1.28121
398	0000121-44-8	Training	0.196	0	0	1.09065	4.57471	0	3	1.38994	0.915184
399	0000121-57-3	Prediction	0.035	0.644842	10.6071	1.95236	5.64545	0	2	0.559257	0.833214
400	0000121-69-7	Training	0.96557	0	0	1.21924	5.25227	0	3	1.86939	1.61403
401	0000121-73-3	Training	1.94907	0	10.1769	1.98523	5.43372	1	1	1.49804	1.67863
402	0000121-75-5	Prediction	0.994439	0	11.9618	1.78899	6.02345	0	9	0.944444	1.10239
403	0000121-82-4	Training	0.530465	0	10.3236	1.95021	5.95324	0	6	1.19316	1.41162
404	0000121-86-8	Prediction	1.69	0	10.2882	1.90151	5.59471	1	1	1.66432	2.02122
405	0000121-92-6	Training	0.45	0.778676	10.3531	1.77798	5.65948	0	3	0.415614	0.667941
406	0000122-14-5	Training	1.82705	0	10.6693	1.99045	6.10256	0	4	1.47201	1.65954
407	0000122-20-3	Prediction	-0.73	0.520156	0	1.39561	5.50939	0	6	1.07054	0.941075
408	0000122-34-9	Training	1.48934	0.446169	0	1.67263	5.67332	1	10	0.988929	1.24215
409	0000122-39-4	Training	2.007	0.381389	0	1.20691	5.72031	0	2	1.89837	1.56594
410	0000122-57-6	Prediction	0.745	0	10.5303	1.22858	5.38907	0	1	1.59292	1.0926
411	0000122-80-5	Training	0.355	0.539499	10.5557	1.57235	5.4848	0	4	0.554131	0.64285
412	0000123-30-8	Training	1.625	0.708194	0	1.56281	5.1299	0	2	0.852818	0.568325
413	0000123-31-9	Training	1.585	0.722083	0	1.44882	5.1299	0	2	0.894658	0.657856
414	0000123-33-1	Prediction	-0.2	0	10.1092	1.92193	5.1299	0	4	0.755204	0.854313
415	0000123-48-8	Training	3.29	0	0	0.918296	5.63121	0	0	2.62584	2.85773
416	0000123-63-7	Training	0.04625	0	0	1.37878	5.35186	0	6	1.57039	1.31601
417	0000123-77-3	Prediction	1.175	0.775069	9.65778	1.9183	4.77912	0	6	-0.619543	0.426125
418	0000123-91-1	Training	-0.272257	0	0	1.37878	4.57471	0	4	1.14331	0.821071
419	0000124-11-8	Prediction	2.17897	0	0	0.918296	4.67283	0	0	1.8546	2.08197
420	0000124-64-1	Prediction	1.97	0.608865	0	1.58186	5.1985	0	4	0.81796	0.726507
421	0000124-73-2	Training	1.565	0	0	1.5	5.273	0	0	2.03986	2.04123
422	0000126-30-7	Training	0.230541	0.651389	0	1.26744	4.84419	0	2	0.841556	0.690797
423	0000126-33-0	Training	0.581429	0	10.5787	1.64022	5.15329	0	2	1.09066	0.854654
424	0000126-58-9	Training	0.31	0.556328	0	1.41416	5.96871	0	8	1.18937	0.789768
425	0000126-72-7	Training	1.41658	0	12.8663	1.96807	6.01859	0	3	1.39402	1.49275
426	0000126-73-8	Training	1.2945	0	12.2944	1.38212	5.73334	0	3	1.49586	1.49963
427	0000127-18-4	Prediction	1.71746	0	0	0.918296	4.46591	0	0	1.68808	1.8847
428	0000127-20-8	Training	0.651362	0.73858	10.1026	1.93626	4.93447	0	2	-0.0882275	0.381962
429	0000127-27-5	Training	1.84866	0.411453	11.9548	1.1688	6.71052	0	2	2.02043	1.70766
430	0000127-68-4	Prediction	0.46366	0.651361	10.6888	2.01831	5.83773	0	2	0.667992	0.874564
431	0000127-90-2	Training	2.66647	0	0	1.77234	5.86079	0	2	2.17516	2.10506
432	0000128-37-0	Training	3.20018	0.329306	0	1.10587	6.20456	0	1	2.50082	2.54336
433	0000128-39-2	Training	2.82	0.357083	0	1.11728	6.1203	0	1	2.39417	2.28751
434	0000129-00-0	Prediction	2.8858	0	0	0.961237	6.38182	0	0	3.2079	3.37471
435	0000129-43-1	Training	1.88499	0.548155	12.1621	1.36154	6.36819	0	3	1.3733	1.04279
436	0000130-13-2	Training	0.961429	0.557869	11.221	1.81398	6.15486	0	2	1.10953	0.927351
437	0000131-09-9	Training	2.33024	0	12.2717	1.46186	6.35437	1	2	2.29222	2.47971
438	0000131-11-3	Training	1.76	0	11.2246	1.48336	5.83188	0	6	1.2848	1.33266
439	0000131-52-2	Training	2.09164	0.483558	0	1.61433	5.85507	5	1	2.961	2.54392
440	0000131-55-5	Training	0.022	0.64159	12.0273	1.48826	6.24804	0	5	0.909853	0.900048
441	0000131-57-7	Prediction	1.94874	0.543433	12.0659	1.37255	6.12468	0	4	1.08346	1.09185
442	0000132-64-9	Prediction	3.27605	0	0	1.20091	6.05678	0	2	2.62535	2.513
443	0000132-65-0	Training	3.26452	0	0	1.20091	6.05678	0	2	2.62535	2.43926
444	0000134-32-7	Training	1.44115	0.498125	0	1.2345	5.72685	0	1	1.84998	1.53972
445	0000134-47-4	Training	1.06	0.525947	12.4622	1.8685	7.00941	0	9	1.04474	0.932247
446	0000134-62-3	Training	0.350532	0	11.8851	1.32496	5.80814	0	4	1.50871	1.52061
447	0000135-88-6	Training	2.33035	0.352398	0	1.17003	6.1591	0	2	2.30479	2.2853
448	0000137-26-8	Prediction	0.527715	0	0	1.72957	5.42495	0	10	1.05302	1.00497
449	0000137-30-4	Training	2.31	0.29405	0	1.66918	4.46591	0	5	0.458605	0.715543
450	0000139-13-9	Training	1.75	0.786454	10.1452	1.75266	5.50939	0	9	-0.284967	0.364392
451	0000139-87-7	Training	0.54	0.672083	0	1.41358	4.89035	0	5	0.481837	0.227761
452	0000140-66-9	Prediction	1.73667	0.580419	0	1.11728	6.03309	0	1	2.05864	2.27002
453	0000141-78-6	Training	1.48	0	9.82153	1.37878	4.29046	0	3	0.47267	0.167835
454	0000141-93-5	Training	2.78784	0	0	0.979869	5.37064	0	0	2.38464	2.58115
455	0000142-96-1	Training	1.90385	0	0	1.08605	4.67283	0	2	1.57042	1.15011
456	0000143-50-0	Training	3.1672	0	13.8247	1.22858	7.41035	0	1	3.03801	2.59627
457	0000144-19-4	Prediction	-0.222879	0.555833	0	1.19812	5.42495	0	2	1.45793	1.33243
458	0000145-73-3	Training	1	0.673333	10.763	1.531	6.07074	0	6	0.67807	0.829838
459	0000148-24-3	Training	1.115	0.625625	0	1.49321	5.72685	0	3	1.36776	1.00843
460	0000149-30-4	Training	0.4	0	0	1.68939	5.65948	0	5	1.75813	1.80134
461	0000151-21-3	Training	0.0759091	0.693634	10.3731	1.39764	5.64545	0	1	0.897249	0.774947
462	0000152-11-4	Training	1.27687	0	0	1.39196	6.79459	0	12	2.12968	1.45203
463	0000156-43-4	Training	0.58	0.536567	0	1.43738	5.34233	0	3	1.19272	0.820644
464	0000184-90-8	Prediction	1.295	0	10.8324	1.41274	5.83188	0	3	1.64003	1.75669
465	0000198-55-0	Prediction	2.38	0	0	0.954434	6.66058	0	0	3.43571	3.53971
466	0000206-44-0	Prediction	3.322	0	0	0.961237	6.39859	0	0	3.2214	3.38478
467	0000208-96-8	Prediction	2.76027	0	0	0.970951	6.01859	0	0	2.91063	3.13524
468	0000217-59-4	Training	2.41	0	0	0.970951	6.44731	0	0	3.25563	3.40252
469	0000218-01-9	Prediction	2.4	0	0	0.970951	6.42811	0	0	3.24018	3.39525
470	0000218-17-8	Prediction	0.46	0	11.5419	1.77313	5.85507	0	5	1.23684	1.4994
471	0000218-21-0	Training	0	0	11.5149	1.72804	5.68698	0	5	1.12613	1.17606
472	0000225-11-6	Training	2.025	0	0	1.14968	6.4151	0	2	2.93991	2.72566
473	0000226-36-8	Prediction	2.46485	0	0	1.11944	6.67077	0	2	3.16113	2.95076
474	0000260-94-6	Training	2.37	0	0	1.1916	6.07074	0	2	2.64134	2.45183
475	0000262-12-4	Training	3.85	0	0	1.32218	6.07074	0	4	2.37619	2.27974
476	0000271-89-6	Training	2.56	0	0	1.27291	5.50939	0	2	2.14799	1.94812
477	0000280-57-9	Prediction	0.69	0	0	1.29546	5.40717	0	6	1.65754	1.49247
478	0000281-23-2	Prediction	3.42	0	0	0.961237	5.88888	0	0	2.81122	3.05346
479	0000294-62-2	Training	3.53376	0	0	0.918296	5.26269	0	0	2.32928	2.54158
480	0000298-00-0	Training	1.11908	0	10.4485	2.05317	5.99396	0	4	1.36468	1.49549
481	0000298-02-2	Prediction	1.95	0	0	1.71045	5.50126	0	5	1.62003	1.77506
482	0000298-04-4	Prediction	2.08222	0	0	1.66665	5.56452	0	5	1.69335	1.83694
483	0000298-06-6	Training	0.358333	0.311975	0	1.81924	5.11799	0	2	1.18275	1.25606
484	0000298-07-7	Training	0.586557	0.428414	12.0368	1.31584	6.01859	0	2	1.36369	1.0713
485	0000299-84-3	Training	2.09112	0	0	2.18872	6.06146	3	3	2.73534	2.35368
486	0000300-76-5	Training	0.93	0	11.7643	2.33935	5.75257	0	3	1.05063	1.03507
487	0000306-52-5	Training	0.145067	0.694208	10.3281	2.18201	5.38907	0	1	0.291287	-0.295705
488	0000306-83-2	Prediction	1.355	0	0	1.90564	4.93447	0	0	1.55983	1.57273
489	0000306-98-9	Training	3.92	0	0	0.918296	6.99668	0	0	3.72468	3.76029
490	0000307-34-6	Training	3.59	0	0	0.890492	6.89467	0	0	3.65682	3.72777
491	0000307-55-1	Training	3.08111	0.93682	9.85471	1.32526	7.28139	0	2	1.89125	2.39797
492	0000307-70-0	Training	3.355	0.844806	0	1.48958	7.10414	0	1	2.41589	2.82639
493	0000309-00-2	Training	2.43578	0	0	1.52623	6.84268	0	0	3.28961	3.31527
495	0000314-40-9	Training	0.706287	0	11.7922	1.79471	5.96358	0	7	1.101	1.14792
496	0000315-18-4	Prediction	1.41667	0.564019	11.0789	1.49693	6.02345	0	8	0.571604	0.96328
497	0000318-98-9	Training	2.2875	0.438972	0	1.36596	6.1717	0	5	1.81432	1.74901
498	0000319-84-6	Prediction	2.78649	0	0	1.58496	5.85507	0	0	2.46479	2.56416
499	0000320-60-5	Training	2.42404	0	0	1.82947	5.80212	2	0	2.771	2.4849
500	0000328-84-7	Prediction	3.095	0	0	1.82947	5.78383	2	0	2.75628	2.5395
501	0000330-54-1	Training	1.24053	0.463465	11.3468	1.84544	5.82008	2	6	1.00658	0.880992
502	0000330-55-2	Prediction	1.06586	0.505965	11.4531	1.93391	5.88332	2	6	0.955844	1.02438
503	0000333-41-5	Training	1.86678	0	0	1.7716	6.18002	0	7	1.93663	2.11102
504	0000335-36-4	Training	3.4675	0	0	1.12386	6.9613	0	2	3.39267	3.10291
505	0000335-57-9	Training	3.5	0	0	0.886541	6.7511	0	0	3.54331	3.65186
506	0000335-67-1	Prediction	2.116	0.944167	9.7233	1.44646	6.82979	0	2	1.46431	2.16256
507	0000335-76-2	Prediction	3.58833	0.939583	9.80095	1.37719	7.08087	0	2	1.70298	2.3358
508	0000335-99-9	Training	1.36	0.851235	0	1.64034	6.53524	0	1	1.87328	2.16602
509	0000346-10-1	Training	1.976	0.730456	13.0844	1.70183	7.19968	0	9	1.0059	0.969047
510	0000351-00-2	Training	0.1	0.583829	12.8211	1.99157	6.95559	0	8	0.949059	0.888774
511	0000355-80-6	Training	0.97	0.859297	0	1.74717	6.05209	0	1	1.42021	1.64215
512	0000360-97-4	Training	0.715	0.677431	10.3538	1.80624	5.38907	0	7	-0.0928487	0.497674
513	0000375-95-1	Prediction	3.4	0.941563	9.766	1.40915	6.96319	0	2	1.5915	2.2545
514	0000376-06-7	Prediction	4.03125	0.935026	9.8941	1.28477	7.44833	0	2	2.04628	2.59059
515	0000402-31-3	Prediction	2.51	0	0	1.53049	5.98896	0	0	2.60041	2.71036
516	0000461-58-5	Prediction	0.086	0.763819	0	1.52193	4.29046	0	5	-0.165358	-0.085918
517	0000462-08-8	Prediction	-0.19	0.571944	0	1.46048	4.89035	0	3	0.775132	0.703301
518	0000471-77-2	Training	2.13704	0.414209	11.9526	1.1688	6.67834	0	2	1.99138	1.67997
519	0000473-54-1	Training	0.83	0.309167	0	1.12426	6.0845	0	1	2.41872	2.48203
520	0000475-03-6	Prediction	3.33	0	0	0.981152	6.01372	0	0	2.90148	3.12395
521	0000479-27-6	Training	0.750918	0.498125	0	1.34859	5.86647	0	2	1.80478	1.26916
522	0000482-89-3	Prediction	0.456903	0.439796	12.3678	1.53291	6.56103	0	6	1.2607	1.13177
523	0000488-23-3	Training	2.82	0	0	0.979869	5.54908	0	0	2.52823	2.73416
524	0000492-97-7	Training	3.55	0	0	1.40564	5.57215	0	4	1.93224	1.82278
525	0000493-01-6	Training	3.33307	0	0	0.940286	5.57215	0	0	2.56706	2.78911
526	0000496-10-6	Training	2.91	0	0	0.942683	5.50939	0	0	2.51532	2.73439
527	0000497-18-7	Prediction	0.65	0.720833	9.70833	1.62581	4.31749	0	3	-0.482205	0.459789
528	0000500-28-7	Prediction	0.571359	0	10.6955	2.23356	6.10256	1	4	1.58313	2.0264
529	0000504-03-0	Training	0.2	0.196528	0	1.12118	5.14166	0	2	1.69623	1.32556
530	0000504-24-5	Training	0.347069	0.560694	0	1.46048	4.89035	0	3	0.788498	0.491816
531	0000504-29-0	Training	1.05267	0.59625	0	1.46048	4.89035	0	3	0.746254	0.477231
532	0000504-53-0	Training	1.22	0	12.1109	0.98665	6.32615	0	1	2.38376	1.84045
533	0000509-34-2	Training	0.46	0	13.0147	1.39684	7.07918	0	11	1.7384	1.36864
534	0000510-15-6	Training	2.0003	0.256856	12.384	1.58477	6.41182	2	4	2.00284	2.65456
535	0000512-34-5	Training	0.54	0.697664	10.2956	1.21702	5.42495	0	2	0.712569	1.23161
536	0000512-56-1	Training	-0.179228	0	10.7762	1.65898	5.03044	0	3	0.872156	0.730267
537	0000514-10-3	Prediction	1.90184	0.418654	11.942	1.1688	6.67834	0	2	1.98669	1.80745
538	0000520-45-6	Training	2.12012	0.645208	10.9548	1.52193	5.77144	0	5	0.563868	0.766729
539	0000526-73-8	Prediction	2.31599	0	0	0.985228	5.37064	0	0	2.38189	2.64014
540	0000526-78-3	Training	0.335597	0.736366	10.2777	1.95021	5.31321	0	4	0.00407191	0.437216
541	0000527-20-8	Training	2.94	0.418558	0	1.7274	5.85507	5	1	2.98036	2.78685
542	0000527-60-6	Prediction	0.867312	0.569306	0	1.20721	5.54126	0	1	1.63003	1.78945
543	0000534-52-1	Prediction	0.129038	0.644649	10.3718	1.88338	5.92693	0	3	0.735107	0.904895
544	0000535-77-3	Prediction	2.9265	0	0	0.979869	5.43372	0	0	2.4354	2.69556
545	0000538-75-0	Training	0.124	0	0	1.20369	5.81413	0	4	2.23033	2.03119
546	0000540-84-1	Training	2.785	0	0	0.890492	5.05625	0	0	2.17738	2.3765
547	0000541-73-1	Training	2.48135	0	0	1.45915	5.14166	2	0	2.42905	2.50822
548	0000542-18-7	Prediction	2.34619	0	0	1.19417	4.89035	0	0	1.88845	2.0575
549	0000544-01-4	Training	2.63808	0	0	1.06479	5.11799	0	2	1.93954	1.59466
550	0000544-76-3	Training	1.24875	0	0	0.904381	5.38907	0	0	2.4381	2.66647
551	0000554-00-7	Training	1.56092	0.493326	0	1.7274	5.35186	2	1	1.77562	1.46135
552	0000554-84-7	Training	1.4	0.715972	10.0476	1.78194	5.43372	0	2	0.422409	0.75072
553	0000555-03-3	Training	1.25994	0	10.2191	1.72227	5.52545	0	3	1.26881	1.14351
554	0000563-04-2	Training	2.84286	0	13.5121	1.45933	6.59167	0	3	2.08	2.23011
555	0000567-77-6	Prediction	2.69	0	0	0.99403	5.36129	0	0	2.36987	2.62515
556	0000575-41-7	Training	3.13154	0	0	1	5.84932	0	0	2.75955	2.95815
557	0000576-24-9	Training	1.71985	0.617052	0	1.73815	5.37064	2	1	1.63823	1.75832
558	0000577-11-7	Training	0.542222	0.461096	12.2231	1.41544	6.39859	0	7	1.07362	0.876287
559	0000577-55-9	Training	2.14	0	0	0.970951	5.69373	0	0	2.6492	2.86087
560	0000579-10-2	Training	0.698378	0	10.8701	1.43293	5.51745	0	4	1.27543	1.2827
561	0000579-66-8	Training	2.08	0.438194	0	1.1688	5.57215	0	1	1.83032	1.41206
562	0000581-40-8	Training	2.71	0	0	1	5.83773	0	0	2.75022	2.94918
563	0000583-39-1	Prediction	0.419932	0.446301	0	1.68948	5.65948	0	5	1.22783	1.32898
564	0000583-53-9	Training	3.1	0	0	1.45915	5.15329	0	0	1.96443	1.96568
565	0000583-78-8	Training	1.18282	0.617052	0	1.73815	5.35186	2	1	1.62312	1.74392
566	0000584-79-2	Prediction	2.265	0	12.4801	1.25836	6.57786	0	4	2.12943	2.30907
567	0000584-84-9	Training	2.45	0	9.99602	1.71955	5.68017	0	6	1.10951	1.23392
568	0000586-76-5	Training	1.005	0.761008	10.3313	1.68948	5.42495	0	2	0.393531	0.87622
569	0000591-20-8	Training	1.47082	0.680231	0	1.61433	5.14166	0	1	0.968301	0.974718
570	0000591-27-5	Training	1.148	0.702083	0	1.56281	5.14166	0	2	0.869547	0.583772
571	0000591-35-5	Training	2.16716	0.640108	0	1.73815	5.35186	2	1	1.59572	1.82135
572	0000599-61-1	Training	0.465	0.519499	12.3753	1.75318	6.20859	0	4	0.967565	0.772658
573	0000599-64-4	Training	2.275	0.588727	0	1.16865	6.12468	0	1	2.09619	2.15615
574	0000603-11-2	Training	0.288757	0.755621	10.6837	1.76596	6.00389	0	5	0.509783	0.740198
575	0000605-02-7	Training	3.51	0	0	0.985228	6.1591	0	0	3.01639	3.19858
576	0000606-20-2	Training	1.34154	0	10.3795	1.87102	5.826	0	2	1.52486	1.30151
577	0000606-28-0	Training	1.32738	0	12.2797	1.36096	6.17587	0	4	1.76446	1.84633
578	0000607-99-8	Training	2.735	0	0	1.749	5.63835	0	2	2.00811	1.91172
579	0000608-71-9	Training	0.79	0.478529	0	1.61433	5.85507	0	1	1.78205	1.21918
580	0000608-93-5	Prediction	3.81084	0	0	1.32501	5.70711	5	0	3.66369	4.28092
581	0000609-89-2	Prediction	1.38091	0.618326	10.4081	2.10559	5.7589	2	2	1.08857	1.36561
582	0000610-39-9	Training	1.37286	0	10.3795	1.87102	5.81413	0	2	1.51531	1.29143
583	0000611-06-3	Training	1.99526	0	10.3781	2.07416	5.60947	2	1	1.81986	1.99433
584	0000611-21-2	Prediction	0.686823	0.384444	0	1.21924	5.2832	0	2	1.53668	1.25076
585	0000612-22-6	Training	0.905358	0	10.3862	1.59546	5.55683	0	1	1.54808	0.971308
586	0000613-12-7	Training	2.41	0	0	0.991076	6.15486	0	0	3.00999	3.19084
587	0000615-54-3	Training	2.77752	0	0	1.5	5.35186	0	0	2.10332	2.11327
588	0000615-58-7	Training	1.45	0.627626	0	1.73815	5.35186	0	1	1.13658	0.906146
589	0000615-59-8	Prediction	2.67	0	0	1.42947	5.35186	0	0	2.13941	2.26559
590	0000615-74-7	Training	0.46462	0.61804	0	1.54356	5.35186	1	1	1.48455	1.49239
591	0000616-44-4	Training	0.668638	0	0	1.32501	4.76217	0	2	1.52002	1.22483
592	0000618-62-2	Prediction	2.16999	0	10.3473	2.07416	5.59471	2	1	1.80968	2.08513
593	0000620-92-8	Training	1.075	0.629543	0	1.3058	5.93225	0	2	1.72347	1.41695
594	0000622-24-2	Training	1.865	0	0	1.25163	5.15329	0	0	2.07064	2.14414
595	0000622-57-1	Training	0.653717	0.34625	0	1.1916	5.34233	0	2	1.64379	1.37361
596	0000622-97-9	Training	1.5	0	0	0.998001	5.25227	0	0	2.2801	2.45942
597	0000623-26-7	Training	0.45848	0	0	1.37878	5.36129	0	2	1.97463	1.78697
598	0000626-17-5	Training	0.864328	0	0	1.37878	5.37064	0	2	1.98215	1.79573
599	0000626-23-3	Prediction	0.475	0.165278	0	1.06769	4.97673	0	2	1.62801	1.23439
600	0000626-39-1	Prediction	3.84883	0	0	1.5	5.35186	0	0	2.10332	2.21057
601	0000626-67-5	Prediction	0.84471	0	0	1.14115	4.89035	0	3	1.6181	1.40341
602	0000629-25-4	Training	2.406	0.719384	10.2064	1.16744	5.3033	0	2	0.619159	1.25484
603	0000629-62-9	Training	1.364	0	0	0.903454	5.31321	0	0	2.37753	2.60054
604	0000634-66-2	Prediction	3.681	0	0	1.45915	5.54908	4	0	3.23088	3.79427
605	0000634-67-3	Prediction	2.094	0.472339	0	1.78845	5.54908	3	1	2.165	2.28637
606	0000634-83-3	Prediction	2.45	0.451351	0	1.78845	5.70711	4	1	2.5541	2.74684
607	0000634-90-2	Prediction	2.94312	0	0	1.45915	5.54126	4	0	3.22459	3.78984
608	0000634-91-3	Training	2.42	0.484144	0	1.78845	5.54126	3	1	2.14469	2.1962
609	0000634-93-5	Training	2.18821	0.460533	0	1.78845	5.54126	3	1	2.17274	2.19353
610	0000636-28-2	Training	2.92442	0	0	1.45915	5.53339	0	0	2.27031	2.31139
611	0000636-30-6	Training	2.205	0.472339	0	1.78845	5.53339	3	1	2.15238	2.18261
612	0000647-42-7	Training	1.76	0.791389	0	1.65432	6.64769	0	1	2.02771	2.08077
613	0000678-39-7	Training	2.765	0.786806	0	1.58028	6.94216	0	1	2.30802	2.36965
614	0000680-31-9	Prediction	-0.043	0	12.2137	1.57097	5.63121	0	6	1.02399	1.11974
615	0000696-44-6	Training	0.788262	0.395694	0	1.21924	5.26269	0	2	1.5068	1.01482
616	0000698-83-6	Prediction	1.56	0.708058	11.6944	2.06879	6.12468	1	8	0.392333	0.810548
617	0000709-98-8	Training	1.945	0.43916	11.0899	1.77495	5.71373	2	3	1.29759	1.24052
618	0000729-33-5	Prediction	2.63	0.352189	0	1.58942	6.59715	1	4	2.48158	2.92152
619	0000731-27-1	Training	1.95	0	12.5165	2.20859	6.286	0	4	1.40622	1.60227
620	0000732-11-6	Training	0.522038	0	12.1987	2.01635	6.35437	0	8	1.1805	1.29702
621	0000732-26-3	Prediction	4.17334	0.268081	0	1.07868	6.41182	0	1	2.75426	2.79407
622	0000759-94-4	Training	1.78	0	11.5437	1.43033	5.34233	0	6	0.900411	0.790962
623	0000760-23-6	Training	0.757195	0	0	1.45915	4.31749	0	0	1.29184	1.20045
624	0000764-13-6	Training	2.37385	0	0	0.94566	4.77912	0	0	1.92613	2.05749
625	0000767-00-0	Prediction	0.91	0.708194	0	1.57442	5.25227	0	2	0.945355	0.850131
626	0000779-02-2	Training	3.19	0	0	0.991076	6.18415	0	0	3.03356	3.21132
627	0000782-74-1	Training	3.37313	0.400941	0	1.61433	5.99894	2	2	2.36481	2.55222
628	0000786-19-6	Training	2.768	0	0	1.88721	6.01859	1	5	2.18286	2.05766
629	0000788-59-2	Training	0.76	0.97145	9.648	1.66109	6.47543	0	6	0.644387	0.593732
630	0000789-02-6	Training	3.595	0	0	1.47014	6.32615	2	0	3.37662	3.57757
631	0000800-28-0	Training	2.23	0.374487	12.2543	1.61061	6.58617	0	16	0.333399	1.27392
632	0000801-01-1	Training	1.46	0	0	1.74647	5.87212	0	2	2.19752	2.12657
633	0000803-20-2	Prediction	1.48	0.941354	9.84278	1.61525	6.48768	0	4	0.901058	1.00152
634	0000805-75-8	Prediction	0.36	0.640069	10.1415	1.48914	5.01728	0	7	-0.173659	0.687496
635	0000808-31-5	Prediction	3.13	0	0	1.69825	6.45047	0	2	2.68762	2.70768
636	0000822-77-5	Prediction	0.595	0.471397	0	1.29056	5.32301	0	3	1.32974	1.09148
637	0000827-21-4	Training	0.13	0.594638	10.8687	1.64242	5.80212	0	1	0.988359	0.403705
638	0000829-26-5	Training	3	0	0	0.99901	5.9428	0	0	2.83528	3.03018
639	0000832-69-9	Training	3.18	0	0	0.991076	6.18415	0	0	3.03356	3.21132
640	0000834-12-8	Training	1.17333	0.417138	0	1.57419	5.84354	0	12	0.775474	1.28727
641	0000839-90-7	Training	-0.2	0.650284	11.7748	1.78993	6.17587	0	15	-0.290663	0.386736
642	0000840-65-3	Training	1.58	0	11.3823	1.42947	6.21261	0	6	1.61008	1.71887
643	0000842-18-2	Training	0	0.59201	11.3994	1.83375	6.42811	0	3	1.16975	0.900214
644	0000843-55-0	Training	1.605	0.545131	0	1.2345	6.42487	0	2	2.25669	1.73713
645	0000872-05-9	Training	3.22	0	0	0.918296	4.81218	0	0	1.96674	2.11444
646	0000873-63-2	Training	1.35059	0.66362	0	1.54356	5.26269	1	1	1.35864	1.52906
647	0000875-35-4	Training	0.59	0	0	1.79679	5.63835	2	3	2.35846	1.95017
648	0000877-10-1	Prediction	2.73282	0	0	1.53049	5.85507	4	0	3.44061	3.90969
649	0000877-11-2	Training	2.57144	0	0	1.50582	5.85507	5	0	3.69022	4.31271
650	0000879-39-0	Prediction	1.60409	0	10.7189	1.98523	5.8944	4	1	2.54987	2.46778
651	0000882-33-7	Training	0.905	0	0	1.32501	5.76519	0	2	2.32718	2.1691
652	0000883-20-5	Prediction	2.19453	0	0	0.991076	6.18826	0	0	3.03687	3.2319
653	0000886-50-0	Training	1.95	0.406934	0	1.54244	5.98394	0	12	0.916827	1.47686
654	0000901-44-0	Training	1.185	0.649444	0	1.32587	6.40523	0	6	1.67354	1.2745
655	0000903-19-5	Prediction	2.475	0.259965	0	1.12309	6.63463	0	2	2.82132	2.77997
656	0000909-55-4	Training	2.14333	0	0	0.904381	6.01859	0	0	2.9447	3.16775
657	0000920-66-1	Prediction	0.2739	0.915278	0	1.72957	5.55683	0	1	0.964154	1.49915
658	0000930-10-9	Training	1.5	0.690206	0	1.26956	6.34739	0	17	0.516599	0.623386
659	0000933-12-0	Prediction	2.87	0	0	0.942683	5.43372	0	0	2.45443	2.72691
660	0000935-95-5	Prediction	2.15	0.512022	0	1.73815	5.70711	4	1	2.50776	2.67351
661	0000938-22-7	Training	3.34	0	0	1.77178	5.78996	4	2	3.0664	3.25768
662	0000938-86-3	Training	3.45663	0	0	1.77178	5.78383	4	2	3.06146	3.25341
663	0000944-22-9	Training	1.89	0	0	1.62272	5.78996	0	2	2.19474	2.10211
664	0000944-61-6	Training	4.40001	0	0	1.84644	5.99396	4	4	2.99403	3.42194
665	0000946-30-5	Prediction	0.395714	0.610374	10.9358	2.21885	5.96358	1	2	0.938709	1.03945
666	0000947-04-6	Training	0.244876	0.334036	11.2739	1.23482	5.50126	0	3	1.04384	0.740973
667	0000947-72-8	Training	2.47083	0	0	1.17528	6.18826	1	0	3.17958	3.31882
668	0000948-65-2	Training	2.555	0.364444	0	1.18672	6.10702	0	2	2.24004	2.14063
669	0000950-37-8	Prediction	0.97056	0	11.656	2.22458	6.00881	0	11	0.528253	0.827117
670	0000961-11-5	Prediction	1.66991	0	12.2223	2.03062	6.24028	3	3	2.28684	2.38816
671	0000962-58-3	Training	0.627436	0	12.3714	1.69047	6.18002	0	7	1.29662	1.30917
672	0000986-94-6	Training	2.46	0	10.7645	2.3318	6.3081	2	2	2.12976	2.3044
673	0000990-23-3	Training	1.49	0.307804	12.8897	1.25118	6.99668	0	8	1.68522	1.72564
674	0000991-32-9	Prediction	1.76	0.246731	12.2695	1.16745	6.608	0	4	1.91867	2.27895
675	0000993-52-1	Training	0.26	0	12.4463	1.47815	6.51471	0	12	1.17469	0.89303
676	0000999-73-0	Training	1	0.577228	12.4663	1.92602	6.72022	0	10	0.622256	0.83073
677	0001000-76-6	Training	3.5	0	0	1.66637	6.19236	3	4	3.00886	3.17018
678	0001014-70-6	Training	2.07111	0.427342	0	1.60926	5.7462	0	12	0.667071	1.12767
679	0001024-57-3	Prediction	4.1	0	0	1.72007	6.88244	0	2	3.02407	3.01848
680	0001071-83-6	Training	1.30286	0.82461	10.1752	1.92745	5.22036	0	4	-0.158196	0.411157
681	0001073-72-9	Prediction	0.895	0.669782	0	1.51973	5.25227	0	3	0.919821	0.829067
682	0001074-24-4	Training	3.16	0	0	1.39215	5.53339	0	0	2.3046	2.36715
683	0001116-76-3	Prediction	1.95652	0	0	0.993549	5.96871	0	3	2.56144	2.35046
684	0001120-01-0	Training	1.86	0.680411	10.4466	1.32729	5.84932	0	1	1.10898	1.09383
685	0001141-38-4	Prediction	0.512327	0.712438	10.7257	1.45915	6.1203	0	4	0.908644	1.09591
686	0001163-19-5	Prediction	1.26667	0	0	1.20883	6.61338	0	2	3.06921	2.9085
687	0001190-72-3	Prediction	1.442	0.509258	12.1717	1.89023	6.66058	1	4	1.52152	1.31978
688	0001191-50-0	Training	1.04	0.686267	10.4141	1.35941	5.75257	0	1	1.00951	0.937869
689	0001193-65-3	Training	0.77	0	11.0141	1.43667	5.58725	0	4	1.32176	1.34626
690	0001197-18-8	Training	1.01	0.668168	10.5181	1.44646	5.51745	0	3	0.593201	0.768176
691	0001212-29-9	Training	0.669367	0.149986	0	1.31831	5.92693	0	5	1.98508	1.49449
692	0001222-05-5	Prediction	3.02	0	0	1.10807	6.608	0	2	3.11644	2.91079
693	0001235-13-4	Prediction	0.646667	0.639199	11.7149	1.79971	6.73934	0	6	1.0667	1.11431
694	0001241-94-7	Prediction	2.69472	0	13.303	1.41543	6.40192	0	3	1.96128	2.17005
695	0001300-33-3	Training	0.133333	0.56883	11.2228	1.98212	6.49375	0	4	1.08475	0.838942
696	0001321-74-0	Prediction	2.54757	0	0	1	5.39816	0	0	2.39648	2.65011
697	0001322-93-6	Training	0.407876	0.403924	12.0507	1.44209	6.47235	0	1	1.79172	0.855082
698	0001323-65-5	Prediction	2.29	0.370935	0	1.04346	6.20051	0	1	2.48004	2.3927
699	0001330-16-1	Training	2.61	0	0	0.961237	5.92158	0	0	2.83753	3.0465
700	0001330-78-5	Prediction	2.62796	0	13.6349	1.45933	6.608	0	3	2.08638	2.31536
701	0001420-06-0	Training	3.11	0	0	1.24988	6.67582	0	5	2.80096	2.65099
702	0001445-75-6	Prediction	0	0	11.5137	1.45402	5.45959	0	2	1.38093	1.47726
703	0001460-02-2	Training	3.37275	0	0	0.954434	6.31536	0	0	3.1579	3.33008
704	0001477-55-0	Training	-0.045	0.475139	0	1.32218	5.37064	0	2	1.4466	0.954993
705	0001490-04-6	Prediction	0.981677	0.380278	0	1.09427	5.60947	0	1	1.96731	1.71938
706	0001502-22-3	Training	0.841286	0	11.6527	1.14522	5.826	0	1	1.92535	1.24196
707	0001506-02-1	Prediction	2.78	0	11.7887	1.10807	6.50877	0	1	2.48632	2.22402
708	0001544-19-0	Training	4.35	0	0	1.69828	6.76273	0	4	2.74056	2.82595
709	0001552-42-7	Prediction	3.165	0	13.0957	1.40943	6.9575	0	12	1.53041	1.27665
710	0001570-64-5	Training	1.56815	0.63112	0	1.54356	5.35186	1	1	1.46901	1.52483
711	0001582-09-8	Training	3.30383	0	11.1777	1.96193	6.46303	0	5	1.64952	2.00425
712	0001591-88-5	Training	0.17	0.538331	12.6395	1.94314	6.67582	0	4	1.20941	0.851526
713	0001610-18-0	Training	0.89	0.407509	0	1.54244	5.93225	0	12	0.874547	1.41879
714	0001623-19-4	Training	0.774394	0	11.8033	1.57754	5.56452	0	3	1.28705	1.29678
715	0001631-58-9	Training	1.69121	0	0	1.5288	5.16479	0	5	1.44223	1.30716
716	0001634-04-4	Training	0.18	0	0	1.13497	4.63473	0	2	1.51472	1.11316
717	0001634-78-2	Training	0.399083	0	12.2229	1.73263	6.02345	0	9	0.958901	0.895889
718	0001667-10-3	Training	1.19	0	0	1.29584	6.01859	0	0	2.74435	2.85397
719	0001678-91-7	Training	3.425	0	0	0.918296	5.04343	0	0	2.15283	2.33885
720	0001678-98-4	Training	3.3	0	0	0.918296	5.32301	0	0	2.37782	2.59548
721	0001687-30-5	Training	1.09286	0.673333	10.6059	1.45915	5.69373	0	4	0.618433	0.786393
722	0001689-83-4	Training	1.46	0.578972	0	1.92119	5.62402	0	2	1.22056	0.67361
723	0001689-84-5	Prediction	1.255	0.577407	0	1.92119	5.62402	0	2	1.22242	0.875088
724	0001702-17-6	Training	0	0.74416	10.5558	2.07416	5.60947	2	4	0.628438	0.511958
726	0001712-70-5	Prediction	3.2639	0	0	1.24484	5.42495	1	0	2.52972	2.6477
727	0001740-19-8	Training	1.884	0.427662	11.9286	1.18297	6.67834	0	2	1.96947	1.66611
728	0001746-01-6	Training	3.22162	0	0	1.68582	6.38519	4	4	3.39107	3.62841
729	0001746-81-2	Training	1.3025	0.526953	11.3284	1.82053	5.7589	1	6	0.658692	0.69388
730	0001779-48-2	Training	0.310514	0.648873	10.5178	1.67742	5.25227	0	0	0.582024	0.150365
731	0001805-32-9	Prediction	0.671344	0.642708	0	1.67742	5.45104	2	1	1.70353	2.12674
732	0001806-26-4	Prediction	2.20549	0.614801	0	1.11728	5.66643	0	1	1.72273	2.1654
733	0001817-47-6	Prediction	1.82667	0	10.2876	1.54169	5.65249	0	1	1.65801	1.27589
734	0001825-21-4	Prediction	3.3779	0	0	1.749	5.92693	5	2	3.42526	3.73803
735	0001825-31-6	Training	3.58333	0	0	1.35164	5.86079	2	0	3.06277	3.43508
736	0001827-79-6	Training	2.29	0	0	1.35667	6.71052	0	8	2.47674	2.25219
737	0001828-52-6	Training	1.98	0	0	1.78427	6.7417	2	11	2.45947	1.80035
738	0001829-62-2	Training	1.28	0.491129	12.8469	2.00473	7.78447	0	20	0.528122	1.46635
739	0001835-10-1	Training	0.77	0.625833	11.0145	1.83748	5.78383	0	10	-0.0637465	0.563223
740	0001836-75-5	Prediction	3.3375	0	10.538	1.86682	6.1717	2	3	2.17129	2.3292
741	0001836-77-7	Training	3.05705	0	10.5986	1.92229	6.2634	3	3	2.45034	2.26172
742	0001837-65-7	Prediction	0.52	0.500008	12.7665	1.9351	7.71735	0	12	1.29692	1.35143
743	0001838-38-8	Training	2.18	0.446759	0	1.30524	6.94022	0	10	1.95879	2.40801
744	0001839-48-4	Prediction	2.48	0.394546	14.0483	1.9764	7.44717	8	10	3.20725	1.30158
745	0001839-63-0	Training	3.34	0	0	0.918296	5.35186	0	0	2.40104	2.62097
746	0001840-57-9	Training	1.85	0.452218	14.2886	1.73844	7.49942	0	12	1.19513	1.13697
747	0001843-05-6	Prediction	1.9936	0.463928	12.3631	1.25976	6.34739	0	4	1.39849	1.18084
748	0001844-59-7	Training	1.81	0.390059	13.7599	1.45768	7.11558	1	14	1.17157	1.1032
749	0001846-78-9	Prediction	1.64	0	0	1.69125	7.30182	0	6	2.97966	3.12119
751	0001879-09-0	Training	2.375	0.449306	0	1.14522	5.92693	0	1	2.11468	1.71001
752	0001892-57-5	Prediction	0.18	0	0	1.29872	5.03044	0	7	1.25354	0.978992
753	0001897-45-6	Training	2.25826	0	0	1.37878	5.99396	4	2	3.4317	3.38179
754	0001912-24-9	Prediction	0.667439	0.435965	0	1.6319	5.77765	1	10	1.10585	1.56804
755	0001934-21-0	Training	-0.03	0.65249	12.6331	2.04141	6.86797	0	10	0.583495	0.84323
756	0001940-42-7	Prediction	2.225	0.587989	0	1.98777	5.53339	2	1	1.67597	1.40745
757	0001945-53-5	Training	1.39954	0.418654	11.9466	1.1688	6.67834	0	2	1.98643	1.6777
758	0001987-50-4	Training	2.74833	0.620718	0	1.13028	5.60947	0	1	1.66321	2.01742
759	0002008-58-4	Training	2.51	0.592886	10.9172	1.92118	5.63835	2	2	1.08813	1.25252
760	0002012-00-2	Prediction	1.10018	0	12.9482	1.7517	6.34388	0	3	1.76202	2.08522
761	0002027-17-0	Prediction	3.25163	0	0	0.99901	5.88332	0	0	2.78741	3.0194
762	0002032-59-9	Training	0.724444	0.574223	10.9676	1.53311	5.8999	0	8	0.44767	0.726116
763	0002042-14-0	Prediction	1.34243	0.688194	10.2684	1.72227	5.60947	0	2	0.615218	1.04531
764	0002043-47-2	Prediction	1.57	0.799826	0	1.74238	6.22851	0	1	1.6353	1.81914
765	0002049-95-8	Training	3.18	0	0	0.975119	5.60947	0	0	2.57926	2.78858
766	0002050-67-1	Training	2.63	0	0	1.32218	5.9162	2	0	3.12245	3.54083
767	0002050-68-2	Training	2.79125	0	0	1.32218	5.90536	2	0	3.11372	3.53201
768	0002050-74-0	Training	3.79	0	0	1.35164	5.86647	2	0	3.06734	3.43989
769	0002050-75-1	Training	4.04	0	0	1.35164	5.83773	2	0	3.04422	3.41549
770	0002050-76-2	Prediction	1.34429	0.501868	0	1.57798	5.97889	2	1	2.34653	2.38447
771	0002051-24-3	Training	3.99661	0	0	0.99403	6.6107	10	0	5.74516	4.52067
772	0002051-62-9	Training	1.69833	0	0	1.20721	5.80212	1	0	2.85249	2.96574
773	0002057-49-0	Training	1.83	0	0	1.17668	5.81413	0	2	2.44248	2.23637
774	0002058-94-8	Training	3.02444	0.938042	9.83008	1.3495	7.18614	0	2	1.8021	2.3268
775	0002078-54-8	Prediction	1.545	0.437083	0	1.14522	5.826	0	1	2.04799	1.7631
776	0002082-79-3	Prediction	1	0.231458	12.3357	1.10946	6.77422	0	4	2.09661	2.57104
777	0002104-64-5	Prediction	2.41609	0	10.6848	1.85483	6.34388	0	3	1.83393	2.01312
778	0002104-96-3	Prediction	3.00362	0	0	2.30351	6.06146	2	3	2.4396	2.10068
779	0002122-19-2	Training	1	0.366024	0	1.64022	5.04343	0	5	0.852659	1.07779
780	0002136-99-4	Training	4.9225	0	0	1.32218	6.47235	8	0	4.99191	4.48906
781	0002144-53-8	Training	1.08	0	10.8299	1.79063	6.78784	0	3	2.21606	2.27387
782	0002162-99-4	Prediction	2.725	0	0	1.2389	4.81218	0	0	1.80266	1.95273
783	0002173-57-1	Training	2.83085	0	0	1.17023	5.95842	0	2	2.5619	2.36078
784	0002198-77-8	Prediction	4.04	0	0	1.35164	5.826	2	0	3.03478	3.40936
785	0002212-67-1	Training	1.54187	0	11.5715	1.47811	5.50939	0	6	1.00886	0.938535
786	0002216-69-5	Training	2.32344	0	0	1.21975	5.80212	0	2	2.41077	2.2203
787	0002219-82-1	Prediction	1.915	0.477083	0	1.16258	5.81413	0	1	1.98203	1.77763
788	0002234-13-1	Training	2.77793	0	0	0.991076	6.44095	8	0	5.1361	4.56851
789	0002243-62-1	Training	1.60255	0.498125	0	1.34859	5.86079	0	2	1.80021	1.26547
790	0002255-17-6	Training	0.889507	0	11.7731	1.85596	6.10256	0	4	1.48003	1.68939
791	0002310-17-0	Training	2.38	0	12.0851	2.06929	6.40192	1	9	1.33574	1.46686
792	0002371-42-8	Prediction	1.47667	0.246667	0	1.10962	6.25575	0	1	2.63828	2.60134
793	0002381-21-7	Training	2.73	0	0	0.978449	6.45362	0	0	3.25688	3.40071
794	0002385-85-5	Prediction	3.30742	0	0	0.99403	7.46451	0	0	4.06239	3.90343
795	0002387-23-7	Training	0.095	0.29299	11.7573	1.31831	5.92693	0	5	1.16747	1.06909
796	0002403-88-5	Prediction	0.26	0.422778	0	1.26556	5.80814	0	3	1.7907	1.57843
797	0002409-55-4	Training	2.29333	0.511806	0	1.16258	5.80212	0	1	1.93111	1.72652
798	0002425-85-6	Prediction	0.445	0.564342	12.0597	1.6393	6.52356	0	4	1.24342	1.13537
799	0002436-93-3	Prediction	1.2925	0	0	1.21454	5.84932	0	2	2.45142	2.34866
800	0002437-79-8	Prediction	4.0775	0	0	1.43537	6.12905	4	0	3.70977	4.09613
801	0002440-02-0	Training	4.05	0	0	1.49582	6.4599	0	0	2.99714	3.05608
802	0002440-22-4	Prediction	2.5	0.547339	0	1.56041	6.27476	0	4	1.76814	1.45067
803	0002446-69-7	Prediction	2.32	0.627662	0	1.14522	5.54908	0	1	1.59871	2.07386
804	0002460-49-3	Prediction	2.008	0.612632	0	1.78386	5.62402	2	3	1.62567	1.64158
805	0002463-84-5	Training	2.09609	0	10.6189	2.23356	6.09807	1	4	1.58374	1.91381
806	0002465-27-2	Training	0.905988	0.424032	0	1.29705	6.29342	0	7	1.76696	2.02439
807	0002498-66-0	Training	2.41187	0	12.7153	1.23096	6.57508	0	2	2.32658	2.44155
808	0002528-38-3	Training	2.48	0	12.5594	1.3304	5.87774	0	3	1.62394	1.63414
809	0002531-84-2	Prediction	3.48	0	0	0.991076	6.1717	0	0	3.02354	3.22119
810	0002539-17-5	Training	2.51294	0.507601	0	1.87267	5.92693	4	3	2.42273	2.31434
811	0002539-26-6	Prediction	1.78	0.531644	0	1.86083	5.99396	3	5	2.01886	2.41411
812	0002580-78-1	Training	0.595	0.651705	13.3871	1.91495	7.15227	0	9	0.935556	0.943408
813	0002581-34-2	Training	2.54113	0.678399	10.257	1.72227	5.60947	0	2	0.627487	0.848427
814	0002611-82-7	Training	0.245	0.520032	12.6061	1.94704	7.08924	0	6	1.36537	0.980082
815	0002631-40-5	Prediction	1.28772	0.562476	11.0227	1.45601	5.79606	0	5	0.711969	0.978568
816	0002636-26-2	Prediction	0.771155	0	0	1.98372	5.8999	0	4	1.90013	2.10467
817	0002642-71-9	Training	2.27	0	12.4144	2.00596	6.35784	0	7	1.27588	1.41184
818	0002655-14-3	Prediction	0.599788	0.576365	10.8705	1.49563	5.71373	0	5	0.617326	0.944694
819	0002668-24-8	Prediction	2.18315	0.548589	0	1.85123	5.78383	3	3	2.03287	2.29474
820	0002668-47-5	Training	3.93608	0.272941	0	1.11523	6.48768	0	1	2.79084	2.78925
821	0002691-41-0	Prediction	-0.0866667	0	10.6566	1.95021	6.24028	0	8	1.20748	1.59722
822	0002695-37-6	Training	0.105	0.628021	10.7104	1.68418	5.72031	0	1	0.870213	0.355073
823	0002719-61-1	Prediction	2.41	0	0	0.954434	5.83773	0	0	2.77354	3.02275
824	0002795-39-3	Training	3.28	0.814249	10.1017	1.63217	7.02019	0	1	1.75517	2.90916
825	0002814-20-2	Prediction	0.355057	0	10.8644	1.5479	5.59471	0	5	1.17991	1.39126
826	0002855-13-2	Training	0.005	0.344028	0	1.16609	5.88332	0	2	2.09484	2.03131
827	0002885-00-9	Prediction	0.785	0.179934	0	1.01745	5.58725	0	1	2.22677	1.86176
828	0002921-88-2	Training	2.78245	0	0	2.23409	6.1506	3	5	2.58553	2.30121
829	0003010-80-8	Training	3.95	0.113514	0	1.45961	6.56667	3	1	3.57852	3.22143
830	0003048-65-5	Prediction	2.49	0	0	0.985228	5.50939	0	0	2.49355	2.75112
831	0003074-71-3	Training	3.32	0	0	0.893571	4.96284	0	0	2.10064	2.28428
832	0003089-11-0	Prediction	0.24	0	0	1.67798	6.44731	0	27	0.216399	0.310005
833	0003194-55-6	Prediction	3.78	0	0	1.45915	6.04263	0	0	2.68012	2.80202
834	0003194-57-8	Prediction	3.655	0	0	1.45915	5.63835	0	0	2.35478	2.48093
835	0003209-22-1	Prediction	1.98628	0	10.4239	2.07416	5.62402	2	1	1.82904	2.11639
836	0003214-47-9	Training	0.2	0.476847	12.8786	1.94084	7.55119	0	13	1.08244	1.24431
837	0003229-00-3	Training	2.22456	0	0	1.52219	5.1985	0	0	1.96855	1.95442
838	0003268-87-9	Training	2.693	0	0	1.32218	6.67582	8	4	4.75901	2.48945
839	0003279-07-0	Training	1.76	0.621831	10.5465	1.56674	5.95842	0	2	1.03916	1.10502
840	0003296-90-0	Training	0.312231	0.567685	0	1.67798	5.1985	0	2	1.01601	0.595156
841	0003319-31-1	Training	0.25	0	13.2231	1.24089	6.77878	0	9	1.76332	1.39804
842	0003380-34-5	Prediction	2.39023	0.533535	0	1.69222	6.14204	3	3	2.4204	2.52853
843	0003389-71-7	Training	2.78539	0	0	1.42947	6.36819	0	0	2.95729	3.03022
844	0003407-42-9	Training	2.76	0.350056	0	1.07839	6.42811	0	1	2.67012	2.68256
845	0003452-97-9	Prediction	0.855	0.607387	0	1.07463	5.273	0	1	1.43676	1.96893
846	0003481-20-7	Prediction	2.775	0.433133	0	1.78845	5.70711	4	1	2.57574	2.83947
847	0003520-72-7	Prediction	0.56	0.458841	12.9749	1.70453	7.2349	2	12	1.53808	1.18452
848	0003531-19-9	Prediction	1.04	0.598513	10.4699	2.15522	5.92693	1	3	0.88237	0.950071
849	0003576-88-3	Prediction	-1	0.670339	0	1.54302	6.1334	0	18	0.128879	0.420318
850	0003586-14-9	Training	3.27	0	0	1.19562	5.83773	0	2	2.45177	2.25458
851	0003618-60-8	Training	0.649903	0.564983	12.4521	1.97801	6.71538	1	6	1.24072	0.966434
852	0003622-84-2	Prediction	0.54	0.331296	11.744	1.62272	5.78383	0	2	1.14922	1.0327
853	0003648-21-3	Prediction	1.36429	0	12.277	1.25554	6.286	0	6	1.70887	1.78136
854	0003674-75-7	Training	2.15489	0	0	0.996792	6.23637	0	0	3.07266	3.2428
855	0003761-41-9	Training	0.432588	0	11.6169	1.81804	6.10256	0	5	1.40888	1.60542
856	0003761-42-0	Prediction	1.26954	0	11.6439	1.84948	6.22456	0	5	1.48949	1.85577
857	0003766-81-2	Training	1.27364	0.554663	11.111	1.42167	5.86079	0	5	0.786049	0.81566
858	0003772-94-9	Training	2.325	0	12.2826	1.57017	6.38182	5	3	3.10706	2.18387
859	0003792-59-4	Prediction	4.16	0	0	1.85019	6.31897	2	2	2.978	2.6483
860	0003811-49-2	Prediction	1.75023	0	0	1.8556	5.95324	0	3	2.10779	2.22508
861	0003846-71-7	Training	3.65218	0.303615	0	1.3843	6.6958	0	4	2.48667	2.77061
862	0003848-51-9	Training	1.86	0.405228	13.2893	1.59788	6.42162	0	3	1.40306	0.907226
863	0003864-99-1	Prediction	3.23345	0.290964	0	1.50792	6.7417	1	4	2.71236	2.94304
864	0003871-99-6	Training	2.016	0.82037	10.0056	1.7362	6.7511	0	1	1.4834	2.42943
865	0003891-29-0	Training	1.455	0.361502	11.3805	1.18506	6.0845	0	6	1.20267	0.915121
866	0003965-55-7	Prediction	-0.02	0.592334	11.3214	1.73271	6.18415	0	7	0.632409	0.975724
867	0004051-66-5	Prediction	2.30833	0.305342	11.9416	1.08563	6.43455	0	5	1.67023	1.53443
868	0004101-68-2	Prediction	1.58261	0	0	1.19819	5.04343	0	0	2.00958	2.18808
869	0004130-42-1	Training	3.5643	0.308897	0	1.09577	6.24804	0	1	2.56523	2.64722
870	0004162-45-2	Training	2.0475	0.594355	0	1.6578	6.66568	0	6	1.7787	1.28459
871	0004175-54-6	Prediction	3.12	0	0	0.985228	5.86079	0	0	2.77633	3.01433
872	0004286-23-1	Prediction	1.28	0.665536	0	1.2345	5.42495	0	1	1.40813	1.91871
873	0004292-75-5	Training	3.29	0	0	0.918296	5.39816	0	0	2.4383	2.66148
875	0004531-49-1	Prediction	0.49	0.484586	12.8927	1.7572	7.19669	2	16	1.05767	0.678161
876	0004620-70-6	Training	0.295	0.684306	0	1.30125	4.93447	0	3	0.758639	0.565822
877	0004637-24-5	Training	-0.12	0	0	1.45349	4.89035	0	7	1.0616	0.699884
878	0004821-19-6	Training	3.33093	0.285156	0	1.10807	6.30445	0	1	2.63253	2.68649
879	0004883-72-1	Training	0.947554	0.718958	9.83002	1.61719	5.36129	0	1	0.55604	0.520125
880	0004901-51-3	Prediction	1.46076	0.547601	0	1.73815	5.70711	4	1	2.46549	2.72725
881	0004904-61-4	Training	3.61586	0	0	0.970951	5.26269	0	0	2.30233	2.49332
882	0004979-32-2	Training	2.45333	0	0	1.39181	6.52649	0	7	2.40983	2.29914
883	0005102-83-0	Training	0.49	0.469781	12.9047	1.6673	7.21744	2	12	1.53396	0.932451
884	0005103-71-9	Training	3.3863	0	0	1.55459	6.77194	0	0	3.21816	3.24962
885	0005124-25-4	Training	1.55001	0.430679	12.64	1.78641	6.608	0	5	1.26376	0.920374
886	0005332-73-0	Prediction	0.02	0.494306	0	1.37842	4.07754	0	3	0.255281	0.232701
887	0005409-83-6	Training	3.66	0	0	1.50997	6.22059	2	2	3.07296	2.92851
888	0005428-54-6	Training	1.28598	0.653472	10.1589	1.72227	5.59471	0	2	0.650628	0.823607
889	0005468-75-7	Prediction	0.32	0.476166	12.8096	1.69937	7.16007	2	12	1.46903	1.07673
890	0005510-99-6	Training	2.82045	0.381528	0	1.11728	5.94803	0	1	2.2265	1.92829
891	0005566-34-7	Prediction	2.21815	0	0	1.55459	6.78106	0	0	3.2255	3.2708
892	0005567-15-7	Training	0.49	0.475218	13.1755	1.84921	7.34148	4	20	1.19998	-0.125407
894	0005707-44-8	Training	2.98	0	0	1	5.86647	0	0	2.77334	2.97136
895	0005786-21-0	Training	2.915	0.312455	0	1.49305	6.59715	1	10	1.98314	2.21696
896	0005809-23-4	Prediction	0.195	0.639745	12.5757	1.49305	6.46925	0	7	0.859071	1.0986
897	0005835-26-7	Training	1.63963	0.414492	11.9487	1.1688	6.71052	0	2	2.01716	1.70623
898	0005902-51-2	Prediction	0.78	0	11.8209	1.79471	6.05678	0	7	1.17442	1.4047
899	0005915-41-3	Training	0.8225	0.425761	0	1.59487	5.92693	1	10	1.25705	1.64472
900	0006034-54-4	Training	0.105	0.623864	10.7827	1.89185	5.87212	0	4	0.589558	0.649392
901	0006099-57-6	Training	0.71	0.568074	11.1802	1.68794	6.15486	0	2	1.16416	1.03553
902	0006130-75-2	Prediction	2.78837	0	0	1.749	5.62402	3	2	2.70753	2.7545
903	0006165-51-1	Prediction	2.9325	0	0	0.997503	6.07535	0	0	2.94271	3.15287
904	0006337-43-5	Training	1.28	0	12.0457	1.44452	6.5582	0	12	1.24897	0.977611
905	0006358-37-8	Prediction	0.49	0.458401	12.7561	1.69937	7.1507	2	12	1.48554	1.14958
906	0006358-85-6	Training	0.576667	0.490714	12.6452	1.73327	7.09257	2	12	1.38914	0.822019
907	0006362-80-7	Prediction	3.58	0	0	0.998001	6.18415	0	0	3.03001	3.22406
908	0006425-39-4	Prediction	0.48	0	0	1.45966	5.90536	0	12	1.37944	0.991132
909	0006459-94-5	Prediction	1.84612	0.475266	12.8476	1.7979	7.45761	0	9	1.48053	1.31013
910	0006639-30-1	Prediction	3.50526	0	0	1.50582	5.53339	3	0	2.95738	3.53924
911	0006674-22-2	Prediction	0.08	0	0	1.2538	5.63121	0	5	1.95832	1.84782
913	0006731-36-8	Training	4.00702	0	0	1.22753	6.42811	0	4	2.71221	2.56609
914	0006842-15-5	Training	3.40622	0	0	0.970951	5.04343	0	0	2.12588	2.29106
915	0006864-37-5	Training	1.28	0.288075	0	1.1331	6.1334	0	2	2.37944	2.44322
916	0006936-40-9	Prediction	3.69	0	0	1.77178	5.78996	4	2	3.0664	3.27225
917	0007012-37-5	Training	4.43	0	0	1.39462	6.02345	3	0	3.40866	4.01089
918	0007085-19-0	Training	0.48	0.71961	10.565	1.60274	5.826	1	4	0.835641	0.816283
919	0007267-11-0	Prediction	1.09781	0.637833	11.2461	1.72957	6.34036	2	4	1.48127	1.38877
920	0007287-19-6	Prediction	1.93	0.361583	0	1.54244	5.93225	0	12	0.929112	1.65151
921	0007299-99-2	Prediction	0.92	0	13.2141	1.23879	6.88857	0	12	1.55576	1.19204
922	0007379-51-3	Training	1.16	0.589782	0	1.41274	5.63835	0	3	1.38032	1.03114
923	0007529-22-8	Training	1	0	10.9803	1.5288	5.24175	0	5	0.899264	0.842728
924	0007580-85-0	Training	-0.22	0.715556	0	1.24067	4.93447	0	3	0.752516	0.593585
925	0007745-89-3	Prediction	1.88	0.505818	0	1.51973	5.35186	1	1	1.63008	1.42833
926	0007756-94-7	Prediction	3.40643	0	0	0.918296	5.66643	0	0	2.65418	2.92769
927	0008001-35-2	Prediction	4.05923	0	0	1.57662	6.73934	0	0	3.18065	3.2311
928	0010075-50-0	Prediction	2.98	0.435242	0	1.53064	5.65249	0	2	1.61413	1.29993
929	0010081-67-1	Training	1.925	0.26962	0	1.1028	6.85961	0	2	3.00129	2.912
930	0010113-28-7	Training	2.76	0	11.5769	1.66606	5.72685	0	3	1.38485	1.45914
931	0010161-33-8	Training	1.11	0.284695	11.6045	1.22169	6.632	0	2	2.10007	2.25641
932	0010315-98-7	Training	1.36534	0	0	1.29241	5.32301	0	5	1.69054	1.42228
933	0010319-14-9	Training	0.992988	0.39664	12.6543	1.61916	6.70808	0	5	1.46955	1.08641
934	0010453-86-8	Training	3.55	0	12.4019	1.25921	6.64769	0	5	2.09033	2.14579
935	0010461-98-0	Training	2.5	0	0	1.17668	5.93754	0	1	2.64095	2.4297
936	0010496-18-1	Training	2	0	0	1.07944	5.75257	0	2	2.44271	2.19082
937	0010541-83-0	Prediction	1.14241	0.756532	10.3801	1.59546	5.51745	0	4	0.320395	0.869069
938	0010605-21-7	Training	0.664545	0.645278	10.8647	1.74906	5.93754	0	9	0.189518	0.653658
939	0011096-82-5	Prediction	4.51833	0	0	1.39462	6.39859	7	0	4.6585	4.50681
940	0012002-48-1	Prediction	2.94659	0	0	1.5	5.37064	3	0	2.82939	3.42429
941	0012122-67-7	Training	2.21	0.314502	0	1.83659	5.01728	0	8	0.494845	1.11822
942	0012217-77-5	Training	2.31855	0.494794	13.1754	1.64773	6.8638	0	7	1.2366	0.945816
943	0012674-11-2	Training	4.02741	0	0	1.39462	6.01859	3	0	3.40476	4.00811
944	0013029-08-8	Prediction	2.212	0	0	1.32218	5.94803	2	0	3.14806	3.55876
945	0013049-38-2	Training	3.76	0	0	0.997503	6.02828	0	0	2.90484	3.0948
946	0013071-79-9	Training	2.14167	0	0	1.62762	5.78383	0	5	1.88981	1.92655
947	0013116-53-5	Prediction	1.77	0	0	1.57262	4.84419	0	0	1.65761	1.7244
948	0013150-81-7	Prediction	3.18	0	0	0.899744	5.24175	0	0	2.32192	2.60633
949	0013194-48-4	Training	0.896	0	12.4215	1.60279	5.50126	0	3	1.18916	1.13513
950	0013286-32-3	Training	1.03667	0	12.3602	1.6415	5.88332	0	3	1.48019	1.57144
951	0013358-11-7	Prediction	2.78305	0	13.3883	1.24635	6.80793	0	5	2.17153	2.22114
952	0013464-24-9	Training	1.59	0.583355	0	1.2345	6.32257	0	2	2.12895	1.71297
953	0013475-82-6	Training	3.1269	0	0	0.899744	5.63121	0	0	2.63534	2.8748
954	0013540-50-6	Prediction	3.23702	0	0	0.999249	5.95324	0	0	2.84356	3.06828
955	0013560-89-9	Training	1.57	0	0	1.55666	7.33237	0	0	3.6681	3.61541
957	0013674-84-5	Training	0.519273	0	12.6324	1.8052	5.92693	0	3	1.4165	1.50898
958	0013674-87-8	Training	1.22036	0	13.1636	1.96807	6.08904	0	3	1.43434	1.53091
959	0013936-21-5	Training	2.96527	0	12.5835	1.24004	6.47235	0	2	2.24652	2.35605
960	0013987-01-4	Prediction	3.32	0	0	0.893571	4.96284	0	0	2.10064	2.36923
961	0014233-37-5	Training	3.85	0.265963	13.0738	1.42473	6.65544	0	6	1.55968	1.8715
962	0014802-03-0	Prediction	0.905	0.310056	12.2973	1.26718	5.98896	0	1	1.59018	0.408001
963	0014816-18-3	Prediction	2.95158	0	0	1.89988	6.08904	0	4	2.09525	2.29626
964	0015046-75-0	Training	-0.17	0.615046	10.7574	1.70022	5.68017	0	1	0.842527	0.255089
965	0015087-24-8	Training	2.44857	0	12.6404	1.14463	6.52062	0	1	2.43023	1.87714
966	0015258-73-8	Prediction	1.21915	0.610108	0	1.67742	5.4848	2	1	1.76943	2.0553
967	0015307-86-5	Prediction	1.92273	0.661367	10.8956	1.72833	6.22851	2	4	1.38324	1.31527
968	0015782-05-5	Training	0.3	0.63073	11.8396	1.92648	6.78784	1	6	1.28104	1.00962
969	0015862-07-4	Training	3.99077	0	0	1.39462	6.03787	3	0	3.42027	4.01909
970	0015883-57-5	Training	1.17806	0.576643	11.1646	1.83375	6.42162	0	3	1.19573	0.921272
971	0015968-05-5	Training	4.0575	0	0	1.43537	6.16331	4	0	3.73735	4.16144
972	0015972-60-8	Training	1.39014	0	12.1255	1.51789	6.11589	0	6	1.44605	1.47438
974	0016219-75-3	Prediction	2.75513	0	0	0.985228	5.62402	0	0	2.5858	2.83982
976	0016400-50-3	Prediction	1.27667	0	0	1.43537	6.11147	0	0	2.74768	2.87054
977	0016517-11-6	Training	2.67667	0.932917	9.9479	1.22551	7.71646	0	2	2.29192	2.72355
978	0016605-91-7	Training	3.92231	0	0	1.32218	5.9428	2	0	3.14385	3.56231
979	0016606-02-3	Training	3.98727	0	0	1.39462	6.02345	3	0	3.40866	4.01089
980	0016611-67-9	Prediction	1.89	0	12.2637	1.49722	6.07535	2	1	2.38617	2.96762
981	0016766-29-3	Prediction	3.5	0	0	1.80161	5.86079	3	4	2.67282	2.76604
982	0016766-31-7	Training	1.74	0.589576	0	1.78386	5.63121	2	3	1.65885	1.45113
983	0017095-24-8	Training	0.64	0.656432	12.6259	2.06654	7.47364	0	14	0.657095	0.8383
984	0017109-49-8	Training	2.03392	0	13.2425	1.67845	6.17587	0	3	1.64809	1.76188
985	0017270-01-8	Prediction	0.93	0	13.8611	1.524	7.19369	0	6	2.21465	2.33906
986	0017302-11-3	Training	3.32	0	0	0.898059	5.09375	0	0	2.20369	2.4049
987	0017348-59-3	Prediction	0.76	0	0	1.09948	5.05625	0	2	1.87209	1.67261
988	0017700-09-3	Training	2.16035	0	10.5485	2.07416	5.76519	3	1	2.17277	2.20887
989	0017790-61-3	Training	3.04	0	0	1.17333	6.05209	1	0	3.07099	3.21719
990	0017804-35-2	Training	1.43	0.621574	12.305	1.66703	6.34036	0	13	0.107837	0.653437
991	0018181-70-9	Training	2.60361	0	0	2.30351	6.06146	2	3	2.4396	1.99481
992	0018259-05-7	Training	4.85	0	0	1.44858	6.2519	5	0	4.03886	4.45803
993	0018375-66-1	Training	2.94	0.609618	11.7839	1.31356	6.3613	0	8	0.84432	0.891524
994	0018708-70-8	Prediction	2.52546	0	10.6251	2.07416	5.77144	3	1	2.17358	2.31289
995	0018854-01-8	Training	2.21808	0	0	1.83366	6.27476	0	5	2.17943	2.34975
996	0019408-74-3	Prediction	3.92	0	0	1.61719	6.54103	6	4	4.02558	3.49773
997	0019666-30-9	Training	2.34393	0	12.1792	1.76151	6.51471	2	8	1.915	1.95943
998	0019715-19-6	Training	0.985	0.604357	11.2201	1.28528	6.31173	0	3	1.35202	1.11324
999	0019780-74-6	Prediction	3.43	0	0	0.918296	5.10595	0	0	2.20314	2.47445
1000	0019956-76-4	Training	2.65	0.432625	0	1.22169	6.4599	0	2	2.42511	1.98283
1001	0020020-02-4	Training	2.96851	0	0	1.43552	6.09357	4	0	3.68114	4.12915
1002	0020076-86-2	Prediction	1.00359	0.647395	12.0334	1.61718	6.286	0	6	0.768022	1.04865
1003	0020298-69-5	Prediction	2.28	0	10.9623	1.19417	5.90536	0	3	1.80388	1.86015
1004	0020367-35-5	Training	2.925	0	0	1.21081	5.77144	0	4	2.19233	1.99259
1005	0020651-71-2	Training	0.88	0.723982	10.5263	1.29723	5.64545	0	2	0.804978	1.30087
1006	0020668-33-1	Training	1.1275	0	0	1.21454	5.83773	0	2	2.44209	2.25206
1007	0020749-68-2	Training	1.51	0	13.4381	1.71005	6.91672	4	6	2.86778	2.36819
1008	0021087-64-9	Training	1.76	0.579144	11.7647	1.76082	5.99396	0	7	0.456227	0.714188
1009	0021267-72-1	Training	0.95	0.561432	11.784	1.56825	5.88332	0	4	0.783209	0.766988
1010	0021348-16-3	Training	0.662228	0.737037	10.1435	1.90564	4.93447	0	2	-0.072975	0.405135
1011	0021564-17-0	Training	1.90403	0	0	1.78223	5.88332	0	9	1.4941	1.51448
1012	0021609-90-5	Training	3.26	0	0	2.06272	6.35784	2	2	2.90051	2.44084
1013	0021850-44-2	Prediction	1.80667	0	0	1.65915	6.78559	0	4	2.77899	2.89215
1014	0022094-93-5	Training	0.49	0.415896	13.0375	1.75234	7.28276	4	12	2.07368	1.26157
1015	0022259-30-9	Training	0	0.587969	10.9786	1.61833	5.85507	0	10	0.152718	0.628834
1016	0022311-25-7	Training	3.18	0	0	1.45915	5.54908	0	0	2.28293	2.32541
1017	0022907-72-8	Training	3.5	0	0	0.918296	5.65249	0	0	2.64296	2.875
1018	0023135-22-0	Prediction	0.3	0.621542	11.4116	1.89315	5.61677	0	11	-0.342608	0.698531
1019	0023184-66-9	Training	1.55632	0	12.3993	1.43335	6.21661	0	6	1.55528	1.5429
1020	0024019-05-4	Training	2.26843	0.473522	12.6009	2.04627	6.81014	4	8	1.89515	1.37172
1021	0024423-11-8	Training	3.63	0	0	1.17528	6.1717	1	0	3.16625	3.30631
1022	0024800-44-0	Training	0.23	0.650232	0	1.31809	5.40717	0	6	0.873411	0.58393
1023	0025013-16-5	Training	1.29	0.519175	0	1.26992	5.86647	0	3	1.72087	1.29469
1024	0025154-52-3	Training	1.51113	0.518218	0	1.10587	5.73979	0	1	1.90236	1.8002
1025	0025154-54-5	Training	1.35293	0	10.2273	1.90564	5.69373	0	2	1.40909	1.13325
1026	0025155-23-1	Prediction	2.655	0	13.846	1.40698	6.74406	0	3	2.21103	2.41456
1027	0025155-30-0	Training	1.13071	0.555542	11.0916	1.33467	6.14633	0	1	1.45704	1.13035
1028	0025167-81-1	Training	1.99951	0.629576	0	1.73815	5.35186	2	1	1.60824	1.7851
1029	0025265-76-3	Training	0.49	0.540694	0	1.40564	5.15329	0	2	1.15109	0.778906
1030	0025291-17-2	Prediction	2.58	0	0	1.38244	6.62141	0	0	3.18513	3.26004
1031	0025311-71-1	Prediction	1.86784	0.187192	12.2188	1.68351	6.32257	0	6	1.30006	2.21882
1032	0025321-09-9	Training	3.31156	0	0	0.970951	5.65249	0	0	2.61602	2.82751
1033	0025323-68-6	Training	4.02341	0	0	1.39462	6.04737	3	0	3.42792	4.02446
1034	0025339-17-7	Training	2.51	0.640232	0	1.06479	5.03044	0	1	1.20757	1.79467
1035	0025376-45-8	Training	1.41	0.526806	0	1.35999	5.35186	0	2	1.35075	0.939968
1036	0025394-13-2	Prediction	0.653333	0.540069	11.5573	1.92909	6.57786	0	4	1.19532	1.07469
1037	0025429-29-2	Prediction	4.41644	0	0	1.44858	6.23245	5	0	4.02321	4.38117
1038	0025485-88-5	Training	2.88	0.573019	11.7515	1.34811	6.00881	0	4	0.984894	0.894082
1039	0025637-99-4	Prediction	3.46333	0	0	1.45915	6.04263	0	0	2.68012	2.80202
1040	0025638-17-9	Training	-0.356	0.464263	11.7345	1.49753	6.27852	0	1	1.5531	0.67153
1041	0025640-71-5	Training	2.08333	0.240717	0	1.10429	6.84268	0	1	3.1204	2.89034
1042	0025640-78-2	Training	3.84	0	0	0.999249	5.99396	0	0	2.87633	3.0681
1043	0025747-06-2	Training	0.58	0.564983	12.4521	1.97801	6.71538	1	6	1.24072	0.966434
1044	0025791-96-2	Training	0.595	0.577201	0	1.31957	6.82763	0	23	0.416762	0.830299
1045	0025954-13-6	Prediction	0	0.69824	10.4959	1.92541	5.22036	0	3	0.0744848	0.633385
1046	0025973-55-1	Training	3.205	0.260212	0	1.34965	6.75809	0	4	2.6061	2.65943
1047	0026076-28-8	Training	1.67667	0	11.9365	1.67643	7.15383	0	6	2.21059	2.55012
1048	0026087-47-8	Prediction	1.80269	0	12.781	1.56491	6.05678	0	3	1.63579	1.86315
1049	0026140-60-3	Training	1.99048	0	0	0.988699	6.20051	0	0	3.04794	3.22459
1050	0026234-46-8	Training	1.08	0	12.4589	1.44745	6.53814	0	5	1.90269	2.03259
1051	0026259-45-0	Training	1.2	0.455252	0	1.54244	5.8999	0	12	0.791792	1.04896
1052	0026306-61-6	Training	2.586	0.515704	0	1.77288	6.14633	3	3	2.40375	2.48997
1053	0026389-78-6	Training	1.62	0	11.2385	1.98638	6.2672	0	5	1.47606	1.77034
1054	0026399-36-0	Prediction	1.59	0	11.2748	1.95161	6.58617	0	5	1.74855	2.22884
1055	0026444-49-5	Prediction	2.56806	0	13.3304	1.49908	6.48768	0	3	1.98598	2.24008
1056	0026530-20-1	Training	2.51583	0	11.2329	1.44547	5.63121	0	4	1.34057	1.37343
1057	0026545-58-4	Prediction	0.39254	0.398234	12.2974	1.63078	6.90073	0	2	1.93389	1.6816
1058	0026601-64-9	Training	3.93375	0	0	1.43537	6.33328	6	0	4.34809	4.67919
1059	0026603-23-6	Training	0.846667	0.184468	0	1.05971	6.45047	0	2	2.79526	2.25609
1060	0026630-87-5	Prediction	2.274	0.429055	13.0613	1.80141	6.99118	1	18	0.49104	1.14865
1061	0026761-40-0	Prediction	1.08	0	12.4746	1.19964	6.49375	0	6	1.89378	1.93502
1062	0026780-96-1	Training	2.94333	0.241181	0	1.17797	6.00881	0	2	2.31194	2.20014
1063	0026787-65-5	Training	1.65058	0.665277	11.2989	1.09427	6.23637	0	4	1.21325	1.04359
1064	0026898-17-9	Prediction	4.02097	0	0	0.999571	6.33683	0	0	3.15208	3.31931
1065	0026914-33-0	Prediction	3.98717	0	0	1.43537	6.14633	4	0	3.72368	4.1035
1066	0026967-76-0	Prediction	2.13286	0	14.3027	1.36318	6.83195	0	3	2.27902	2.41956
1067	0027193-29-9	Training	3.58	0	0	0.935269	5.9108	0	0	2.84215	3.06109
1068	0027193-86-8	Training	2.87	0.561348	0	1.07868	5.87212	0	1	1.97151	2.08798
1070	0027344-41-8	Training	0.46	0.48807	11.6914	1.54379	6.96885	0	2	1.95988	1.62708
1071	0027458-92-0	Training	2.73	0.623189	0	1.04204	5.3033	0	1	1.45905	2.00523
1072	0027676-62-6	Training	0.27	0.131681	14.6818	1.3437	7.58223	0	15	1.52548	1.3789
1073	0028076-73-5	Training	4.14	0	0	1.63098	6.14204	4	2	3.42179	3.50488
1074	0028106-30-1	Training	2.70324	0	0	0.99403	5.39816	0	0	2.39954	2.59243
1075	0028249-77-6	Training	2.17334	0	11.8742	1.65564	5.87212	1	6	1.43021	1.49668
1076	0028299-29-8	Training	0.04	0.68367	10.9118	1.21129	6.08904	0	4	1.03427	0.979418
1077	0028299-41-4	Prediction	2.52	0	0	1.18191	5.96358	0	2	2.56006	2.44301
1078	0028519-02-0	Prediction	0.835	0.47712	12.0862	1.51886	6.75577	0	4	1.5941	1.3092
1079	0028575-17-9	Training	3.42449	0	0	0.997503	6.01859	0	0	2.89704	3.08771
1080	0028680-44-6	Training	3.81	0	0	1.42947	6.31173	0	0	2.91186	2.98703
1081	0028680-45-7	Prediction	3.58307	0	0	1.49582	6.49072	0	0	3.02194	3.10685
1082	0028984-87-4	Prediction	3.14	0	0	1.12167	6.55251	0	2	3.06483	2.87356
1083	0029082-74-4	Prediction	3.28563	0	0	1	6.1591	5	0	4.19376	4.51318
1084	0029091-05-2	Prediction	2.025	0.671871	11.1418	2.07459	6.49375	0	6	0.721141	0.963081
1085	0029253-36-9	Training	2.86459	0	0	0.99901	5.9108	0	0	2.80952	3.00603
1086	0029446-15-9	Training	2.88	0	0	1.61719	6.24028	2	4	2.8356	2.65632
1087	0029598-76-3	Training	1.385	0	13.3641	1.25416	7.21891	0	20	1.01216	0.417254
1088	0029761-21-5	Training	2.46872	0	13.2189	1.38061	6.43455	0	3	2.00999	2.12147
1089	0030171-80-3	Prediction	0.61	0	0	1.65002	5.92693	0	4	2.09267	2.22594
1090	0030560-19-1	Training	-1.3475	0.448971	11.4251	2.02322	5.33272	0	4	0.26066	0.247741
1091	0030746-58-8	Prediction	3.17	0	0	1.68582	6.41836	4	4	3.41777	3.63194
1092	0031508-00-6	Training	4.585	0	0	1.44858	6.20859	5	0	4.00401	4.44675
1093	0031604-28-1	Training	4.4	0	0	1.43552	6.07993	4	0	3.67017	4.12273
1094	0031775-20-9	Prediction	0.49	0.468384	12.8653	1.72433	7.21156	2	16	1.10722	0.756586
1095	0032388-55-9	Training	2.9	0	11.9732	1.10265	6.61874	0	1	2.56743	2.23321
1096	0032588-76-4	Training	0.26	0	13.2867	1.9183	7.08924	0	10	1.56379	1.56412
1097	0032598-10-0	Training	4.635	0	0	1.43537	6.1203	4	0	3.70273	4.14171
1098	0032598-11-1	Prediction	4.462	0	0	1.43537	6.1203	4	0	3.70273	4.09237
1099	0032598-13-3	Training	2.93208	0	0	1.43537	6.11147	4	0	3.69562	4.13761
1100	0032598-14-4	Training	4.565	0	0	1.44858	6.21661	5	0	4.01046	4.44887
1101	0032669-06-0	Training	2.55437	0	0	1.33729	6.02345	0	2	2.52872	2.38992
1102	0032690-93-0	Prediction	4.6	0	0	1.43537	6.1203	4	0	3.70273	4.09237
1103	0032774-16-6	Prediction	5.22	0	0	1.43537	6.28972	6	0	4.31304	4.57639
1104	0032861-85-1	Training	3.0185	0	10.8377	1.87057	6.3081	2	5	2.0643	2.20659
1105	0033025-41-1	Training	4.58	0	0	1.43537	6.12905	4	0	3.70977	4.14576
1106	0033027-68-8	Training	1.71	0	0	2.42622	6.35784	0	1	2.33966	2.19439
1107	0033089-61-1	Training	3.26	0	0	1.28058	6.33328	0	7	2.31127	2.05572
1108	0033245-39-5	Prediction	1.51	0	11.1879	2.15228	6.46303	0	5	1.55153	2.02706
1109	0033284-50-3	Prediction	3.55	0	0	1.32218	5.93225	2	0	3.13536	3.54698
1110	0033284-52-5	Training	3.01692	0	0	1.43537	6.11147	4	0	3.69562	4.13761
1111	0033284-53-6	Prediction	4.39	0	0	1.43537	6.14633	4	0	3.72368	4.1035
1113	0033423-92-6	Training	3.166	0	0	1.68582	6.39859	4	4	3.40186	3.6353
1114	0033576-92-0	Training	1.89	0	0	1.80127	5.72685	0	3	1.95341	1.9427
1115	0033629-47-9	Training	2.15	0.348832	11.2885	1.62335	6.37843	0	4	1.43332	1.35972
1116	0033704-61-9	Training	2.02	0	12.0668	1.11728	6.35437	0	1	2.34204	1.87864
1117	0033857-26-0	Prediction	2.37	0	0	1.61719	6.23245	2	4	2.8293	2.70738
1118	0033979-03-2	Training	3.03571	0	0	1.43537	6.31897	6	0	4.33658	4.67406
1119	0034335-10-9	Prediction	1.42	0.624182	10.6508	1.73945	5.50939	0	0	0.779195	0.434318
1120	0034364-42-6	Training	3.45	0	13.9939	1.40344	6.85751	0	3	2.29599	2.42101
1121	0034643-46-4	Prediction	2.55789	0	0	1.93357	6.09357	2	3	2.65478	2.35372
1122	0034883-39-1	Training	4.0696	0	0	1.32218	5.93225	2	0	3.13536	3.55381
1123	0034883-41-5	Training	3.34918	0	0	1.32218	5.92158	2	0	3.12677	3.54519
1124	0034883-43-7	Training	3.69	0	0	1.32218	5.92693	2	0	3.13108	3.54951
1125	0035065-27-1	Training	4.34188	0	0	1.43537	6.29711	6	0	4.31899	4.66615
1126	0035065-28-2	Training	5.435	0	0	1.43537	6.30445	6	0	4.32489	4.66882
1127	0035065-29-3	Training	3.53333	0	0	1.39462	6.38182	7	0	4.645	4.58169
1128	0035367-38-5	Prediction	1.89778	0.67288	11.6957	1.97915	6.32615	1	6	0.840387	0.996847
1129	0035554-44-0	Training	1.805	0	0	1.6927	6.18826	2	7	2.45762	2.11834
1130	0035693-92-6	Prediction	3.93	0	0	1.39462	6.05209	3	0	3.43171	3.98607
1131	0035693-99-3	Training	3.32483	0	0	1.43537	6.12905	4	0	3.70977	4.14576
1132	0035694-06-5	Prediction	3.995	0	0	1.43537	6.3081	6	0	4.32783	4.58261
1133	0035694-08-7	Training	5.052	0	0	1.32218	6.4599	8	0	4.9819	4.48424
1134	0035822-46-9	Training	3.5225	0	0	1.51984	6.6107	7	4	4.36845	3.0219
1135	0035860-37-8	Prediction	3.52855	0	0	0.982474	6.35089	0	0	3.17214	3.34035
1136	0036065-30-2	Prediction	4.33912	0	0	1.70953	6.03787	0	2	2.34982	2.37509
1137	0036335-67-8	Training	2.05555	0.177942	11.1599	1.81269	6.29711	0	4	1.48111	2.5035
1138	0036355-01-8	Training	3.48549	0	0	1.43537	6.31897	0	0	2.91466	2.98858
1139	0036437-37-3	Training	4.075	0.315837	0	1.3843	6.65028	0	4	2.43552	2.77035
1140	0036483-60-0	Prediction	3.145	0	0	1.63098	6.31897	0	2	2.61622	2.62627
1141	0036559-22-5	Training	4.535	0	0	1.43537	6.13773	4	0	3.71675	4.14975
1142	0036653-82-4	Prediction	3.04	0.612193	0	1.02588	5.45959	0	1	1.60615	2.21563
1143	0036734-19-7	Prediction	2.01923	0.437678	12.3588	1.91919	6.43775	2	11	0.944975	0.984457
1144	0037372-50-2	Training	1.3527	0.519921	12.6837	1.82259	7.45761	0	12	1.12638	1.01867
1145	0037680-65-2	Training	3.2992	0	0	1.39462	6.04263	3	0	3.4241	4.02178
1146	0037680-66-3	Training	4.37	0	0	1.39462	6.04263	3	0	3.4241	4.02178
1147	0037680-73-2	Prediction	3.80692	0	0	1.44858	6.21661	5	0	4.01046	4.37733
1148	0037853-59-1	Training	1.29313	0	0	1.74647	6.40192	0	4	2.42555	2.52632
1149	0038379-99-6	Training	4.78	0	0	1.44858	6.23245	5	0	4.02321	4.45301
1150	0038380-01-7	Training	4.86	0	0	1.44858	6.21661	5	0	4.01046	4.44887
1151	0038380-02-8	Training	4.86833	0	0	1.44858	6.22456	5	0	4.01686	4.45095
1152	0038380-03-9	Training	5.035	0	0	1.44858	6.22456	5	0	4.01686	4.45095
1153	0038380-04-0	Training	5.08	0	0	1.43537	6.31173	6	0	4.33076	4.67146
1154	0038380-05-1	Prediction	4.88	0	0	1.43537	6.31897	6	0	4.33658	4.58625
1155	0038380-07-3	Training	4.84667	0	0	1.43537	6.31173	6	0	4.33076	4.67146
1156	0038380-08-4	Training	5.88	0	0	1.43537	6.30079	6	0	4.32195	4.66749
1157	0038411-22-2	Prediction	4.7625	0	0	1.43537	6.32615	6	0	4.34236	4.58864
1158	0038411-25-5	Prediction	5.705	0	0	1.39462	6.39526	7	0	4.65582	4.50557
1159	0038444-77-8	Training	5.08	0	0	1.39462	6.04263	3	0	3.4241	4.02178
1160	0038444-85-8	Training	4.47	0	0	1.39462	6.03309	3	0	3.41642	4.01637
1161	0038444-86-9	Prediction	4.36	0	0	1.39462	6.03309	3	0	3.41642	3.9761
1162	0038444-90-5	Prediction	4.58	0	0	1.39462	6.01372	3	0	3.40083	3.96585
1163	0038444-93-8	Training	3.16855	0	0	1.43537	6.14633	4	0	3.72368	4.1537
1164	0038638-05-0	Prediction	2.84	0	13.8522	1.37691	6.69332	0	3	2.18524	2.36646
1165	0038640-62-9	Training	3.41188	0	0	0.991076	6.16752	0	0	3.02017	3.19971
1166	0038964-22-6	Prediction	2.82	0	0	1.61719	6.23245	2	4	2.8293	2.70738
1167	0039001-02-0	Training	3.092	0	0	1.20091	6.6733	8	2	5.01736	2.89794
1168	0039227-28-6	Prediction	3.4425	0	0	1.61719	6.54103	6	4	4.02558	3.49773
1169	0039227-58-2	Training	2.75167	0	0	1.66925	6.33683	3	4	3.12364	3.29026
1170	0039227-61-7	Prediction	3.1075	0	0	1.66925	6.47851	5	4	3.71163	3.82883
1171	0039485-83-1	Training	3.4	0	0	1.44858	6.22851	5	0	4.02004	4.45198
1172	0039569-21-6	Training	3.98	0	0	1.74647	5.85507	1	0	2.61912	2.42433
1173	0039801-14-4	Prediction	4.55	0	0	1.21975	7.39572	0	0	3.89152	3.76624
1174	0040036-79-1	Prediction	2.876	0.690029	0	1.25279	6.28972	0	15	0.677305	0.958168
1175	0040186-71-8	Training	5.29	0	0	1.32218	6.47235	8	0	4.99191	4.48906
1176	0040186-72-9	Prediction	5.07	0	0	1.20721	6.53814	9	0	5.34068	4.3903
1177	0040321-76-4	Training	4.38	0	0	1.66925	6.46614	5	4	3.70168	3.84957
1178	0040690-89-9	Prediction	0.962138	0	12.113	1.64586	6.71538	0	10	1.46703	1.56021
1179	0040766-31-2	Training	3.44	0	0	0.997503	6.0845	0	0	2.95008	3.13558
1180	0041122-70-7	Training	3.5874	0	0	1.13928	6.16752	0	1	2.84516	2.62421
1181	0041198-08-7	Prediction	1.96	0	12.7851	1.9713	6.09357	1	3	1.69416	2.03912
1182	0041464-39-5	Training	4.2425	0	0	1.43537	6.13773	4	0	3.71675	4.14975
1183	0041464-40-8	Training	4.33	0	0	1.43537	6.12905	4	0	3.70977	4.14576
1184	0041464-42-0	Prediction	4.85	0	0	1.43537	6.1203	4	0	3.70273	4.09237
1185	0041464-51-1	Training	4.6975	0	0	1.44858	6.22456	5	0	4.01686	4.45095
1186	0041611-76-1	Training	0.54	0.247165	13.8787	1.32914	7.08757	0	6	1.93436	2.24075
1187	0042240-73-3	Training	3.23125	0.439713	0	1.70884	6.32257	4	2	3.00478	3.11801
1188	0042615-29-2	Training	2.31067	0.543003	11.1559	1.33467	6.20051	0	1	1.51199	1.17763
1189	0046382-54-1	Prediction	1.72	0.56077	11.1682	1.27337	6.4599	0	2	1.63116	1.69187
1190	0047377-16-2	Training	0.52	0.550272	11.1208	1.30337	6.21261	0	1	1.53104	1.26154
1191	0049562-28-9	Training	1.72538	0	12.4821	1.46536	6.52942	1	6	2.02306	2.06131
1192	0050375-10-5	Training	2.52519	0	0	1.749	5.64545	3	2	2.72478	2.72177
1193	0050512-35-1	Training	2.03654	0	12.0508	1.6122	6.09357	0	10	0.987286	0.870268
1194	0050853-70-8	Prediction	0.95	0.62987	10.9613	1.46048	6.1717	0	4	1.03445	1.12695
1195	0050876-32-9	Training	3.65	0	0	0.918296	5.60212	0	0	2.60243	2.83393
1196	0050925-42-3	Training	0.5	0.546973	12.3785	1.95956	7.66809	0	21	0.317879	0.725332
1197	0051207-31-9	Prediction	3.56484	0	0	1.58186	6.37502	4	2	3.63442	3.62332
1198	0051630-58-1	Training	2.78727	0	12.9943	1.48969	6.70319	1	6	2.12222	2.13905
1199	0051892-26-3	Prediction	3.97	0	0	1.52271	5.95324	2	2	2.8513	2.71483
1200	0051908-16-8	Training	5.31	0	0	1.43537	6.30079	6	0	4.32195	4.66749
1201	0052184-14-2	Training	3.685	0.339174	11.1257	1.51469	6.66058	0	4	1.73644	1.82212
1202	0052186-00-2	Training	0.025	0	12.989	1.81015	6.54391	0	8	1.39502	1.4066
1203	0052207-48-4	Prediction	-0.123333	0.561737	10.7983	1.98815	5.88888	0	5	0.527555	0.793583
1204	0052303-69-2	Training	0.0802022	0	12.0847	1.65032	6.18826	0	10	1.04211	0.941246
1205	0052322-80-2	Training	3.24365	0	0	1.592	6.05678	3	2	3.13614	3.28877
1206	0052591-27-2	Training	1.72	0	10.4027	1.8397	6.37843	0	3	1.88501	1.85298
1207	0052663-58-8	Training	5.19	0	0	1.43537	6.13773	4	0	3.71675	4.14975
1208	0052663-60-2	Prediction	5.15	0	0	1.44858	6.24028	5	0	4.02951	4.38305
1209	0052663-61-3	Training	5.27	0	0	1.44858	6.22059	5	0	4.01367	4.44991
1210	0052663-63-5	Training	5.15	0	0	1.43537	6.31536	6	0	4.33367	4.67276
1211	0052663-69-1	Prediction	5.3125	0	0	1.39462	6.38856	7	0	4.65043	4.50307
1212	0052663-70-4	Training	5.26	0	0	1.39462	6.39526	7	0	4.65582	4.5871
1213	0052663-78-2	Training	5.35667	0	0	1.32218	6.47235	8	0	4.99191	4.48906
1214	0052712-04-6	Training	5.3225	0	0	1.43537	6.3081	6	0	4.32783	4.67014
1215	0052712-05-7	Prediction	5.27667	0	0	1.39462	6.39859	7	0	4.6585	4.50681
1216	0052744-13-5	Training	5.54	0	0	1.43537	6.31536	6	0	4.33367	4.67276
1217	0052789-62-5	Prediction	1.39143	0.560366	11.4699	1.98212	6.52356	0	4	1.10519	1.02661
1218	0052918-63-5	Training	2.59403	0	12.7358	1.60623	6.7511	0	6	1.87839	2.02814
1219	0053469-21-9	Prediction	4.3025	0	0	1.43537	6.13773	4	0	3.71675	4.09984
1220	0053555-64-9	Training	4.53	0	0	1.43552	6.06611	4	0	3.65904	4.11617
1221	0053826-12-3	Training	1.08	0.881667	9.82052	1.66734	6.69084	0	2	1.30835	1.63329
1222	0054135-80-7	Prediction	3.2997	0	0	1.749	5.63835	3	2	2.71907	2.76829
1223	0054135-81-8	Prediction	3.07703	0.594168	0	1.749	5.63121	3	1	2.10654	2.66613
1224	0054135-82-9	Training	3.09	0	0	1.749	5.62402	3	2	2.70753	2.69958
1225	0054352-93-1	Training	3.81	0	0	0.935269	5.88332	0	0	2.82004	3.0404
1226	0054910-89-3	Prediction	2.07308	0.336941	0	1.58942	6.34739	0	4	2.06172	2.59994
1227	0055250-84-5	Training	3.47	0.284761	13.2962	1.36484	7.25488	0	10	1.6415	2.11683
1228	0055335-06-3	Training	-0.91	0.779485	10.3147	2.10541	5.83188	3	6	0.801406	0.199252
1229	0055720-37-1	Training	4.43	0	0	1.41527	5.95324	3	0	3.3416	3.94939
1230	0056113-42-9	Prediction	1.05714	0.62659	11.3975	2.0632	6.17587	4	4	1.65713	1.41687
1231	0056348-72-2	Training	4.16629	0	0	1.63098	6.1334	4	2	3.41483	3.49974
1232	0056558-16-8	Training	4.81	0	0	1.44858	6.24417	5	0	4.03264	4.45604
1233	0056558-17-9	Prediction	4.81	0	0	1.44858	6.22059	5	0	4.01367	4.3783
1234	0056773-42-3	Training	2.93	0.814249	10.1017	1.63217	7.02019	0	1	1.75517	2.90916
1235	0056803-37-3	Training	3.09571	0	13.6574	1.44087	6.65544	0	3	2.13276	2.27338
1236	0057018-04-9	Training	2.4934	0	0	2.03867	6.07074	2	3	2.58262	2.16828
1237	0057055-39-7	Prediction	2.03802	0	12.7964	1.39086	6.76734	0	3	2.29584	2.56482
1238	0057057-83-7	Training	2.005	0.571644	0	1.85123	5.78996	3	3	2.01041	2.2128
1239	0057117-31-4	Training	4.08	0	0	1.5645	6.45677	5	2	3.94607	4.01113
1240	0057117-39-2	Training	2.72	0	0	1.58186	6.38519	4	2	3.6426	3.64157
1241	0057117-41-6	Training	3.58	0	0	1.5645	6.4599	5	2	3.94859	4.01252
1242	0057117-43-8	Training	3.57	0	0	1.5645	6.46614	5	2	3.95361	4.01527
1243	0057117-44-9	Prediction	3.94	0	0	1.50997	6.53524	6	2	4.27412	3.84453
1244	0057160-47-1	Training	1.825	0.571893	11.981	1.82282	6.24028	2	6	1.19254	0.94907
1245	0057465-28-8	Training	4.24556	0	0	1.44858	6.20456	5	0	4.00076	4.44569
1246	0057567-84-7	Training	0.647143	0.652925	10.7514	1.42777	5.81413	0	4	0.747611	0.836949
1247	0057653-85-7	Prediction	3.22	0	0	1.61719	6.54103	6	4	4.02558	3.49773
1248	0058011-68-0	Training	0.765	0	13.2283	1.89783	6.78784	2	6	2.20556	2.35147
1249	0058567-11-6	Prediction	2.74	0	0	1.1331	5.70711	0	4	2.18034	2.02512
1250	0059039-21-3	Training	3.79	0	0	1.592	6.04263	3	2	3.12476	3.27726
1251	0059080-33-0	Training	3.57323	0	0	1.39462	6.05209	0	0	2.72075	2.80672
1252	0059080-37-4	Training	4.31823	0	0	1.43537	6.12905	0	0	2.76183	2.83886
1253	0059365-60-5	Training	0.810801	0.646577	0	1.59546	5.54908	1	2	1.48362	1.11781
1254	0059722-76-8	Prediction	2.00366	0.528299	12.8847	1.63061	6.78333	0	6	1.25596	1.13736
1255	0059756-60-4	Training	0.706071	0	12.7884	1.59613	6.6053	0	4	1.96165	2.19059
1256	0060123-64-0	Training	4.21	0	0	1.64361	6.22851	5	2	3.7219	3.91937
1257	0060123-65-1	Training	4.08	0	0	1.64361	6.22456	5	2	3.71871	3.91731
1258	0060145-21-3	Training	4.58	0	0	1.44858	6.22851	5	0	4.02004	4.45198
1259	0060207-90-1	Training	1.27556	0	0	1.77655	6.52062	2	9	2.48384	2.03142
1260	0060628-17-3	Training	1.945	0	0	1.29286	6.38182	0	3	2.74069	2.6217
1261	0060851-34-5	Training	3.98	0	0	1.50997	6.53233	6	2	4.27178	3.87276
1262	0061328-45-8	Training	4.11	0	0	1.63098	6.13773	4	2	3.41832	3.50232
1263	0061328-46-9	Prediction	4.24	0	0	1.63098	6.13773	4	2	3.41832	3.49921
1264	0061391-87-5	Training	3.23512	0	12.2302	1.76697	6.14633	0	6	1.3373	1.42964
1265	0061788-32-7	Training	4.17	0	0	0.992774	6.20051	0	0	3.04586	3.22131
1266	0061788-76-9	Training	1.845	0	0	1.38303	6.35784	0	0	2.97273	3.05353
1267	0061790-13-4	Training	0.875	0.702324	10.3071	1.23096	5.57215	0	2	0.817722	1.30049
1268	0061949-76-6	Prediction	2.44464	0	12.5061	1.49243	6.66823	0	5	1.98176	2.2497
1269	0061968-28-3	Training	1.34378	0.48111	13.1142	1.60402	6.95559	0	11	0.955813	0.911215
1270	0061968-52-3	Training	0.951557	0.442764	12.169	1.80074	6.79682	1	15	0.665337	0.87328
1271	0062338-09-4	Prediction	3.34	0	0	0.90117	5.50126	0	0	2.53003	2.81587
1272	0062615-08-1	Training	3.11	0	0	1.58186	6.39859	4	2	3.65338	3.64875
1273	0062796-65-0	Training	3.41667	0	0	1.43537	6.1506	4	0	3.72712	4.15565
1274	0063428-00-2	Training	1.1	0.519401	11.7544	1.51886	6.73221	0	4	1.54319	1.13802
1275	0064700-56-7	Prediction	0.72	0	11.5695	1.83484	6.12905	3	9	1.73853	1.84637
1276	0065281-76-7	Training	1.5937	0.415012	12.0036	1.30745	6.7417	1	2	2.20463	2.1152
1277	0065310-45-4	Training	1.82472	0.415012	12.0036	1.30745	6.73459	1	2	2.19891	2.10956
1278	0066108-37-0	Training	2.56615	0	13.4451	2.07165	6.28972	0	3	1.52731	1.66352
1279	0066215-27-8	Training	0	0.637509	0	1.53948	5.81413	0	10	0.706066	0.299563
1280	0066246-88-6	Training	1.97	0	0	1.60609	6.15486	2	5	2.67338	2.47299
1281	0066332-96-5	Prediction	1.45837	0.524592	12.1632	1.68946	6.45677	0	5	1.10637	1.07107
1282	0066735-04-4	Training	1.26772	0.647823	10.7298	1.23266	6.01372	0	2	1.21365	1.43341
1283	0066841-25-6	Training	2.47	0	13.06	1.70506	6.86797	0	6	1.904	2.08218
1284	0067028-18-6	Training	3.23667	0	0	1.68582	6.39859	4	4	3.40186	3.6353
1285	0067306-00-7	Training	2.2	0	0	1.07849	6.2634	0	3	2.75511	2.52155
1286	0067375-30-8	Training	2.34422	0	12.7243	1.60623	6.7511	0	6	1.87903	2.03034
1287	0067562-39-4	Prediction	3.535	0	0	1.40798	6.6053	7	2	4.61968	3.45135
1288	0067564-91-4	Training	3.03	0	0	1.18311	6.40192	0	5	2.61471	2.40883
1289	0067905-19-5	Prediction	3.75	0.933796	9.92418	1.25225	7.59136	0	2	2.17782	2.68993
1290	0068085-85-8	Prediction	2.97	0	12.6794	1.75861	6.87005	0	6	1.89924	2.24685
1291	0068194-05-8	Training	4.18	0	0	1.44858	6.23245	5	0	4.02321	4.45301
1292	0068194-17-2	Prediction	5.37333	0	0	1.32218	6.46925	8	0	4.98942	4.41351
1293	0069806-40-2	Training	1.23	0	11.3041	1.96212	6.52649	1	9	1.53387	1.76075
1294	0070124-77-5	Training	3.43	0	13.0106	1.58854	6.78784	0	8	1.70355	1.65498
1295	0070288-86-7	Training	1.70667	0.320103	14.3661	1.34569	7.63772	0	24	0.47018	1.05361
1296	0070362-47-9	Prediction	5	0	0	1.43537	6.13773	4	0	3.71675	4.09984
1297	0070648-26-9	Training	3.9	0	0	1.50997	6.53524	6	2	4.27412	3.87455
1298	0071048-82-3	Prediction	2.14	0	11.9034	1.13028	5.95842	0	1	2.02575	1.49623
1300	0071767-67-4	Training	1.41946	0	10.9629	1.87157	6.56667	2	8	1.96749	2.11519
1301	0072416-87-6	Prediction	1.24	0	0	1.39462	6.01372	0	0	2.68987	2.82494
1302	0074051-80-2	Training	0.51	0	12.4941	1.45432	6.27099	0	6	1.58309	1.57956
1303	0074338-50-4	Training	3.04	0	0	1.2798	6.14633	2	0	3.32933	3.7957
1304	0074918-40-4	Prediction	3.01	0	0	1.50997	6.23245	2	2	3.0825	2.97691
1305	0075627-02-0	Training	2.96	0	0	1.50997	6.54391	6	2	4.28109	3.87988
1307	0076738-62-0	Training	1.54545	0.252102	0	1.57701	6.32615	1	6	2.19044	2.20657
1308	0077501-63-4	Training	2.48	0	12.4088	1.96442	6.76504	1	9	1.6638	1.80434
1309	0079060-60-9	Training	2.78	0	0	1.50997	6.54391	6	2	4.28109	3.87988
1310	0079277-27-3	Training	-0.1	0.65039	12.4698	2.08359	6.56667	0	18	-0.462366	0.297029
1311	0079538-32-2	Training	3.48	0	12.1435	1.83459	6.80793	0	3	2.13737	2.50197
1312	0079617-96-2	Training	2.62	0.21745	0	1.39935	6.42811	2	2	3.03821	3.06448
1313	0079755-43-4	Training	1.17	0.490112	0	1.72957	6.23637	0	3	1.81782	1.36036
1314	0079983-71-4	Prediction	1.61	0.178656	0	1.70824	6.32615	2	6	2.44752	2.11101
1315	0080793-17-5	Training	3.41	0	0	1.48062	6.62141	0	0	3.13488	3.18535
1316	0080844-07-1	Prediction	3.6	0	0	1.24562	6.608	0	6	2.6494	2.52808
1317	0081335-77-5	Prediction	0.2	0.615592	12.1003	1.60133	6.48768	0	9	0.675048	1.042
1318	0082097-50-5	Prediction	0.11	0.637324	12.6354	2.04655	6.55251	0	15	-0.150919	0.788987
1319	0082657-04-3	Prediction	2.645	0	12.5827	1.57626	6.84055	0	3	2.27163	2.63255
1320	0083055-99-6	Training	0.2	0.648941	12.4438	1.89943	6.62407	0	16	-0.120448	0.488063
1321	0083704-22-7	Training	3.41	0	0	1.58186	6.39192	4	2	3.64801	3.64518
1322	0084087-01-4	Training	-0.1	0.65839	11.1171	1.88048	6.11589	2	4	1.20608	1.00145
1323	0084852-15-3	Training	2.56884	0.608883	0	1.10587	5.76519	0	1	1.81508	2.13487
1324	0085954-11-6	Training	0.92	0	0	1.30969	6.71296	0	8	2.50274	2.21748
1325	0090268-23-8	Training	0.49	0.47692	12.7842	1.74742	7.13966	2	14	1.23019	0.680322
1326	0090268-24-9	Training	0.49	0.473942	13.1499	1.76902	7.28139	3	16	1.35524	0.277408
1327	0092296-04-3	Training	-0.2	0.439454	12.5156	1.72387	6.38182	0	8	0.812689	0.799514
1328	0092341-06-5	Prediction	3.2	0	0	1.50997	6.54103	6	2	4.27877	3.84784
1329	0095737-68-1	Training	3.14	0	0	1.4285	6.39192	0	8	2.18359	2.01366
1330	0095759-44-7	Training	1.93	0	0	1.12727	6.51175	0	0	3.22748	3.33107
1331	0095977-29-0	Prediction	0.94	0.716499	10.7138	2.00323	6.49375	1	8	0.766884	0.898129
1332	0096489-71-3	Training	3.19333	0	12.578	1.55742	6.57228	0	6	1.76816	1.87266
1333	0097038-96-5	Training	4.97	0	0	1.43537	6.16331	0	0	2.7894	2.86636
1334	0099387-89-0	Training	2.59	0	0	1.91328	6.43133	1	9	2.10502	1.9816
1335	0100468-92-6	Prediction	1.86333	0.340202	12.1512	2.10032	6.50279	4	4	2.19997	2.79334
1336	0104294-16-8	Training	3.95	0	0	1.64361	6.23637	5	2	3.72822	3.92346
1337	0107534-96-3	Training	1.795	0.140991	0	1.54574	6.38519	1	6	2.38597	1.65718
1338	0110553-27-0	Prediction	1.7	0.324022	0	1.19338	6.32972	0	5	2.16638	2.63044
1339	0111158-11-3	Prediction	2.83	0	0	1.13264	6.00881	0	0	2.82001	3.00688
1340	0113136-77-9	Training	-0.4	0.636892	11.9118	1.87975	6.28227	2	5	1.22295	0.961714
1341	0114012-04-3	Training	1.21341	0	0	2.17131	6.03309	1	4	2.14828	2.01689
1342	0114311-32-9	Training	-1	0.620376	12.1266	1.64856	6.51471	0	11	0.467174	0.789363
1343	0116020-44-1	Training	2.89	0	0	0.944087	6.06146	0	0	2.95887	3.16387
1344	0118134-30-8	Training	1.9	0	0	1.22551	6.4151	0	7	2.4053	2.09331
1345	0119168-77-3	Training	1.01	0.367736	12.4693	1.51517	6.50578	1	6	1.54233	1.26029
1346	0120928-09-8	Prediction	2.71	0	0	1.34639	6.49375	0	6	2.50589	2.4818
1347	0121552-61-2	Prediction	2.59	0.424722	0	1.35434	6.20859	0	6	1.76772	2.0507
1348	0123251-96-7	Prediction	0.0914286	0.508233	11.6381	2.2125	6.65801	2	4	1.62212	1.57157
1349	0124729-02-8	Training	2.07	0	0	1.29752	6.35089	0	2	2.81257	2.66167
1350	0126690-66-2	Prediction	3.29	0	0	0.918296	5.16479	0	0	2.25049	2.52514
1351	0131983-72-7	Training	0.78	0.121893	0	1.5666	6.56667	1	6	2.54403	1.72675
1352	0132182-92-4	Prediction	3.41	0	0	1.56363	6.65286	0	2	2.91939	2.8909
1353	0134605-64-4	Training	0.6	0	12.7218	1.96862	6.88244	1	14	1.24307	1.02402
1354	0134701-20-5	Training	0.78	0.362024	0	1.04346	6.27852	0	1	2.55341	2.45792
1355	0135861-56-2	Training	1.23	0.490346	0	1.36096	6.85541	0	10	1.81023	1.88913
1356	0145701-23-1	Training	0.18	0.617152	12.3683	2.24566	6.65801	0	11	0.267409	0.730054
1357	0154279-60-4	Training	0.93	0.0450237	0	1.08828	6.32972	0	4	2.65082	2.08065
1358	0155041-85-3	Training	2.08	0	0	0.977418	6.37502	0	0	3.19415	3.35088
1359	0155569-91-8	Prediction	1.79333	0.243457	14.3663	1.38108	7.65017	0	25	0.45398	0.940427
1360	0156573-09-0	Training	2.69	0	0	1.84522	5.70044	0	2	2.00883	1.92515
1361	0160535-46-6	Training	1.41	0.194724	13.27	1.33496	6.76964	0	9	1.47388	1.95488
1362	0174300-34-6	Training	0.292706	0	11.6569	1.69135	5.86647	0	6	1.18237	1.23739
1363	0174350-05-1	Training	1.87	0	0	1.33384	6.29342	0	2	2.74774	2.61124
1364	0180409-60-3	Training	2.72	0.674939	12.2823	1.79454	6.73459	0	5	1.09097	0.928821
1365	0181587-01-9	Training	0.98	0.517728	12.31	2.275	6.63988	2	7	1.22976	0.986667
1366	0183677-34-1	Training	1.78	0.420263	0	1.31639	5.67332	0	3	1.65918	1.30512
1367	0188023-86-1	Prediction	2.61844	0	12.4794	1.25797	6.66823	0	5	2.10323	2.24745
1368	0195209-93-9	Prediction	0.0517769	0	11.2942	1.57754	5.66643	0	6	1.09961	1.2839
1369	0208338-50-5	Prediction	1.28	0	0	1.43642	6.71296	0	2	3.03285	2.95312
1370	0216698-07-6	Training	1.56	0	13.2865	1.21924	7.0859	0	6	2.31554	2.21787
1371	0219750-66-0	Prediction	3.37	0	0	0.918296	5.65249	0	0	2.64296	2.91724
1372	0250736-57-3	Prediction	1.43	0	13.4006	1.78685	6.93634	0	13	1.20427	1.17054
1373	0303186-20-1	Training	1.81	0	0	1.57269	6.82546	0	2	3.05365	2.97377
1374	0371146-04-2	Training	1.77	0.372533	12.2703	1.46242	6.93828	0	12	1.09068	1.38835
1375	0701909-41-3	Training	1.87	0	10.7931	1.99309	6.43455	0	3	1.83016	1.94735
1376	0727678-39-9	Prediction	1.11	0.255427	14.867	1.5605	7.37212	0	19	0.691562	1.72965
1377	1072957-71-1	Training	2.475	0.437246	0	1.88397	6.82546	0	6	1.97819	2.61805
1378	1204225-72-8	Training	2.82	0	13.7617	1.44434	6.71296	0	3	2.17152	2.31436
1379	1424148-99-1	Prediction	1.71	0.703536	12.2055	1.43497	6.2519	0	7	0.658494	1.06138
1380	UNK-01	Prediction	0.756667	0.658773	0	1.3005	5.87212	0	4	1.44475	1.33535
1381	UNK-02	Training	3.76	0	0	1.6398	6.85541	0	4	2.84508	2.90172
1382	UNK-03	Prediction	3.19	0	0	1.60272	6.84907	0	4	2.85895	2.94002
1383	UNK-04	Training	2.96	0	0	1.49588	6.12905	0	2	2.53254	2.44151
1384	UNK-05	Prediction	2.85	0	0	1.60272	6.87005	0	4	2.87584	2.9542
1385	UNK-06	Training	3.92	0	0	1.47028	6.40192	0	2	2.76522	2.67144
1386	UNK-07	Training	0.085	0.618051	0	1.53291	5.73979	0	6	1.06937	0.705089
1387	UNK-08	Prediction	2.155	0.565911	11.0508	1.29992	6.32257	0	1	1.60657	1.65634
1388	UNK-11	Training	0.51	0.427269	11.4627	1.80307	5.76519	0	3	0.844229	0.59871
1389	UNK-12	Training	0.095	0.507528	12.9357	1.96047	7.67089	0	34	-0.953264	0.276689
1390	UNK-13	Training	0.09	0	14.4016	1.18528	6.54103	0	3	2.1305	2.01731
1391	UNK-14	Training	2.23	0.64366	0	1.56177	5.54908	1	4	1.30601	0.978101
1392	UNK-15	Prediction	0.095	0.513906	11.6137	1.35999	6.49979	0	4	1.45174	1.27591
1393	UNK-18	Training	3.71	0	0	1.47028	6.39192	0	2	2.75718	2.6635
1394	UNK-19	Training	3.2	0	13.46	1.44087	6.63988	0	3	2.13111	2.29018
1395	UNK-21	Training	1.29	0.396277	13.2209	1.94152	7.30988	0	16	0.667293	1.90307

## Sheet: Table S6
Table S6. List of chemicals outside the applicability domain of the OLS-MLR model, highlighted in Figure 2.
SMILES	Identifier	Structure
OCCN(c1nc(nc(n1)Nc1ccc(cc1)S(=O)(=O)O)Nc1ccc (c(c1)S(=O)(=O)O)C=Cc1ccc(cc1S(=O)(=O)O)Nc1nc (Nc2cccc(c2)S(=O)(=O)O)nc(n1)N(CCO)CCO)CCO	UNK-12
COCN(c1nc(nc(n1)N(COC)COC)N(COC)COC)COC	0003089-11-0
Clc1c(Cl)c(Cl)c(c2c1c(Cl)c(c(c2Cl)Cl)Cl)Cl	0002234-13-1
C=CC=O	0000107-02-8

## Sheet: Table S7
ID	CAS	Splitting	Exp_log_BCF	Pred_log_BCF_MLR	Pred_log_BCF_ANN	Res. Exp-Pred MLR	Res. Exp-Pred ANN	Res. > 1 MLR (Pred.)	Res. > 1 ANN (Pred.)	Res. > 1 MLR (Tr.)	Res. > 1 ANN (Tr.)	Common Res. >1 (Pred.)	Common Res. >1 (Tr.)
1	0000002-35-5	Prediction	2.33	2.13662	2.10883	0.19338	0.221166
3	0000012-51-0	Training	2.12	2.45924	1.89181	-0.339245	0.228194
4	0000013-24-1	Training	1.3	1.62311	1.17677	-0.323112	0.123232
5	0000017-62-4	Training	0.48	0.458946	0.899906	0.0210544	-0.419906
7	0000018-35-4	Training	2.98	2.69199	2.89995	0.288009	0.0800469
8	0000020-18-0	Prediction	1.41	3.27822	3.17695	-1.86822	-1.76695	**	**			**
9	0000047-09-5	Training	0.54	0.522697	0.721951	0.0173031	-0.181951
10	0000050-04-4	Prediction	1.3	1.98157	2.28215	-0.681568	-0.982154
11	0000050-06-6	Training	0.7	0.710743	0.828268	-0.0107433	-0.128268
12	0000050-28-2	Prediction	0.706667	2.49124	2.00323	-1.78457	-1.29656	**	**			**
13	0000050-29-3	Prediction	3.64813	3.36502	3.55857	0.283109	0.0895599
14	0000050-30-6	Prediction	0.491482	1.03631	1.51817	-0.544828	-1.02669		**
15	0000050-31-7	Prediction	0.588333	1.3931	1.84268	-0.804764	-1.25435		**
16	0000050-32-8	Prediction	2.5418	3.42534	3.53264	-0.883535	-0.990837
17	0000050-65-7	Training	2.4	1.35705	1.09355	1.04295	1.30645			*	*		*
18	0000051-28-5	Training	0.652339	0.558263	0.649857	0.0940757	0.0024819
19	0000051-44-5	Prediction	0.581429	0.973417	1.48686	-0.391989	-0.905432
20	0000051-52-5	Training	1.09	0.87293	0.911034	0.21707	0.178966
21	0000051-79-6	Training	0.36	-0.624421	0.168149	0.984421	0.191851
22	0000052-68-6	Training	-1.27643	0.664466	0.389358	-1.9409	-1.66579			*	*		*
23	0000053-70-3	Prediction	2.8	3.43897	3.53853	-0.638973	-0.738532
24	0000055-38-9	Training	2.2348	1.99975	2.12503	0.235053	0.109771
25	0000055-63-0	Training	0.97	1.30365	1.08706	-0.333651	-0.117055
26	0000056-23-5	Training	1.16041	1.73108	1.85041	-0.570668	-0.689994
27	0000056-38-2	Prediction	2.2344	1.4974	1.79176	0.736999	0.442637
28	0000056-49-5	Training	3.17	3.45146	3.5456	-0.281464	-0.375601
29	0000056-55-3	Training	2.8725	3.22971	3.38192	-0.35721	-0.509417
30	0000057-10-3	Training	2.85	0.878814	1.41043	1.97119	1.43957			*	*		*
31	0000057-15-8	Training	0.276902	1.31016	0.774843	-1.03326	-0.497941			*
32	0000057-41-0	Prediction	0.54	0.991849	1.08941	-0.451849	-0.549414
33	0000057-63-6	Prediction	2.29364	2.59717	2.08882	-0.303529	0.204816
34	0000057-97-6	Prediction	2.91	3.34815	3.46645	-0.43815	-0.556448
35	0000058-73-1	Training	1.25667	2.34616	2.20408	-1.08949	-0.947413			*
36	0000058-90-2	Training	2.062	2.49288	2.62755	-0.430878	-0.56555
37	0000059-50-7	Prediction	0.985949	1.44227	1.71699	-0.456325	-0.731037
38	0000060-00-4	Prediction	0.345	-0.326957	0.457112	0.671957	-0.112112
39	0000060-09-3	Prediction	1.565	1.63967	1.35815	-0.0746655	0.206848
40	0000060-29-7	Training	0.519091	0.799497	0.289344	-0.280406	0.229747
41	0000060-51-5	Prediction	0.768378	0.191097	0.572004	0.577281	0.196375
42	0000060-57-1	Prediction	3.48753	3.11829	3.09397	0.369237	0.39356
43	0000061-82-5	Training	0.0683333	0.331324	0.0721511	-0.262991	-0.00381773
44	0000062-44-2	Prediction	1.08	0.65562	0.902959	0.42438	0.177041
45	0000062-53-3	Prediction	0.431723	1.09485	1.18433	-0.663129	-0.752604
46	0000062-56-6	Prediction	-0.1	-0.409634	-0.255249	0.309634	0.155249
47	0000062-73-7	Training	-0.246206	0.917157	0.847326	-1.16336	-1.09353			*	*		*
48	0000063-25-2	Prediction	1.18675	0.82647	1.02724	0.36028	0.159513
49	0000065-85-0	Training	0.92	0.369459	1.06979	0.550541	-0.149787
50	0000066-81-9	Prediction	0.734286	1.01828	1.08179	-0.283999	-0.347503
51	0000067-66-3	Prediction	0.827444	0.768375	0.84567	0.0590685	-0.0182261
52	0000067-68-5	Training	0.183333	-0.0695982	-0.413038	0.252932	0.596371
53	0000067-72-1	Training	2.41019	2.39235	2.65204	0.0178456	-0.241849
54	0000068-12-2	Training	-0.1081	0.0790148	-0.145948	-0.187115	0.0378477
55	0000068-22-4	Training	1.42	2.002	1.74393	-0.582001	-0.323931
56	0000070-30-4	Prediction	2.16595	3.67629	3.09427	-1.51034	-0.928322	**
57	0000071-36-3	Training	-0.4	0.0237466	0.605795	-0.423747	-1.00579				*
58	0000071-43-2	Training	1.50832	1.73382	1.80594	-0.225505	-0.297621
59	0000071-55-6	Training	0.593232	1.3015	1.19713	-0.708266	-0.603895
60	0000072-43-5	Prediction	2.92294	2.50172	2.6099	0.42122	0.313038
61	0000072-54-8	Training	4.48	3.29198	3.54968	1.18802	0.930316			*
62	0000072-55-9	Training	3.14417	3.29813	3.57303	-0.153961	-0.428859
63	0000074-11-3	Training	1.06	0.630309	1.18405	0.429691	-0.124048
64	0000074-31-7	Training	3.12942	2.12124	2.41249	1.00817	0.716923			*
65	0000074-97-5	Training	0.458464	-0.355342	-0.120421	0.813805	0.578885
66	0000075-09-2	Prediction	1.15149	-0.15062	0.130154	1.30211	1.02133	**	**			**
67	0000075-25-2	Prediction	1.08289	0.768375	0.84567	0.31451	0.237215
68	0000075-35-4	Prediction	0.956485	0.658843	0.76062	0.297642	0.195864
69	0000075-64-9	Training	0.655	0.942198	0.520854	-0.287198	0.134146
70	0000075-65-0	Prediction	0.311667	0.675586	1.17937	-0.363919	-0.867704
71	0000075-69-4	Training	1.32	1.39891	1.33439	-0.0789082	-0.0143851
72	0000075-71-8	Training	0.862809	1.32164	1.2245	-0.458829	-0.361688
73	0000075-91-2	Prediction	0.58	0.459086	1.64065	0.120914	-1.06065		**
74	0000075-98-9	Prediction	0.173665	0.221453	1.11506	-0.0477886	-0.941394
75	0000076-01-7	Prediction	1.8125	1.87041	2.01215	-0.0579132	-0.199647
76	0000076-12-0	Training	1.71764	2.03986	2.04123	-0.322216	-0.323592
77	0000076-13-1	Training	1.63481	2.0085	1.99029	-0.373689	-0.355483
78	0000076-14-2	Training	1.49	2.03986	2.04123	-0.549858	-0.551235
79	0000076-44-8	Training	3.50358	3.1899	3.22788	0.313689	0.275708
80	0000076-83-5	Training	2.61405	3.12804	3.24299	-0.513992	-0.628943
81	0000076-93-7	Training	-0.124	1.21616	1.02305	-1.34016	-1.14705			*	*		*
82	0000077-47-4	Training	2.1807	2.78996	2.98936	-0.609262	-0.808661
83	0000077-73-6	Training	2.23872	2.83359	3.03043	-0.594869	-0.791709
84	0000077-99-6	Prediction	0.81	1.0456	0.992584	-0.235601	-0.182584
85	0000078-32-0	Prediction	3.16733	2.07771	2.32314	1.08963	0.844192	**
86	0000078-40-0	Training	-0.0280979	1.15993	1.11403	-1.18803	-1.14213			*	*		*
87	0000078-42-2	Training	1.08038	2.00962	1.997	-0.929238	-0.916618
88	0000078-48-8	Training	3.13727	1.40575	1.32689	1.73152	1.81038			*	*		*
89	0000078-51-3	Prediction	0.639813	1.17645	1.11662	-0.536636	-0.476808
90	0000078-59-1	Training	0.562378	1.76506	1.10964	-1.20268	-0.547263			*
91	0000078-63-7	Training	3.61	2.5435	2.38836	1.0665	1.22164			*	*		*
92	0000078-79-5	Training	1.14063	1.29708	1.24983	-0.156444	-0.109196
93	0000078-87-5	Training	0.614254	1.05441	0.943782	-0.440159	-0.329528
94	0000079-00-5	Training	0.575591	0.989973	0.870403	-0.414383	-0.294812
95	0000079-01-6	Training	1.07251	1.04224	0.929523	0.0302628	0.142984
96	0000079-06-1	Training	0.09	-0.598595	0.0526383	0.688595	0.0373617
97	0000079-19-6	Training	1.105	-0.129873	-0.330023	1.23487	1.43502			*	*		*
98	0000079-27-6	Training	0.749932	1.39037	1.30364	-0.640433	-0.553709
99	0000079-34-5	Training	0.993468	1.39037	1.30364	-0.396897	-0.310173
100	0000079-46-9	Prediction	0.601221	0.681015	0.106261	-0.0797938	0.49496
101	0000079-57-2	Prediction	-0.43	0.763407	1.07006	-1.19341	-1.50006	**	**			**
102	0000079-92-5	Prediction	2.96206	2.82886	3.06883	0.133209	-0.106761
103	0000079-94-7	Prediction	2.46984	2.2267	2.06814	0.243148	0.401701
104	0000080-05-7	Training	1.13953	2.00692	1.60235	-0.867392	-0.462821
105	0000080-07-9	Training	1.96	2.22196	2.38043	-0.261963	-0.420428
106	0000080-09-1	Training	-0.18	0.898321	0.846245	-1.07832	-1.02624			*	*		*
107	0000080-43-3	Training	2.79539	2.83148	2.65177	-0.0360855	0.143623
108	0000080-51-3	Training	-0.02	0.953704	0.78956	-0.973704	-0.80956
109	0000081-14-1	Prediction	3.09	2.01753	2.35288	1.07247	0.737124	**
110	0000081-15-2	Training	3.67299	1.97071	2.18931	1.70228	1.48368			*	*		*
111	0000081-16-3	Prediction	0.38	1.1241	1.10617	-0.744097	-0.726174
112	0000082-05-3	Training	1.88629	2.41695	1.90622	-0.530662	-0.0199351
113	0000082-44-0	Training	2.22325	2.29912	2.48785	-0.0758712	-0.2646
114	0000082-45-1	Training	2.06128	1.33431	0.993913	0.726973	1.06737				*
115	0000082-68-8	Training	2.08659	3.01294	2.65787	-0.926346	-0.571274
116	0000083-32-9	Training	2.80501	2.89882	3.0906	-0.0938115	-0.285591
117	0000083-42-1	Training	1.99	1.68187	1.95053	0.308135	0.0394716
118	0000083-79-4	Training	1.34667	1.61036	1.19185	-0.263695	0.154816
119	0000084-15-1	Prediction	3.20251	3.06729	3.25694	0.135219	-0.0544285
120	0000084-47-9	Training	2.48	2.29137	2.40906	0.188629	0.0709388
121	0000084-51-5	Training	1.90146	2.17677	2.28489	-0.275305	-0.383425
122	0000084-57-1	Prediction	1.05	1.28812	1.24319	-0.238122	-0.193189
123	0000084-65-1	Prediction	2	2.10233	2.27552	-0.10233	-0.275519
124	0000084-66-2	Prediction	2.07	1.37554	1.54823	0.694461	0.521772
125	0000084-74-2	Training	2.47869	1.52435	1.50643	0.95434	0.972268
126	0000084-75-3	Training	3.24	1.65183	1.60487	1.58817	1.63513			*	*		*
127	0000085-01-8	Training	3.32889	2.96276	3.15341	0.366126	0.175477
128	0000085-22-3	Training	2.17512	2.54223	2.58662	-0.367109	-0.411501
129	0000085-41-6	Prediction	1.135	0.649824	0.942215	0.485176	0.192785
130	0000085-68-7	Prediction	1.62739	1.68736	1.81388	-0.059976	-0.18649
131	0000085-83-6	Prediction	0.75	1.51273	1.25273	-0.762732	-0.502725
132	0000086-30-6	Training	1.67829	1.77503	1.63364	-0.0967355	0.0446465
133	0000086-50-0	Training	1.788	1.16552	1.30833	0.622477	0.479669
134	0000086-73-7	Training	2.80133	2.9328	3.1237	-0.131465	-0.322365
135	0000086-74-8	Training	2.28701	2.16899	1.94771	0.118024	0.339305
136	0000086-87-3	Training	0.167617	1.05124	1.38474	-0.883622	-1.21713				*
137	0000087-02-5	Training	0.145714	1.01332	0.816173	-0.867603	-0.670459
138	0000087-40-1	Training	2.85404	2.71907	2.71444	0.134977	0.139604
139	0000087-62-7	Training	0.45	1.59481	1.27968	-1.14481	-0.829677			*
140	0000087-65-0	Training	1.2981	1.66562	1.68811	-0.367519	-0.390011
141	0000087-68-3	Training	2.61911	2.34298	2.53852	0.276131	0.080595
142	0000087-82-1	Training	3.07978	2.76417	2.96259	0.315609	0.117196
143	0000087-83-2	Prediction	2.61975	2.50529	2.62177	0.114455	-0.00202369
144	0000087-84-3	Training	2.52542	2.35389	2.32437	0.171523	0.201048
145	0000088-06-2	Prediction	2.47889	2.05443	2.50629	0.424457	-0.0273981
146	0000088-18-6	Training	1.94	1.78954	1.69998	0.150464	0.240018
147	0000088-19-7	Prediction	0.160129	0.858101	0.242944	-0.697972	-0.0828154
148	0000088-26-6	Training	1.515	2.17122	1.65524	-0.656224	-0.140235
149	0000088-30-2	Training	1.1	0.67802	0.735423	0.42198	0.364577
150	0000088-44-8	Training	0.2	0.759066	0.738655	-0.559066	-0.538655
151	0000088-60-8	Training	1.965	1.94563	1.6925	0.0193716	0.2725
152	0000088-72-2	Training	1.32501	1.44663	0.83788	-0.121621	0.487132
153	0000088-73-3	Training	1.96281	1.51464	1.71247	0.448175	0.250344
154	0000088-74-4	Training	0.822256	0.559675	0.638701	0.262581	0.183555
155	0000088-75-5	Prediction	1.10726	0.448241	0.953267	0.659015	0.153989
156	0000088-85-7	Training	0.983485	1.07196	0.875404	-0.0884723	0.108081
157	0000088-89-1	Training	0.125556	0.691307	0.737216	-0.565751	-0.611661
158	0000088-98-2	Training	0.32	0.58186	0.771833	-0.26186	-0.451833
159	0000089-59-8	Training	1.92	1.67016	1.93673	0.24984	-0.0167251
160	0000089-61-2	Training	1.66778	1.81734	1.99842	-0.149556	-0.33064
161	0000089-63-4	Training	1.05235	0.800452	0.817679	0.251894	0.234667
162	0000089-69-0	Training	1.73805	2.16261	2.19892	-0.424568	-0.460871
163	0000089-72-5	Prediction	1.49	1.66952	1.7838	-0.179517	-0.293804
164	0000089-83-8	Training	1.48	1.73264	1.65496	-0.25264	-0.174958
165	0000089-93-0	Training	0.956657	1.53534	1.19953	-0.578688	-0.242873
166	0000090-12-0	Training	2.544	2.66182	2.86332	-0.117824	-0.319319
167	0000090-13-1	Training	2.63	2.7789	2.86644	-0.148896	-0.23644
168	0000090-30-2	Training	3.29177	2.33442	2.38188	0.957341	0.909887
169	0000090-41-5	Training	1.55145	1.9582	1.61387	-0.406751	-0.0624168
170	0000090-51-7	Training	0.207762	1.012	0.816717	-0.804237	-0.608955
171	0000090-94-8	Training	1.55698	1.5494	1.46319	0.00757955	0.0937906
172	0000091-15-6	Training	0.385367	2.0043	1.82149	-1.61893	-1.43612			*	*		*
173	0000091-20-3	Prediction	2.05883	2.54107	2.79519	-0.482236	-0.736361
174	0000091-22-5	Prediction	0.69994	2.20854	2.11406	-1.5086	-1.41412	**	**			**
175	0000091-23-6	Training	0.76626	1.28926	1.18777	-0.523002	-0.421511
176	0000091-53-2	Prediction	1.84	2.19699	2.29214	-0.356993	-0.45214
177	0000091-57-6	Training	3.19057	2.64594	2.8475	0.544631	0.343077
178	0000091-58-7	Training	3.63	2.76301	2.84962	0.866987	0.780383
179	0000091-63-4	Training	0.48	2.32676	2.13417	-1.84676	-1.65417			*	*		*
180	0000091-64-5	Prediction	1.31	1.56312	1.64904	-0.253123	-0.339036
181	0000091-66-7	Training	2.0152	2.06885	1.82211	-0.0536523	0.193087
182	0000091-94-1	Prediction	2.35582	2.36931	2.25025	-0.0134956	0.105565
183	0000091-96-3	Prediction	-0.175	1.15101	1.14271	-1.32601	-1.31771	**	**			**
184	0000092-06-8	Prediction	1.32899	3.0512	3.24416	-1.7222	-1.91516	**	**			**
185	0000092-24-0	Prediction	2.41	3.2191	3.37963	-0.809104	-0.969634
186	0000092-52-4	Prediction	2.61	2.63196	2.88019	-0.021955	-0.270193
187	0000092-69-3	Training	1.65911	1.75757	2.03462	-0.0984592	-0.375509
188	0000092-70-6	Training	0.366667	0.925877	0.937799	-0.55921	-0.571132
189	0000092-77-3	Training	0.720073	1.29743	0.969479	-0.57736	-0.249407
190	0000092-83-1	Prediction	3.62	2.63887	2.52414	0.981127	1.09586		**
191	0000092-84-2	Training	2.65049	1.92483	2.3251	0.725662	0.32539
192	0000092-86-4	Training	3.55512	2.63975	2.74234	0.915369	0.812777
193	0000092-87-5	Training	1.84167	1.83637	1.32412	0.0052999	0.517545
194	0000092-88-6	Prediction	1.525	1.68203	1.52937	-0.157032	-0.00437185
195	0000093-46-9	Training	3.28	2.5993	2.89078	0.680704	0.389218
196	0000093-76-5	Training	0.998182	1.13354	0.583213	-0.135354	0.414969
197	0000094-52-0	Prediction	0.298614	0.598594	0.852478	-0.29998	-0.553863
198	0000094-74-6	Prediction	0.406667	0.654532	0.876739	-0.247866	-0.470072
199	0000094-75-7	Training	1.18	0.807845	0.555041	0.372155	0.624959
200	0000095-14-7	Training	0.83	1.1628	0.859414	-0.332799	-0.0294137
201	0000095-16-9	Training	0.746148	1.79535	1.75064	-1.04921	-1.00449			*	*		*
202	0000095-47-6	Prediction	1.18	2.20399	2.45375	-1.02399	-1.27375	**	**			**
203	0000095-48-7	Training	1.03	1.17751	1.50441	-0.147508	-0.474405
204	0000095-49-8	Training	1.89148	2.28968	2.27794	-0.398203	-0.38646
205	0000095-50-1	Training	2.48292	2.43841	2.52036	0.0445171	-0.0374328
206	0000095-51-2	Training	0.840592	1.43099	0.98634	-0.590396	-0.145748
207	0000095-53-4	Training	0.44	1.36535	1.16793	-0.92535	-0.727933
208	0000095-56-7	Training	1.60582	1.00563	0.958138	0.600188	0.647678
209	0000095-57-8	Prediction	1.55629	1.24101	1.41089	0.315283	0.145399
210	0000095-63-6	Training	2.21531	2.36678	2.55979	-0.151473	-0.34448
211	0000095-64-7	Prediction	0.880708	1.54571	1.4924	-0.665001	-0.611696
212	0000095-68-1	Training	0.815	1.55907	1.30959	-0.744075	-0.494589
213	0000095-69-2	Training	1.43503	1.64309	1.24772	-0.208051	0.187313
214	0000095-73-8	Training	2.95	2.61339	2.79004	0.336613	0.159959
215	0000095-76-1	Training	1.26683	1.76159	1.47898	-0.49476	-0.212148
216	0000095-77-2	Training	1.71209	1.58084	1.86657	0.131246	-0.154481
217	0000095-78-3	Training	0.805702	1.56634	1.2941	-0.760633	-0.488399
218	0000095-82-9	Training	1.31974	1.78324	1.45388	-0.4635	-0.134137
219	0000095-94-3	Training	3.81198	3.21826	3.81077	0.593724	0.00120925
220	0000095-95-4	Training	2.27692	2.0207	2.51117	0.25622	-0.23425
221	0000096-12-8	Training	1.28306	1.12254	0.990106	0.16052	0.292955
222	0000096-18-4	Training	1.02525	1.25072	1.14515	-0.225472	-0.119902
223	0000096-29-7	Training	0.369687	0.12987	0.688712	0.239816	-0.319026
224	0000096-45-7	Training	-0.0301058	0.543469	0.501408	-0.573575	-0.531514
225	0000096-50-4	Training	0.065	0.287931	0.00521983	-0.222931	0.0597802
226	0000096-69-5	Prediction	0.816667	2.45549	2.8555	-1.63883	-2.03884	**	**			**
227	0000096-76-4	Training	2.49107	2.2652	1.87085	0.225867	0.620216
228	0000096-91-3	Training	0.355	0.563023	0.649683	-0.208023	-0.294683
229	0000096-96-8	Training	0.752658	0.533198	0.630371	0.21946	0.122287
230	0000097-00-7	Prediction	1.13	1.61967	1.92487	-0.489668	-0.794872
231	0000097-02-9	Training	1.11	0.618007	0.609115	0.491993	0.500885
232	0000097-23-4	Training	2.1106	2.37101	2.10322	-0.260409	0.0073755
233	0000097-77-8	Training	2.35	1.40936	1.07362	0.940643	1.27638				*
234	0000098-08-8	Training	1.64931	2.22711	2.25119	-0.577798	-0.601876
235	0000098-10-2	Training	0.409997	0.663714	-0.166173	-0.253716	0.57617
236	0000098-15-7	Prediction	2.08805	2.45609	2.33221	-0.368036	-0.244159
237	0000098-47-5	Training	0.7	0.667992	0.673143	0.0320076	0.0268574
238	0000098-54-4	Training	1.80248	1.6505	1.96905	0.151974	-0.166575
239	0000098-56-6	Training	2.21	2.45042	2.23807	-0.240423	-0.0280696
240	0000098-73-7	Training	0.43131	0.963625	1.37803	-0.532314	-0.946718
241	0000098-81-7	Training	2.19	2.13998	2.21728	0.050018	-0.0272763
242	0000098-82-8	Training	1.55	2.28664	2.47098	-0.736641	-0.920976
243	0000098-83-9	Prediction	1.85604	2.2801	2.5317	-0.424063	-0.675662
244	0000098-84-0	Training	0.685	1.5527	1.1176	-0.867698	-0.432603
245	0000098-95-3	Prediction	0.658806	1.25639	0.791315	-0.597581	-0.13251
246	0000099-08-1	Training	0.981287	1.4296	0.811906	-0.448312	0.169382
247	0000099-09-2	Training	0.688166	0.563077	0.615105	0.125089	0.0730607
248	0000099-54-7	Training	1.98282	1.8122	1.97392	0.170622	0.00889931
249	0000099-62-7	Training	2.94705	2.62164	2.8332	0.32541	0.113854
250	0000099-64-9	Training	1.105	0.387603	0.716499	0.717397	0.388501
251	0000099-65-0	Training	0.771545	1.38531	1.0878	-0.613763	-0.316251
252	0000099-71-8	Prediction	1.41362	1.54182	2.00793	-0.128204	-0.594314
253	0000099-88-7	Prediction	1.035	1.61916	1.57192	-0.584158	-0.536916
254	0000099-99-0	Training	0.970512	1.42479	0.803885	-0.454283	0.166626
255	0000100-00-5	Training	1.7452	1.49351	1.66479	0.251696	0.0804164
256	0000100-01-6	Training	0.685875	0.570594	0.605115	0.115281	0.0807594
257	0000100-02-7	Training	1.00581	0.413098	0.749063	0.592717	0.256752
258	0000100-17-4	Training	1.0479	1.26534	1.12624	-0.217438	-0.0783362
259	0000100-25-4	Prediction	-0.398455	1.38194	1.24495	-1.78039	-1.64341	**	**			**
260	0000100-26-5	Prediction	0.710175	0.0877615	0.779083	0.622413	-0.0689083
261	0000100-37-8	Prediction	0.29	0.521468	0.549134	-0.231468	-0.259134
262	0000100-40-3	Prediction	2.24959	2.12588	2.37552	0.123705	-0.12593
263	0000100-41-4	Training	1.19	2.11558	2.27293	-0.925581	-1.08293				*
264	0000100-42-5	Training	1.13	2.11101	2.26491	-0.981014	-1.13491				*
265	0000100-43-6	Training	1.92131	1.76596	1.50355	0.155353	0.417758
266	0000100-61-8	Training	0.70732	1.28916	0.769453	-0.581841	-0.0621332
267	0000100-66-3	Training	1.34	1.77359	1.50593	-0.433591	-0.165928
268	0000100-80-1	Prediction	1.55	2.28849	2.54041	-0.738487	-0.990412
269	0000101-02-0	Training	2.39223	2.58856	2.54537	-0.196332	-0.153149
270	0000101-14-4	Training	2.38047	2.41302	2.23485	-0.0325507	0.145622
271	0000101-20-2	Prediction	1.98	1.60974	1.56334	0.370257	0.416659
272	0000101-53-1	Training	1.46647	1.79826	2.05523	-0.331787	-0.588753
273	0000101-61-1	Training	2.74	2.33402	2.08524	0.405976	0.654762
274	0000101-67-7	Prediction	0.705	2.66815	2.72267	-1.96315	-2.01767	**	**			**
275	0000101-68-8	Training	2.35	1.54594	1.72793	0.804058	0.622065
276	0000101-70-2	Prediction	1.885	1.63284	2.19251	0.252163	-0.30751
277	0000101-77-9	Training	1.04535	1.87817	1.35824	-0.83282	-0.312898
278	0000101-81-5	Training	2.98731	2.65632	2.85767	0.330992	0.129641
279	0000101-84-8	Training	2.61861	2.35052	2.1497	0.268083	0.46891
280	0000102-06-7	Prediction	0.8	1.47893	1.28034	-0.678926	-0.480342
281	0000102-70-5	Training	0.687182	1.71134	1.37418	-1.02416	-0.687			*
282	0000102-71-6	Training	0.0975	0.446152	0.157191	-0.348652	-0.0596907
283	0000102-81-8	Training	1.145	1.0289	0.821212	0.116103	0.323788
284	0000102-82-9	Prediction	1.32132	1.99573	1.76577	-0.674411	-0.44445
285	0000103-23-1	Training	1.43	1.65995	1.61324	-0.229946	-0.183239
286	0000103-44-6	Training	3.00574	1.91476	1.5825	1.09098	1.42324			*	*		*
287	0000103-50-4	Training	2.50336	2.4398	2.23575	0.0635628	0.267607
288	0000103-64-0	Training	2.265	2.06033	2.12655	0.204672	0.13845
289	0000103-69-5	Prediction	1.01171	1.46101	1.23853	-0.449303	-0.226822
290	0000103-83-3	Training	0.952191	1.94046	1.6824	-0.988265	-0.730212
291	0000104-40-5	Training	2.52984	1.77799	2.108	0.751851	0.421841
292	0000104-43-8	Training	2.672	1.92355	2.22078	0.748445	0.451215
293	0000104-88-1	Training	0.742628	1.5648	1.80396	-0.822173	-1.06134				*
294	0000105-05-5	Training	2.46865	2.37712	2.57294	0.0915336	-0.104294
295	0000105-06-6	Training	2.48	2.36681	2.55476	0.113188	-0.0747605
296	0000105-67-9	Training	1.95	1.38842	1.65203	0.561581	0.297971
297	0000106-37-6	Training	2.16255	1.94561	1.94414	0.216941	0.218412
298	0000106-41-2	Prediction	1.653	0.943639	1.1579	0.709358	0.4951
299	0000106-42-3	Training	1.20333	2.18517	2.35376	-0.981836	-1.15043				*
300	0000106-43-4	Prediction	1.74157	2.27086	2.34286	-0.529286	-0.601291
301	0000106-46-7	Training	2.31632	2.41958	2.49591	-0.103258	-0.179589
302	0000106-47-8	Training	0.562076	1.39052	1.00243	-0.828442	-0.440356
303	0000106-48-9	Training	1.34273	1.17991	1.31066	0.162817	0.0320666
304	0000106-49-0	Training	0.61	1.3259	1.19655	-0.715898	-0.58655
305	0000106-50-3	Training	1.805	1.13227	0.763366	0.672734	1.04163				*
306	0000106-93-4	Training	0.608058	0.448771	0.349568	0.159287	0.25849
307	0000107-02-8	Prediction	2.54	-0.100959	-0.585589	2.64096	3.12559		**
308	0000107-05-1	Prediction	0.353257	0.5247	0.61623	-0.171444	-0.262973
309	0000107-06-2	Training	0.3	0.448771	0.349568	-0.148771	-0.0495681
310	0000107-13-1	Prediction	1.5	0.375806	0.311518	1.12419	1.18848	**	**			**
311	0000107-21-1	Training	-0.5	-0.680198	-0.662471	0.180198	0.162471
312	0000107-39-1	Prediction	2.81666	2.16315	2.43111	0.65351	0.385548
313	0000107-66-4	Training	0.426667	0.682375	0.808383	-0.255708	-0.381717
314	0000108-00-9	Prediction	0.25	0.423951	0.374356	-0.173951	-0.124356
315	0000108-36-1	Training	2.29667	1.95508	1.95498	0.34159	0.341691
316	0000108-38-3	Prediction	1.20333	2.19464	2.44379	-0.991303	-1.24045		**
317	0000108-39-4	Prediction	1.22667	1.14142	1.68402	0.085249	-0.457357
318	0000108-42-9	Training	0.328571	1.4076	0.99928	-1.07903	-0.670709			*
319	0000108-43-0	Training	1.11381	1.20426	1.29212	-0.0904486	-0.178311
320	0000108-45-2	Training	0.800508	1.14173	0.771186	-0.341225	0.029322
321	0000108-57-6	Training	2.54	2.37433	2.56297	0.165667	-0.0229738
322	0000108-60-1	Training	0.6973	1.59802	1.38692	-0.900718	-0.689624
323	0000108-67-8	Training	2.40398	2.36678	2.55979	0.0371982	-0.155809
324	0000108-70-3	Training	3.32008	2.81428	3.40568	0.505799	-0.0856014
325	0000108-78-1	Training	0.18	0.401459	0.0838333	-0.221459	0.0961667
326	0000108-80-5	Training	-0.65	0.613793	0.614592	-1.26379	-1.26459			*	*		*
327	0000108-86-1	Training	1.49272	1.82149	1.83551	-0.328764	-0.34279
328	0000108-87-2	Prediction	2.33252	2.02965	2.28308	0.302877	0.0494394
329	0000108-88-3	Prediction	1.505	1.98947	2.21818	-0.484471	-0.713184
330	0000108-90-7	Training	1.71093	2.05847	1.97987	-0.34754	-0.268939
331	0000108-95-2	Prediction	1.35143	0.869881	1.48412	0.481547	-0.132692
332	0000108-99-6	Prediction	0.97	1.6381	1.50581	-0.668095	-0.535806
333	0000109-02-4	Training	1	1.28175	1.00603	-0.281746	-0.00602864
334	0000109-06-8	Training	0.49	1.6381	1.35358	-1.1481	-0.863576			*
335	0000109-09-1	Training	1.41571	1.68014	1.24643	-0.264421	0.169285
336	0000109-69-3	Training	1.2148	0.977769	0.861255	0.237031	0.353545
337	0000109-70-6	Training	0.72	0.763286	0.648988	-0.0432863	0.0710124
338	0000110-00-9	Prediction	0.503763	1.18974	1.05344	-0.685973	-0.54968
339	0000110-02-1	Training	0.737535	1.18974	0.865962	-0.452201	-0.128427
340	0000110-16-7	Prediction	1	-0.377883	0.532969	1.37788	0.467031	**
341	0000110-30-5	Training	0.393333	1.59928	1.37367	-1.20595	-0.980333			*
342	0000110-81-6	Training	1.69	0.982485	0.579362	0.707515	1.11064				*
343	0000110-82-7	Training	1.95877	1.77564	1.87447	0.183126	0.0842942
344	0000110-83-8	Prediction	1.615	1.75715	1.96085	-0.142145	-0.345846
345	0000110-85-0	Prediction	0.22095	0.781615	0.80387	-0.560665	-0.58292
346	0000110-86-1	Prediction	1.94	1.35709	1.21603	0.582908	0.723967
347	0000110-91-8	Prediction	0.0726029	0.656043	0.659407	-0.58344	-0.586804
348	0000110-98-5	Training	0.392743	0.676966	0.459224	-0.284223	-0.0664812
349	0000111-27-3	Prediction	-0.272	0.550882	1.33416	-0.822882	-1.60616		**
350	0000111-40-0	Training	0.383215	0.410547	0.126217	-0.0273311	0.256998
351	0000111-41-1	Training	0.0761066	0.0291561	-0.183349	0.0469504	0.259456
352	0000111-44-4	Prediction	1.00987	1.00084	0.951944	0.00903265	0.0579254
353	0000111-76-2	Training	-0.22	0.388425	0.23461	-0.608425	-0.45461
354	0000111-84-2	Training	3.15	1.86725	1.99604	1.28275	1.15396			*	*		*
355	0000111-94-4	Training	-0.262433	0.73098	0.500038	-0.993413	-0.762471
356	0000112-24-3	Prediction	0.2	0.622763	0.536993	-0.422763	-0.336993
358	0000112-40-3	Training	2.53837	2.16233	2.35583	0.376043	0.182534
359	0000112-41-4	Training	3.4	2.15283	2.33885	1.24717	1.06115			*	*		*
360	0000113-00-8	Training	-1	-0.433415	-0.514441	-0.566585	-0.485559
361	0000115-28-6	Training	-0.072	1.39108	0.997125	-1.46308	-1.06912			*	*		*
362	0000115-29-7	Training	2.29561	2.08273	2.31594	0.212879	-0.0203246
363	0000115-32-2	Training	3.68262	3.18428	3.04859	0.498337	0.634029
364	0000115-77-5	Prediction	-0.0297518	0.855409	0.799538	-0.885161	-0.829289
365	0000115-86-6	Training	2.62769	1.93051	2.09495	0.697181	0.532736
366	0000115-90-2	Prediction	1.68	1.42916	1.75809	0.250843	-0.0780938
367	0000115-96-8	Prediction	0.143229	1.08105	1.24112	-0.937821	-1.09789		**
368	0000117-18-0	Training	3.0068	2.55195	2.41682	0.454858	0.589979
369	0000117-79-3	Training	1.92824	1.32095	0.991101	0.607295	0.93714
370	0000117-80-6	Training	4.04	1.76947	1.90801	2.27053	2.13199			*	*		*
371	0000117-81-7	Training	2.1692	1.82052	1.73784	0.34868	0.431353
372	0000117-84-0	Training	2.66667	1.76215	1.69415	0.904517	0.972513
373	0000118-44-5	Training	2.54579	2.08842	2.13981	0.457367	0.405981
374	0000118-69-4	Training	2.835	2.6285	2.80891	0.206501	0.0260933
375	0000118-74-1	Prediction	3.88382	4.18609	4.53455	-0.302268	-0.650731
376	0000118-79-6	Prediction	2.51253	1.3474	1.08913	1.16513	1.4234	**	**			**
377	0000118-82-1	Prediction	2.42833	3.14249	2.66249	-0.714159	-0.234156
378	0000118-83-2	Training	2.42914	1.78818	2.00067	0.640969	0.428475
379	0000118-91-2	Training	0.6	0.675293	1.1849	-0.0752931	-0.584901
380	0000118-96-7	Training	0.643	1.58702	1.60718	-0.944021	-0.964176
381	0000119-06-2	Prediction	1.17	1.9858	1.99755	-0.815801	-0.827554
382	0000119-12-0	Training	1.53262	1.38212	1.55056	0.150499	-0.0179481
383	0000119-33-5	Training	1.61345	0.624017	0.853986	0.989432	0.759463
384	0000119-47-1	Training	2.3698	2.82439	2.76166	-0.454581	-0.391857
385	0000119-56-2	Training	1.6869	2.30045	2.11095	-0.613555	-0.424053
386	0000119-61-9	Training	0.934123	1.92105	1.20924	-0.986928	-0.275117
387	0000119-64-2	Prediction	2.48	2.53955	2.79275	-0.0595497	-0.312749
388	0000119-93-7	Training	1.61244	2.06846	1.50677	-0.456022	0.105673
389	0000120-12-7	Prediction	3.03433	2.94803	3.16334	0.0862974	-0.129015
390	0000120-52-5	Training	0.495126	1.73193	1.91999	-1.2368	-1.42486			*	*		*
391	0000120-54-7	Prediction	1.11774	1.67543	1.64875	-0.557688	-0.531006
392	0000120-71-8	Training	0.917	1.29257	0.89893	-0.375566	0.0180696
393	0000120-78-5	Prediction	1.19598	1.89119	1.95497	-0.695211	-0.758991
394	0000120-82-1	Training	2.94404	2.81428	3.40568	0.129759	-0.461641
395	0000120-95-6	Training	2.63	2.41671	2.07671	0.213289	0.553287
396	0000121-03-9	Prediction	0.105	0.830423	0.939113	-0.725423	-0.834113
397	0000121-14-2	Training	0.852343	1.50565	1.28121	-0.653302	-0.428862
398	0000121-44-8	Training	0.196	1.38994	0.915184	-1.19394	-0.719184			*
399	0000121-57-3	Prediction	0.035	0.559257	0.833214	-0.524257	-0.798214
400	0000121-69-7	Training	0.96557	1.86939	1.61403	-0.903818	-0.648465
401	0000121-73-3	Training	1.94907	1.49804	1.67863	0.451021	0.270431
402	0000121-75-5	Prediction	0.994439	0.944444	1.10239	0.0499956	-0.107955
403	0000121-82-4	Training	0.530465	1.19316	1.41162	-0.662698	-0.881153
404	0000121-86-8	Prediction	1.69	1.66432	2.02122	0.0256844	-0.331221
405	0000121-92-6	Training	0.45	0.415614	0.667941	0.0343857	-0.217941
406	0000122-14-5	Training	1.82705	1.47201	1.65954	0.35504	0.167505
407	0000122-20-3	Prediction	-0.73	1.07054	0.941075	-1.80054	-1.67108	**	**			**
408	0000122-34-9	Training	1.48934	0.988929	1.24215	0.500409	0.247193
409	0000122-39-4	Training	2.007	1.89837	1.56594	0.108622	0.441061
410	0000122-57-6	Prediction	0.745	1.59292	1.0926	-0.847916	-0.347603
411	0000122-80-5	Training	0.355	0.554131	0.64285	-0.199131	-0.28785
412	0000123-30-8	Training	1.625	0.852818	0.568325	0.772182	1.05668				*
413	0000123-31-9	Training	1.585	0.894658	0.657856	0.690342	0.927144
414	0000123-33-1	Prediction	-0.2	0.755204	0.854313	-0.955204	-1.05431		**
415	0000123-48-8	Training	3.29	2.62584	2.85773	0.664159	0.432275
416	0000123-63-7	Training	0.04625	1.57039	1.31601	-1.52414	-1.26976			*	*		*
417	0000123-77-3	Prediction	1.175	-0.619543	0.426125	1.79454	0.748875	**
418	0000123-91-1	Training	-0.272257	1.14331	0.821071	-1.41557	-1.09333			*	*		*
419	0000124-11-8	Prediction	2.17897	1.8546	2.08197	0.32437	0.0969977
420	0000124-64-1	Prediction	1.97	0.81796	0.726507	1.15204	1.24349	**	**			**
421	0000124-73-2	Training	1.565	2.03986	2.04123	-0.474858	-0.476235
422	0000126-30-7	Training	0.230541	0.841556	0.690797	-0.611015	-0.460256
423	0000126-33-0	Training	0.581429	1.09066	0.854654	-0.509235	-0.273226
424	0000126-58-9	Training	0.31	1.18937	0.789768	-0.879374	-0.479768
425	0000126-72-7	Training	1.41658	1.39402	1.49275	0.0225524	-0.0761747
426	0000126-73-8	Training	1.2945	1.49586	1.49963	-0.201359	-0.20513
427	0000127-18-4	Prediction	1.71746	1.68808	1.8847	0.0293769	-0.167237
428	0000127-20-8	Training	0.651362	-0.0882275	0.381962	0.739589	0.269399
429	0000127-27-5	Training	1.84866	2.02043	1.70766	-0.171775	0.141002
430	0000127-68-4	Prediction	0.46366	0.667992	0.874564	-0.204332	-0.410903
431	0000127-90-2	Training	2.66647	2.17516	2.10506	0.49131	0.561407
432	0000128-37-0	Training	3.20018	2.50082	2.54336	0.699364	0.656826
433	0000128-39-2	Training	2.82	2.39417	2.28751	0.425832	0.532494
434	0000129-00-0	Prediction	2.8858	3.2079	3.37471	-0.322097	-0.48891
435	0000129-43-1	Training	1.88499	1.3733	1.04279	0.511692	0.842197
436	0000130-13-2	Training	0.961429	1.10953	0.927351	-0.1481	0.0340774
437	0000131-09-9	Training	2.33024	2.29222	2.47971	0.0380238	-0.14947
438	0000131-11-3	Training	1.76	1.2848	1.33266	0.475198	0.427342
439	0000131-52-2	Training	2.09164	2.961	2.54392	-0.869362	-0.452276
440	0000131-55-5	Training	0.022	0.909853	0.900048	-0.887853	-0.878048
441	0000131-57-7	Prediction	1.94874	1.08346	1.09185	0.865287	0.856894
442	0000132-64-9	Prediction	3.27605	2.62535	2.513	0.650706	0.763053
443	0000132-65-0	Training	3.26452	2.62535	2.43926	0.639173	0.825263
444	0000134-32-7	Training	1.44115	1.84998	1.53972	-0.40883	-0.0985687
445	0000134-47-4	Training	1.06	1.04474	0.932247	0.0152641	0.127753
446	0000134-62-3	Training	0.350532	1.50871	1.52061	-1.15817	-1.17007			*	*		*
447	0000135-88-6	Training	2.33035	2.30479	2.2853	0.0255556	0.0450521
448	0000137-26-8	Prediction	0.527715	1.05302	1.00497	-0.525308	-0.477251
449	0000137-30-4	Training	2.31	0.458605	0.715543	1.85139	1.59446			*	*		*
450	0000139-13-9	Training	1.75	-0.284967	0.364392	2.03497	1.38561			*	*		*
451	0000139-87-7	Training	0.54	0.481837	0.227761	0.0581629	0.312239
452	0000140-66-9	Prediction	1.73667	2.05864	2.27002	-0.321972	-0.533352
453	0000141-78-6	Training	1.48	0.47267	0.167835	1.00733	1.31217			*	*		*
454	0000141-93-5	Training	2.78784	2.38464	2.58115	0.4032	0.206687
455	0000142-96-1	Training	1.90385	1.57042	1.15011	0.333435	0.753743
456	0000143-50-0	Training	3.1672	3.03801	2.59627	0.129183	0.57093
457	0000144-19-4	Prediction	-0.222879	1.45793	1.33243	-1.68081	-1.55531	**	**			**
458	0000145-73-3	Training	1	0.67807	0.829838	0.32193	0.170162
459	0000148-24-3	Training	1.115	1.36776	1.00843	-0.25276	0.106566
460	0000149-30-4	Training	0.4	1.75813	1.80134	-1.35813	-1.40134			*	*		*
461	0000151-21-3	Training	0.0759091	0.897249	0.774947	-0.82134	-0.699038
462	0000152-11-4	Training	1.27687	2.12968	1.45203	-0.85281	-0.175158
463	0000156-43-4	Training	0.58	1.19272	0.820644	-0.612718	-0.240644
464	0000184-90-8	Prediction	1.295	1.64003	1.75669	-0.345034	-0.461692
465	0000198-55-0	Prediction	2.38	3.43571	3.53971	-1.05571	-1.15971	**	**			**
466	0000206-44-0	Prediction	3.322	3.2214	3.38478	0.100598	-0.0627774
467	0000208-96-8	Prediction	2.76027	2.91063	3.13524	-0.150358	-0.374971
468	0000217-59-4	Training	2.41	3.25563	3.40252	-0.84563	-0.992516
469	0000218-01-9	Prediction	2.4	3.24018	3.39525	-0.840179	-0.995254
470	0000218-17-8	Prediction	0.46	1.23684	1.4994	-0.776842	-1.0394		**
471	0000218-21-0	Training	0	1.12613	1.17606	-1.12613	-1.17606			*	*		*
472	0000225-11-6	Training	2.025	2.93991	2.72566	-0.91491	-0.700665
473	0000226-36-8	Prediction	2.46485	3.16113	2.95076	-0.696287	-0.485916
474	0000260-94-6	Training	2.37	2.64134	2.45183	-0.271339	-0.0818254
475	0000262-12-4	Training	3.85	2.37619	2.27974	1.47381	1.57026			*	*		*
476	0000271-89-6	Training	2.56	2.14799	1.94812	0.412008	0.611884
477	0000280-57-9	Prediction	0.69	1.65754	1.49247	-0.967543	-0.802467
478	0000281-23-2	Prediction	3.42	2.81122	3.05346	0.608784	0.366539
479	0000294-62-2	Training	3.53376	2.32928	2.54158	1.20448	0.992181			*
480	0000298-00-0	Training	1.11908	1.36468	1.49549	-0.245602	-0.376411
481	0000298-02-2	Prediction	1.95	1.62003	1.77506	0.329972	0.174943
482	0000298-04-4	Prediction	2.08222	1.69335	1.83694	0.388869	0.245283
483	0000298-06-6	Training	0.358333	1.18275	1.25606	-0.824414	-0.897723
484	0000298-07-7	Training	0.586557	1.36369	1.0713	-0.777135	-0.484742
485	0000299-84-3	Training	2.09112	2.73534	2.35368	-0.644222	-0.26256
486	0000300-76-5	Training	0.93	1.05063	1.03507	-0.120632	-0.105074
487	0000306-52-5	Training	0.145067	0.291287	-0.295705	-0.14622	0.440772
488	0000306-83-2	Prediction	1.355	1.55983	1.57273	-0.204829	-0.21773
489	0000306-98-9	Training	3.92	3.72468	3.76029	0.195321	0.159706
490	0000307-34-6	Training	3.59	3.65682	3.72777	-0.0668175	-0.137772
491	0000307-55-1	Training	3.08111	1.89125	2.39797	1.18986	0.683144			*
492	0000307-70-0	Training	3.355	2.41589	2.82639	0.939114	0.52861
493	0000309-00-2	Training	2.43578	3.28961	3.31527	-0.853829	-0.879496
495	0000314-40-9	Training	0.706287	1.101	1.14792	-0.394715	-0.441635
496	0000315-18-4	Prediction	1.41667	0.571604	0.96328	0.845063	0.453386
497	0000318-98-9	Training	2.2875	1.81432	1.74901	0.473183	0.538491
498	0000319-84-6	Prediction	2.78649	2.46479	2.56416	0.321705	0.222329
499	0000320-60-5	Training	2.42404	2.771	2.4849	-0.34696	-0.0608593
500	0000328-84-7	Prediction	3.095	2.75628	2.5395	0.338717	0.555496
501	0000330-54-1	Training	1.24053	1.00658	0.880992	0.233951	0.359542
502	0000330-55-2	Prediction	1.06586	0.955844	1.02438	0.110015	0.0414799
503	0000333-41-5	Training	1.86678	1.93663	2.11102	-0.0698506	-0.244245
504	0000335-36-4	Training	3.4675	3.39267	3.10291	0.0748267	0.364591
505	0000335-57-9	Training	3.5	3.54331	3.65186	-0.0433052	-0.151856
506	0000335-67-1	Prediction	2.116	1.46431	2.16256	0.651686	-0.0465586
507	0000335-76-2	Prediction	3.58833	1.70298	2.3358	1.88535	1.25254	**	**			**
508	0000335-99-9	Training	1.36	1.87328	2.16602	-0.513278	-0.806025
509	0000346-10-1	Training	1.976	1.0059	0.969047	0.970104	1.00695				*
510	0000351-00-2	Training	0.1	0.949059	0.888774	-0.849059	-0.788774
511	0000355-80-6	Training	0.97	1.42021	1.64215	-0.450214	-0.672154
512	0000360-97-4	Training	0.715	-0.0928487	0.497674	0.807849	0.217326
513	0000375-95-1	Prediction	3.4	1.5915	2.2545	1.8085	1.1455	**	**			**
514	0000376-06-7	Prediction	4.03125	2.04628	2.59059	1.98497	1.44066	**	**			**
515	0000402-31-3	Prediction	2.51	2.60041	2.71036	-0.0904098	-0.200363
516	0000461-58-5	Prediction	0.086	-0.165358	-0.085918	0.251358	0.171918
517	0000462-08-8	Prediction	-0.19	0.775132	0.703301	-0.965132	-0.893301
518	0000471-77-2	Training	2.13704	1.99138	1.67997	0.145657	0.457067
519	0000473-54-1	Training	0.83	2.41872	2.48203	-1.58872	-1.65203			*	*		*
520	0000475-03-6	Prediction	3.33	2.90148	3.12395	0.428516	0.206053
521	0000479-27-6	Training	0.750918	1.80478	1.26916	-1.05387	-0.518241			*
522	0000482-89-3	Prediction	0.456903	1.2607	1.13177	-0.803801	-0.67487
523	0000488-23-3	Training	2.82	2.52823	2.73416	0.291769	0.0858353
524	0000492-97-7	Training	3.55	1.93224	1.82278	1.61776	1.72722			*	*		*
525	0000493-01-6	Training	3.33307	2.56706	2.78911	0.766011	0.543958
526	0000496-10-6	Training	2.91	2.51532	2.73439	0.394675	0.17561
527	0000497-18-7	Prediction	0.65	-0.482205	0.459789	1.1322	0.190211	**
528	0000500-28-7	Prediction	0.571359	1.58313	2.0264	-1.01177	-1.45504	**	**			**
529	0000504-03-0	Training	0.2	1.69623	1.32556	-1.49623	-1.12556			*	*		*
530	0000504-24-5	Training	0.347069	0.788498	0.491816	-0.441429	-0.144747
531	0000504-29-0	Training	1.05267	0.746254	0.477231	0.306414	0.575437
532	0000504-53-0	Training	1.22	2.38376	1.84045	-1.16376	-0.620452			*
533	0000509-34-2	Training	0.46	1.7384	1.36864	-1.2784	-0.908637			*
534	0000510-15-6	Training	2.0003	2.00284	2.65456	-0.00254466	-0.654257
535	0000512-34-5	Training	0.54	0.712569	1.23161	-0.172569	-0.691613
536	0000512-56-1	Training	-0.179228	0.872156	0.730267	-1.05138	-0.909495			*
537	0000514-10-3	Prediction	1.90184	1.98669	1.80745	-0.0848438	0.0943936
538	0000520-45-6	Training	2.12012	0.563868	0.766729	1.55625	1.35339			*	*		*
539	0000526-73-8	Prediction	2.31599	2.38189	2.64014	-0.0658981	-0.324141
540	0000526-78-3	Training	0.335597	0.00407191	0.437216	0.331525	-0.101619
541	0000527-20-8	Training	2.94	2.98036	2.78685	-0.040364	0.153153
542	0000527-60-6	Prediction	0.867312	1.63003	1.78945	-0.762717	-0.922139
543	0000534-52-1	Prediction	0.129038	0.735107	0.904895	-0.606069	-0.775857
544	0000535-77-3	Prediction	2.9265	2.4354	2.69556	0.491094	0.230932
545	0000538-75-0	Training	0.124	2.23033	2.03119	-2.10633	-1.90719			*	*		*
546	0000540-84-1	Training	2.785	2.17738	2.3765	0.607622	0.408496
547	0000541-73-1	Training	2.48135	2.42905	2.50822	0.0522984	-0.0268691
548	0000542-18-7	Prediction	2.34619	1.88845	2.0575	0.457738	0.288689
549	0000544-01-4	Training	2.63808	1.93954	1.59466	0.698539	1.04341				*
550	0000544-76-3	Training	1.24875	2.4381	2.66647	-1.18935	-1.41772			*	*		*
551	0000554-00-7	Training	1.56092	1.77562	1.46135	-0.214696	0.099577
552	0000554-84-7	Training	1.4	0.422409	0.75072	0.977591	0.64928
553	0000555-03-3	Training	1.25994	1.26881	1.14351	-0.00886996	0.116433
554	0000563-04-2	Training	2.84286	2.08	2.23011	0.762857	0.612745
555	0000567-77-6	Prediction	2.69	2.36987	2.62515	0.320133	0.0648545
556	0000575-41-7	Training	3.13154	2.75955	2.95815	0.371991	0.173387
557	0000576-24-9	Training	1.71985	1.63823	1.75832	0.0816229	-0.0384709
558	0000577-11-7	Training	0.542222	1.07362	0.876287	-0.531394	-0.334065
559	0000577-55-9	Training	2.14	2.6492	2.86087	-0.509205	-0.720872
560	0000579-10-2	Training	0.698378	1.27543	1.2827	-0.577056	-0.58432
561	0000579-66-8	Training	2.08	1.83032	1.41206	0.249679	0.667936
562	0000581-40-8	Training	2.71	2.75022	2.94918	-0.0402172	-0.239184
563	0000583-39-1	Prediction	0.419932	1.22783	1.32898	-0.807899	-0.909049
564	0000583-53-9	Training	3.1	1.96443	1.96568	1.13557	1.13432			*	*		*
565	0000583-78-8	Training	1.18282	1.62312	1.74392	-0.440295	-0.5611
566	0000584-79-2	Prediction	2.265	2.12943	2.30907	0.135568	-0.0440746
567	0000584-84-9	Training	2.45	1.10951	1.23392	1.34049	1.21608			*	*		*
568	0000586-76-5	Training	1.005	0.393531	0.87622	0.611469	0.12878
569	0000591-20-8	Training	1.47082	0.968301	0.974718	0.50252	0.496103
570	0000591-27-5	Training	1.148	0.869547	0.583772	0.278453	0.564228
571	0000591-35-5	Training	2.16716	1.59572	1.82135	0.571441	0.34581
572	0000599-61-1	Training	0.465	0.967565	0.772658	-0.502565	-0.307658
573	0000599-64-4	Training	2.275	2.09619	2.15615	0.178811	0.118852
574	0000603-11-2	Training	0.288757	0.509783	0.740198	-0.221026	-0.451441
575	0000605-02-7	Training	3.51	3.01639	3.19858	0.49361	0.31142
576	0000606-20-2	Training	1.34154	1.52486	1.30151	-0.183319	0.0400368
577	0000606-28-0	Training	1.32738	1.76446	1.84633	-0.437078	-0.518949
578	0000607-99-8	Training	2.735	2.00811	1.91172	0.726891	0.823281
579	0000608-71-9	Training	0.79	1.78205	1.21918	-0.992049	-0.42918
580	0000608-93-5	Prediction	3.81084	3.66369	4.28092	0.147153	-0.470075
581	0000609-89-2	Prediction	1.38091	1.08857	1.36561	0.292342	0.0153082
582	0000610-39-9	Training	1.37286	1.51531	1.29143	-0.142455	0.0814269
583	0000611-06-3	Training	1.99526	1.81986	1.99433	0.175405	0.000928268
584	0000611-21-2	Prediction	0.686823	1.53668	1.25076	-0.849854	-0.563936
585	0000612-22-6	Training	0.905358	1.54808	0.971308	-0.64272	-0.0659496
586	0000613-12-7	Training	2.41	3.00999	3.19084	-0.599987	-0.780839
587	0000615-54-3	Training	2.77752	2.10332	2.11327	0.674201	0.664254
588	0000615-58-7	Training	1.45	1.13658	0.906146	0.313419	0.543854
589	0000615-59-8	Prediction	2.67	2.13941	2.26559	0.530586	0.404408
590	0000615-74-7	Training	0.46462	1.48455	1.49239	-1.01993	-1.02777			*	*		*
591	0000616-44-4	Training	0.668638	1.52002	1.22483	-0.851378	-0.556189
592	0000618-62-2	Prediction	2.16999	1.80968	2.08513	0.360307	0.0848511
593	0000620-92-8	Training	1.075	1.72347	1.41695	-0.648474	-0.341949
594	0000622-24-2	Training	1.865	2.07064	2.14414	-0.205642	-0.279136
595	0000622-57-1	Training	0.653717	1.64379	1.37361	-0.990068	-0.719895
596	0000622-97-9	Training	1.5	2.2801	2.45942	-0.780104	-0.959418
597	0000623-26-7	Training	0.45848	1.97463	1.78697	-1.51615	-1.32849			*	*		*
598	0000626-17-5	Training	0.864328	1.98215	1.79573	-1.11782	-0.931405			*
599	0000626-23-3	Prediction	0.475	1.62801	1.23439	-1.15301	-0.759392	**
600	0000626-39-1	Prediction	3.84883	2.10332	2.21057	1.74551	1.63825	**	**			**
601	0000626-67-5	Prediction	0.84471	1.6181	1.40341	-0.77339	-0.558698
602	0000629-25-4	Training	2.406	0.619159	1.25484	1.78684	1.15116			*	*		*
603	0000629-62-9	Training	1.364	2.37753	2.60054	-1.01353	-1.23654			*	*		*
604	0000634-66-2	Prediction	3.681	3.23088	3.79427	0.450119	-0.113274
605	0000634-67-3	Prediction	2.094	2.165	2.28637	-0.0710018	-0.192371
606	0000634-83-3	Prediction	2.45	2.5541	2.74684	-0.104099	-0.296835
607	0000634-90-2	Prediction	2.94312	3.22459	3.78984	-0.281471	-0.846721
608	0000634-91-3	Training	2.42	2.14469	2.1962	0.275312	0.223802
609	0000634-93-5	Training	2.18821	2.17274	2.19353	0.0154722	-0.00531273
610	0000636-28-2	Training	2.92442	2.27031	2.31139	0.654106	0.61303
611	0000636-30-6	Training	2.205	2.15238	2.18261	0.0526217	0.0223895
612	0000647-42-7	Training	1.76	2.02771	2.08077	-0.267714	-0.320775
613	0000678-39-7	Training	2.765	2.30802	2.36965	0.456978	0.395346
614	0000680-31-9	Prediction	-0.043	1.02399	1.11974	-1.06699	-1.16274	**	**			**
615	0000696-44-6	Training	0.788262	1.5068	1.01482	-0.718541	-0.226561
616	0000698-83-6	Prediction	1.56	0.392333	0.810548	1.16767	0.749452	**
617	0000709-98-8	Training	1.945	1.29759	1.24052	0.647405	0.70448
618	0000729-33-5	Prediction	2.63	2.48158	2.92152	0.148423	-0.291517
619	0000731-27-1	Training	1.95	1.40622	1.60227	0.54378	0.347734
620	0000732-11-6	Training	0.522038	1.1805	1.29702	-0.658458	-0.774984
621	0000732-26-3	Prediction	4.17334	2.75426	2.79407	1.41908	1.37928	**	**			**
622	0000759-94-4	Training	1.78	0.900411	0.790962	0.879589	0.989038
623	0000760-23-6	Training	0.757195	1.29184	1.20045	-0.534641	-0.443256
624	0000764-13-6	Training	2.37385	1.92613	2.05749	0.44772	0.316364
625	0000767-00-0	Prediction	0.91	0.945355	0.850131	-0.0353547	0.0598691
626	0000779-02-2	Training	3.19	3.03356	3.21132	0.156441	-0.0213184
627	0000782-74-1	Training	3.37313	2.36481	2.55222	1.00831	0.820905			*
628	0000786-19-6	Training	2.768	2.18286	2.05766	0.585136	0.710335
629	0000788-59-2	Training	0.76	0.644387	0.593732	0.115613	0.166268
630	0000789-02-6	Training	3.595	3.37662	3.57757	0.218384	0.0174262
631	0000800-28-0	Training	2.23	0.333399	1.27392	1.8966	0.956081			*
632	0000801-01-1	Training	1.46	2.19752	2.12657	-0.737523	-0.666567
633	0000803-20-2	Prediction	1.48	0.901058	1.00152	0.578942	0.478482
634	0000805-75-8	Prediction	0.36	-0.173659	0.687496	0.533659	-0.327496
635	0000808-31-5	Prediction	3.13	2.68762	2.70768	0.442379	0.422322
636	0000822-77-5	Prediction	0.595	1.32974	1.09148	-0.734735	-0.496482
637	0000827-21-4	Training	0.13	0.988359	0.403705	-0.858359	-0.273705
638	0000829-26-5	Training	3	2.83528	3.03018	0.164724	-0.0301773
639	0000832-69-9	Training	3.18	3.03356	3.21132	0.146441	-0.0313184
640	0000834-12-8	Training	1.17333	0.775474	1.28727	0.39786	-0.113939
641	0000839-90-7	Training	-0.2	-0.290663	0.386736	0.0906627	-0.586736
642	0000840-65-3	Training	1.58	1.61008	1.71887	-0.0300759	-0.138869
643	0000842-18-2	Training	0	1.16975	0.900214	-1.16975	-0.900214			*
644	0000843-55-0	Training	1.605	2.25669	1.73713	-0.651689	-0.132127
645	0000872-05-9	Training	3.22	1.96674	2.11444	1.25326	1.10556			*	*		*
646	0000873-63-2	Training	1.35059	1.35864	1.52906	-0.00804548	-0.178474
647	0000875-35-4	Training	0.59	2.35846	1.95017	-1.76846	-1.36017			*	*		*
648	0000877-10-1	Prediction	2.73282	3.44061	3.90969	-0.707788	-1.17687		**
649	0000877-11-2	Training	2.57144	3.69022	4.31271	-1.11878	-1.74128			*	*		*
650	0000879-39-0	Prediction	1.60409	2.54987	2.46778	-0.945776	-0.863687
651	0000882-33-7	Training	0.905	2.32718	2.1691	-1.42218	-1.2641			*	*		*
652	0000883-20-5	Prediction	2.19453	3.03687	3.2319	-0.84234	-1.03737		**
653	0000886-50-0	Training	1.95	0.916827	1.47686	1.03317	0.473136			*
654	0000901-44-0	Training	1.185	1.67354	1.2745	-0.488537	-0.0894958
655	0000903-19-5	Prediction	2.475	2.82132	2.77997	-0.346324	-0.304969
656	0000909-55-4	Training	2.14333	2.9447	3.16775	-0.801368	-1.02442				*
657	0000920-66-1	Prediction	0.2739	0.964154	1.49915	-0.690254	-1.22525		**
658	0000930-10-9	Training	1.5	0.516599	0.623386	0.983401	0.876614
659	0000933-12-0	Prediction	2.87	2.45443	2.72691	0.415567	0.143091
660	0000935-95-5	Prediction	2.15	2.50776	2.67351	-0.35776	-0.52351
661	0000938-22-7	Training	3.34	3.0664	3.25768	0.273605	0.0823238
662	0000938-86-3	Training	3.45663	3.06146	3.25341	0.395168	0.203217
663	0000944-22-9	Training	1.89	2.19474	2.10211	-0.304743	-0.212113
664	0000944-61-6	Training	4.40001	2.99403	3.42194	1.40598	0.978071			*
665	0000946-30-5	Prediction	0.395714	0.938709	1.03945	-0.542995	-0.643732
666	0000947-04-6	Training	0.244876	1.04384	0.740973	-0.798964	-0.496097
667	0000947-72-8	Training	2.47083	3.17958	3.31882	-0.708745	-0.847983
668	0000948-65-2	Training	2.555	2.24004	2.14063	0.314962	0.414373
669	0000950-37-8	Prediction	0.97056	0.528253	0.827117	0.442307	0.143443
670	0000961-11-5	Prediction	1.66991	2.28684	2.38816	-0.616937	-0.718257
671	0000962-58-3	Training	0.627436	1.29662	1.30917	-0.66918	-0.681732
672	0000986-94-6	Training	2.46	2.12976	2.3044	0.330244	0.155602
673	0000990-23-3	Training	1.49	1.68522	1.72564	-0.195224	-0.23564
674	0000991-32-9	Prediction	1.76	1.91867	2.27895	-0.15867	-0.51895
675	0000993-52-1	Training	0.26	1.17469	0.89303	-0.914687	-0.63303
676	0000999-73-0	Training	1	0.622256	0.83073	0.377744	0.16927
677	0001000-76-6	Training	3.5	3.00886	3.17018	0.491139	0.329822
678	0001014-70-6	Training	2.07111	0.667071	1.12767	1.40404	0.943438			*
679	0001024-57-3	Prediction	4.1	3.02407	3.01848	1.07593	1.08152	**	**			**
680	0001071-83-6	Training	1.30286	-0.158196	0.411157	1.46105	0.8917			*
681	0001073-72-9	Prediction	0.895	0.919821	0.829067	-0.024821	0.0659335
682	0001074-24-4	Training	3.16	2.3046	2.36715	0.855398	0.792847
683	0001116-76-3	Prediction	1.95652	2.56144	2.35046	-0.604915	-0.393937
684	0001120-01-0	Training	1.86	1.10898	1.09383	0.751023	0.766172
685	0001141-38-4	Prediction	0.512327	0.908644	1.09591	-0.396318	-0.583579
686	0001163-19-5	Prediction	1.26667	3.06921	2.9085	-1.80254	-1.64183	**	**			**
687	0001190-72-3	Prediction	1.442	1.52152	1.31978	-0.0795187	0.122225
688	0001191-50-0	Training	1.04	1.00951	0.937869	0.0304858	0.102131
689	0001193-65-3	Training	0.77	1.32176	1.34626	-0.551756	-0.576262
690	0001197-18-8	Training	1.01	0.593201	0.768176	0.416799	0.241824
691	0001212-29-9	Training	0.669367	1.98508	1.49449	-1.31571	-0.825128			*
692	0001222-05-5	Prediction	3.02	3.11644	2.91079	-0.0964427	0.109214
693	0001235-13-4	Prediction	0.646667	1.0667	1.11431	-0.420031	-0.467645
694	0001241-94-7	Prediction	2.69472	1.96128	2.17005	0.733438	0.524675
695	0001300-33-3	Training	0.133333	1.08475	0.838942	-0.951421	-0.705609
696	0001321-74-0	Prediction	2.54757	2.39648	2.65011	0.151088	-0.102543
697	0001322-93-6	Training	0.407876	1.79172	0.855082	-1.38384	-0.447206			*
698	0001323-65-5	Prediction	2.29	2.48004	2.3927	-0.190042	-0.102699
699	0001330-16-1	Training	2.61	2.83753	3.0465	-0.227532	-0.436502
700	0001330-78-5	Prediction	2.62796	2.08638	2.31536	0.541588	0.312604
701	0001420-06-0	Training	3.11	2.80096	2.65099	0.309042	0.459006
702	0001445-75-6	Prediction	0	1.38093	1.47726	-1.38093	-1.47726	**	**			**
703	0001460-02-2	Training	3.37275	3.1579	3.33008	0.214855	0.0426787
704	0001477-55-0	Training	-0.045	1.4466	0.954993	-1.4916	-0.999993			*	*		*
705	0001490-04-6	Prediction	0.981677	1.96731	1.71938	-0.985633	-0.7377
706	0001502-22-3	Training	0.841286	1.92535	1.24196	-1.08407	-0.400678			*
707	0001506-02-1	Prediction	2.78	2.48632	2.22402	0.29368	0.555978
708	0001544-19-0	Training	4.35	2.74056	2.82595	1.60944	1.52405			*	*		*
709	0001552-42-7	Prediction	3.165	1.53041	1.27665	1.63459	1.88835	**	**			**
710	0001570-64-5	Training	1.56815	1.46901	1.52483	0.0991419	0.0433138
711	0001582-09-8	Training	3.30383	1.64952	2.00425	1.65431	1.29958			*	*		*
712	0001591-88-5	Training	0.17	1.20941	0.851526	-1.03941	-0.681526			*
713	0001610-18-0	Training	0.89	0.874547	1.41879	0.015453	-0.528795
714	0001623-19-4	Training	0.774394	1.28705	1.29678	-0.512653	-0.522385
715	0001631-58-9	Training	1.69121	1.44223	1.30716	0.248982	0.384046
716	0001634-04-4	Training	0.18	1.51472	1.11316	-1.33472	-0.933158			*
717	0001634-78-2	Training	0.399083	0.958901	0.895889	-0.559818	-0.496806
718	0001667-10-3	Training	1.19	2.74435	2.85397	-1.55435	-1.66397			*	*		*
719	0001678-91-7	Training	3.425	2.15283	2.33885	1.27217	1.08615			*	*		*
720	0001678-98-4	Training	3.3	2.37782	2.59548	0.922179	0.704516
721	0001687-30-5	Training	1.09286	0.618433	0.786393	0.474425	0.306464
722	0001689-83-4	Training	1.46	1.22056	0.67361	0.239437	0.78639
723	0001689-84-5	Prediction	1.255	1.22242	0.875088	0.032578	0.379912
724	0001702-17-6	Training	0	0.628438	0.511958	-0.628438	-0.511958
726	0001712-70-5	Prediction	3.2639	2.52972	2.6477	0.734188	0.616208
727	0001740-19-8	Training	1.884	1.96947	1.66611	-0.0854701	0.217891
728	0001746-01-6	Training	3.22162	3.39107	3.62841	-0.169456	-0.406791
729	0001746-81-2	Training	1.3025	0.658692	0.69388	0.643808	0.60862
730	0001779-48-2	Training	0.310514	0.582024	0.150365	-0.27151	0.160149
731	0001805-32-9	Prediction	0.671344	1.70353	2.12674	-1.03219	-1.4554	**	**			**
732	0001806-26-4	Prediction	2.20549	1.72273	2.1654	0.482759	0.0400879
733	0001817-47-6	Prediction	1.82667	1.65801	1.27589	0.168656	0.550773
734	0001825-21-4	Prediction	3.3779	3.42526	3.73803	-0.0473643	-0.360131
735	0001825-31-6	Training	3.58333	3.06277	3.43508	0.520563	0.148249
736	0001827-79-6	Training	2.29	2.47674	2.25219	-0.186743	0.0378111
737	0001828-52-6	Training	1.98	2.45947	1.80035	-0.479474	0.179651
738	0001829-62-2	Training	1.28	0.528122	1.46635	0.751878	-0.186346
739	0001835-10-1	Training	0.77	-0.0637465	0.563223	0.833746	0.206777
740	0001836-75-5	Prediction	3.3375	2.17129	2.3292	1.16621	1.0083	**	**			**
741	0001836-77-7	Training	3.05705	2.45034	2.26172	0.606708	0.795322
742	0001837-65-7	Prediction	0.52	1.29692	1.35143	-0.776924	-0.831434
743	0001838-38-8	Training	2.18	1.95879	2.40801	0.221212	-0.22801
744	0001839-48-4	Prediction	2.48	3.20725	1.30158	-0.727254	1.17842		**
745	0001839-63-0	Training	3.34	2.40104	2.62097	0.938964	0.719028
746	0001840-57-9	Training	1.85	1.19513	1.13697	0.654871	0.713034
747	0001843-05-6	Prediction	1.9936	1.39849	1.18084	0.595107	0.812757
748	0001844-59-7	Training	1.81	1.17157	1.1032	0.638429	0.706803
749	0001846-78-9	Prediction	1.64	2.97966	3.12119	-1.33966	-1.48119	**	**			**
751	0001879-09-0	Training	2.375	2.11468	1.71001	0.260316	0.664994
752	0001892-57-5	Prediction	0.18	1.25354	0.978992	-1.07354	-0.798992	**
753	0001897-45-6	Training	2.25826	3.4317	3.38179	-1.17344	-1.12353			*	*		*
754	0001912-24-9	Prediction	0.667439	1.10585	1.56804	-0.438414	-0.900603
755	0001934-21-0	Training	-0.03	0.583495	0.84323	-0.613495	-0.87323
756	0001940-42-7	Prediction	2.225	1.67597	1.40745	0.549027	0.817551
757	0001945-53-5	Training	1.39954	1.98643	1.6777	-0.586889	-0.278162
758	0001987-50-4	Training	2.74833	1.66321	2.01742	1.08512	0.730913			*
759	0002008-58-4	Training	2.51	1.08813	1.25252	1.42187	1.25748			*	*		*
760	0002012-00-2	Prediction	1.10018	1.76202	2.08522	-0.661841	-0.985032
761	0002027-17-0	Prediction	3.25163	2.78741	3.0194	0.464213	0.232231
762	0002032-59-9	Training	0.724444	0.44767	0.726116	0.276775	-0.00167116
763	0002042-14-0	Prediction	1.34243	0.615218	1.04531	0.727216	0.297125
764	0002043-47-2	Prediction	1.57	1.6353	1.81914	-0.0652953	-0.249141
765	0002049-95-8	Training	3.18	2.57926	2.78858	0.600736	0.391416
766	0002050-67-1	Training	2.63	3.12245	3.54083	-0.492446	-0.910826
767	0002050-68-2	Training	2.79125	3.11372	3.53201	-0.322472	-0.740757
768	0002050-74-0	Training	3.79	3.06734	3.43989	0.722657	0.350113
769	0002050-75-1	Training	4.04	3.04422	3.41549	0.995783	0.624505
770	0002050-76-2	Prediction	1.34429	2.34653	2.38447	-1.00225	-1.04018	**	**			**
771	0002051-24-3	Training	3.99661	5.74516	4.52067	-1.74855	-0.524052			*
772	0002051-62-9	Training	1.69833	2.85249	2.96574	-1.15416	-1.26741			*	*		*
773	0002057-49-0	Training	1.83	2.44248	2.23637	-0.612477	-0.406369
774	0002058-94-8	Training	3.02444	1.8021	2.3268	1.22234	0.697648			*
775	0002078-54-8	Prediction	1.545	2.04799	1.7631	-0.502987	-0.218104
776	0002082-79-3	Prediction	1	2.09661	2.57104	-1.09661	-1.57104	**	**			**
777	0002104-64-5	Prediction	2.41609	1.83393	2.01312	0.582163	0.40297
778	0002104-96-3	Prediction	3.00362	2.4396	2.10068	0.56402	0.902945
779	0002122-19-2	Training	1	0.852659	1.07779	0.147341	-0.0777891
780	0002136-99-4	Training	4.9225	4.99191	4.48906	-0.06941	0.433439
781	0002144-53-8	Training	1.08	2.21606	2.27387	-1.13606	-1.19387			*	*		*
782	0002162-99-4	Prediction	2.725	1.80266	1.95273	0.922343	0.77227
783	0002173-57-1	Training	2.83085	2.5619	2.36078	0.268953	0.470072
784	0002198-77-8	Prediction	4.04	3.03478	3.40936	1.00522	0.63064	**
785	0002212-67-1	Training	1.54187	1.00886	0.938535	0.533014	0.603337
786	0002216-69-5	Training	2.32344	2.41077	2.2203	-0.0873303	0.103135
787	0002219-82-1	Prediction	1.915	1.98203	1.77763	-0.0670275	0.137369
788	0002234-13-1	Training	2.77793	5.1361	4.56851	-2.35818	-1.79059			*	*		*
789	0002243-62-1	Training	1.60255	1.80021	1.26547	-0.197663	0.33708
790	0002255-17-6	Training	0.889507	1.48003	1.68939	-0.590526	-0.79988
791	0002310-17-0	Training	2.38	1.33574	1.46686	1.04426	0.913138			*
792	0002371-42-8	Prediction	1.47667	2.63828	2.60134	-1.16161	-1.12467	**	**			**
793	0002381-21-7	Training	2.73	3.25688	3.40071	-0.526877	-0.670712
794	0002385-85-5	Prediction	3.30742	4.06239	3.90343	-0.754975	-0.596011
795	0002387-23-7	Training	0.095	1.16747	1.06909	-1.07247	-0.97409			*
796	0002403-88-5	Prediction	0.26	1.7907	1.57843	-1.5307	-1.31843	**	**			**
797	0002409-55-4	Training	2.29333	1.93111	1.72652	0.362226	0.566812
798	0002425-85-6	Prediction	0.445	1.24342	1.13537	-0.798422	-0.690368
799	0002436-93-3	Prediction	1.2925	2.45142	2.34866	-1.15892	-1.05616	**	**			**
800	0002437-79-8	Prediction	4.0775	3.70977	4.09613	0.367728	-0.0186299
801	0002440-02-0	Training	4.05	2.99714	3.05608	1.05286	0.99392			*
802	0002440-22-4	Prediction	2.5	1.76814	1.45067	0.731858	1.04933		**
803	0002446-69-7	Prediction	2.32	1.59871	2.07386	0.721292	0.246142
804	0002460-49-3	Prediction	2.008	1.62567	1.64158	0.382334	0.366418
805	0002463-84-5	Training	2.09609	1.58374	1.91381	0.512351	0.182283
806	0002465-27-2	Training	0.905988	1.76696	2.02439	-0.860974	-1.1184				*
807	0002498-66-0	Training	2.41187	2.32658	2.44155	0.0852879	-0.0296856
808	0002528-38-3	Training	2.48	1.62394	1.63414	0.856065	0.845862
809	0002531-84-2	Prediction	3.48	3.02354	3.22119	0.456459	0.258807
810	0002539-17-5	Training	2.51294	2.42273	2.31434	0.0902092	0.198603
811	0002539-26-6	Prediction	1.78	2.01886	2.41411	-0.238863	-0.634111
812	0002580-78-1	Training	0.595	0.935556	0.943408	-0.340556	-0.348408
813	0002581-34-2	Training	2.54113	0.627487	0.848427	1.91365	1.69271			*	*		*
814	0002611-82-7	Training	0.245	1.36537	0.980082	-1.12037	-0.735082			*
815	0002631-40-5	Prediction	1.28772	0.711969	0.978568	0.575746	0.309147
816	0002636-26-2	Prediction	0.771155	1.90013	2.10467	-1.12897	-1.33351	**	**			**
817	0002642-71-9	Training	2.27	1.27588	1.41184	0.994116	0.858157
818	0002655-14-3	Prediction	0.599788	0.617326	0.944694	-0.0175387	-0.344906
819	0002668-24-8	Prediction	2.18315	2.03287	2.29474	0.150286	-0.111592
820	0002668-47-5	Training	3.93608	2.79084	2.78925	1.14525	1.14683			*	*		*
821	0002691-41-0	Prediction	-0.0866667	1.20748	1.59722	-1.29415	-1.68388	**	**			**
822	0002695-37-6	Training	0.105	0.870213	0.355073	-0.765213	-0.250073
823	0002719-61-1	Prediction	2.41	2.77354	3.02275	-0.363538	-0.612746
824	0002795-39-3	Training	3.28	1.75517	2.90916	1.52483	0.370838			*
825	0002814-20-2	Prediction	0.355057	1.17991	1.39126	-0.824857	-1.0362		**
826	0002855-13-2	Training	0.005	2.09484	2.03131	-2.08984	-2.02631			*	*		*
827	0002885-00-9	Prediction	0.785	2.22677	1.86176	-1.44177	-1.07676	**	**			**
828	0002921-88-2	Training	2.78245	2.58553	2.30121	0.196918	0.481246
829	0003010-80-8	Training	3.95	3.57852	3.22143	0.371481	0.728567
830	0003048-65-5	Prediction	2.49	2.49355	2.75112	-0.0035499	-0.261117
831	0003074-71-3	Training	3.32	2.10064	2.28428	1.21936	1.03572			*	*		*
832	0003089-11-0	Prediction	0.24	0.216399	0.310005	0.0236013	-0.070005
833	0003194-55-6	Prediction	3.78	2.68012	2.80202	1.09988	0.97798	**
834	0003194-57-8	Prediction	3.655	2.35478	2.48093	1.30022	1.17407	**	**			**
835	0003209-22-1	Prediction	1.98628	1.82904	2.11639	0.157235	-0.130111
836	0003214-47-9	Training	0.2	1.08244	1.24431	-0.882441	-1.04431				*
837	0003229-00-3	Training	2.22456	1.96855	1.95442	0.256017	0.270141
838	0003268-87-9	Training	2.693	4.75901	2.48945	-2.06601	0.203551			*
839	0003279-07-0	Training	1.76	1.03916	1.10502	0.720843	0.654982
840	0003296-90-0	Training	0.312231	1.01601	0.595156	-0.703783	-0.282925
841	0003319-31-1	Training	0.25	1.76332	1.39804	-1.51332	-1.14804			*	*		*
842	0003380-34-5	Prediction	2.39023	2.4204	2.52853	-0.0301709	-0.138299
843	0003389-71-7	Training	2.78539	2.95729	3.03022	-0.171894	-0.24483
844	0003407-42-9	Training	2.76	2.67012	2.68256	0.089876	0.0774419
845	0003452-97-9	Prediction	0.855	1.43676	1.96893	-0.58176	-1.11393		**
846	0003481-20-7	Prediction	2.775	2.57574	2.83947	0.199256	-0.0644713
847	0003520-72-7	Prediction	0.56	1.53808	1.18452	-0.97808	-0.624521
848	0003531-19-9	Prediction	1.04	0.88237	0.950071	0.15763	0.0899294
849	0003576-88-3	Prediction	-1	0.128879	0.420318	-1.12888	-1.42032	**	**			**
850	0003586-14-9	Training	3.27	2.45177	2.25458	0.818226	1.01542				*
851	0003618-60-8	Training	0.649903	1.24072	0.966434	-0.590818	-0.31653
852	0003622-84-2	Prediction	0.54	1.14922	1.0327	-0.60922	-0.492701
853	0003648-21-3	Prediction	1.36429	1.70887	1.78136	-0.344581	-0.417077
854	0003674-75-7	Training	2.15489	3.07266	3.2428	-0.917764	-1.0879				*
855	0003761-41-9	Training	0.432588	1.40888	1.60542	-0.976296	-1.17283				*
856	0003761-42-0	Prediction	1.26954	1.48949	1.85577	-0.219949	-0.586234
857	0003766-81-2	Training	1.27364	0.786049	0.81566	0.487588	0.457976
858	0003772-94-9	Training	2.325	3.10706	2.18387	-0.782056	0.141134
859	0003792-59-4	Prediction	4.16	2.978	2.6483	1.182	1.5117	**	**			**
860	0003811-49-2	Prediction	1.75023	2.10779	2.22508	-0.357554	-0.474849
861	0003846-71-7	Training	3.65218	2.48667	2.77061	1.16551	0.881566			*
862	0003848-51-9	Training	1.86	1.40306	0.907226	0.456938	0.952774
863	0003864-99-1	Prediction	3.23345	2.71236	2.94304	0.521094	0.290414
864	0003871-99-6	Training	2.016	1.4834	2.42943	0.532605	-0.413431
865	0003891-29-0	Training	1.455	1.20267	0.915121	0.252333	0.539879
866	0003965-55-7	Prediction	-0.02	0.632409	0.975724	-0.652409	-0.995724
867	0004051-66-5	Prediction	2.30833	1.67023	1.53443	0.638107	0.773903
868	0004101-68-2	Prediction	1.58261	2.00958	2.18808	-0.426972	-0.605476
869	0004130-42-1	Training	3.5643	2.56523	2.64722	0.999075	0.917083
870	0004162-45-2	Training	2.0475	1.7787	1.28459	0.268796	0.762913
871	0004175-54-6	Prediction	3.12	2.77633	3.01433	0.343669	0.10567
872	0004286-23-1	Prediction	1.28	1.40813	1.91871	-0.12813	-0.63871
873	0004292-75-5	Training	3.29	2.4383	2.66148	0.851701	0.628519
875	0004531-49-1	Prediction	0.49	1.05767	0.678161	-0.567671	-0.188161
876	0004620-70-6	Training	0.295	0.758639	0.565822	-0.463639	-0.270822
877	0004637-24-5	Training	-0.12	1.0616	0.699884	-1.1816	-0.819884			*
878	0004821-19-6	Training	3.33093	2.63253	2.68649	0.698403	0.644438
879	0004883-72-1	Training	0.947554	0.55604	0.520125	0.391514	0.427429
880	0004901-51-3	Prediction	1.46076	2.46549	2.72725	-1.00472	-1.26648	**	**			**
881	0004904-61-4	Training	3.61586	2.30233	2.49332	1.31353	1.12254			*	*		*
882	0004979-32-2	Training	2.45333	2.40983	2.29914	0.0435077	0.154198
883	0005102-83-0	Training	0.49	1.53396	0.932451	-1.04396	-0.442451			*
884	0005103-71-9	Training	3.3863	3.21816	3.24962	0.16814	0.13668
885	0005124-25-4	Training	1.55001	1.26376	0.920374	0.286255	0.62964
886	0005332-73-0	Prediction	0.02	0.255281	0.232701	-0.235281	-0.212701
887	0005409-83-6	Training	3.66	3.07296	2.92851	0.587038	0.731493
888	0005428-54-6	Training	1.28598	0.650628	0.823607	0.635356	0.462377
889	0005468-75-7	Prediction	0.32	1.46903	1.07673	-1.14903	-0.756732	**
890	0005510-99-6	Training	2.82045	2.2265	1.92829	0.593946	0.892153
891	0005566-34-7	Prediction	2.21815	3.2255	3.2708	-1.00736	-1.05266	**	**			**
892	0005567-15-7	Training	0.49	1.19998	-0.125407	-0.70998	0.615407
894	0005707-44-8	Training	2.98	2.77334	2.97136	0.206657	0.00864487
895	0005786-21-0	Training	2.915	1.98314	2.21696	0.931865	0.698041
896	0005809-23-4	Prediction	0.195	0.859071	1.0986	-0.664071	-0.903596
897	0005835-26-7	Training	1.63963	2.01716	1.70623	-0.37753	-0.0665972
898	0005902-51-2	Prediction	0.78	1.17442	1.4047	-0.394423	-0.624703
899	0005915-41-3	Training	0.8225	1.25705	1.64472	-0.434553	-0.822222
900	0006034-54-4	Training	0.105	0.589558	0.649392	-0.484558	-0.544392
901	0006099-57-6	Training	0.71	1.16416	1.03553	-0.454162	-0.325531
902	0006130-75-2	Prediction	2.78837	2.70753	2.7545	0.0808447	0.0338728
903	0006165-51-1	Prediction	2.9325	2.94271	3.15287	-0.0102124	-0.220367
904	0006337-43-5	Training	1.28	1.24897	0.977611	0.0310324	0.302389
905	0006358-37-8	Prediction	0.49	1.48554	1.14958	-0.995545	-0.659576
906	0006358-85-6	Training	0.576667	1.38914	0.822019	-0.812469	-0.245352
907	0006362-80-7	Prediction	3.58	3.03001	3.22406	0.549985	0.355939
908	0006425-39-4	Prediction	0.48	1.37944	0.991132	-0.899445	-0.511132
909	0006459-94-5	Prediction	1.84612	1.48053	1.31013	0.36559	0.535985
910	0006639-30-1	Prediction	3.50526	2.95738	3.53924	0.547884	-0.0339755
911	0006674-22-2	Prediction	0.08	1.95832	1.84782	-1.87832	-1.76782	**	**			**
913	0006731-36-8	Training	4.00702	2.71221	2.56609	1.29481	1.44093			*	*		*
914	0006842-15-5	Training	3.40622	2.12588	2.29106	1.28034	1.11516			*	*		*
915	0006864-37-5	Training	1.28	2.37944	2.44322	-1.09944	-1.16322			*	*		*
916	0006936-40-9	Prediction	3.69	3.0664	3.27225	0.623605	0.417747
917	0007012-37-5	Training	4.43	3.40866	4.01089	1.02134	0.419114			*
918	0007085-19-0	Training	0.48	0.835641	0.816283	-0.355641	-0.336283
919	0007267-11-0	Prediction	1.09781	1.48127	1.38877	-0.383464	-0.290966
920	0007287-19-6	Prediction	1.93	0.929112	1.65151	1.00089	0.278487	**
921	0007299-99-2	Prediction	0.92	1.55576	1.19204	-0.635757	-0.272041
922	0007379-51-3	Training	1.16	1.38032	1.03114	-0.220318	0.12886
923	0007529-22-8	Training	1	0.899264	0.842728	0.100736	0.157272
924	0007580-85-0	Training	-0.22	0.752516	0.593585	-0.972516	-0.813585
925	0007745-89-3	Prediction	1.88	1.63008	1.42833	0.249922	0.451668
926	0007756-94-7	Prediction	3.40643	2.65418	2.92769	0.752246	0.478739
927	0008001-35-2	Prediction	4.05923	3.18065	3.2311	0.878578	0.828126
928	0010075-50-0	Prediction	2.98	1.61413	1.29993	1.36587	1.68007	**	**			**
929	0010081-67-1	Training	1.925	3.00129	2.912	-1.07629	-0.987005			*
930	0010113-28-7	Training	2.76	1.38485	1.45914	1.37515	1.30086			*	*		*
931	0010161-33-8	Training	1.11	2.10007	2.25641	-0.990073	-1.14641				*
932	0010315-98-7	Training	1.36534	1.69054	1.42228	-0.325196	-0.0569353
933	0010319-14-9	Training	0.992988	1.46955	1.08641	-0.476567	-0.0934252
934	0010453-86-8	Training	3.55	2.09033	2.14579	1.45967	1.40421			*	*		*
935	0010461-98-0	Training	2.5	2.64095	2.4297	-0.140947	0.0703031
936	0010496-18-1	Training	2	2.44271	2.19082	-0.442707	-0.19082
937	0010541-83-0	Prediction	1.14241	0.320395	0.869069	0.822012	0.273339
938	0010605-21-7	Training	0.664545	0.189518	0.653658	0.475027	0.0108874
939	0011096-82-5	Prediction	4.51833	4.6585	4.50681	-0.140167	0.0115215
940	0012002-48-1	Prediction	2.94659	2.82939	3.42429	0.117203	-0.477696
941	0012122-67-7	Training	2.21	0.494845	1.11822	1.71515	1.09178			*	*		*
942	0012217-77-5	Training	2.31855	1.2366	0.945816	1.08195	1.37273			*	*		*
943	0012674-11-2	Training	4.02741	3.40476	4.00811	0.622652	0.0192953
944	0013029-08-8	Prediction	2.212	3.14806	3.55876	-0.936063	-1.34676		**
945	0013049-38-2	Training	3.76	2.90484	3.0948	0.855164	0.665199
946	0013071-79-9	Training	2.14167	1.88981	1.92655	0.251857	0.215113
947	0013116-53-5	Prediction	1.77	1.65761	1.7244	0.112386	0.0455923
948	0013150-81-7	Prediction	3.18	2.32192	2.60633	0.858079	0.573673
949	0013194-48-4	Training	0.896	1.18916	1.13513	-0.29316	-0.239131
950	0013286-32-3	Training	1.03667	1.48019	1.57144	-0.443521	-0.534775
951	0013358-11-7	Prediction	2.78305	2.17153	2.22114	0.61152	0.561912
952	0013464-24-9	Training	1.59	2.12895	1.71297	-0.538948	-0.122969
953	0013475-82-6	Training	3.1269	2.63534	2.8748	0.49156	0.252098
954	0013540-50-6	Prediction	3.23702	2.84356	3.06828	0.393463	0.168743
955	0013560-89-9	Training	1.57	3.6681	3.61541	-2.0981	-2.04541			*	*		*
957	0013674-84-5	Training	0.519273	1.4165	1.50898	-0.897223	-0.989705
958	0013674-87-8	Training	1.22036	1.43434	1.53091	-0.213983	-0.310559
959	0013936-21-5	Training	2.96527	2.24652	2.35605	0.718749	0.609223
960	0013987-01-4	Prediction	3.32	2.10064	2.36923	1.21936	0.950775	**
961	0014233-37-5	Training	3.85	1.55968	1.8715	2.29032	1.9785			*	*		*
962	0014802-03-0	Prediction	0.905	1.59018	0.408001	-0.685182	0.496999
963	0014816-18-3	Prediction	2.95158	2.09525	2.29626	0.856327	0.655313
964	0015046-75-0	Training	-0.17	0.842527	0.255089	-1.01253	-0.425089			*
965	0015087-24-8	Training	2.44857	2.43023	1.87714	0.0183423	0.571435
966	0015258-73-8	Prediction	1.21915	1.76943	2.0553	-0.550273	-0.836144
967	0015307-86-5	Prediction	1.92273	1.38324	1.31527	0.539482	0.607461
968	0015782-05-5	Training	0.3	1.28104	1.00962	-0.981037	-0.709617
969	0015862-07-4	Training	3.99077	3.42027	4.01909	0.570499	-0.0283198
970	0015883-57-5	Training	1.17806	1.19573	0.921272	-0.0176682	0.256792
971	0015968-05-5	Training	4.0575	3.73735	4.16144	0.320154	-0.103945
972	0015972-60-8	Training	1.39014	1.44605	1.47438	-0.0559095	-0.0842413
974	0016219-75-3	Prediction	2.75513	2.5858	2.83982	0.169333	-0.0846947
976	0016400-50-3	Prediction	1.27667	2.74768	2.87054	-1.47101	-1.59388	**	**			**
977	0016517-11-6	Training	2.67667	2.29192	2.72355	0.384743	-0.0468821
978	0016605-91-7	Training	3.92231	3.14385	3.56231	0.778461	0.359999
979	0016606-02-3	Training	3.98727	3.40866	4.01089	0.578611	-0.0236128
980	0016611-67-9	Prediction	1.89	2.38617	2.96762	-0.496167	-1.07762		**
981	0016766-29-3	Prediction	3.5	2.67282	2.76604	0.827184	0.733963
982	0016766-31-7	Training	1.74	1.65885	1.45113	0.0811524	0.288872
983	0017095-24-8	Training	0.64	0.657095	0.8383	-0.0170947	-0.1983
984	0017109-49-8	Training	2.03392	1.64809	1.76188	0.38583	0.272033
985	0017270-01-8	Prediction	0.93	2.21465	2.33906	-1.28465	-1.40906	**	**			**
986	0017302-11-3	Training	3.32	2.20369	2.4049	1.11631	0.915101			*
987	0017348-59-3	Prediction	0.76	1.87209	1.67261	-1.11209	-0.912608	**
988	0017700-09-3	Training	2.16035	2.17277	2.20887	-0.0124144	-0.0485202
989	0017790-61-3	Training	3.04	3.07099	3.21719	-0.0309917	-0.177194
990	0017804-35-2	Training	1.43	0.107837	0.653437	1.32216	0.776563			*
991	0018181-70-9	Training	2.60361	2.4396	1.99481	0.164009	0.608807
992	0018259-05-7	Training	4.85	4.03886	4.45803	0.811136	0.39197
993	0018375-66-1	Training	2.94	0.84432	0.891524	2.09568	2.04848			*	*		*
994	0018708-70-8	Prediction	2.52546	2.17358	2.31289	0.351882	0.212565
995	0018854-01-8	Training	2.21808	2.17943	2.34975	0.038643	-0.13167
996	0019408-74-3	Prediction	3.92	4.02558	3.49773	-0.105575	0.42227
997	0019666-30-9	Training	2.34393	1.915	1.95943	0.42893	0.384502
998	0019715-19-6	Training	0.985	1.35202	1.11324	-0.367019	-0.128244
999	0019780-74-6	Prediction	3.43	2.20314	2.47445	1.22686	0.955547	**
1000	0019956-76-4	Training	2.65	2.42511	1.98283	0.224893	0.667165
1001	0020020-02-4	Training	2.96851	3.68114	4.12915	-0.712629	-1.16064				*
1002	0020076-86-2	Prediction	1.00359	0.768022	1.04865	0.235568	-0.0450558
1003	0020298-69-5	Prediction	2.28	1.80388	1.86015	0.476123	0.419852
1004	0020367-35-5	Training	2.925	2.19233	1.99259	0.732668	0.932414
1005	0020651-71-2	Training	0.88	0.804978	1.30087	0.075022	-0.420868
1006	0020668-33-1	Training	1.1275	2.44209	2.25206	-1.31459	-1.12456			*	*		*
1007	0020749-68-2	Training	1.51	2.86778	2.36819	-1.35778	-0.858189			*
1008	0021087-64-9	Training	1.76	0.456227	0.714188	1.30377	1.04581			*	*		*
1009	0021267-72-1	Training	0.95	0.783209	0.766988	0.166791	0.183012
1010	0021348-16-3	Training	0.662228	-0.072975	0.405135	0.735203	0.257093
1011	0021564-17-0	Training	1.90403	1.4941	1.51448	0.409929	0.389549
1012	0021609-90-5	Training	3.26	2.90051	2.44084	0.359489	0.819156
1013	0021850-44-2	Prediction	1.80667	2.77899	2.89215	-0.972322	-1.08548		**
1014	0022094-93-5	Training	0.49	2.07368	1.26157	-1.58368	-0.771571			*
1015	0022259-30-9	Training	0	0.152718	0.628834	-0.152718	-0.628834
1016	0022311-25-7	Training	3.18	2.28293	2.32541	0.897066	0.854595
1017	0022907-72-8	Training	3.5	2.64296	2.875	0.857036	0.624999
1018	0023135-22-0	Prediction	0.3	-0.342608	0.698531	0.642608	-0.398531
1019	0023184-66-9	Training	1.55632	1.55528	1.5429	0.00103122	0.013416
1020	0024019-05-4	Training	2.26843	1.89515	1.37172	0.373286	0.896708
1021	0024423-11-8	Training	3.63	3.16625	3.30631	0.463751	0.323686
1022	0024800-44-0	Training	0.23	0.873411	0.58393	-0.643411	-0.35393
1023	0025013-16-5	Training	1.29	1.72087	1.29469	-0.430874	-0.00469089
1024	0025154-52-3	Training	1.51113	1.90236	1.8002	-0.391226	-0.28907
1025	0025154-54-5	Training	1.35293	1.40909	1.13325	-0.056165	0.219678
1026	0025155-23-1	Prediction	2.655	2.21103	2.41456	0.443973	0.240445
1027	0025155-30-0	Training	1.13071	1.45704	1.13035	-0.326327	0.000364494
1028	0025167-81-1	Training	1.99951	1.60824	1.7851	0.391274	0.214407
1029	0025265-76-3	Training	0.49	1.15109	0.778906	-0.661091	-0.288906
1030	0025291-17-2	Prediction	2.58	3.18513	3.26004	-0.605134	-0.680045
1031	0025311-71-1	Prediction	1.86784	1.30006	2.21882	0.567784	-0.350977
1032	0025321-09-9	Training	3.31156	2.61602	2.82751	0.69554	0.484041
1033	0025323-68-6	Training	4.02341	3.42792	4.02446	0.595494	-0.00104998
1034	0025339-17-7	Training	2.51	1.20757	1.79467	1.30243	0.715333			*
1035	0025376-45-8	Training	1.41	1.35075	0.939968	0.0592527	0.470032
1036	0025394-13-2	Prediction	0.653333	1.19532	1.07469	-0.54199	-0.421358
1037	0025429-29-2	Prediction	4.41644	4.02321	4.38117	0.393237	0.0352764
1038	0025485-88-5	Training	2.88	0.984894	0.894082	1.89511	1.98592			*	*		*
1039	0025637-99-4	Prediction	3.46333	2.68012	2.80202	0.783218	0.661313
1040	0025638-17-9	Training	-0.356	1.5531	0.67153	-1.9091	-1.02753			*	*		*
1041	0025640-71-5	Training	2.08333	3.1204	2.89034	-1.03707	-0.807008			*
1042	0025640-78-2	Training	3.84	2.87633	3.0681	0.963674	0.771895
1043	0025747-06-2	Training	0.58	1.24072	0.966434	-0.660721	-0.386434
1044	0025791-96-2	Training	0.595	0.416762	0.830299	0.178238	-0.235299
1045	0025954-13-6	Prediction	0	0.0744848	0.633385	-0.0744848	-0.633385
1046	0025973-55-1	Training	3.205	2.6061	2.65943	0.598898	0.545571
1047	0026076-28-8	Training	1.67667	2.21059	2.55012	-0.533922	-0.873454
1048	0026087-47-8	Prediction	1.80269	1.63579	1.86315	0.166896	-0.0604642
1049	0026140-60-3	Training	1.99048	3.04794	3.22459	-1.05746	-1.23411			*	*		*
1050	0026234-46-8	Training	1.08	1.90269	2.03259	-0.822693	-0.952594
1051	0026259-45-0	Training	1.2	0.791792	1.04896	0.408208	0.151045
1052	0026306-61-6	Training	2.586	2.40375	2.48997	0.182246	0.0960275
1053	0026389-78-6	Training	1.62	1.47606	1.77034	0.143937	-0.150336
1054	0026399-36-0	Prediction	1.59	1.74855	2.22884	-0.158547	-0.638843
1055	0026444-49-5	Prediction	2.56806	1.98598	2.24008	0.582076	0.327975
1056	0026530-20-1	Training	2.51583	1.34057	1.37343	1.17525	1.1424			*	*		*
1057	0026545-58-4	Prediction	0.39254	1.93389	1.6816	-1.54135	-1.28906	**	**			**
1058	0026601-64-9	Training	3.93375	4.34809	4.67919	-0.414347	-0.745441
1059	0026603-23-6	Training	0.846667	2.79526	2.25609	-1.94859	-1.40943			*	*		*
1060	0026630-87-5	Prediction	2.274	0.49104	1.14865	1.78296	1.12535	**	**			**
1061	0026761-40-0	Prediction	1.08	1.89378	1.93502	-0.81378	-0.855021
1062	0026780-96-1	Training	2.94333	2.31194	2.20014	0.631397	0.743189
1063	0026787-65-5	Training	1.65058	1.21325	1.04359	0.437326	0.606987
1064	0026898-17-9	Prediction	4.02097	3.15208	3.31931	0.868893	0.701654
1065	0026914-33-0	Prediction	3.98717	3.72368	4.1035	0.263489	-0.116333
1066	0026967-76-0	Prediction	2.13286	2.27902	2.41956	-0.146159	-0.286708
1067	0027193-29-9	Training	3.58	2.84215	3.06109	0.737855	0.518911
1068	0027193-86-8	Training	2.87	1.97151	2.08798	0.898486	0.782016
1070	0027344-41-8	Training	0.46	1.95988	1.62708	-1.49988	-1.16708			*	*		*
1071	0027458-92-0	Training	2.73	1.45905	2.00523	1.27095	0.724774			*
1072	0027676-62-6	Training	0.27	1.52548	1.3789	-1.25548	-1.1089			*	*		*
1073	0028076-73-5	Training	4.14	3.42179	3.50488	0.718215	0.635118
1074	0028106-30-1	Training	2.70324	2.39954	2.59243	0.303705	0.110815
1075	0028249-77-6	Training	2.17334	1.43021	1.49668	0.743134	0.676658
1076	0028299-29-8	Training	0.04	1.03427	0.979418	-0.994272	-0.939418
1077	0028299-41-4	Prediction	2.52	2.56006	2.44301	-0.040064	0.076986
1078	0028519-02-0	Prediction	0.835	1.5941	1.3092	-0.759099	-0.474203
1079	0028575-17-9	Training	3.42449	2.89704	3.08771	0.527451	0.336787
1080	0028680-44-6	Training	3.81	2.91186	2.98703	0.898142	0.822969
1081	0028680-45-7	Prediction	3.58307	3.02194	3.10685	0.561135	0.476225
1082	0028984-87-4	Prediction	3.14	3.06483	2.87356	0.0751708	0.266436
1083	0029082-74-4	Prediction	3.28563	4.19376	4.51318	-0.908136	-1.22755		**
1084	0029091-05-2	Prediction	2.025	0.721141	0.963081	1.30386	1.06192	**	**			**
1085	0029253-36-9	Training	2.86459	2.80952	3.00603	0.0550723	-0.141435
1086	0029446-15-9	Training	2.88	2.8356	2.65632	0.0443959	0.223684
1087	0029598-76-3	Training	1.385	1.01216	0.417254	0.372838	0.967746
1088	0029761-21-5	Training	2.46872	2.00999	2.12147	0.458727	0.347247
1089	0030171-80-3	Prediction	0.61	2.09267	2.22594	-1.48267	-1.61594	**	**			**
1090	0030560-19-1	Training	-1.3475	0.26066	0.247741	-1.60816	-1.59524			*	*		*
1091	0030746-58-8	Prediction	3.17	3.41777	3.63194	-0.247767	-0.461939
1092	0031508-00-6	Training	4.585	4.00401	4.44675	0.580992	0.138246
1093	0031604-28-1	Training	4.4	3.67017	4.12273	0.72983	0.277273
1094	0031775-20-9	Prediction	0.49	1.10722	0.756586	-0.617218	-0.266586
1095	0032388-55-9	Training	2.9	2.56743	2.23321	0.33257	0.666788
1096	0032588-76-4	Training	0.26	1.56379	1.56412	-1.30379	-1.30412			*	*		*
1097	0032598-10-0	Training	4.635	3.70273	4.14171	0.932272	0.493293
1098	0032598-11-1	Prediction	4.462	3.70273	4.09237	0.759272	0.369626
1099	0032598-13-3	Training	2.93208	3.69562	4.13761	-0.763544	-1.20553				*
1100	0032598-14-4	Training	4.565	4.01046	4.44887	0.554541	0.116134
1101	0032669-06-0	Training	2.55437	2.52872	2.38992	0.025651	0.164456
1102	0032690-93-0	Prediction	4.6	3.70273	4.09237	0.897272	0.507626
1103	0032774-16-6	Prediction	5.22	4.31304	4.57639	0.906963	0.643608
1104	0032861-85-1	Training	3.0185	2.0643	2.20659	0.954197	0.811906
1105	0033025-41-1	Training	4.58	3.70977	4.14576	0.870228	0.434244
1106	0033027-68-8	Training	1.71	2.33966	2.19439	-0.629662	-0.484387
1107	0033089-61-1	Training	3.26	2.31127	2.05572	0.948731	1.20428				*
1108	0033245-39-5	Prediction	1.51	1.55153	2.02706	-0.0415326	-0.517058
1109	0033284-50-3	Prediction	3.55	3.13536	3.54698	0.414644	0.00302083
1110	0033284-52-5	Training	3.01692	3.69562	4.13761	-0.678699	-1.12068				*
1111	0033284-53-6	Prediction	4.39	3.72368	4.1035	0.666323	0.286501
1113	0033423-92-6	Training	3.166	3.40186	3.6353	-0.235858	-0.469303
1114	0033576-92-0	Training	1.89	1.95341	1.9427	-0.0634088	-0.0526981
1115	0033629-47-9	Training	2.15	1.43332	1.35972	0.716676	0.790278
1116	0033704-61-9	Training	2.02	2.34204	1.87864	-0.322037	0.141364
1117	0033857-26-0	Prediction	2.37	2.8293	2.70738	-0.459305	-0.337379
1118	0033979-03-2	Training	3.03571	4.33658	4.67406	-1.30086	-1.63835			*	*		*
1119	0034335-10-9	Prediction	1.42	0.779195	0.434318	0.640805	0.985682
1120	0034364-42-6	Training	3.45	2.29599	2.42101	1.15401	1.02899			*	*		*
1121	0034643-46-4	Prediction	2.55789	2.65478	2.35372	-0.0968863	0.20417
1122	0034883-39-1	Training	4.0696	3.13536	3.55381	0.934249	0.515794
1123	0034883-41-5	Training	3.34918	3.12677	3.54519	0.222409	-0.196005
1124	0034883-43-7	Training	3.69	3.13108	3.54951	0.558924	0.140485
1125	0035065-27-1	Training	4.34188	4.31899	4.66615	0.0228927	-0.324268
1126	0035065-28-2	Training	5.435	4.32489	4.66882	1.11011	0.766182			*
1127	0035065-29-3	Training	3.53333	4.645	4.58169	-1.11166	-1.04836			*	*		*
1128	0035367-38-5	Prediction	1.89778	0.840387	0.996847	1.05739	0.900931	**
1129	0035554-44-0	Training	1.805	2.45762	2.11834	-0.652617	-0.313345
1130	0035693-92-6	Prediction	3.93	3.43171	3.98607	0.498289	-0.056068
1131	0035693-99-3	Training	3.32483	3.70977	4.14576	-0.384942	-0.820925
1132	0035694-06-5	Prediction	3.995	4.32783	4.58261	-0.33283	-0.587606
1133	0035694-08-7	Training	5.052	4.9819	4.48424	0.0701024	0.567759
1134	0035822-46-9	Training	3.5225	4.36845	3.0219	-0.845948	0.500602
1135	0035860-37-8	Prediction	3.52855	3.17214	3.34035	0.356406	0.188196
1136	0036065-30-2	Prediction	4.33912	2.34982	2.37509	1.9893	1.96403	**	**			**
1137	0036335-67-8	Training	2.05555	1.48111	2.5035	0.57444	-0.447952
1138	0036355-01-8	Training	3.48549	2.91466	2.98858	0.570825	0.49691
1139	0036437-37-3	Training	4.075	2.43552	2.77035	1.63948	1.30465			*	*		*
1140	0036483-60-0	Prediction	3.145	2.61622	2.62627	0.528778	0.518733
1141	0036559-22-5	Training	4.535	3.71675	4.14975	0.818246	0.385247
1142	0036653-82-4	Prediction	3.04	1.60615	2.21563	1.43385	0.824373	**
1143	0036734-19-7	Prediction	2.01923	0.944975	0.984457	1.07426	1.03477	**	**			**
1144	0037372-50-2	Training	1.3527	1.12638	1.01867	0.22632	0.334036
1145	0037680-65-2	Training	3.2992	3.4241	4.02178	-0.124897	-0.722579
1146	0037680-66-3	Training	4.37	3.4241	4.02178	0.945899	0.348217
1147	0037680-73-2	Prediction	3.80692	4.01046	4.37733	-0.203536	-0.570404
1148	0037853-59-1	Training	1.29313	2.42555	2.52632	-1.13242	-1.23319			*	*		*
1149	0038379-99-6	Training	4.78	4.02321	4.45301	0.756792	0.326994
1150	0038380-01-7	Training	4.86	4.01046	4.44887	0.849541	0.411134
1151	0038380-02-8	Training	4.86833	4.01686	4.45095	0.851475	0.417384
1152	0038380-03-9	Training	5.035	4.01686	4.45095	1.01814	0.58405			*
1153	0038380-04-0	Training	5.08	4.33076	4.67146	0.749244	0.408543
1154	0038380-05-1	Prediction	4.88	4.33658	4.58625	0.543423	0.293754
1155	0038380-07-3	Training	4.84667	4.33076	4.67146	0.51591	0.17521
1156	0038380-08-4	Training	5.88	4.32195	4.66749	1.55805	1.21251			*	*		*
1157	0038411-22-2	Prediction	4.7625	4.34236	4.58864	0.420144	0.173863
1158	0038411-25-5	Prediction	5.705	4.65582	4.50557	1.04918	1.19943	**	**			**
1159	0038444-77-8	Training	5.08	3.4241	4.02178	1.6559	1.05822			*	*		*
1160	0038444-85-8	Training	4.47	3.41642	4.01637	1.05358	0.453627			*
1161	0038444-86-9	Prediction	4.36	3.41642	3.9761	0.943581	0.383899
1162	0038444-90-5	Prediction	4.58	3.40083	3.96585	1.17917	0.614155	**
1163	0038444-93-8	Training	3.16855	3.72368	4.1537	-0.555125	-0.985147
1164	0038638-05-0	Prediction	2.84	2.18524	2.36646	0.654758	0.473535
1165	0038640-62-9	Training	3.41188	3.02017	3.19971	0.391705	0.212167
1166	0038964-22-6	Prediction	2.82	2.8293	2.70738	-0.00930481	0.112621
1167	0039001-02-0	Training	3.092	5.01736	2.89794	-1.92536	0.194063			*
1168	0039227-28-6	Prediction	3.4425	4.02558	3.49773	-0.583075	-0.0552302
1169	0039227-58-2	Training	2.75167	3.12364	3.29026	-0.371978	-0.538589
1170	0039227-61-7	Prediction	3.1075	3.71163	3.82883	-0.604134	-0.72133
1171	0039485-83-1	Training	3.4	4.02004	4.45198	-0.620039	-1.05198				*
1172	0039569-21-6	Training	3.98	2.61912	2.42433	1.36088	1.55567			*	*		*
1173	0039801-14-4	Prediction	4.55	3.89152	3.76624	0.658485	0.783761
1174	0040036-79-1	Prediction	2.876	0.677305	0.958168	2.19869	1.91783		**
1175	0040186-71-8	Training	5.29	4.99191	4.48906	0.29809	0.800939
1176	0040186-72-9	Prediction	5.07	5.34068	4.3903	-0.270684	0.679699
1177	0040321-76-4	Training	4.38	3.70168	3.84957	0.678316	0.530426
1178	0040690-89-9	Prediction	0.962138	1.46703	1.56021	-0.50489	-0.59807
1179	0040766-31-2	Training	3.44	2.95008	3.13558	0.489922	0.304422
1180	0041122-70-7	Training	3.5874	2.84516	2.62421	0.742234	0.96319
1181	0041198-08-7	Prediction	1.96	1.69416	2.03912	0.265835	-0.0791196
1182	0041464-39-5	Training	4.2425	3.71675	4.14975	0.525746	0.0927474
1183	0041464-40-8	Training	4.33	3.70977	4.14576	0.620228	0.184244
1184	0041464-42-0	Prediction	4.85	3.70273	4.09237	1.14727	0.757626	**
1185	0041464-51-1	Training	4.6975	4.01686	4.45095	0.680641	0.24655
1186	0041611-76-1	Training	0.54	1.93436	2.24075	-1.39436	-1.70075			*	*		*
1187	0042240-73-3	Training	3.23125	3.00478	3.11801	0.226461	0.113235
1188	0042615-29-2	Training	2.31067	1.51199	1.17763	0.798673	1.13304				*
1189	0046382-54-1	Prediction	1.72	1.63116	1.69187	0.0888363	0.0281298
1190	0047377-16-2	Training	0.52	1.53104	1.26154	-1.01104	-0.741537			*
1191	0049562-28-9	Training	1.72538	2.02306	2.06131	-0.297673	-0.335924
1192	0050375-10-5	Training	2.52519	2.72478	2.72177	-0.19958	-0.196575
1193	0050512-35-1	Training	2.03654	0.987286	0.870268	1.04925	1.16627			*	*		*
1194	0050853-70-8	Prediction	0.95	1.03445	1.12695	-0.0844453	-0.176949
1195	0050876-32-9	Training	3.65	2.60243	2.83393	1.04757	0.81607			*
1196	0050925-42-3	Training	0.5	0.317879	0.725332	0.182121	-0.225332
1197	0051207-31-9	Prediction	3.56484	3.63442	3.62332	-0.0695806	-0.0584833
1198	0051630-58-1	Training	2.78727	2.12222	2.13905	0.665046	0.648217
1199	0051892-26-3	Prediction	3.97	2.8513	2.71483	1.1187	1.25517	**	**			**
1200	0051908-16-8	Training	5.31	4.32195	4.66749	0.988055	0.642513
1201	0052184-14-2	Training	3.685	1.73644	1.82212	1.94856	1.86288			*	*		*
1202	0052186-00-2	Training	0.025	1.39502	1.4066	-1.37002	-1.3816			*	*		*
1203	0052207-48-4	Prediction	-0.123333	0.527555	0.793583	-0.650888	-0.916917
1204	0052303-69-2	Training	0.0802022	1.04211	0.941246	-0.961912	-0.861044
1205	0052322-80-2	Training	3.24365	3.13614	3.28877	0.107509	-0.0451151
1206	0052591-27-2	Training	1.72	1.88501	1.85298	-0.165013	-0.13298
1207	0052663-58-8	Training	5.19	3.71675	4.14975	1.47325	1.04025			*	*		*
1208	0052663-60-2	Prediction	5.15	4.02951	4.38305	1.12049	0.766949	**
1209	0052663-61-3	Training	5.27	4.01367	4.44991	1.25633	0.820089			*
1210	0052663-63-5	Training	5.15	4.33367	4.67276	0.816328	0.477235
1211	0052663-69-1	Prediction	5.3125	4.65043	4.50307	0.662074	0.809426
1212	0052663-70-4	Training	5.26	4.65582	4.5871	0.604183	0.672896
1213	0052663-78-2	Training	5.35667	4.99191	4.48906	0.364757	0.867606
1214	0052712-04-6	Training	5.3225	4.32783	4.67014	0.99467	0.652358
1215	0052712-05-7	Prediction	5.27667	4.6585	4.50681	0.618167	0.769855
1216	0052744-13-5	Training	5.54	4.33367	4.67276	1.20633	0.867235			*
1217	0052789-62-5	Prediction	1.39143	1.10519	1.02661	0.286241	0.364815
1218	0052918-63-5	Training	2.59403	1.87839	2.02814	0.715639	0.565895
1219	0053469-21-9	Prediction	4.3025	3.71675	4.09984	0.585746	0.202662
1220	0053555-64-9	Training	4.53	3.65904	4.11617	0.870956	0.413826
1221	0053826-12-3	Training	1.08	1.30835	1.63329	-0.228352	-0.553286
1222	0054135-80-7	Prediction	3.2997	2.71907	2.76829	0.580636	0.531414
1223	0054135-81-8	Prediction	3.07703	2.10654	2.66613	0.970484	0.410902
1224	0054135-82-9	Training	3.09	2.70753	2.69958	0.38247	0.390421
1225	0054352-93-1	Training	3.81	2.82004	3.0404	0.989964	0.769604
1226	0054910-89-3	Prediction	2.07308	2.06172	2.59994	0.0113576	-0.526867
1227	0055250-84-5	Training	3.47	1.6415	2.11683	1.8285	1.35317			*	*		*
1228	0055335-06-3	Training	-0.91	0.801406	0.199252	-1.71141	-1.10925			*	*		*
1229	0055720-37-1	Training	4.43	3.3416	3.94939	1.0884	0.480613			*
1230	0056113-42-9	Prediction	1.05714	1.65713	1.41687	-0.599992	-0.359732
1231	0056348-72-2	Training	4.16629	3.41483	3.49974	0.751455	0.666546
1232	0056558-16-8	Training	4.81	4.03264	4.45604	0.777362	0.35396
1233	0056558-17-9	Prediction	4.81	4.01367	4.3783	0.796335	0.431703
1234	0056773-42-3	Training	2.93	1.75517	2.90916	1.17483	0.0208377			*
1235	0056803-37-3	Training	3.09571	2.13276	2.27338	0.962955	0.822337
1236	0057018-04-9	Training	2.4934	2.58262	2.16828	-0.0892215	0.325119
1237	0057055-39-7	Prediction	2.03802	2.29584	2.56482	-0.257819	-0.526797
1238	0057057-83-7	Training	2.005	2.01041	2.2128	-0.0054102	-0.207803
1239	0057117-31-4	Training	4.08	3.94607	4.01113	0.13393	0.0688679
1240	0057117-39-2	Training	2.72	3.6426	3.64157	-0.922601	-0.921573
1241	0057117-41-6	Training	3.58	3.94859	4.01252	-0.368593	-0.432518
1242	0057117-43-8	Training	3.57	3.95361	4.01527	-0.383615	-0.445267
1243	0057117-44-9	Prediction	3.94	4.27412	3.84453	-0.334117	0.0954652
1244	0057160-47-1	Training	1.825	1.19254	0.94907	0.632456	0.87593
1245	0057465-28-8	Training	4.24556	4.00076	4.44569	0.244792	-0.200131
1246	0057567-84-7	Training	0.647143	0.747611	0.836949	-0.100468	-0.189806
1247	0057653-85-7	Prediction	3.22	4.02558	3.49773	-0.805575	-0.27773
1248	0058011-68-0	Training	0.765	2.20556	2.35147	-1.44056	-1.58647			*	*		*
1249	0058567-11-6	Prediction	2.74	2.18034	2.02512	0.559664	0.71488
1250	0059039-21-3	Training	3.79	3.12476	3.27726	0.665244	0.512739
1251	0059080-33-0	Training	3.57323	2.72075	2.80672	0.852476	0.766513
1252	0059080-37-4	Training	4.31823	2.76183	2.83886	1.5564	1.47937			*	*		*
1253	0059365-60-5	Training	0.810801	1.48362	1.11781	-0.672824	-0.307013
1254	0059722-76-8	Prediction	2.00366	1.25596	1.13736	0.747701	0.866305
1255	0059756-60-4	Training	0.706071	1.96165	2.19059	-1.25558	-1.48452			*	*		*
1256	0060123-64-0	Training	4.21	3.7219	3.91937	0.488105	0.290628
1257	0060123-65-1	Training	4.08	3.71871	3.91731	0.361286	0.162693
1258	0060145-21-3	Training	4.58	4.02004	4.45198	0.559961	0.128019
1259	0060207-90-1	Training	1.27556	2.48384	2.03142	-1.20828	-0.755861			*
1260	0060628-17-3	Training	1.945	2.74069	2.6217	-0.795687	-0.676699
1261	0060851-34-5	Training	3.98	4.27178	3.87276	-0.291777	0.107237
1262	0061328-45-8	Training	4.11	3.41832	3.50232	0.691684	0.607681
1263	0061328-46-9	Prediction	4.24	3.41832	3.49921	0.821684	0.74079
1264	0061391-87-5	Training	3.23512	1.3373	1.42964	1.89783	1.80548			*	*		*
1265	0061788-32-7	Training	4.17	3.04586	3.22131	1.12414	0.948694			*
1266	0061788-76-9	Training	1.845	2.97273	3.05353	-1.12773	-1.20853			*	*		*
1267	0061790-13-4	Training	0.875	0.817722	1.30049	0.0572781	-0.42549
1268	0061949-76-6	Prediction	2.44464	1.98176	2.2497	0.462882	0.194945
1269	0061968-28-3	Training	1.34378	0.955813	0.911215	0.387969	0.432567
1270	0061968-52-3	Training	0.951557	0.665337	0.87328	0.28622	0.0782772
1271	0062338-09-4	Prediction	3.34	2.53003	2.81587	0.809972	0.524128
1272	0062615-08-1	Training	3.11	3.65338	3.64875	-0.543385	-0.53875
1273	0062796-65-0	Training	3.41667	3.72712	4.15565	-0.310449	-0.738987
1274	0063428-00-2	Training	1.1	1.54319	1.13802	-0.443189	-0.0380221
1275	0064700-56-7	Prediction	0.72	1.73853	1.84637	-1.01853	-1.12637	**	**			**
1276	0065281-76-7	Training	1.5937	2.20463	2.1152	-0.610928	-0.521491
1277	0065310-45-4	Training	1.82472	2.19891	2.10956	-0.374195	-0.28484
1278	0066108-37-0	Training	2.56615	1.52731	1.66352	1.03884	0.902636			*
1279	0066215-27-8	Training	0	0.706066	0.299563	-0.706066	-0.299563
1280	0066246-88-6	Training	1.97	2.67338	2.47299	-0.703384	-0.502991
1281	0066332-96-5	Prediction	1.45837	1.10637	1.07107	0.351996	0.387301
1282	0066735-04-4	Training	1.26772	1.21365	1.43341	0.0540651	-0.165694
1283	0066841-25-6	Training	2.47	1.904	2.08218	0.565997	0.387821
1284	0067028-18-6	Training	3.23667	3.40186	3.6353	-0.165191	-0.398636
1285	0067306-00-7	Training	2.2	2.75511	2.52155	-0.555109	-0.321549
1286	0067375-30-8	Training	2.34422	1.87903	2.03034	0.465197	0.313887
1287	0067562-39-4	Prediction	3.535	4.61968	3.45135	-1.08468	0.0836469	**
1288	0067564-91-4	Training	3.03	2.61471	2.40883	0.41529	0.621172
1289	0067905-19-5	Prediction	3.75	2.17782	2.68993	1.57218	1.06007	**	**			**
1290	0068085-85-8	Prediction	2.97	1.89924	2.24685	1.07076	0.723153	**
1291	0068194-05-8	Training	4.18	4.02321	4.45301	0.156792	-0.273006
1292	0068194-17-2	Prediction	5.37333	4.98942	4.41351	0.383915	0.959827
1293	0069806-40-2	Training	1.23	1.53387	1.76075	-0.303869	-0.530745
1294	0070124-77-5	Training	3.43	1.70355	1.65498	1.72645	1.77502			*	*		*
1295	0070288-86-7	Training	1.70667	0.47018	1.05361	1.23649	0.653056			*
1296	0070362-47-9	Prediction	5	3.71675	4.09984	1.28325	0.900162	**
1297	0070648-26-9	Training	3.9	4.27412	3.87455	-0.374117	0.0254455
1298	0071048-82-3	Prediction	2.14	2.02575	1.49623	0.114246	0.643775
1300	0071767-67-4	Training	1.41946	1.96749	2.11519	-0.548034	-0.695736
1301	0072416-87-6	Prediction	1.24	2.68987	2.82494	-1.44987	-1.58494	**	**			**
1302	0074051-80-2	Training	0.51	1.58309	1.57956	-1.07309	-1.06956			*	*		*
1303	0074338-50-4	Training	3.04	3.32933	3.7957	-0.289327	-0.755699
1304	0074918-40-4	Prediction	3.01	3.0825	2.97691	-0.0725045	0.0330907
1305	0075627-02-0	Training	2.96	4.28109	3.87988	-1.32109	-0.919883			*
1307	0076738-62-0	Training	1.54545	2.19044	2.20657	-0.644985	-0.661111
1308	0077501-63-4	Training	2.48	1.6638	1.80434	0.816201	0.675663
1309	0079060-60-9	Training	2.78	4.28109	3.87988	-1.50109	-1.09988			*	*		*
1310	0079277-27-3	Training	-0.1	-0.462366	0.297029	0.362366	-0.397029
1311	0079538-32-2	Training	3.48	2.13737	2.50197	1.34263	0.978029			*
1312	0079617-96-2	Training	2.62	3.03821	3.06448	-0.418215	-0.444481
1313	0079755-43-4	Training	1.17	1.81782	1.36036	-0.647824	-0.19036
1314	0079983-71-4	Prediction	1.61	2.44752	2.11101	-0.83752	-0.501012
1315	0080793-17-5	Training	3.41	3.13488	3.18535	0.275116	0.224653
1316	0080844-07-1	Prediction	3.6	2.6494	2.52808	0.950601	1.07192		**
1317	0081335-77-5	Prediction	0.2	0.675048	1.042	-0.475048	-0.842002
1318	0082097-50-5	Prediction	0.11	-0.150919	0.788987	0.260919	-0.678987
1319	0082657-04-3	Prediction	2.645	2.27163	2.63255	0.373372	0.0124454
1320	0083055-99-6	Training	0.2	-0.120448	0.488063	0.320448	-0.288063
1321	0083704-22-7	Training	3.41	3.64801	3.64518	-0.238011	-0.235178
1322	0084087-01-4	Training	-0.1	1.20608	1.00145	-1.30608	-1.10145			*	*		*
1323	0084852-15-3	Training	2.56884	1.81508	2.13487	0.75376	0.433964
1324	0085954-11-6	Training	0.92	2.50274	2.21748	-1.58274	-1.29748			*	*		*
1325	0090268-23-8	Training	0.49	1.23019	0.680322	-0.740191	-0.190322
1326	0090268-24-9	Training	0.49	1.35524	0.277408	-0.865242	0.212592
1327	0092296-04-3	Training	-0.2	0.812689	0.799514	-1.01269	-0.999514			*	*		*
1328	0092341-06-5	Prediction	3.2	4.27877	3.84784	-1.07877	-0.647837	**
1329	0095737-68-1	Training	3.14	2.18359	2.01366	0.956411	1.12634				*
1330	0095759-44-7	Training	1.93	3.22748	3.33107	-1.29748	-1.40107			*	*		*
1331	0095977-29-0	Prediction	0.94	0.766884	0.898129	0.173116	0.0418715
1332	0096489-71-3	Training	3.19333	1.76816	1.87266	1.42517	1.32067			*	*		*
1333	0097038-96-5	Training	4.97	2.7894	2.86636	2.1806	2.10364			*	*		*
1334	0099387-89-0	Training	2.59	2.10502	1.9816	0.484984	0.608395
1335	0100468-92-6	Prediction	1.86333	2.19997	2.79334	-0.336632	-0.930011
1336	0104294-16-8	Training	3.95	3.72822	3.92346	0.221781	0.0265411
1337	0107534-96-3	Training	1.795	2.38597	1.65718	-0.590968	0.137818
1338	0110553-27-0	Prediction	1.7	2.16638	2.63044	-0.466383	-0.93044
1339	0111158-11-3	Prediction	2.83	2.82001	3.00688	0.00999347	-0.176879
1340	0113136-77-9	Training	-0.4	1.22295	0.961714	-1.62295	-1.36171			*	*		*
1341	0114012-04-3	Training	1.21341	2.14828	2.01689	-0.934871	-0.80348
1342	0114311-32-9	Training	-1	0.467174	0.789363	-1.46717	-1.78936			*	*		*
1343	0116020-44-1	Training	2.89	2.95887	3.16387	-0.0688736	-0.273866
1344	0118134-30-8	Training	1.9	2.4053	2.09331	-0.505296	-0.193311
1345	0119168-77-3	Training	1.01	1.54233	1.26029	-0.532334	-0.250286
1346	0120928-09-8	Prediction	2.71	2.50589	2.4818	0.204111	0.228201
1347	0121552-61-2	Prediction	2.59	1.76772	2.0507	0.822279	0.539298
1348	0123251-96-7	Prediction	0.0914286	1.62212	1.57157	-1.53069	-1.48014	**	**			**
1349	0124729-02-8	Training	2.07	2.81257	2.66167	-0.742572	-0.591669
1350	0126690-66-2	Prediction	3.29	2.25049	2.52514	1.03951	0.76486	**
1351	0131983-72-7	Training	0.78	2.54403	1.72675	-1.76403	-0.946749			*
1352	0132182-92-4	Prediction	3.41	2.91939	2.8909	0.490608	0.519098
1353	0134605-64-4	Training	0.6	1.24307	1.02402	-0.643071	-0.424017
1354	0134701-20-5	Training	0.78	2.55341	2.45792	-1.77341	-1.67792			*	*		*
1355	0135861-56-2	Training	1.23	1.81023	1.88913	-0.58023	-0.659125
1356	0145701-23-1	Training	0.18	0.267409	0.730054	-0.0874093	-0.550054
1357	0154279-60-4	Training	0.93	2.65082	2.08065	-1.72082	-1.15065			*	*		*
1358	0155041-85-3	Training	2.08	3.19415	3.35088	-1.11415	-1.27088			*	*		*
1359	0155569-91-8	Prediction	1.79333	0.45398	0.940427	1.33935	0.852906	**
1360	0156573-09-0	Training	2.69	2.00883	1.92515	0.681171	0.764849
1361	0160535-46-6	Training	1.41	1.47388	1.95488	-0.0638821	-0.544881
1362	0174300-34-6	Training	0.292706	1.18237	1.23739	-0.889663	-0.944686
1363	0174350-05-1	Training	1.87	2.74774	2.61124	-0.87774	-0.741241
1364	0180409-60-3	Training	2.72	1.09097	0.928821	1.62903	1.79118			*	*		*
1365	0181587-01-9	Training	0.98	1.22976	0.986667	-0.249756	-0.0066673
1366	0183677-34-1	Training	1.78	1.65918	1.30512	0.120821	0.474881
1367	0188023-86-1	Prediction	2.61844	2.10323	2.24745	0.515211	0.370991
1368	0195209-93-9	Prediction	0.0517769	1.09961	1.2839	-1.04784	-1.23212	**	**			**
1369	0208338-50-5	Prediction	1.28	3.03285	2.95312	-1.75285	-1.67312	**	**			**
1370	0216698-07-6	Training	1.56	2.31554	2.21787	-0.755538	-0.657867
1371	0219750-66-0	Prediction	3.37	2.64296	2.91724	0.727036	0.452758
1372	0250736-57-3	Prediction	1.43	1.20427	1.17054	0.225734	0.259458
1373	0303186-20-1	Training	1.81	3.05365	2.97377	-1.24365	-1.16377			*	*		*
1374	0371146-04-2	Training	1.77	1.09068	1.38835	0.679316	0.381653
1375	0701909-41-3	Training	1.87	1.83016	1.94735	0.0398422	-0.0773512
1376	0727678-39-9	Prediction	1.11	0.691562	1.72965	0.418438	-0.619655
1377	1072957-71-1	Training	2.475	1.97819	2.61805	0.496811	-0.143053
1378	1204225-72-8	Training	2.82	2.17152	2.31436	0.648484	0.505642
1379	1424148-99-1	Prediction	1.71	0.658494	1.06138	1.05151	0.648622	**
1380	UNK-01	Prediction	0.756667	1.44475	1.33535	-0.688081	-0.578681
1381	UNK-02	Training	3.76	2.84508	2.90172	0.91492	0.858278
1382	UNK-03	Prediction	3.19	2.85895	2.94002	0.331047	0.249984
1383	UNK-04	Training	2.96	2.53254	2.44151	0.427465	0.518494
1384	UNK-05	Prediction	2.85	2.87584	2.9542	-0.0258424	-0.104198
1385	UNK-06	Training	3.92	2.76522	2.67144	1.15478	1.24856			*	*		*
1386	UNK-07	Training	0.085	1.06937	0.705089	-0.984372	-0.620089
1387	UNK-08	Prediction	2.155	1.60657	1.65634	0.548426	0.498662
1388	UNK-11	Training	0.51	0.844229	0.59871	-0.334229	-0.0887102
1389	UNK-12	Training	0.095	-0.953264	0.276689	1.04826	-0.181689			*
1390	UNK-13	Training	0.09	2.1305	2.01731	-2.0405	-1.92731			*	*		*
1391	UNK-14	Training	2.23	1.30601	0.978101	0.923987	1.2519				*
1392	UNK-15	Prediction	0.095	1.45174	1.27591	-1.35674	-1.18091	**	**			**
1393	UNK-18	Training	3.71	2.75718	2.6635	0.952823	1.0465				*
1394	UNK-19	Training	3.2	2.13111	2.29018	1.06889	0.909819			*
1395	UNK-21	Training	1.29	0.667293	1.90307	0.622707	-0.613072

## Sheet: Table S8
	Criteria	Count residuals	% on the total
Training	Number of residuals	222	100
Training	Residuals > 1 MLR	193	20.9783
Training	Residuals > 1 ANN	151	16.413
Training	Common Residuals >1	122	54.955
Prediction	Number of residuals	114	100
Prediction	Residuals > 1 MLR	91	19.8257
Prediction	Residuals > 1 ANN	86	18.7364
Prediction	Common Residuals >1	63	55.2632

## Sheet: Table S9
Table S9. List of chemicals identified by ID and CAS, splitting, experimental LogBCF values, a priori classes used to build classification models, values of the molecular descriptors selected by GA in the LDA model, and the predictions generated by different classification techniques.
CAS Order	CAS	Split	Exp_log_BCF	Exp_Class	IC2	MWC4	TopoPSA	MAXDP	Pred_LDA	Pred_ANN
1	0000020-18-0	Training	1.41	notB	4.07457	7.07412	9.23	6.9416	notB	notB
2	0000050-28-2	Prediction	0.706667	notB	4.35195	6.632	40.46	4.37249	notB	notB
3	0000050-29-3	Training	3.64813	B	2.99468	6.31173	0	0.398593	B	B
4	0000050-31-7	Training	0.588333	notB	3.13957	5.77765	37.3	3.86534	notB	notB
5	0000050-32-8	Training	2.5418	notB	2.38205	6.64769	0	0.309074	B	B
6	0000057-41-0	Training	0.54	notB	3.05971	6.43455	58.2	5.31311	notB	notB
7	0000057-97-6	Training	2.91	notB	2.9201	6.57508	0	0.270278	B	B
8	0000060-00-4	Training	0.345	notB	3.05881	5.99894	155.68	3.55499	notB	notB
9	0000060-51-5	Training	0.768378	notB	3.4906	5.47646	114.76	3.97843	notB	notB
10	0000060-57-1	Prediction	3.48753	B	3.71785	6.98564	12.53	2.60055	B	B
11	0000063-25-2	Training	1.18675	notB	3.39597	5.99396	38.33	4.09156	notB	notB
12	0000070-30-4	Prediction	2.16595	notB	3.43971	6.47543	40.46	4.52195	notB	notB
13	0000072-54-8	Training	4.48	B	3.09307	6.19644	0	0.367212	B	B
14	0000075-09-2	Training	1.15149	notB	1.05754	2.56495	0	0.0771605	notB	notB
15	0000075-35-4	Training	0.956485	notB	1.9183	3.61092	0	0.70096	notB	notB
16	0000075-65-0	Training	0.311667	notB	1.68794	4.39445	20.23	2.52083	notB	notB
17	0000075-91-2	Prediction	0.58	notB	1.91974	4.63473	29.46	1.90278	notB	notB
18	0000076-44-8	Training	3.50358	B	4.00489	6.72022	0	0.730722	B	B
19	0000078-32-0	Training	3.16733	notB	2.96761	6.58341	54.57	6.43297	notB	notB
20	0000078-63-7	Training	3.61	B	2.00626	6.21261	36.92	2.03835	B	B
21	0000079-94-7	Training	2.46984	notB	3.30167	6.49979	40.46	4.09421	notB	notB
22	0000081-14-1	Training	3.09	notB	3.39275	6.51175	103.35	4.75246	notB	notB
23	0000081-15-2	Prediction	3.67299	B	3.1751	6.51175	129.42	4.31056	notB	notB
24	0000081-16-3	Prediction	0.38	notB	3.4906	6.16331	88.77	4.29139	notB	notB
25	0000084-57-1	Prediction	1.05	notB	4.28679	6.40853	95.42	4.75944	notB	notB
26	0000084-66-2	Training	2.07	notB	3.32323	5.93225	52.6	4.54421	notB	notB
27	0000085-01-8	Prediction	3.32889	B	2.05459	6.08904	0	0.178241	B	B
28	0000085-41-6	Training	1.135	notB	2.875	5.82008	46.17	3.94398	notB	notB
29	0000085-68-7	Training	1.62739	notB	3.87059	6.31897	52.6	5.24324	notB	notB
30	0000087-83-2	Training	2.61975	notB	2.3656	5.85507	0	0.430098	B	B
31	0000088-06-2	Training	2.47889	notB	2.87314	5.54126	20.23	3.43071	notB	notB
32	0000088-19-7	Prediction	0.160129	notB	3.38418	5.68017	68.54	3.97963	notB	notB
33	0000088-75-5	Prediction	1.10726	notB	3.24022	5.45959	63.37	3.06731	notB	notB
34	0000089-72-5	Prediction	1.49	notB	3.54347	5.54908	20.23	3.41204	notB	notB
35	0000091-22-5	Training	0.69994	notB	2.93983	5.57215	12.89	1.1812	notB	notB
36	0000091-58-7	Training	3.63	B	2.43874	5.70711	0	0.276406	B	B
37	0000091-64-5	Training	1.31	notB	3.38158	5.70711	17.07	3.71676	notB	notB
38	0000091-94-1	Prediction	2.35582	notB	3.02699	6.11147	52.04	1.84977	B	B
39	0000092-06-8	Training	1.32899	notB	1.98549	6.20456	0	0.240741	B	B
40	0000092-52-4	Prediction	2.61	notB	1.78993	5.68698	0	0.12037	B	B
41	0000092-83-1	Training	3.62	B	2.83496	6.07074	9.23	2.27741	B	B
42	0000092-86-4	Training	3.55512	B	2.36852	5.90536	0	0.266528	B	B
43	0000092-88-6	Prediction	1.525	notB	2.58496	5.90536	40.46	3.10769	notB	notB
44	0000094-52-0	Training	0.298614	notB	3.80776	5.83773	71.82	3.33775	notB	notB
45	0000095-64-7	Prediction	0.880708	notB	3.00869	5.35186	26.02	1.5275	notB	notB
46	0000095-94-3	Training	3.81198	B	1.9183	5.53339	0	0.467936	B	B
47	0000096-69-5	Training	0.816667	notB	3.34357	6.67077	65.76	4.34988	notB	notB
48	0000099-88-7	Training	1.035	notB	3.15357	5.42495	26.02	1.52682	notB	notB
49	0000100-25-4	Prediction	-0.398455	notB	2.5	5.65249	86.28	3.11778	notB	notB
50	0000100-40-3	Training	2.24959	notB	3.24644	5.04343	0	0.750463	notB	notB
51	0000100-80-1	Training	1.55	notB	3.47135	5.26269	0	0.672037	notB	notB
52	0000101-20-2	Training	1.98	notB	3.13697	6.19236	41.13	4.87459	notB	notB
53	0000102-06-7	Training	0.8	notB	2.69491	5.92693	47.91	2.74134	notB	notB
54	0000106-41-2	Training	1.653	notB	2.77736	5.1299	20.23	2.78264	notB	notB
55	0000107-39-1	Training	2.81666	notB	2.83333	5.05625	0	0.840486	notB	notB
56	0000108-00-9	Training	0.25	notB	2.6416	4.29046	29.26	1.18778	notB	notB
57	0000108-38-3	Training	1.20333	notB	2.53049	5.14166	0	0.166667	B	notB
58	0000108-39-4	Training	1.22667	notB	3.20282	5.14166	20.23	2.81306	notB	notB
59	0000108-70-3	Training	3.32008	B	2	5.35186	0	0.359078	B	B
60	0000108-87-2	Training	2.33252	notB	2.26236	4.89035	0	0.360278	notB	B
61	0000108-88-3	Training	1.505	notB	2.3656	4.89035	0	0.0833333	notB	notB
62	0000108-99-6	Training	0.97	notB	3.18201	4.89035	12.89	0.884259	notB	notB
63	0000110-00-9	Training	0.503763	notB	2.28104	4.39445	13.14	1.08333	notB	notB
64	0000110-85-0	Prediction	0.22095	notB	1.75	4.57471	24.06	0.722222	notB	notB
65	0000110-86-1	Training	1.94	notB	2.48171	4.57471	12.89	0.784722	notB	notB
66	0000111-44-4	Training	1.00987	notB	2.44022	4.31749	9.23	1.71373	notB	notB
67	0000112-24-3	Training	0.2	notB	2.4138	4.81218	76.1	1.26651	notB	notB
68	0000112-41-4	Training	3.4	B	2.71813	5.04343	0	0.718993	notB	notB
69	0000115-32-2	Training	3.68262	B	3.10781	6.44731	20.23	5.62164	notB	B
70	0000115-77-5	Training	-0.0297518	notB	2.1066	5.1985	80.92	2.49653	notB	notB
71	0000115-90-2	Prediction	1.68	notB	3.80744	6.08904	105.87	4.48868	notB	notB
72	0000117-80-6	Training	4.04	B	2.9477	6.09357	34.14	4.82948	notB	notB
73	0000118-74-1	Training	3.88382	B	1	5.85507	0	0.20454	B	B
74	0000118-79-6	Training	2.51253	notB	2.87314	5.54126	20.23	3.47362	notB	notB
75	0000118-82-1	Training	2.42833	notB	2.61366	6.93634	40.46	5.05549	B	B
76	0000119-64-2	Prediction	2.48	notB	2.91398	5.57215	0	0.258426	B	notB
77	0000120-54-7	Training	1.11774	notB	2.94644	6.14633	171.86	0.924482	notB	notB
78	0000121-03-9	Training	0.105	notB	3.84423	5.96358	105.89	3.90963	notB	notB
79	0000121-75-5	Training	0.994439	notB	3.85268	6.02345	138.26	4.96176	notB	notB
80	0000122-20-3	Training	-0.73	notB	2.9531	5.50939	63.93	3.14364	notB	notB
81	0000122-57-6	Training	0.745	notB	3.19615	5.38907	17.07	3.53026	notB	notB
82	0000123-77-3	Training	1.175	notB	2.25163	4.77912	110.9	2.65778	notB	notB
83	0000124-11-8	Training	2.17897	notB	3.02418	4.67283	0	0.678479	notB	notB
84	0000127-18-4	Prediction	1.71746	notB	0.918296	4.46591	0	0.231824	B	B
85	0000140-66-9	Prediction	1.73667	notB	3.06464	6.03309	20.23	3.25497	notB	notB
86	0000144-19-4	Training	-0.222879	notB	2.98523	5.42495	40.46	3.49421	notB	notB
87	0000184-90-8	Training	1.295	notB	3.20337	5.83188	29.43	3.83244	notB	notB
88	0000198-55-0	Prediction	2.38	notB	2.28064	6.66058	0	0.246574	B	B
89	0000206-44-0	Training	3.322	B	2.21086	6.39859	0	0.219907	B	B
90	0000218-01-9	Prediction	2.4	notB	2.07291	6.42811	0	0.236111	B	B
91	0000218-17-8	Training	0.46	notB	3.5713	5.85507	128.18	4.5419	notB	notB
92	0000262-12-4	Prediction	3.85	B	2.1867	6.07074	18.46	2.15241	B	B
93	0000281-23-2	Training	3.42	B	1.83393	5.88888	0	0.104167	B	B
94	0000294-62-2	Training	3.53376	B	0.918296	5.26269	0	0	B	B
95	0000298-02-2	Prediction	1.95	notB	3.35591	5.50126	110.96	2.5357	notB	notB
96	0000298-04-4	Training	2.08222	notB	3.28563	5.56452	110.96	2.55893	notB	notB
97	0000306-83-2	Training	1.355	notB	2.15564	4.93447	0	3.26003	notB	notB
98	0000306-98-9	Training	3.92	B	2.52206	6.99668	0	5.47312	B	B
99	0000307-34-6	Training	3.59	B	1.98777	6.89467	0	4.75875	B	B
100	0000307-70-0	Training	3.355	B	2.42798	7.10414	20.23	5.24621	B	B
101	0000315-18-4	Training	1.41667	notB	3.49808	6.02345	41.57	4.07886	notB	notB
102	0000330-55-2	Prediction	1.06586	notB	3.80307	5.88332	41.57	4.4531	notB	notB
103	0000335-36-4	Training	3.4675	B	2.96489	6.9613	9.23	5.41062	B	B
104	0000335-57-9	Prediction	3.5	B	2.02426	6.7511	0	4.57125	B	B
105	0000335-76-2	Training	3.58833	B	2.76039	7.08087	37.3	5.13366	B	B
106	0000375-95-1	Training	3.4	B	2.86576	6.96319	37.3	4.9959	B	B
107	0000376-06-7	Training	4.03125	B	2.4278	7.44833	37.3	5.54656	B	B
108	0000462-08-8	Training	-0.19	notB	3.2389	4.89035	38.91	1.29528	notB	notB
109	0000475-03-6	Training	3.33	B	3.6955	6.01372	0	0.361435	B	B
110	0000492-97-7	Training	3.55	B	2.75	5.57215	56.48	0.449907	notB	B
111	0000493-01-6	Training	3.33307	B	1.80735	5.57215	0	0.0601852	B	B
112	0000514-10-3	Prediction	1.90184	notB	4.14237	6.67834	37.3	4.94202	notB	notB
113	0000534-52-1	Prediction	0.129038	notB	3.68418	5.92693	106.51	3.37176	notB	notB
114	0000535-77-3	Prediction	2.9265	notB	3.2406	5.43372	0	0.240741	notB	notB
115	0000567-77-6	Prediction	2.69	notB	3.51603	5.36129	0	0.686422	notB	notB
116	0000583-39-1	Training	0.419932	notB	3.24022	5.65948	56.48	1.33578	notB	notB
117	0000605-02-7	Prediction	3.51	B	2.02024	6.1591	0	0.178241	B	B
118	0000608-93-5	Training	3.81084	B	1.78416	5.70711	0	0.514942	B	B
119	0000609-89-2	Training	1.38091	notB	3.64022	5.7589	63.37	3.40811	notB	notB
120	0000611-21-2	Training	0.686823	notB	3.34644	5.2832	12.03	0.595231	notB	notB
121	0000626-23-3	Prediction	0.475	notB	2.62809	4.97673	12.03	0.979167	notB	notB
122	0000626-39-1	Training	3.84883	B	2	5.35186	0	0.432726	B	B
123	0000634-66-2	Training	3.681	B	1.9183	5.54908	0	0.358906	B	B
124	0000634-67-3	Training	2.094	notB	3.03915	5.54908	26.02	1.77478	notB	notB
125	0000634-83-3	Training	2.45	notB	2.80735	5.70711	26.02	1.90179	notB	notB
126	0000634-90-2	Prediction	2.94312	notB	2.18872	5.54126	0	0.43701	B	B
127	0000698-83-6	Prediction	1.56	notB	4.07066	6.12468	57.61	4.69435	notB	notB
128	0000729-33-5	Training	2.63	notB	3.98071	6.59715	50.42	4.68929	notB	notB
129	0000732-26-3	Training	4.17334	B	2.19295	6.41182	20.23	4.65022	B	B
130	0000782-74-1	Training	3.37313	B	2.77736	5.99894	24.06	0.787114	B	B
131	0000789-02-6	Prediction	3.595	B	3.08362	6.32615	0	0.413075	B	B
132	0000808-31-5	Prediction	3.13	notB	3.63397	6.45047	9.23	4.84005	notB	B
133	0000877-10-1	Prediction	2.73282	notB	2.19716	5.85507	0	0.346543	B	B
134	0000883-20-5	Prediction	2.19453	notB	2.85547	6.18826	0	0.261574	B	B
135	0000920-66-1	Training	0.2739	notB	2.12581	5.55683	20.23	2.97512	notB	notB
136	0000935-95-5	Training	2.15	notB	2.77736	5.70711	20.23	3.7021	notB	notB
137	0000938-22-7	Training	3.34	B	3.07782	5.78996	9.23	1.93771	B	B
138	0000938-86-3	Training	3.45663	B	2.95282	5.78383	9.23	1.87304	B	B
139	0000944-61-6	Prediction	4.40001	B	2.64644	5.99396	18.46	1.97007	B	B
140	0000946-30-5	Training	0.395714	notB	3.79465	5.96358	105.89	3.9358	notB	notB
141	0001000-76-6	Training	3.5	B	3.50398	6.19236	18.46	2.4934	B	notB
142	0001024-57-3	Training	4.1	B	3.91487	6.88244	12.53	2.64927	B	B
143	0001222-05-5	Prediction	3.02	notB	3.37944	6.608	9.23	2.21496	B	B
144	0001235-13-4	Prediction	0.646667	notB	4.41231	6.73934	145	4.71493	notB	notB
145	0001323-65-5	Training	2.29	notB	3.01997	6.20051	20.23	4.26383	notB	notB
146	0001445-75-6	Training	0	notB	2.60113	5.45959	45.34	4.51373	notB	notB
147	0001460-02-2	Training	3.37275	B	1.91974	6.31536	0	0.384167	B	B
148	0001490-04-6	Training	0.981677	notB	3.09778	5.60947	20.23	3.70977	notB	notB
149	0001544-19-0	Training	4.35	B	3.59164	6.76273	18.46	4.95232	B	B
150	0001582-09-8	Training	3.30383	B	3.894	6.46303	89.52	4.84483	notB	notB
151	0001678-91-7	Prediction	3.425	B	2.17769	5.04343	0	0.315463	B	B
152	0001689-84-5	Prediction	1.255	notB	3.23593	5.62402	44.02	3.43375	notB	notB
153	0001712-70-5	Training	3.2639	notB	3.26083	5.42495	0	0.868391	notB	notB
154	0001817-47-6	Training	1.82667	notB	3.24053	5.65249	43.14	3.28764	notB	notB
155	0001825-21-4	Training	3.3779	B	2.55504	5.92693	9.23	2.04472	B	B
156	0001825-31-6	Training	3.58333	B	2.41938	5.86079	0	0.291838	B	B
157	0001836-75-5	Training	3.3375	B	3.3778	6.1717	52.37	3.53796	notB	notB
158	0001837-65-7	Training	0.52	notB	4.27565	7.71735	336.1	5.76645	notB	notB
159	0001839-63-0	Training	3.34	B	2.41938	5.35186	0	0.381111	B	B
160	0001843-05-6	Prediction	1.9936	notB	3.81817	6.34739	46.53	5.36313	notB	notB
161	0001892-57-5	Training	0.18	notB	3.51219	5.03044	27.96	0.989722	notB	notB
162	0001912-24-9	Training	0.667439	notB	3.43131	5.77765	62.73	1.25561	notB	notB
163	0001940-42-7	Training	2.225	notB	3.39275	5.53339	20.23	3.31758	notB	notB
164	0002043-47-2	Training	1.57	notB	3.23686	6.22851	20.23	4.33785	notB	notB
165	0002050-74-0	Training	3.79	B	2.53049	5.86647	0	0.260912	B	B
166	0002050-75-1	Prediction	4.04	B	2.6416	5.83773	0	0.354338	B	B
167	0002050-76-2	Training	1.34429	notB	3.17611	5.97889	20.23	3.84176	notB	notB
168	0002051-24-3	Prediction	3.99661	B	1.78993	6.6107	0	0.220428	B	B
169	0002082-79-3	Training	1	notB	3.25334	6.77422	46.53	5.33574	B	notB
170	0002104-96-3	Prediction	3.00362	notB	3.60539	6.06146	69.59	2.62826	notB	notB
171	0002136-99-4	Prediction	4.9225	B	2.36852	6.47235	0	0.581381	B	B
172	0002198-77-8	Training	4.04	B	2.6416	5.826	0	0.323412	B	B
173	0002371-42-8	Training	1.47667	notB	3.02237	6.25575	20.23	4.27951	notB	notB
174	0002385-85-5	Training	3.30742	B	2.1867	7.46451	0	0.0895396	B	B
175	0002425-85-6	Training	0.445	notB	4.3253	6.52356	84.6	5.05972	notB	notB
176	0002437-79-8	Training	4.0775	B	2.66353	6.12905	0	0.418477	B	B
177	0002440-02-0	Training	4.05	B	3.49923	6.4599	0	0.476037	B	B
178	0002440-22-4	Training	2.5	notB	3.64998	6.27476	50.42	3.81271	notB	notB
179	0002446-69-7	Training	2.32	notB	3.51049	5.54908	20.23	3.06632	notB	notB
180	0002531-84-2	Training	3.48	B	2.86993	6.1717	0	0.23787	B	B
181	0002631-40-5	Training	1.28772	notB	3.74541	5.79606	38.33	4.0227	notB	notB
182	0002655-14-3	Training	0.599788	notB	3.50738	5.71373	38.33	3.87047	notB	notB
183	0002668-47-5	Prediction	3.93608	B	2.89555	6.48768	20.23	4.7314	B	B
184	0002691-41-0	Training	-0.0866667	notB	2.52164	6.24028	185.52	3.65655	notB	notB
185	0002719-61-1	Training	2.41	notB	2.90612	5.83773	0	0.35772	B	B
186	0002814-20-2	Prediction	0.355057	notB	3.4474	5.59471	41.79	3.86444	notB	notB
187	0003010-80-8	Training	3.95	B	2.71704	6.56667	20.23	5.73801	B	B
188	0003074-71-3	Training	3.32	B	2.6068	4.96284	0	0.347546	notB	notB
189	0003194-55-6	Training	3.78	B	1.9183	6.04263	0	0.232992	B	B
190	0003194-57-8	Training	3.655	B	1.9183	5.63835	0	0.20928	B	B
191	0003452-97-9	Training	0.855	notB	2.98108	5.273	20.23	2.63351	notB	notB
192	0003481-20-7	Training	2.775	notB	2.80735	5.70711	26.02	2.01765	notB	notB
193	0003520-72-7	Prediction	0.56	notB	3.98423	7.2349	107.64	5.97491	notB	notB
194	0003761-42-0	Prediction	1.26954	notB	3.96032	6.22456	112.11	4.64388	notB	notB
195	0003792-59-4	Training	4.16	B	3.68819	6.31897	60.36	3.06382	notB	notB
196	0003811-49-2	Training	1.75023	notB	3.69785	5.95324	69.59	2.33688	notB	notB
197	0003846-71-7	Prediction	3.65218	B	3.24577	6.6958	50.42	4.89235	notB	notB
198	0004051-66-5	Training	2.30833	notB	2.08112	6.43455	41.13	4.94158	B	notB
199	0004130-42-1	Training	3.5643	B	2.68793	6.24804	20.23	4.48001	B	B
200	0004286-23-1	Training	1.28	notB	3.38418	5.42495	20.23	2.90878	notB	notB
201	0004531-49-1	Training	0.49	notB	4.43511	7.19669	160.24	5.8927	notB	notB
202	0004821-19-6	Training	3.33093	B	2.76511	6.30445	20.23	4.6933	B	B
203	0004904-61-4	Training	3.61586	B	1.92193	5.26269	0	0.291454	B	B
204	0005103-71-9	Training	3.3863	B	3.75163	6.77194	0	0.528981	B	B
205	0005332-73-0	Training	0.02	notB	3.33718	4.07754	35.25	1.20222	notB	notB
206	0005409-83-6	Prediction	3.66	B	2.98709	6.22059	13.14	2.29876	B	B
207	0005902-51-2	Prediction	0.78	notB	3.2374	6.05678	46.5	4.82092	notB	notB
208	0006130-75-2	Training	2.78837	notB	3.15564	5.62402	9.23	1.76603	notB	notB
209	0006362-80-7	Training	3.58	B	3.29427	6.18415	0	1.23563	B	B
210	0006459-94-5	Prediction	1.84612	notB	4.70721	7.45761	243.43	5.8476	notB	notB
211	0006639-30-1	Training	3.50526	B	3.00624	5.53339	0	0.42704	B	B
212	0006674-22-2	Training	0.08	notB	3.34748	5.63121	15.6	1.55403	notB	notB
213	0006731-36-8	Training	4.00702	B	2.7377	6.42811	36.92	2.28924	B	B
214	0006842-15-5	Training	3.40622	B	2.9642	5.04343	0	0.640594	notB	notB
215	0006936-40-9	Training	3.69	B	2.95282	5.78996	9.23	1.97154	B	B
216	0007012-37-5	Prediction	4.43	B	2.67937	6.02345	0	0.386968	B	B
217	0007267-11-0	Training	1.09781	notB	3.33496	6.34036	74.6	4.24611	notB	notB
218	0007299-99-2	Training	0.92	notB	3.29771	6.88857	105.2	6.21409	notB	notB
219	0007745-89-3	Training	1.88	notB	3.29277	5.35186	26.02	1.55367	notB	notB
220	0007756-94-7	Training	3.40643	B	2.81248	5.66643	0	0.373264	B	B
221	0008001-35-2	Prediction	4.05923	B	3.93121	6.73934	0	1.84569	B	B
222	0010453-86-8	Prediction	3.55	B	4.43156	6.64769	39.44	5.4019	notB	notB
223	0011096-82-5	Prediction	4.51833	B	2.67937	6.39859	0	0.574924	B	B
224	0012674-11-2	Training	4.02741	B	2.67937	6.01859	0	0.363264	B	B
225	0013029-08-8	Training	2.212	notB	2.36852	5.94803	0	0.245415	B	B
226	0013049-38-2	Training	3.76	B	3.21953	6.02828	0	0.286481	B	B
227	0013116-53-5	Training	1.77	notB	2.1867	4.84419	0	0.145019	notB	notB
228	0013150-81-7	Training	3.18	notB	2.62822	5.24175	0	0.398796	B	B
229	0013358-11-7	Training	2.78305	notB	3.81318	6.80793	37.38	6.38832	notB	notB
230	0013540-50-6	Training	3.23702	notB	3.13921	5.95324	0	0.280093	B	B
231	0013987-01-4	Prediction	3.32	B	2.6068	4.96284	0	0.350694	notB	notB
232	0014233-37-5	Training	3.85	B	3.55553	6.65544	58.2	6.07385	notB	notB
233	0014802-03-0	Prediction	0.905	notB	3.36282	5.98896	56.34	5.29731	notB	notB
234	0014816-18-3	Training	2.95158	notB	3.6794	6.08904	105.74	3.1341	notB	notB
235	0015307-86-5	Training	1.92273	notB	3.73485	6.22851	49.33	3.89562	notB	notB
236	0015862-07-4	Prediction	3.99077	B	2.82688	6.03787	0	0.447874	B	B
237	0015968-05-5	Training	4.0575	B	2.48171	6.16331	0	0.32393	B	B
238	0016219-75-3	Prediction	2.75513	notB	3.74899	5.62402	0	0.372685	notB	notB
239	0016605-91-7	Training	3.92231	B	2.60694	5.9428	0	0.268134	B	B
240	0016606-02-3	Training	3.98727	B	2.67937	6.02345	0	0.376951	B	B
241	0016611-67-9	Prediction	1.89	notB	2.88684	6.07535	17.07	5.2637	notB	B
242	0016766-29-3	Training	3.5	B	3.00869	5.86079	18.46	1.86307	B	notB
243	0017302-11-3	Prediction	3.32	B	2.32366	5.09375	0	0.31348	B	B
244	0018259-05-7	Prediction	4.85	B	2.78993	6.2519	0	0.300013	B	B
245	0018708-70-8	Training	2.52546	notB	3.03915	5.77144	43.14	3.62515	notB	notB
246	0019408-74-3	Training	3.92	B	2.84535	6.54103	18.46	2.85614	B	B
247	0019780-74-6	Training	3.43	B	3.32533	5.10595	0	0.74722	notB	notB
248	0021850-44-2	Training	1.80667	notB	4.03498	6.78559	18.46	2.9268	B	notB
249	0022907-72-8	Training	3.5	B	2.53049	5.65249	0	0.375365	B	B
250	0024423-11-8	Prediction	3.63	B	2.54772	6.1717	0	0.310573	B	B
251	0025155-23-1	Training	2.655	notB	2.87196	6.74406	54.57	6.84599	notB	notB
252	0025291-17-2	Training	2.58	notB	3.13684	6.62141	0	4.68014	B	notB
253	0025321-09-9	Training	3.31156	B	2.47291	5.65249	0	0.236111	B	B
254	0025323-68-6	Training	4.02341	B	2.82688	6.04737	0	0.338844	B	B
255	0025394-13-2	Training	0.653333	notB	3.78714	6.57786	177.54	4.55727	notB	notB
256	0025429-29-2	Training	4.41644	B	2.76765	6.23245	0	0.401756	B	B
257	0025637-99-4	Training	3.46333	B	2.25163	6.04263	0	0.262711	B	B
258	0025640-78-2	Training	3.84	B	2.94118	5.99396	0	0.23787	B	B
259	0026399-36-0	Training	1.59	notB	4.14644	6.58617	89.52	4.91689	notB	notB
260	0026601-64-9	Training	3.93375	B	2.90195	6.33328	0	0.377945	B	B
261	0026630-87-5	Prediction	2.274	notB	4.59646	6.99118	150.79	6.06128	notB	notB
262	0026761-40-0	Training	1.08	notB	3.42568	6.49375	52.6	5.47461	notB	notB
263	0026898-17-9	Training	4.02097	B	2.91799	6.33683	0	0.262176	B	B
264	0026914-33-0	Prediction	3.98717	B	2.72013	6.14633	0	0.44835	B	B
265	0026967-76-0	Training	2.13286	notB	3.21649	6.83195	54.57	7.30266	notB	notB
266	0027193-29-9	Prediction	3.58	B	2.6806	5.9108	0	0.432195	B	B
267	0028076-73-5	Prediction	4.14	B	2.80575	6.14204	9.23	2.56805	B	B
268	0028519-02-0	Training	0.835	notB	3.684	6.75577	134.73	5.08623	notB	notB
269	0028575-17-9	Prediction	3.42449	B	2.98423	6.01859	0	0.211374	B	B
270	0028680-44-6	Training	3.81	B	2.44022	6.31173	0	0.373522	B	B
271	0028680-45-7	Prediction	3.58307	B	3.02864	6.49072	0	0.763744	B	B
272	0029082-74-4	Training	3.28563	notB	2.72722	6.1591	0	0.246222	B	B
273	0030171-80-3	Training	0.61	notB	3.75163	5.92693	21.76	2.27218	notB	notB
274	0031508-00-6	Training	4.585	B	2.69448	6.20859	0	0.487513	B	B
275	0031604-28-1	Training	4.4	B	2.90576	6.07993	0	0.448457	B	B
276	0031775-20-9	Prediction	0.49	notB	4.50753	7.21156	160.24	5.86525	notB	notB
277	0032598-10-0	Training	4.635	B	2.81104	6.1203	0	0.423957	B	B
278	0032598-11-1	Prediction	4.462	B	2.68128	6.1203	0	0.432853	B	B
279	0032598-14-4	Training	4.565	B	2.69448	6.21661	0	0.455466	B	B
280	0032690-93-0	Training	4.6	B	2.81104	6.1203	0	0.4649	B	B
281	0032774-16-6	Training	5.22	B	2.48171	6.28972	0	0.486975	B	B
282	0033025-41-1	Training	4.58	B	2.81104	6.12905	0	0.355871	B	B
283	0033284-50-3	Training	3.55	B	2.55034	5.93225	0	0.369942	B	B
284	0033284-53-6	Prediction	4.39	B	2.90195	6.14633	0	0.479276	B	B
285	0034364-42-6	Training	3.45	B	3.03651	6.85751	54.57	6.99388	notB	notB
286	0034643-46-4	Training	2.55789	notB	4.12728	6.09357	85.66	3.07449	notB	notB
287	0034883-39-1	Prediction	4.0696	B	2.60694	5.93225	0	0.354338	B	B
288	0034883-41-5	Prediction	3.34918	B	2.47718	5.92158	0	0.346238	B	B
289	0034883-43-7	Prediction	3.69	B	2.48171	5.92693	0	0.245415	B	B
290	0035065-27-1	Training	4.34188	B	2.66353	6.29711	0	0.533398	B	B
291	0035065-28-2	Prediction	5.435	B	2.66353	6.30445	0	0.533398	B	B
292	0035065-29-3	Prediction	3.53333	B	2.61075	6.38182	0	0.580404	B	B
293	0035693-92-6	Training	3.93	B	2.53187	6.05209	0	0.416948	B	B
294	0035693-99-3	Training	3.32483	B	2.66353	6.12905	0	0.432853	B	B
295	0035694-06-5	Training	3.995	B	2.81104	6.3081	0	0.548895	B	B
296	0035694-08-7	Training	5.052	B	2.36852	6.4599	0	0.611913	B	B
297	0035822-46-9	Training	3.5225	B	2.67937	6.6107	18.46	2.96314	B	B
298	0035860-37-8	Training	3.52855	B	2.92101	6.35089	0	0.404537	B	B
299	0036065-30-2	Training	4.33912	B	3.78347	6.03787	9.23	2.71697	notB	B
300	0036355-01-8	Prediction	3.48549	B	2.48171	6.31897	0	0.590633	B	B
301	0036437-37-3	Training	4.075	B	3.80108	6.65028	50.42	4.85826	notB	notB
302	0036483-60-0	Prediction	3.145	notB	2.91402	6.31897	9.23	2.89251	B	B
303	0036559-22-5	Training	4.535	B	2.77672	6.13773	0	0.424063	B	B
304	0036653-82-4	Prediction	3.04	notB	2.05712	5.45959	20.23	2.6434	notB	notB
305	0036734-19-7	Training	2.01923	notB	4.1385	6.43775	69.72	5.35881	notB	notB
306	0037680-66-3	Training	4.37	B	2.58847	6.04263	0	0.401451	B	B
307	0037680-73-2	Prediction	3.80692	B	2.76765	6.21661	0	0.510785	B	B
308	0038379-99-6	Training	4.78	B	2.69448	6.23245	0	0.479859	B	B
309	0038380-01-7	Training	4.86	B	2.78993	6.21661	0	0.501889	B	B
310	0038380-02-8	Training	4.86833	B	2.76765	6.22456	0	0.455466	B	B
311	0038380-03-9	Prediction	5.035	B	2.5172	6.22456	0	0.479859	B	B
312	0038380-04-0	Training	5.08	B	2.68128	6.31173	0	0.557791	B	B
313	0038380-05-1	Prediction	4.88	B	2.68128	6.31897	0	0.448762	B	B
314	0038380-07-3	Prediction	4.84667	B	2.66353	6.31173	0	0.424369	B	B
315	0038380-08-4	Prediction	5.88	B	2.72013	6.30079	0	0.533398	B	B
316	0038411-22-2	Training	4.7625	B	2.41309	6.32615	0	0.424475	B	B
317	0038411-25-5	Training	5.705	B	2.67937	6.39526	0	0.604798	B	B
318	0038444-77-8	Training	5.08	B	2.53187	6.04263	0	0.292315	B	B
319	0038444-85-8	Training	4.47	B	2.67937	6.03309	0	0.281421	B	B
320	0038444-86-9	Training	4.36	B	2.67937	6.03309	0	0.401344	B	B
321	0038444-90-5	Training	4.58	B	2.5153	6.01372	0	0.376951	B	B
322	0038640-62-9	Training	3.41188	B	3.02314	6.16752	0	0.293981	B	B
323	0039227-28-6	Training	3.4425	B	2.84535	6.54103	18.46	2.79146	B	B
324	0039227-61-7	Training	3.1075	notB	3.13582	6.47851	18.46	2.71828	B	B
325	0039485-83-1	Prediction	3.4	B	2.73333	6.22851	0	0.465483	B	B
326	0039569-21-6	Training	3.98	B	2.7899	5.85507	0	0.412544	B	B
327	0039801-14-4	Training	4.55	B	2.71369	7.39572	0	0.103994	B	B
328	0040036-79-1	Prediction	2.876	notB	2.69313	6.28972	84.84	2.5634	B	notB
329	0040186-71-8	Training	5.29	B	2.53831	6.47235	0	0.603123	B	B
330	0040186-72-9	Prediction	5.07	B	2.2713	6.53814	0	0.658919	B	B
331	0040321-76-4	Training	4.38	B	2.82878	6.46614	18.46	2.68445	B	B
332	0040766-31-2	Prediction	3.44	B	3.25615	6.0845	0	0.274907	B	B
333	0041122-70-7	Training	3.5874	B	3.63182	6.16752	23.79	2.80604	notB	notB
334	0041198-08-7	Training	1.96	notB	4.18789	6.09357	70.64	5.78509	notB	notB
335	0041464-39-5	Training	4.2425	B	2.66353	6.13773	0	0.432853	B	B
336	0041464-40-8	Prediction	4.33	B	2.77672	6.12905	0	0.424063	B	B
337	0041464-42-0	Training	4.85	B	2.86763	6.1203	0	0.417356	B	B
338	0041464-51-1	Training	4.6975	B	2.76765	6.22456	0	0.510785	B	B
339	0050876-32-9	Training	3.65	B	2.62258	5.60212	0	0.401944	B	B
340	0051207-31-9	Training	3.56484	B	2.86851	6.37502	13.14	2.51277	B	B
341	0051892-26-3	Training	3.97	B	2.69747	5.95324	9.23	2.32319	B	B
342	0051908-16-8	Training	5.31	B	2.77672	6.30079	0	0.542294	B	B
343	0052184-14-2	Training	3.685	B	3.47481	6.66058	88.09	4.68348	notB	notB
344	0052207-48-4	Training	-0.123333	notB	3.35764	5.88888	179.34	3.79831	notB	notB
345	0052663-58-8	Training	5.19	B	2.64696	6.13773	0	0.359353	B	B
346	0052663-60-2	Training	5.15	B	2.69448	6.24028	0	0.392966	B	B
347	0052663-61-3	Training	5.27	B	2.78993	6.22059	0	0.479859	B	B
348	0052663-63-5	Prediction	5.15	B	2.81104	6.31536	0	0.541741	B	B
349	0052663-69-1	Prediction	5.3125	B	2.73597	6.38856	0	0.580404	B	B
350	0052663-70-4	Training	5.26	B	2.67937	6.39526	0	0.555028	B	B
351	0052663-78-2	Prediction	5.35667	B	2.60694	6.47235	0	0.502884	B	B
352	0052712-04-6	Prediction	5.3225	B	2.77672	6.3081	0	0.557791	B	B
353	0052712-05-7	Training	5.27667	B	2.82688	6.39859	0	0.533981	B	B
354	0052744-13-5	Training	5.54	B	2.81104	6.31536	0	0.526866	B	B
355	0053469-21-9	Prediction	4.3025	B	2.77672	6.13773	0	0.424063	B	B
356	0053555-64-9	Training	4.53	B	2.72548	6.06611	0	0.43296	B	B
357	0054135-80-7	Training	3.2997	notB	3.15564	5.63835	9.23	1.76603	notB	notB
358	0054352-93-1	Prediction	3.81	B	2.6806	5.88332	0	0.410535	B	B
359	0055250-84-5	Prediction	3.47	B	4.38705	7.25488	54.71	6.2962	notB	notB
360	0055720-37-1	Training	4.43	B	2.92745	5.95324	0	0.401451	B	B
361	0056348-72-2	Training	4.16629	B	2.56619	6.1334	9.23	2.4387	B	B
362	0056558-16-8	Prediction	4.81	B	2.67674	6.24417	0	0.479966	B	B
363	0056558-17-9	Prediction	4.81	B	2.88084	6.22059	0	0.470963	B	B
364	0057055-39-7	Prediction	2.03802	notB	4.41288	6.76734	26.3	5.79639	notB	notB
365	0057117-31-4	Training	4.08	B	3.10092	6.45677	13.14	2.68445	B	B
366	0057117-41-6	Training	3.58	B	3.10092	6.4599	13.14	2.61978	B	B
367	0057117-43-8	Training	3.57	B	3.10092	6.46614	13.14	2.78296	B	B
368	0057117-44-9	Training	3.94	B	3.17757	6.53524	13.14	2.79146	B	B
369	0057465-28-8	Prediction	4.24556	B	2.56926	6.20456	0	0.455466	B	B
370	0057653-85-7	Prediction	3.22	notB	2.84535	6.54103	18.46	2.79146	B	B
371	0059039-21-3	Training	3.79	B	2.8209	6.04263	9.23	2.39637	B	B
372	0059080-33-0	Training	3.57323	B	2.53187	6.05209	0	0.490597	B	B
373	0059080-37-4	Training	4.31823	B	2.66353	6.12905	0	0.500651	B	B
374	0059722-76-8	Prediction	2.00366	notB	3.95097	6.78333	89.62	5.88473	notB	notB
375	0060123-64-0	Training	4.21	B	2.92665	6.22851	9.23	2.67505	B	B
376	0060123-65-1	Training	4.08	B	2.83535	6.22456	9.23	2.61038	B	B
377	0060145-21-3	Training	4.58	B	2.91515	6.22851	0	0.47107	B	B
378	0060851-34-5	Training	3.98	B	2.98709	6.53233	13.14	2.85614	B	B
379	0061328-45-8	Training	4.11	B	2.94684	6.13773	9.23	2.50337	B	B
380	0061328-46-9	Training	4.24	B	2.94684	6.13773	9.23	2.50337	B	B
381	0061788-32-7	Training	4.17	B	3.72757	6.20051	0	0.390727	B	B
382	0062338-09-4	Prediction	3.34	B	2.56785	5.50126	0	0.388711	B	B
383	0062796-65-0	Training	3.41667	B	2.72013	6.1506	0	0.448457	B	B
384	0064700-56-7	Prediction	0.72	notB	4.28338	6.12905	57.65	4.5695	notB	notB
385	0066332-96-5	Training	1.45837	notB	3.97721	6.45677	38.33	5.16315	notB	notB
386	0067562-39-4	Training	3.535	B	2.94439	6.6053	13.14	2.96314	B	B
387	0067905-19-5	Training	3.75	B	2.30345	7.59136	37.3	5.69172	B	B
388	0068085-85-8	Training	2.97	notB	4.29288	6.87005	59.32	5.67937	notB	notB
389	0068194-05-8	Prediction	4.18	B	2.82424	6.23245	0	0.455572	B	B
390	0068194-17-2	Prediction	5.37333	B	2.55034	6.46925	0	0.580987	B	B
391	0070124-77-5	Training	3.43	B	4.12914	6.78784	68.55	6.01058	notB	notB
392	0070362-47-9	Training	5	B	2.77672	6.13773	0	0.479383	B	B
393	0070648-26-9	Training	3.9	B	3.17757	6.53524	13.14	2.79146	B	B
394	0079538-32-2	Prediction	3.48	B	4.21073	6.80793	26.3	5.80035	notB	notB
395	0079983-71-4	Prediction	1.61	notB	4.37109	6.32615	50.94	5.20815	notB	notB
396	0080793-17-5	Training	3.41	B	2.79721	6.62141	0	4.72792	B	B
397	0080844-07-1	Prediction	3.6	B	3.75379	6.608	27.69	2.53505	B	notB
398	0083704-22-7	Prediction	3.41	B	3.3447	6.39192	13.14	2.5466	B	B
399	0092341-06-5	Prediction	3.2	notB	3.17757	6.54103	13.14	2.82529	B	B
400	0095977-29-0	Prediction	0.94	notB	4.2973	6.49375	68.65	4.61355	notB	notB
401	0097038-96-5	Training	4.97	B	2.48171	6.16331	0	0.381975	B	B
402	0100468-92-6	Training	1.86333	notB	3.87001	6.50279	63.78	5.15122	notB	notB
403	0104294-16-8	Training	3.95	B	2.87251	6.23637	9.23	2.73973	B	B
404	0110553-27-0	Prediction	1.7	notB	3.58237	6.32972	70.83	4.48566	notB	notB
405	0111158-11-3	Training	2.83	notB	3.41136	6.00881	0	0.394424	B	B
406	0120928-09-8	Training	2.71	notB	3.90776	6.49375	35.01	2.36961	B	notB
407	0123251-96-7	Prediction	0.0914286	notB	3.73452	6.65801	177.54	4.6381	notB	notB
408	0132182-92-4	Training	3.41	B	3.03145	6.65286	9.23	5.32812	B	B
409	0155569-91-8	Training	1.79333	notB	5.47848	7.65017	161.86	7.36635	notB	notB
410	0195209-93-9	Prediction	0.0517769	notB	2.75386	5.66643	52.6	4.29424	notB	notB
411	0219750-66-0	Prediction	3.37	B	2.75272	5.65249	0	0.44338	B	B
412	0250736-57-3	Prediction	1.43	notB	3.45409	6.93634	159.35	6.40059	notB	notB
413	UNK-01	Prediction	0.756667	notB	4.07243	5.87212	49.69	3.12512	notB	notB
414	UNK-02	Training	3.76	B	3.89323	6.85541	18.46	5.12433	B	B
415	UNK-05	Training	2.85	notB	3.88216	6.87005	18.46	5.19142	B	B
416	UNK-06	Training	3.92	B	3.4877	6.40192	9.23	4.81678	notB	B
417	UNK-18	Training	3.71	B	3.4877	6.39192	9.23	4.82842	notB	B

## Sheet: Table S10
Table S10 List of 962 not B chemicals in the external prediction set, identified by ID and CAS. The table lists also experimental log BCF values, a priori class (notB), values of the molecular descriptors selected by GA in the LDA model, and the predictions generated by different classification techniques.
CAS Order	CAS	SMILES	Exp_log_BCF	a priori Class	IC2	MWC4	TopoPSA	MAXDP	AD status	Pred_LDA	Pred_ANN
1	0000002-35-5	N#Cc1cc(Cl)ccc1OP(=S)(OC)OC	2.33	notB	3.67327	6.01859	93.38	3.03209	Inside-AD	notB	notB
2	0000012-51-0	Oc1ccc(cc1)C1CC(C)(CCC1C(C)C)c1ccc(cc1)O	2.12	notB	3.892	6.6107	40.46	3.61312	Inside-AD	notB	notB
3	0000013-24-1	O=C(C(O)(C)C)c1ccc(cc1)Cc1ccc(cc1)C(=O)C(O)(C)C	1.3	notB	3.43064	6.58064	74.6	5.01576	Inside-AD	notB	notB
4	0000017-62-4	COc1ccc(c(c1)S(=O)(=O)O)N=Nc1c(O)c2ccc(c(c2cc1S(=O)(=O)O)S(=O)(=O)O)N=Nc1c(cc2c(c1N)c(O)c(c(c2)S(=O)(=O)O)N=Nc1ccc2c(c1)cc(c(c2O)N=Nc1ccccc1S(=O)(=O)O)S(=O)(=O)O)S(=O)(=O)O	0.48	notB	4.49509	7.97968	634.07	6.25744	Outside-AD	notB	notB
5	0000018-35-4	CC(=C)C1CC2CC1C=C2	2.98	notB	3.52206	5.75257	0	1.02199	Inside-AD	B	B
6	0000047-09-5	OC(=O)C1CC=CCC1C(=O)N	0.54	notB	3.74095	5.69373	80.39	3.79421	Inside-AD	notB	notB
7	0000050-04-4	CC(=O)OCC(=O)C1(O)CCC2C1(C)CC(=O)C1C2CCC2=CC(=O)CCC12C	1.3	notB	4.73392	7.0184	97.74	6.47454	Inside-AD	notB	notB
8	0000050-06-6	CCC1(C(=O)NC(=O)NC1=O)c1ccccc1	0.7	notB	3.71593	6.28227	75.27	4.97579	Inside-AD	notB	notB
9	0000050-30-6	OC(=O)c1c(Cl)cccc1Cl	0.491482	notB	3.1899	5.63835	37.3	3.69494	Inside-AD	notB	notB
10	0000050-65-7	Clc1ccc(c(c1)C(=O)Nc1ccc(cc1Cl)N(=O)=O)O	2.4	notB	4.09023	6.36819	92.47	5.18952	Inside-AD	notB	notB
11	0000051-28-5	O=N(=O)c1ccc(c(c1)N(=O)=O)O	0.652339	notB	3.45482	5.80212	106.51	3.21954	Inside-AD	notB	notB
12	0000051-44-5	OC(=O)c1ccc(c(c1)Cl)Cl	0.581429	notB	3.13957	5.59471	37.3	3.49598	Inside-AD	notB	notB
13	0000051-52-5	CCCc1cc(=O)[nH]c(=S)[nH]1	1.09	notB	3.78714	5.52545	73.88	3.86297	Inside-AD	notB	notB
14	0000051-79-6	CCOC(=O)N	0.36	notB	3.02699	4.29046	52.32	2.59931	Inside-AD	notB	notB
15	0000052-68-6	COP(=O)(C(C(Cl)(Cl)Cl)O)OC	-1.27643	notB	3.10869	5.7462	65.57	4.80487	Inside-AD	notB	notB
16	0000053-70-3	c1ccc2c(c1)c1cc3ccc4c(c3cc1cc2)cccc4	2.8	notB	2.3004	6.67077	0	0.332778	Inside-AD	B	B
17	0000055-38-9	CSc1ccc(cc1C)OP(=S)(OC)OC	2.2348	notB	3.8647	6.01372	94.89	2.47259	Inside-AD	notB	notB
18	0000055-63-0	O=N(=O)OC(CON(=O)=O)CON(=O)=O	0.97	notB	2.70869	5.61677	165.15	2.83158	Outside-AD	notB	notB
19	0000056-23-5	ClC(Cl)(Cl)Cl	1.16041	notB	0.257542	4.39445	0	0.0239198	Outside-AD	B	notB
20	0000056-38-2	CCOP(=S)(Oc1ccc(cc1)N(=O)=O)OCC	2.2344	notB	3.70282	6.08904	112.73	3.54115	Inside-AD	notB	notB
21	0000056-49-5	Cc1ccc2c3c1CCc3c1c(c2)c2ccccc2cc1	3.17	notB	3.56367	6.70073	0	0.393611	Inside-AD	B	B
22	0000056-55-3	c1ccc2c(c1)cc1c(c2)ccc2c1cccc2	2.8725	notB	2.28925	6.4151	0	0.298611	Inside-AD	B	B
23	0000057-10-3	CCCCCCCCCCCCCCCC(=O)O	2.85	notB	2.30345	5.57973	37.3	3.30065	Inside-AD	notB	notB
24	0000057-15-8	CC(C(Cl)(Cl)Cl)(O)C	0.276902	notB	2.23892	5.273	20.23	3.47685	Inside-AD	notB	notB
25	0000057-63-6	C#CC1(O)CCC2C1(C)CCC1C2CCc2c1ccc(c2)O	2.29364	notB	4.46423	6.75344	40.46	4.90721	Inside-AD	notB	notB
26	0000058-73-1	CN(CCOC(c1ccccc1)c1ccccc1)C	1.25667	notB	3.31596	6.12905	12.47	2.58338	Inside-AD	B	B
27	0000058-90-2	Oc1c(Cl)cc(c(c1Cl)Cl)Cl	2.062	notB	2.93121	5.70711	20.23	3.63771	Inside-AD	notB	notB
28	0000059-50-7	Oc1ccc(c(c1)C)Cl	0.985949	notB	3.40564	5.35186	20.23	2.95568	Inside-AD	notB	notB
29	0000060-09-3	Nc1ccc(cc1)N=Nc1ccccc1	1.565	notB	2.80489	5.87212	50.74	1.56167	Inside-AD	notB	B
30	0000060-29-7	CCOCC	0.519091	notB	2.07291	3.7612	9.23	1.33333	Outside-AD	notB	notB
31	0000061-82-5	Nc1nnc[nH]1	0.0683333	notB	3.12193	4.76217	67.59	1.04861	Inside-AD	notB	notB
32	0000062-44-2	CCOc1ccc(cc1)NC(=O)C	1.08	notB	3.79622	5.63835	38.33	3.68143	Inside-AD	notB	notB
33	0000062-53-3	Nc1ccccc1	0.431723	notB	2.35275	4.89035	26.02	1.35778	Inside-AD	notB	notB
34	0000062-56-6	NC(=S)N	-0.1	notB	1.75	3.61092	84.13	0.883745	Outside-AD	notB	notB
35	0000062-73-7	COP(=O)(OC=C(Cl)Cl)OC	-0.246206	notB	2.97494	5.38907	54.57	4.3037	Inside-AD	notB	notB
36	0000065-85-0	OC(=O)c1ccccc1	0.92	notB	2.68259	5.25227	37.3	3.20093	Inside-AD	notB	notB
37	0000066-81-9	CC1CC(C)C(=O)C(C1)C(CC1CC(=O)NC(=O)C1)O	0.734286	notB	4.23976	6.34036	83.47	5.17643	Inside-AD	notB	notB
38	0000067-66-3	ClC(Cl)Cl	0.827444	notB	0.906565	3.61092	0	0.00308642	Outside-AD	notB	notB
39	0000067-68-5	CS(=O)C	0.183333	notB	1.57095	3.61092	36.28	2.75309	Outside-AD	notB	notB
40	0000067-72-1	ClC(C(Cl)(Cl)Cl)(Cl)Cl	2.41019	notB	0.811278	5.273	0	0.0345508	Outside-AD	B	B
41	0000068-12-2	O=CN(C)C	-0.1081	notB	2.12581	4.00733	20.31	2.43056	Outside-AD	notB	notB
42	0000068-22-4	C#CC1(O)CCC2C1(C)CCC1C2CCC2=CC(=O)CCC12	1.42	notB	4.28227	6.75344	37.3	4.91973	Inside-AD	notB	notB
43	0000071-36-3	CCCCO	-0.4	notB	2.92323	3.7612	20.23	2.06625	Outside-AD	notB	notB
44	0000071-43-2	c1ccccc1	1.50832	notB	1	4.57471	0	0	Outside-AD	B	notB
45	0000071-55-6	CC(Cl)(Cl)Cl	0.593232	notB	1.81128	4.39445	0	0.405607	Inside-AD	notB	notB
46	0000072-43-5	COc1ccc(cc1)C(C(Cl)(Cl)Cl)c1ccc(cc1)OC	2.92294	notB	3.27368	6.38856	18.46	1.78466	Inside-AD	B	B
47	0000072-55-9	ClC(=C(c1ccc(cc1)Cl)c1ccc(cc1)Cl)Cl	3.14417	notB	2.85429	6.19644	0	0.309341	Inside-AD	B	B
48	0000074-11-3	OC(=O)c1ccc(cc1)Cl	1.06	notB	3.10689	5.42495	37.3	3.32558	Inside-AD	notB	notB
49	0000074-31-7	c1ccc(cc1)Nc1ccc(cc1)Nc1ccccc1	3.12942	notB	2.25846	6.24028	24.06	0.8672	Inside-AD	B	B
50	0000074-97-5	ClCBr	0.458464	notB	1.45754	2.56495	0	0.147377	Outside-AD	notB	notB
51	0000075-25-2	BrC(Br)Br	1.08289	notB	0.906565	3.61092	0	0.201389	Outside-AD	notB	notB
52	0000075-64-9	CC(N)(C)C	0.655	notB	1.79474	4.39445	26.02	1.35417	Inside-AD	notB	notB
53	0000075-69-4	FC(Cl)(Cl)Cl	1.32	notB	0.906565	4.39445	0	3.90561	Outside-AD	notB	notB
54	0000075-71-8	FC(Cl)(Cl)F	0.862809	notB	1.05754	4.39445	0	3.16624	Outside-AD	notB	notB
55	0000075-98-9	OC(=O)C(C)(C)C	0.173665	notB	2.12957	4.93447	37.3	3.02083	Inside-AD	notB	notB
56	0000076-01-7	ClC(C(Cl)(Cl)Cl)Cl	1.8125	notB	2.15564	4.93447	0	0.0252915	Inside-AD	notB	notB
57	0000076-12-0	FC(C(Cl)(Cl)F)(Cl)Cl	1.71764	notB	1.5	5.273	0	4.74803	Inside-AD	notB	notB
58	0000076-13-1	FC(C(Cl)(F)F)(Cl)Cl	1.63481	notB	2.5	5.273	0	4.33213	Inside-AD	notB	notB
59	0000076-14-2	FC(C(Cl)(F)F)(Cl)F	1.49	notB	1.5	5.273	0	3.59276	Inside-AD	notB	notB
60	0000076-83-5	ClC(c1ccccc1)(c1ccccc1)c1ccccc1	2.61405	notB	2.06079	6.40192	0	0.249228	Inside-AD	B	B
61	0000076-93-7	OC(=O)C(c1ccccc1)(c1ccccc1)O	-0.124	notB	2.83284	6.20456	57.53	4.43167	Inside-AD	notB	notB
62	0000077-47-4	ClC1=C(Cl)C(C(=C1Cl)Cl)(Cl)Cl	2.1807	notB	2.55034	5.88332	0	0.331533	Inside-AD	B	B
63	0000077-73-6	C1=CC2C(C1)C1C=CC2C1	2.23872	notB	3.48171	5.93754	0	0.443287	Inside-AD	B	B
64	0000077-99-6	CCC(CO)(CO)CO	0.81	notB	2.93533	5.1985	60.69	2.65653	Inside-AD	notB	notB
65	0000078-40-0	CCOP(=O)(OCC)OCC	-0.0280979	notB	2.45799	5.36129	54.57	4.46998	Inside-AD	notB	notB
66	0000078-42-2	CCCCC(COP(=O)(OCC(CCCC)CC)OCC(CCCC)CC)CC	1.08038	notB	3.06997	6.3613	54.57	6.55251	Inside-AD	notB	notB
67	0000078-48-8	CCCCSP(=O)(SCCCC)SCCCC	3.13727	notB	2.9405	5.73334	102.78	6.24506	Inside-AD	notB	notB
68	0000078-51-3	CCCCOCCOP(=O)(OCCOCCCC)OCCOCCCC	0.639813	notB	3.18165	6.11589	82.26	5.7699	Inside-AD	notB	notB
69	0000078-59-1	CC1=CC(=O)CC(C1)(C)C	0.562378	notB	3.32393	5.60212	17.07	4.01271	Inside-AD	notB	notB
70	0000078-79-5	C=CC(=C)C	1.14063	notB	2.71929	4.00733	0	0.555556	Inside-AD	notB	notB
71	0000078-87-5	ClCC(Cl)C	0.614254	notB	2.66353	4.00733	0	0.33582	Inside-AD	notB	notB
72	0000079-00-5	ClCC(Cl)Cl	0.575591	notB	2.5	4.00733	0	0.11454	Inside-AD	notB	notB
73	0000079-01-6	ClC=C(Cl)Cl	1.07251	notB	2.25163	4.00733	0	0.392318	Inside-AD	notB	notB
74	0000079-06-1	NC(=O)C=C	0.09	notB	2.92193	4.00733	43.09	2.47222	Inside-AD	notB	notB
75	0000079-19-6	NNC(=S)N	1.105	notB	2.92193	4.00733	96.16	1.05041	Outside-AD	notB	notB
76	0000079-27-6	BrC(C(Br)Br)Br	0.749932	notB	1.5	4.46591	0	0.19393	Inside-AD	notB	notB
77	0000079-34-5	ClC(C(Cl)Cl)Cl	0.993468	notB	1.5	4.46591	0	0.00445816	Inside-AD	notB	notB
78	0000079-46-9	CC(N(=O)=O)C	0.601221	notB	2.35353	4.46591	43.14	2.50463	Inside-AD	notB	notB
79	0000079-57-2	CN(C1C(=O)C(C(=O)N)C(=O)C2(C1C(O)C1C(=C2O)C(=O)c2c(C1(C)O)cccc2O)O)C	-0.43	notB	5.17018	7.19669	198.69	6.3426	Outside-AD	notB	notB
80	0000079-92-5	C=C1C2CCC(C1(C)C)C2	2.96206	notB	3.35353	5.9108	0	1.18963	Inside-AD	B	B
81	0000080-05-7	CC(c1ccc(cc1)O)(c1ccc(cc1)O)C	1.13953	notB	3.05925	6.20051	40.46	3.2963	Inside-AD	notB	notB
82	0000080-07-9	Clc1ccc(cc1)S(=O)(=O)c1ccc(cc1)Cl	1.96	notB	2.72386	6.20051	42.52	5.43125	Inside-AD	notB	notB
83	0000080-09-1	Oc1ccc(cc1)S(=O)(=O)c1ccc(cc1)O	-0.18	notB	2.90304	6.20051	82.98	5.24128	Inside-AD	notB	notB
84	0000080-43-3	CC(c1ccccc1)(OOC(c1ccccc1)(C)C)C	2.79539	notB	2.68402	6.32615	18.46	2.23473	Inside-AD	B	B
85	0000080-51-3	NNS(=O)(=O)c1ccc(cc1)Oc1ccc(cc1)S(=O)(=O)NN	-0.02	notB	3.37162	6.48768	170.37	4.63281	Outside-AD	notB	notB
86	0000082-05-3	O=C1c2ccccc2c2c3c1cccc3ccc2	1.88629	notB	2.63846	6.49072	17.07	5.49445	Inside-AD	B	B
87	0000082-44-0	Clc1cccc2c1C(=O)c1ccccc1C2=O	2.22325	notB	2.86991	6.36819	34.14	5.3483	Inside-AD	notB	notB
88	0000082-45-1	Nc1cccc2c1C(=O)c1ccccc1C2=O	2.06128	notB	3.1652	6.36819	60.16	5.24213	Inside-AD	notB	notB
89	0000082-68-8	Clc1c(Cl)c(N(=O)=O)c(c(c1Cl)Cl)Cl	2.08659	notB	2.4956	6.02828	43.14	3.96594	Inside-AD	notB	notB
90	0000083-32-9	c1cc2cccc3c2c(c1)CC3	2.80501	notB	2.93626	6.01859	0	0.248843	Inside-AD	B	B
91	0000083-42-1	O=N(=O)c1cccc(c1C)Cl	1.99	notB	3.52806	5.62402	43.14	3.39771	Inside-AD	notB	notB
92	0000083-79-4	COc1cc2c(cc1OC)OCC1C2C(=O)c2c(O1)c1CC(Oc1cc2)C(=C)C	1.34667	notB	4.84371	6.9594	63.22	6.51707	Outside-AD	notB	notB
93	0000084-15-1	c1ccc(cc1)c1ccccc1c1ccccc1	3.20251	notB	1.9746	6.22456	0	0.178241	Inside-AD	B	B
94	0000084-47-9	O=C1c2cc(ccc2C(=O)c2c1cccc2)C(C)(C)C	2.48	notB	3.17852	6.53524	34.14	5.58047	Inside-AD	notB	notB
95	0000084-51-5	CCc1ccc2c(c1)C(=O)c1c(C2=O)cccc1	1.90146	notB	3.40152	6.39192	34.14	5.36945	Inside-AD	notB	notB
96	0000084-65-1	O=C1c2ccccc2C(=O)c2c1cccc2	2	notB	2.4183	6.286	34.14	5.1013	Inside-AD	B	notB
97	0000084-74-2	CCCCOC(=O)c1ccccc1C(=O)OCCCC	2.47869	notB	3.59447	6.08904	52.6	4.94474	Inside-AD	notB	notB
98	0000084-75-3	CCCCCCOC(=O)c1ccccc1C(=O)OCCCCCC	3.24	notB	3.46767	6.22456	52.6	5.18779	Inside-AD	notB	notB
99	0000085-22-3	CCc1c(Br)c(Br)c(c(c1Br)Br)Br	2.17512	notB	2.7744	5.92693	0	0.385485	Inside-AD	B	B
100	0000085-83-6	Cc1cc(ccc1NN=C1C(=O)C=Cc2c1cccc2)N=Nc1ccccc1C	0.75	notB	4.15423	6.7417	66.18	5.27971	Inside-AD	notB	notB
101	0000086-30-6	O=NN(c1ccccc1)c1ccccc1	1.67829	notB	2.29469	5.93754	32.67	3.78186	Inside-AD	notB	notB
102	0000086-50-0	COP(=S)(SCn1nnc2c(c1=O)cccc2)OC	1.788	notB	3.93775	6.286	127.45	5.27532	Inside-AD	notB	notB
103	0000086-73-7	c1ccc2c(c1)Cc1c2cccc1	2.80133	notB	2.69747	6.05678	0	0.217593	Inside-AD	B	B
104	0000086-74-8	c1ccc2c(c1)[nH]c1c2cccc1	2.28701	notB	2.64125	6.05678	15.79	0.877963	Inside-AD	B	B
105	0000086-87-3	OC(=O)Cc1cccc2c1cccc2	0.167617	notB	3.28658	5.9428	37.3	3.6124	Inside-AD	notB	notB
106	0000087-02-5	Nc1ccc2c(c1)cc(cc2O)S(=O)(=O)O	0.145714	notB	4.01947	6.21261	109	4.07505	Inside-AD	notB	notB
107	0000087-40-1	COc1c(Cl)cc(cc1Cl)Cl	2.85404	notB	3.03064	5.63835	9.23	1.83071	Inside-AD	notB	B
108	0000087-62-7	Cc1cccc(c1N)C	0.45	notB	2.90869	5.37064	26.02	1.68185	Inside-AD	notB	notB
109	0000087-65-0	Clc1cccc(c1O)Cl	1.2981	notB	2.87314	5.37064	20.23	3.28809	Inside-AD	notB	notB
110	0000087-68-3	ClC(=C(Cl)Cl)C(=C(Cl)Cl)Cl	2.61911	notB	1.92193	5.31321	0	0.2419	Inside-AD	B	B
111	0000087-82-1	Brc1c(Br)c(Br)c(c(c1Br)Br)Br	3.07978	notB	1	5.85507	0	0.383513	Outside-AD	B	B
112	0000087-84-3	BrC1C(Cl)C(Br)C(C(C1Br)Br)Br	2.52542	notB	2.32441	5.85507	0	0.159871	Inside-AD	B	B
113	0000088-18-6	Oc1ccccc1C(C)(C)C	1.94	notB	2.91249	5.68017	20.23	3.44613	Inside-AD	notB	notB
114	0000088-26-6	OCc1cc(c(c(c1)C(C)(C)C)O)C(C)(C)C	1.515	notB	2.90466	6.24804	40.46	4.39838	Inside-AD	notB	notB
115	0000088-30-2	Oc1ccc(c(c1)C(F)(F)F)N(=O)=O	1.1	notB	3.6416	5.97381	63.37	4.17315	Inside-AD	notB	notB
116	0000088-44-8	Cc1ccc(c(c1)S(=O)(=O)O)N	0.2	notB	3.74899	5.80212	88.77	3.82963	Inside-AD	notB	notB
117	0000088-60-8	Cc1ccc(c(c1)O)C(C)(C)C	1.965	notB	3.20757	5.80212	20.23	3.62697	Inside-AD	notB	notB
118	0000088-72-2	O=N(=O)c1ccccc1C	1.32501	notB	3.21953	5.45959	43.14	3.22731	Inside-AD	notB	notB
119	0000088-73-3	O=N(=O)c1ccccc1Cl	1.96281	notB	2.95021	5.45959	43.14	3.25349	Inside-AD	notB	notB
120	0000088-74-4	O=N(=O)c1ccccc1N	0.822256	notB	3	5.45959	69.16	3.14731	Inside-AD	notB	notB
121	0000088-85-7	CCC(c1cc(cc(c1O)N(=O)=O)N(=O)=O)C	0.983485	notB	3.97833	6.12905	106.51	3.7027	Inside-AD	notB	notB
122	0000088-89-1	O=N(=O)c1cc(N(=O)=O)c(c(c1)N(=O)=O)O	0.125556	notB	3.18137	6.07993	149.65	3.37176	Inside-AD	notB	notB
123	0000088-98-2	OC(=O)C1CC=CCC1C(=O)O	0.32	notB	3.27761	5.69373	74.6	3.57199	Inside-AD	notB	notB
124	0000089-59-8	Clc1ccc(c(c1)N(=O)=O)C	1.92	notB	3.52806	5.60947	43.14	3.39771	Inside-AD	notB	notB
125	0000089-61-2	Clc1ccc(c(c1)N(=O)=O)Cl	1.66778	notB	3.18201	5.60947	43.14	3.42389	Inside-AD	notB	notB
126	0000089-63-4	Clc1ccc(c(c1)N(=O)=O)N	1.05235	notB	3.45282	5.60947	69.16	3.31771	Inside-AD	notB	notB
127	0000089-69-0	Clc1cc(N(=O)=O)c(cc1Cl)Cl	1.73805	notB	3.18201	5.75257	43.14	3.54854	Inside-AD	notB	notB
128	0000089-83-8	Cc1ccc(c(c1)O)C(C)C	1.48	notB	3.48307	5.60947	20.23	3.46176	Inside-AD	notB	notB
129	0000089-93-0	NCc1ccccc1C	0.956657	notB	3.28418	5.2832	26.02	1.45065	Inside-AD	notB	notB
130	0000090-12-0	Cc1cccc2c1cccc2	2.544	notB	2.77726	5.72685	0	0.157407	Inside-AD	B	B
131	0000090-13-1	Clc1cccc2c1cccc2	2.63	notB	2.36957	5.72685	0	0.213906	Inside-AD	B	B
132	0000090-30-2	c1ccc(cc1)Nc1cccc2c1cccc2	3.29177	notB	2.63892	6.17587	12.03	0.946898	Inside-AD	B	B
133	0000090-41-5	Nc1ccccc1c1ccccc1	1.55145	notB	2.63105	5.826	26.02	1.85258	Inside-AD	B	notB
134	0000090-51-7	Nc1ccc2c(c1)c(O)cc(c2)S(=O)(=O)O	0.207762	notB	4.01947	6.21261	109	4.06362	Inside-AD	notB	notB
135	0000090-94-8	CN(c1ccc(cc1)C(=O)c1ccc(cc1)N(C)C)C	1.55698	notB	2.89644	6.29342	23.55	5.3814	Inside-AD	notB	notB
136	0000091-15-6	N#Cc1ccccc1C#N	0.385367	notB	2.52164	5.39816	47.58	2.44843	Inside-AD	notB	notB
137	0000091-20-3	c1ccc2c(c1)cccc2	2.05883	notB	1.83659	5.57215	0	0.12037	Inside-AD	B	B
138	0000091-23-6	COc1ccccc1N(=O)=O	0.76626	notB	3.35021	5.55683	52.37	3.3062	Inside-AD	notB	notB
139	0000091-53-2	CCOc1ccc2c(c1)C(=CC(N2)(C)C)C	1.84	notB	3.92817	6.18415	21.26	2.01724	Inside-AD	notB	notB
140	0000091-57-6	Cc1ccc2c(c1)cccc2	3.19057	notB	2.81321	5.70711	0	0.203704	Inside-AD	B	notB
141	0000091-63-4	Cc1ccc2c(n1)cccc2	0.48	notB	3.10869	5.70711	12.89	1.37565	Inside-AD	B	notB
142	0000091-66-7	CCN(c1ccccc1)CC	2.0152	notB	2.93604	5.46806	3.24	0.333333	Inside-AD	B	notB
143	0000091-96-3	O=C(Nc1ccc(cc1C)c1ccc(c(c1)C)NC(=O)CC(=O)C)CC(=O)C	-0.175	notB	3.84411	6.6053	92.34	4.77958	Inside-AD	notB	notB
144	0000092-24-0	c1ccc2c(c1)cc1c(c2)cc2c(c1)cccc2	2.41	notB	2.15591	6.40192	0	0.274907	Inside-AD	B	B
145	0000092-69-3	Oc1ccc(cc1)c1ccccc1	1.65911	notB	2.55468	5.80212	20.23	3.10357	Inside-AD	notB	notB
146	0000092-70-6	OC(=O)c1cc2ccccc2cc1O	0.366667	notB	3.39081	6.00389	57.53	3.70545	Inside-AD	notB	notB
147	0000092-77-3	O=C(c1cc2ccccc2cc1O)Nc1ccccc1	0.720073	notB	3.35762	6.35784	49.33	5.20749	Inside-AD	notB	notB
148	0000092-84-2	c1ccc2c(c1)Sc1c(N2)cccc1	2.65049	notB	2.78443	6.07074	37.33	0.993704	Inside-AD	B	B
149	0000092-87-5	Nc1ccc(cc1)c1ccc(cc1)N	1.84167	notB	2.62352	5.90536	52.04	1.60887	Inside-AD	B	B
150	0000093-46-9	c1ccc2c(c1)cc(cc2)Nc1ccc(cc1)Nc1ccc2c(c1)cccc2	3.28	notB	2.75	6.74406	24.06	0.983533	Inside-AD	B	B
151	0000093-76-5	OC(=O)COc1cc(Cl)c(cc1Cl)Cl	0.998182	notB	3.68188	5.83188	46.53	3.34244	Inside-AD	notB	notB
152	0000094-74-6	OC(=O)COc1ccc(cc1C)Cl	0.406667	notB	3.93626	5.70044	46.53	3.23394	Inside-AD	notB	notB
153	0000094-75-7	OC(=O)COc1ccc(cc1Cl)Cl	1.18	notB	3.68188	5.70044	46.53	3.24729	Inside-AD	notB	notB
154	0000095-14-7	c1ccc2c(c1)n[nH]n2	0.83	notB	2.6645	5.50939	41.57	0.882593	Inside-AD	notB	B
155	0000095-16-9	c1ccc2c(c1)scn2	0.746148	notB	2.95021	5.50939	41.13	1.26891	Inside-AD	notB	notB
156	0000095-47-6	Cc1ccccc1C	1.18	notB	2.41938	5.15329	0	0.12037	Inside-AD	B	notB
157	0000095-48-7	Cc1ccccc1O	1.03	notB	3.07782	5.15329	20.23	2.91926	Inside-AD	notB	notB
158	0000095-49-8	Cc1ccccc1Cl	1.89148	notB	2.7899	5.15329	0	0.193073	Inside-AD	notB	notB
159	0000095-50-1	Clc1ccccc1Cl	2.48292	notB	1.9183	5.15329	0	0.233968	Inside-AD	B	B
160	0000095-51-2	Nc1ccccc1Cl	0.840592	notB	2.80735	5.15329	26.02	1.56071	Inside-AD	notB	notB
161	0000095-53-4	Cc1ccccc1N	0.44	notB	3.10188	5.15329	26.02	1.51981	Inside-AD	notB	notB
162	0000095-56-7	Oc1ccccc1Br	1.60582	notB	2.77736	5.15329	20.23	2.97771	Inside-AD	notB	notB
163	0000095-57-8	Oc1ccccc1Cl	1.55629	notB	2.77736	5.15329	20.23	2.96015	Inside-AD	notB	notB
164	0000095-63-6	Cc1ccc(c(c1)C)C	2.21531	notB	2.39046	5.35186	0	0.203704	Inside-AD	B	notB
165	0000095-68-1	Cc1ccc(c(c1)C)N	0.815	notB	3.10869	5.35186	26.02	1.5887	Inside-AD	notB	notB
166	0000095-69-2	Clc1ccc(c(c1)C)N	1.43503	notB	3.41042	5.35186	26.02	1.60688	Inside-AD	notB	notB
167	0000095-73-8	Clc1ccc(c(c1)Cl)C	2.95	notB	3.00624	5.35186	0	0.349108	Inside-AD	notB	B
168	0000095-76-1	Nc1ccc(c(c1)Cl)Cl	1.26683	notB	2.84237	5.35186	26.02	1.57185	Inside-AD	notB	notB
169	0000095-77-2	Oc1ccc(c(c1)Cl)Cl	1.71209	notB	2.81507	5.35186	20.23	2.98185	Inside-AD	notB	notB
170	0000095-78-3	Cc1ccc(c(c1)N)C	0.805702	notB	3.00869	5.35186	26.02	1.62065	Inside-AD	notB	notB
171	0000095-82-9	Clc1ccc(c(c1)N)Cl	1.31974	notB	3.03915	5.35186	26.02	1.68772	Inside-AD	notB	notB
172	0000095-95-4	Clc1cc(Cl)c(cc1O)Cl	2.27692	notB	3.02699	5.53339	20.23	3.30978	Inside-AD	notB	notB
173	0000096-12-8	ClCC(CBr)Br	1.28306	notB	2.91398	4.31749	0	0.208462	Inside-AD	notB	notB
174	0000096-18-4	ClCC(CCl)Cl	1.02525	notB	2.36852	4.31749	0	0.107039	Inside-AD	notB	notB
175	0000096-29-7	CC(=NO)CC	0.369687	notB	3.13957	4.31749	32.59	1.92273	Inside-AD	notB	notB
176	0000096-45-7	S=C1NCCN1	-0.0301058	notB	2.4183	4.76217	56.15	0.703189	Inside-AD	notB	notB
177	0000096-50-4	Nc1nccs1	0.065	notB	2.92193	4.76217	67.15	1.31687	Inside-AD	notB	notB
178	0000096-76-4	Oc1ccc(cc1C(C)(C)C)C(C)(C)C	2.49107	notB	2.57909	6.09807	20.23	3.83631	Inside-AD	B	notB
179	0000096-91-3	O=N(=O)c1cc(N)c(c(c1)N(=O)=O)O	0.355	notB	3.47135	5.92693	132.53	3.3162	Inside-AD	notB	notB
180	0000096-96-8	COc1ccc(c(c1)N(=O)=O)N	0.752658	notB	3.64644	5.68698	78.39	3.35991	Inside-AD	notB	notB
181	0000097-00-7	O=N(=O)c1ccc(c(c1)N(=O)=O)Cl	1.13	notB	3.20282	5.80212	86.28	3.40571	Inside-AD	notB	notB
182	0000097-02-9	O=N(=O)c1ccc(c(c1)N(=O)=O)N	1.11	notB	3.19716	5.80212	112.3	3.29954	Inside-AD	notB	notB
183	0000097-23-4	Oc1ccc(cc1Cc1cc(Cl)ccc1O)Cl	2.1106	notB	3.43971	6.14204	40.46	3.80324	Inside-AD	notB	notB
184	0000097-77-8	CCN(C(=S)SSC(=S)N(CC)CC)CC	2.35	notB	2.6416	5.76519	121.26	0.699508	Inside-AD	notB	notB
185	0000098-08-8	FC(c1ccccc1)(F)F	1.64931	notB	2.3656	5.50939	0	3.78787	Inside-AD	notB	notB
186	0000098-10-2	NS(=O)(=O)c1ccccc1	0.409997	notB	2.7719	5.50939	68.54	3.7588	Inside-AD	notB	notB
187	0000098-15-7	Clc1cccc(c1)C(F)(F)F	2.08805	notB	2.92323	5.65249	0	3.98605	Inside-AD	notB	notB
188	0000098-47-5	O=N(=O)c1cccc(c1)S(=O)(=O)O	0.7	notB	3.61437	5.83773	105.89	3.6888	Inside-AD	notB	notB
189	0000098-54-4	CC(c1ccc(cc1)O)(C)C	1.80248	notB	2.83249	5.64545	20.23	3.0224	Inside-AD	notB	notB
190	0000098-56-6	FC(c1ccc(cc1)Cl)(F)F	2.21	notB	2.7899	5.64545	0	3.93293	Inside-AD	notB	notB
191	0000098-73-7	OC(=O)c1ccc(cc1)C(C)(C)C	0.43131	notB	3.07769	5.83188	37.3	3.56191	Inside-AD	notB	notB
192	0000098-81-7	BrC(=C)c1ccccc1	2.19	notB	2.72722	5.25227	0	0.92928	Inside-AD	notB	B
193	0000098-82-8	CC(c1ccccc1)C	1.55	notB	2.68402	5.25227	0	0.203704	Inside-AD	B	notB
194	0000098-83-9	CC(=C)c1ccccc1	1.85604	notB	2.92585	5.25227	0	0.82537	Inside-AD	notB	B
195	0000098-84-0	CC(c1ccccc1)N	0.685	notB	3.06596	5.25227	26.02	1.6137	Inside-AD	notB	notB
196	0000098-95-3	O=N(=O)c1ccccc1	0.658806	notB	2.4956	5.25227	43.14	3.00648	Inside-AD	notB	notB
197	0000099-08-1	Cc1cccc(c1)N(=O)=O	0.981287	notB	3.33718	5.43372	43.14	3.1587	Inside-AD	notB	notB
198	0000099-09-2	Nc1cccc(c1)N(=O)=O	0.688166	notB	3.125	5.43372	69.16	3.10315	Inside-AD	notB	notB
199	0000099-54-7	O=N(=O)c1ccc(c(c1)Cl)Cl	1.98282	notB	2.98523	5.59471	43.14	3.30153	Inside-AD	notB	notB
200	0000099-62-7	CC(c1cccc(c1)C(C)C)C	2.94705	notB	2.67291	5.65948	0	0.314815	Inside-AD	B	B
201	0000099-64-9	CN(c1cccc(c1)C(=O)O)C	1.105	notB	3.41444	5.65948	40.54	3.55723	Inside-AD	notB	notB
202	0000099-65-0	O=N(=O)c1cccc(c1)N(=O)=O	0.771545	notB	2.875	5.65948	86.28	3.1587	Inside-AD	notB	notB
203	0000099-71-8	CCC(c1ccc(cc1)O)C	1.41362	notB	3.46347	5.51745	20.23	3.01115	Inside-AD	notB	notB
204	0000099-99-0	Cc1ccc(cc1)N(=O)=O	0.970512	notB	3.10188	5.42495	43.14	3.11778	Inside-AD	notB	notB
205	0000100-00-5	Clc1ccc(cc1)N(=O)=O	1.7452	notB	2.95021	5.42495	43.14	3.13114	Inside-AD	notB	notB
206	0000100-01-6	Nc1ccc(cc1)N(=O)=O	0.685875	notB	2.75	5.42495	69.16	3.07697	Inside-AD	notB	notB
207	0000100-02-7	Oc1ccc(cc1)N(=O)=O	1.00581	notB	3.10689	5.42495	63.37	3.03615	Inside-AD	notB	notB
208	0000100-17-4	COc1ccc(cc1)N(=O)=O	1.0479	notB	3.2391	5.51745	52.37	3.16529	Inside-AD	notB	notB
209	0000100-26-5	OC(=O)c1ccc(cn1)C(=O)O	0.710175	notB	3.61687	5.65249	87.49	3.29465	Inside-AD	notB	notB
210	0000100-37-8	OCCN(CC)CC	0.29	notB	2.91402	4.74493	23.47	2.45722	Inside-AD	notB	notB
211	0000100-41-4	CCc1ccccc1	1.19	notB	2.7744	5.04343	0	0.162037	Inside-AD	notB	notB
212	0000100-42-5	C=Cc1ccccc1	1.13	notB	2.72722	5.04343	0	0.630926	Inside-AD	notB	notB
213	0000100-43-6	C=Cc1ccncc1	1.92131	notB	3.24022	5.04343	12.89	0.845556	Inside-AD	notB	notB
214	0000100-61-8	CNc1ccccc1	0.70732	notB	2.7275	5.04343	12.03	0.526944	Inside-AD	notB	notB
215	0000100-66-3	COc1ccccc1	1.34	notB	2.55504	5.04343	9.23	1.41417	Inside-AD	notB	notB
216	0000101-02-0	c1ccc(cc1)OP(Oc1ccccc1)Oc1ccccc1	2.39223	notB	2.17831	6.30445	41.28	2.50732	Inside-AD	B	B
217	0000101-14-4	Nc1ccc(cc1Cl)Cc1ccc(c(c1)Cl)N	2.38047	notB	3.28868	6.1334	52.04	1.85698	Inside-AD	notB	B
218	0000101-53-1	Oc1ccc(cc1)Cc1ccccc1	1.46647	notB	2.88182	5.83188	20.23	3.12276	Inside-AD	notB	notB
219	0000101-61-1	CN(c1ccc(cc1)Cc1ccc(cc1)N(C)C)C	2.74	notB	2.94244	6.20051	6.48	0.203562	Inside-AD	B	B
220	0000101-67-7	CCCCCCCCc1ccc(cc1)Nc1ccc(cc1)CCCCCCCC	0.705	notB	3.25952	6.42487	12.03	1.0392	Inside-AD	B	B
221	0000101-68-8	O=C=Nc1ccc(cc1)Cc1ccc(cc1)N=C=O	2.35	notB	3.06488	6.12468	58.86	3.10749	Inside-AD	notB	notB
222	0000101-70-2	COc1ccc(cc1)Nc1ccc(cc1)OC	1.885	notB	3.01532	6.04263	30.49	1.60535	Inside-AD	B	B
223	0000101-77-9	Nc1ccc(cc1)Cc1ccc(cc1)N	1.04535	notB	2.92695	5.93225	52.04	1.62339	Inside-AD	notB	B
224	0000101-81-5	c1ccc(cc1)Cc1ccccc1	2.98731	notB	2.21469	5.72031	0	0.159722	Inside-AD	B	B
225	0000101-84-8	c1ccc(cc1)Oc1ccccc1	2.61861	notB	1.97012	5.72031	9.23	2.07833	Inside-AD	B	B
226	0000102-70-5	C=CCN(CC=C)CC=C	0.687182	notB	2.64229	5.01728	3.24	0.654722	Inside-AD	notB	notB
227	0000102-71-6	OCCN(CCO)CCO	0.0975	notB	2.64229	5.01728	63.93	2.485	Inside-AD	notB	notB
228	0000102-81-8	CCCCN(CCCC)CCO	1.145	notB	3.27158	5.20949	23.47	2.79367	Inside-AD	notB	notB
229	0000102-82-9	CCCCN(CCCC)CCCC	1.32132	notB	2.66997	5.2933	3.24	0.635417	Inside-AD	notB	B
230	0000103-23-1	CCCCC(COC(=O)CCCCC(=O)OCC(CCCC)CC)CC	1.43	notB	3.41896	6.15486	52.6	4.79776	Inside-AD	notB	notB
231	0000103-44-6	CCCCC(COC=C)CC	3.00574	notB	3.42162	5.10595	9.23	1.64746	Inside-AD	notB	notB
232	0000103-50-4	O(Cc1ccccc1)Cc1ccccc1	2.50336	notB	2.48801	5.81413	9.23	2.10574	Inside-AD	B	B
233	0000103-64-0	BrC=Cc1ccccc1	2.265	notB	2.85222	5.15329	0	0.270833	Inside-AD	notB	notB
234	0000103-69-5	CCNc1ccccc1	1.01171	notB	3.06596	5.15329	12.03	0.7075	Inside-AD	notB	notB
235	0000103-83-3	CN(Cc1ccccc1)C	0.952191	notB	2.87685	5.32301	3.24	0.162037	Inside-AD	B	notB
236	0000104-40-5	CCCCCCCCCc1ccc(cc1)O	2.52984	notB	3.23024	5.72031	20.23	3.14874	Inside-AD	notB	notB
237	0000104-43-8	CCCCCCCCCCCCc1ccc(cc1)O	2.672	notB	2.97811	5.86647	20.23	3.20271	Inside-AD	notB	notB
238	0000104-88-1	O=Cc1ccc(cc1)Cl	0.742628	notB	2.95021	5.25227	17.07	3.13114	Inside-AD	notB	notB
239	0000105-05-5	CCc1ccc(cc1)CC	2.46865	notB	2.68872	5.36129	0	0.207176	Inside-AD	B	notB
240	0000105-06-6	C=Cc1ccc(cc1)C=C	2.48	notB	2.72193	5.36129	0	0.660593	Inside-AD	B	B
241	0000105-67-9	Cc1ccc(c(c1)C)O	1.95	notB	3.0761	5.35186	20.23	3.0437	Inside-AD	notB	notB
242	0000106-37-6	Brc1ccc(cc1)Br	2.16255	notB	1.9183	5.1299	0	0.282729	Inside-AD	B	B
243	0000106-42-3	Cc1ccc(cc1)C	1.20333	notB	2.19716	5.1299	0	0.12037	Inside-AD	B	notB
244	0000106-43-4	Cc1ccc(cc1)Cl	1.74157	notB	2.7899	5.1299	0	0.193073	Inside-AD	notB	notB
245	0000106-46-7	Clc1ccc(cc1)Cl	2.31632	notB	1.9183	5.1299	0	0.233968	Inside-AD	B	B
246	0000106-47-8	Nc1ccc(cc1)Cl	0.562076	notB	2.80735	5.1299	26.02	1.44484	Inside-AD	notB	notB
247	0000106-48-9	Oc1ccc(cc1)Cl	1.34273	notB	2.77736	5.1299	20.23	2.77484	Inside-AD	notB	notB
248	0000106-49-0	Cc1ccc(cc1)N	0.61	notB	2.98423	5.1299	26.02	1.42667	Inside-AD	notB	notB
249	0000106-50-3	Nc1ccc(cc1)N	1.805	notB	2.25	5.1299	52.04	1.37111	Inside-AD	notB	notB
250	0000106-93-4	BrCCBr	0.608058	notB	1.5	3.29584	0	0.15715	Outside-AD	notB	notB
251	0000107-02-8	C=CC=O	2.54	notB	2.75	3.29584	17.07	2.05556	Outside-AD	notB	notB
252	0000107-05-1	ClCC=C	0.353257	notB	2.72548	3.29584	0	0.520062	Outside-AD	notB	notB
253	0000107-06-2	ClCCCl	0.3	notB	1.5	3.29584	0	0.055727	Outside-AD	notB	notB
254	0000107-13-1	C=CC#N	1.5	notB	2.52164	3.29584	23.79	1.50694	Outside-AD	notB	notB
255	0000107-21-1	OCCO	-0.5	notB	1.92193	3.29584	40.46	1.625	Outside-AD	notB	notB
256	0000107-66-4	CCCCOP(=O)(OCCCC)O	0.426667	notB	3.20282	5.44242	65.57	4.19809	Inside-AD	notB	notB
257	0000108-36-1	Brc1cccc(c1)Br	2.29667	notB	2.18872	5.14166	0	0.374486	Inside-AD	B	B
258	0000108-42-9	Nc1cccc(c1)Cl	0.328571	notB	2.95021	5.14166	26.02	1.48478	Inside-AD	notB	notB
259	0000108-43-0	Oc1cccc(c1)Cl	1.11381	notB	2.93121	5.14166	20.23	2.83923	Inside-AD	notB	notB
260	0000108-45-2	Nc1cccc(c1)N	0.800508	notB	2.625	5.14166	52.04	1.37861	Inside-AD	notB	notB
261	0000108-57-6	C=Cc1cccc(c1)C=C	2.54	notB	3.02193	5.37064	0	0.672037	Inside-AD	notB	B
262	0000108-60-1	ClCC(OC(CCl)C)C	0.6973	notB	2.60614	4.97673	9.23	2.1304	Inside-AD	notB	notB
263	0000108-67-8	Cc1cc(C)cc(c1)C	2.40398	notB	2.12809	5.35186	0	0.1875	Inside-AD	B	B
264	0000108-78-1	Nc1nc(N)nc(n1)N	0.18	notB	1.92193	5.35186	116.73	1.13722	Inside-AD	notB	notB
265	0000108-80-5	O=c1[nH]c(=O)[nH]c(=O)[nH]1	-0.65	notB	1.58496	5.35186	88.29	3.04889	Inside-AD	notB	notB
266	0000108-86-1	Brc1ccccc1	1.49272	notB	1.78416	4.89035	0	0.187243	Inside-AD	B	notB
267	0000108-90-7	Clc1ccccc1	1.71093	notB	1.78416	4.89035	0	0.156036	Inside-AD	B	notB
268	0000108-95-2	Oc1ccccc1	1.35143	notB	2.28778	4.89035	20.23	2.63222	Inside-AD	notB	notB
269	0000109-02-4	CN1CCOCC1	1	notB	2.79465	4.89035	12.47	1.59819	Inside-AD	notB	notB
270	0000109-06-8	Cc1ccccn1	0.49	notB	3.12809	4.89035	12.89	0.979167	Inside-AD	notB	notB
271	0000109-09-1	Clc1ccccn1	1.41571	notB	2.84535	4.89035	12.89	1.05187	Inside-AD	notB	notB
272	0000109-69-3	CCCCCl	1.2148	notB	2.61058	3.7612	0	0.237978	Outside-AD	notB	notB
273	0000109-70-6	ClCCCBr	0.72	notB	2.73216	3.7612	0	0.118441	Outside-AD	notB	notB
274	0000110-02-1	c1cccs1	0.737535	notB	2.28104	4.39445	28.24	0.337963	Inside-AD	notB	notB
275	0000110-16-7	OC(=O)C=CC(=O)O	1	notB	2.58496	4.77912	74.6	2.55361	Inside-AD	notB	notB
276	0000110-30-5	CCCCCCCCCCCCCCCCCC(=O)NCCNC(=O)CCCCCCCCCCCCCCCCC	0.393333	notB	2.42387	6.51471	58.2	5.02662	Inside-AD	B	notB
277	0000110-81-6	CCSSCC	1.69	notB	2.15564	4.07754	50.6	0.379697	Inside-AD	notB	notB
278	0000110-82-7	C1CCCCC1	1.95877	notB	0.918296	4.57471	0	0	Outside-AD	B	notB
279	0000110-83-8	C1CCC=CC1	1.615	notB	2.5	4.57471	0	0.267361	Inside-AD	notB	notB
280	0000110-91-8	C1CNCCO1	0.0726029	notB	2.57356	4.57471	21.26	1.50694	Inside-AD	notB	notB
281	0000110-98-5	CC(COCC(O)C)O	0.392743	notB	2.97966	4.90527	49.69	2.65862	Inside-AD	notB	notB
282	0000111-27-3	CCCCCCO	-0.272	notB	2.83256	4.31749	20.23	2.29288	Inside-AD	notB	notB
283	0000111-40-0	NCCNCCN	0.383215	notB	2.42193	4.31749	64.07	1.16597	Inside-AD	notB	notB
284	0000111-41-1	NCCNCCO	0.0761066	notB	3.2211	4.31749	58.28	2.18957	Inside-AD	notB	notB
285	0000111-76-2	CCCCOCCO	-0.22	notB	3.17467	4.51086	29.46	2.24059	Inside-AD	notB	notB
286	0000111-84-2	CCCCCCCCC	3.15	notB	1.94686	4.67283	0	0.263711	Inside-AD	notB	notB
287	0000111-94-4	N#CCCNCCC#N	-0.262433	notB	2.83659	4.67283	59.61	2.06777	Inside-AD	notB	notB
288	0000112-40-3	CCCCCCCCCCCC	2.53837	notB	1.82823	5.04343	0	0.279016	Inside-AD	B	B
289	0000113-00-8	NC(=N)N	-1	notB	2.05881	3.61092	75.89	1.05556	Outside-AD	notB	notB
290	0000115-28-6	OC(=O)C1C(C(=O)O)C2(C(C1(Cl)C(=C2Cl)Cl)(Cl)Cl)Cl	-0.072	notB	3.56704	6.73221	74.6	4.82003	Inside-AD	notB	notB
291	0000115-29-7	O=S1OCC2C(CO1)C1(C(C2(Cl)C(=C1Cl)Cl)(Cl)Cl)Cl	2.29561	notB	3.60386	6.74406	54.74	4.79925	Inside-AD	notB	notB
292	0000115-86-6	O=P(Oc1ccccc1)(Oc1ccccc1)Oc1ccccc1	2.62769	notB	2.29655	6.42162	54.57	6.17819	Inside-AD	notB	notB
293	0000115-96-8	ClCCOP(=O)(OCCCl)OCCCl	0.143229	notB	2.77586	5.56452	54.57	5.00118	Inside-AD	notB	notB
294	0000117-18-0	Clc1cc(Cl)c(c(c1Cl)N(=O)=O)Cl	3.0068	notB	2.95021	5.90536	43.14	3.84129	Inside-AD	notB	notB
295	0000117-79-3	Nc1ccc2c(c1)C(=O)c1c(C2=O)cccc1	1.92824	notB	3.14635	6.35437	60.16	5.19796	Inside-AD	notB	notB
296	0000117-81-7	CCCCC(COC(=O)c1ccccc1C(=O)OCC(CCCC)CC)CC	2.1692	notB	3.6047	6.43133	52.6	5.56978	Inside-AD	notB	notB
297	0000117-84-0	CCCCCCCCOC(=O)c1ccccc1C(=O)OCCCCCCCC	2.66667	notB	3.23305	6.34388	52.6	5.35181	Inside-AD	notB	notB
298	0000118-44-5	CCNc1cccc2c1cccc2	2.54579	notB	3.31905	5.85507	12.03	0.850509	Inside-AD	B	notB
299	0000118-69-4	Clc1cccc(c1C)Cl	2.835	notB	2.87291	5.37064	0	0.240079	Inside-AD	B	notB
300	0000118-83-2	Clc1ccc(c(c1)C(F)(F)F)N(=O)=O	2.42914	notB	3.52806	5.97381	43.14	4.30243	Inside-AD	notB	notB
301	0000118-91-2	OC(=O)c1ccccc1Cl	0.6	notB	3.10689	5.45959	37.3	3.44793	Inside-AD	notB	notB
302	0000118-96-7	O=N(=O)c1cc(N(=O)=O)c(c(c1)N(=O)=O)C	0.643	notB	3.20091	6.07993	129.42	3.53176	Inside-AD	notB	notB
303	0000119-06-2	CCCCCCCCCCCCCOC(=O)c1ccccc1C(=O)OCCCCCCCCCCCCC	1.17	notB	2.7643	6.59167	52.6	5.59706	Inside-AD	notB	notB
304	0000119-12-0	CCOP(=S)(Oc1ccc(=O)n(n1)c1ccccc1)OCC	1.53262	notB	4.00657	6.38182	99.02	5.00145	Inside-AD	notB	notB
305	0000119-33-5	Cc1ccc(c(c1)N(=O)=O)O	1.61345	notB	3.6416	5.60947	63.37	3.21954	Inside-AD	notB	notB
306	0000119-47-1	Cc1cc(Cc2cc(C)cc(c2O)C(C)(C)C)c(c(c1)C(C)(C)C)O	2.3698	notB	3.37538	6.67582	40.46	4.81792	Inside-AD	notB	notB
307	0000119-56-2	Clc1ccc(cc1)C(c1ccccc1)O	1.6869	notB	2.83393	5.96358	20.23	4.0961	Inside-AD	notB	notB
308	0000119-61-9	O=C(c1ccccc1)c1ccccc1	0.934123	notB	2.13792	5.86647	17.07	4.8463	Inside-AD	notB	B
309	0000119-93-7	Nc1ccc(cc1C)c1ccc(c(c1)C)N	1.61244	notB	3.28064	6.11147	52.04	1.8008	Inside-AD	notB	B
310	0000120-12-7	c1ccc2c(c1)cc1c(c2)cccc1	3.03433	notB	2.11749	6.07074	0	0.240741	Inside-AD	B	B
311	0000120-52-5	O=C(c1ccccc1)ON=C1C=CC(=NOC(=O)c2ccccc2)C=C1	0.495126	notB	3.2037	6.48768	77.32	4.80514	Inside-AD	notB	notB
312	0000120-71-8	COc1ccc(cc1N)C	0.917	notB	3.61781	5.45959	35.25	1.6069	Inside-AD	notB	notB
313	0000120-78-5	c1ccc2c(c1)sc(n2)SSc1nc2c(s1)cccc2	1.19598	notB	2.95021	6.44095	132.86	1.98958	Inside-AD	notB	notB
314	0000120-82-1	Clc1ccc(c(c1)Cl)Cl	2.94404	notB	2.12581	5.35186	0	0.390003	Inside-AD	B	B
315	0000120-95-6	CCC(c1ccc(c(c1)C(CC)(C)C)O)(C)C	2.63	notB	3.05851	6.20859	20.23	4.04013	Inside-AD	notB	notB
316	0000121-14-2	O=N(=O)c1ccc(c(c1)N(=O)=O)C	0.852343	notB	3.43162	5.80212	86.28	3.37954	Inside-AD	notB	notB
317	0000121-44-8	CCN(CC)CC	0.196	notB	2.02539	4.57471	3.24	0.375	Inside-AD	notB	notB
318	0000121-57-3	Nc1ccc(cc1)S(=O)(=O)O	0.035	notB	3.28104	5.64545	88.77	3.60706	Inside-AD	notB	notB
319	0000121-69-7	CN(c1ccccc1)C	0.96557	notB	2.52821	5.25227	3.24	0.0833333	Inside-AD	B	notB
320	0000121-73-3	Clc1cccc(c1)N(=O)=O	1.94907	notB	3.09307	5.43372	43.14	3.17688	Inside-AD	notB	notB
321	0000121-82-4	O=N(=O)N1CN(CN(C1)N(=O)=O)N(=O)=O	0.530465	notB	2.52164	5.95324	139.14	3.32361	Inside-AD	notB	notB
322	0000121-86-8	O=N(=O)c1ccc(c(c1)Cl)C	1.69	notB	3.41042	5.59471	43.14	3.28818	Inside-AD	notB	notB
323	0000121-92-6	OC(=O)c1cccc(c1)N(=O)=O	0.45	notB	3.61687	5.65948	80.44	3.35315	Inside-AD	notB	notB
324	0000122-14-5	COP(=S)(Oc1ccc(c(c1)C)N(=O)=O)OC	1.82705	notB	3.85731	6.10256	112.73	3.66934	Inside-AD	notB	notB
325	0000122-34-9	CCNc1nc(NCC)nc(n1)Cl	1.48934	notB	3.22347	5.67332	62.73	1.20519	Inside-AD	notB	notB
326	0000122-39-4	c1ccc(cc1)Nc1ccccc1	2.007	notB	2.13792	5.72031	12.03	0.803889	Inside-AD	B	B
327	0000122-80-5	CC(=O)Nc1ccc(cc1)N	0.355	notB	3.30875	5.4848	55.12	3.55572	Inside-AD	notB	notB
328	0000123-30-8	Nc1ccc(cc1)O	1.625	notB	2.97356	5.1299	46.25	2.70111	Inside-AD	notB	notB
329	0000123-31-9	Oc1ccc(cc1)O	1.585	notB	2.23593	5.1299	40.46	2.64556	Inside-AD	notB	notB
330	0000123-33-1	O=c1ccc(=O)[nH][nH]1	-0.2	notB	2.32193	5.1299	58.86	3.10917	Inside-AD	notB	notB
331	0000123-48-8	CC(=CC(C)(C)C)CC(C)(C)C	3.29	notB	2.63317	5.63121	0	0.373264	Inside-AD	B	B
332	0000123-63-7	CC1OC(C)OC(O1)C	0.04625	notB	2.12809	5.35186	27.69	1.61208	Inside-AD	notB	notB
333	0000123-91-1	O1CCOCC1	-0.272257	notB	1.37878	4.57471	18.46	1.44444	Inside-AD	notB	notB
334	0000124-64-1	OCP(CO)(CO)CO	1.97	notB	2.1066	5.1985	80.92	2.60078	Inside-AD	notB	notB
335	0000124-73-2	FC(C(Br)(F)F)(Br)F	1.565	notB	1.5	5.273	0	3.64153	Inside-AD	notB	notB
336	0000126-30-7	OCC(CO)(C)C	0.230541	notB	2.58952	4.84419	40.46	2.43403	Inside-AD	notB	notB
337	0000126-33-0	O=S1(=O)CCCC1	0.581429	notB	2.44022	5.15329	42.52	3.5787	Inside-AD	notB	notB
338	0000126-58-9	OCC(COCC(CO)(CO)CO)(CO)CO	0.31	notB	2.34875	5.96871	130.61	3.0294	Inside-AD	notB	notB
339	0000126-72-7	BrCC(COP(=O)(OCC(CBr)Br)OCC(CBr)Br)Br	1.41658	notB	3.29203	6.01859	54.57	5.8663	Inside-AD	notB	notB
340	0000126-73-8	CCCCOP(=O)(OCCCC)OCCCC	1.2945	notB	2.9405	5.73334	54.57	5.29444	Inside-AD	notB	notB
341	0000127-20-8	OC(=O)C(Cl)(Cl)C	0.651362	notB	2.84535	4.93447	37.3	3.10262	Inside-AD	notB	notB
342	0000127-27-5	C=CC1(C)CCC2C(=C1)CCC1C2(C)CCCC1(C)C(=O)O	1.84866	notB	4.17065	6.71052	37.3	4.9548	Inside-AD	notB	notB
343	0000127-68-4	O=N(=O)c1cccc(c1)S(=O)(=O)O	0.46366	notB	3.61437	5.83773	105.89	3.6888	Inside-AD	notB	notB
344	0000127-90-2	ClC(C(Cl)(Cl)Cl)COCC(C(Cl)(Cl)Cl)Cl	2.66647	notB	2.79661	5.86079	9.23	2.54906	Inside-AD	B	B
345	0000128-37-0	Cc1cc(c(c(c1)C(C)(C)C)O)C(C)(C)C	3.20018	notB	2.73885	6.20456	20.23	4.38449	Inside-AD	B	B
346	0000128-39-2	CC(c1cccc(c1O)C(C)(C)C)(C)C	2.82	notB	2.47099	6.1203	20.23	4.26005	Inside-AD	B	B
347	0000129-00-0	c1cc2ccc3c4c2c(c1)ccc4ccc3	2.8858	notB	2.03816	6.38182	0	0.212407	Inside-AD	B	B
348	0000129-43-1	Oc1cccc2c1C(=O)c1ccccc1C2=O	1.88499	notB	3.12721	6.36819	54.37	5.16213	Inside-AD	notB	notB
349	0000130-13-2	Nc1ccc(c2c1cccc2)S(=O)(=O)O	0.961429	notB	3.60539	6.15486	88.77	4.22104	Inside-AD	notB	notB
350	0000131-09-9	Clc1ccc2c(c1)C(=O)c1c(C2=O)cccc1	2.33024	notB	2.86991	6.35437	34.14	5.27169	Inside-AD	notB	notB
351	0000131-11-3	COC(=O)c1ccccc1C(=O)OC	1.76	notB	3.02206	5.83188	52.6	4.22463	Inside-AD	notB	notB
352	0000131-52-2	Clc1c(O)c(Cl)c(c(c1Cl)Cl)Cl	2.09164	notB	2.28778	5.85507	20.23	3.84472	Inside-AD	notB	notB
353	0000131-55-5	Oc1ccc(c(c1)O)C(=O)c1ccc(cc1O)O	0.022	notB	3.25343	6.24804	97.99	5.0273	Inside-AD	notB	notB
354	0000131-57-7	COc1ccc(c(c1)O)C(=O)c1ccccc1	1.94874	notB	3.53851	6.12468	46.53	5.06594	Inside-AD	notB	notB
355	0000132-64-9	c1ccc2c(c1)oc1c2cccc1	3.27605	notB	2.48756	6.05678	13.14	2.15241	Inside-AD	B	B
356	0000132-65-0	c1ccc2c(c1)sc1c2cccc1	3.26452	notB	2.48756	6.05678	28.24	0.312243	Inside-AD	B	B
357	0000134-32-7	Nc1cccc2c1cccc2	1.44115	notB	2.76387	5.72685	26.02	1.7562	Inside-AD	B	notB
358	0000134-47-4	O=C(Nc1ccc2c(c1)cc(cc2O)S(=O)(=O)O)Nc1ccc2c(c1)cc(cc2O)S(=O)(=O)O	1.06	notB	4.13947	7.00941	207.09	5.46216	Outside-AD	notB	notB
359	0000134-62-3	CCN(C(=O)c1cccc(c1)C)CC	0.350532	notB	3.65534	5.80814	20.31	4.88509	Inside-AD	notB	notB
360	0000135-88-6	c1ccc(cc1)Nc1ccc2c(c1)cccc2	2.33035	notB	2.63559	6.1591	12.03	0.896037	Inside-AD	B	B
361	0000137-26-8	CN(C(=S)SSC(=S)N(C)C)C	0.527715	notB	2.12581	5.42495	121.26	0.4291	Inside-AD	notB	notB
362	0000137-30-4	CN(C(=S)S)C	2.31	notB	2.35353	4.46591	74.13	0.245199	Inside-AD	notB	notB
363	0000139-13-9	OC(=O)CN(CC(=O)O)CC(=O)O	1.75	notB	2.67379	5.50939	115.14	3.14517	Inside-AD	notB	notB
364	0000139-87-7	OCCN(CCO)CC	0.54	notB	3.07393	4.89035	43.7	2.47111	Inside-AD	notB	notB
365	0000141-78-6	CCOC(=O)C	1.48	notB	2.98523	4.29046	26.3	2.82153	Inside-AD	notB	notB
366	0000141-93-5	CCc1cccc(c1)CC	2.78784	notB	2.93872	5.37064	0	0.277778	Inside-AD	B	notB
367	0000142-96-1	CCCCOCCCC	1.90385	notB	2.69897	4.67283	9.23	1.81444	Inside-AD	notB	notB
368	0000143-50-0	O=C1C2(Cl)C3(C4(C1(Cl)C1(C2(C3(Cl)C(C41Cl)(Cl)Cl)Cl)Cl)Cl)Cl	3.1672	notB	2.79661	7.41035	17.07	6.82473	Inside-AD	B	B
369	0000145-73-3	OC(=O)C1C2CCC(C1C(=O)O)O2	1	notB	3.39313	6.07074	83.83	3.76296	Inside-AD	notB	notB
370	0000148-24-3	Oc1cccc2c1nccc2	1.115	notB	3.41383	5.72685	33.12	3.3087	Inside-AD	notB	notB
371	0000149-30-4	S=c1sc2c([nH]1)cccc2	0.4	notB	3.09307	5.65948	69.75	1.54154	Inside-AD	notB	notB
372	0000151-21-3	CCCCCCCCCCCCOS(=O)(=O)O	0.0759091	notB	2.65432	5.64545	71.98	3.37307	Inside-AD	notB	notB
373	0000152-11-4	COc1ccc(cc1OC)CCN(CCCC(c1ccc(c(c1)OC)OC)(C(C)C)C#N)C	1.27687	notB	4.33575	6.79459	63.95	4.24211	Inside-AD	notB	notB
374	0000156-43-4	CCOc1ccc(cc1)N	0.58	notB	3.40399	5.34233	35.25	1.70528	Inside-AD	notB	notB
375	0000208-96-8	c1cc2cccc3c2c(c1)C=C3	2.76027	notB	2.74644	6.01859	0	0.178241	Inside-AD	B	B
376	0000217-59-4	c1ccc2c(c1)c1ccccc1c1c2cccc1	2.41	notB	1.92193	6.44731	0	0.212407	Inside-AD	B	B
377	0000218-21-0	CCOP(=S)(OCC)SCCS(=O)CC	0	notB	3.54248	5.68698	121.94	4.5149	Inside-AD	notB	notB
378	0000225-11-6	c1ccc2c(c1)cc1c(n2)ccc2c1cccc2	2.025	notB	2.85613	6.4151	12.89	1.72782	Inside-AD	B	B
379	0000226-36-8	c1ccc2c(c1)c1cc3ccc4c(c3nc1cc2)cccc4	2.46485	notB	2.85051	6.67077	12.89	1.95596	Inside-AD	B	B
380	0000260-94-6	c1ccc2c(c1)nc1c(c2)cccc1	2.37	notB	2.5875	6.07074	12.89	1.57769	Inside-AD	B	B
381	0000271-89-6	c1ccc2c(c1)occ2	2.56	notB	2.86625	5.50939	13.14	1.61787	Inside-AD	notB	notB
382	0000280-57-9	C1CN2CCN1CC2	0.69	notB	1.29546	5.40717	6.48	0.541667	Inside-AD	B	B
383	0000298-00-0	COP(=S)(Oc1ccc(cc1)N(=O)=O)OC	1.11908	notB	3.48853	5.99396	112.73	3.44851	Inside-AD	notB	notB
384	0000298-06-6	CCOP(=S)(OCC)S	0.358333	notB	2.84644	5.11799	99.16	2.14393	Inside-AD	notB	notB
385	0000298-07-7	CCCCC(COP(=O)(OCC(CCCC)CC)O)CC	0.586557	notB	3.25343	6.01859	65.57	5.0368	Inside-AD	notB	notB
386	0000299-84-3	COP(=S)(Oc1cc(Cl)c(cc1Cl)Cl)OC	2.09112	notB	3.40727	6.06146	69.59	2.62045	Inside-AD	notB	notB
387	0000300-76-5	COP(=O)(OC(C(Br)(Cl)Cl)Br)OC	0.93	notB	3.24644	5.75257	54.57	4.7643	Inside-AD	notB	notB
388	0000306-52-5	ClC(COP(=O)(O)O)(Cl)Cl	0.145067	notB	3.03915	5.38907	76.57	3.32812	Inside-AD	notB	notB
389	0000307-55-1	OC(=O)C(C(C(C(C(C(C(C(C(C(C(F)(F)F)(F)F)(F)F)(F)F)(F)F)(F)F)(F)F)(F)F)(F)F)(F)F)(F)F	3.08111	notB	2.5778	7.28139	37.3	5.3656	Inside-AD	B	B
390	0000309-00-2	ClC1=C(Cl)C2(C(C1(Cl)C1C2C2CC1C=C2)(Cl)Cl)Cl	2.43578	notB	3.77736	6.84268	0	0.653733	Inside-AD	B	B
391	0000314-40-9	CCC(n1c(=O)[nH]c(c(c1=O)Br)C)C	0.706287	notB	3.84411	5.96358	46.5	4.79215	Inside-AD	notB	notB
392	0000318-98-9	OC(COc1cccc2c1cccc2)CNC(C)C	2.2875	notB	4.05515	6.1717	41.49	3.84395	Inside-AD	notB	notB
393	0000319-84-6	ClC1C(Cl)C(Cl)C(C(C1Cl)Cl)Cl	2.78649	notB	1.58496	5.85507	0	0.00786694	Inside-AD	B	B
394	0000320-60-5	Clc1ccc(c(c1)Cl)C(F)(F)F	2.42404	notB	3.00624	5.80212	0	4.21994	Inside-AD	notB	notB
395	0000328-84-7	Clc1ccc(cc1Cl)C(F)(F)F	3.095	notB	2.82258	5.78383	0	4.13111	Inside-AD	notB	notB
396	0000330-54-1	O=C(N(C)C)Nc1ccc(c(c1)Cl)Cl	1.24053	notB	3.37581	5.82008	32.34	4.34685	Inside-AD	notB	notB
397	0000333-41-5	CCOP(=S)(Oc1cc(C)nc(n1)C(C)C)OCC	1.86678	notB	3.72757	6.18002	95.37	2.57165	Inside-AD	notB	notB
398	0000335-67-1	OC(=O)C(C(C(C(C(C(C(F)(F)F)(F)F)(F)F)(F)F)(F)F)(F)F)(F)F	2.116	notB	2.98009	6.82979	37.3	4.82542	Inside-AD	B	B
399	0000335-99-9	OCC(C(C(C(C(C(F)F)(F)F)(F)F)(F)F)(F)F)(F)F	1.36	notB	2.83604	6.53524	20.23	4.61347	Inside-AD	B	B
400	0000346-10-1	CCC(C(=O)Nc1ccc(c(c1)O)NC(=O)C(C(C(F)(F)F)(F)F)(F)F)Oc1ccc(cc1C(CC)(C)C)C(CC)(C)C	1.976	notB	4.36233	7.19968	87.66	6.08438	Inside-AD	notB	notB
401	0000351-00-2	Nc1cc(c(c2c1C(=O)c1c(C2=O)c(N)cc(c1O)S(=O)(=O)O)O)S(=O)(=O)O	0.1	notB	4.0374	6.95559	252.14	5.82105	Outside-AD	notB	notB
402	0000355-80-6	OCC(C(C(C(F)F)(F)F)(F)F)(F)F	0.97	notB	3.08605	6.05209	20.23	4.09042	Inside-AD	notB	notB
403	0000360-97-4	NC(=O)c1[nH]cnc1N	0.715	notB	3.37356	5.38907	97.79	3.35384	Inside-AD	notB	notB
404	0000402-31-3	FC(c1cccc(c1)C(F)(F)F)(F)F	2.51	notB	2.53049	5.98896	0	3.9887	Inside-AD	B	notB
405	0000461-58-5	NC(=N)NC#N	0.086	notB	3.12193	4.29046	85.69	1.65472	Inside-AD	notB	notB
406	0000471-77-2	CC(=C1CCC2C(=C1)CCC1C2(C)CCCC1(C)C(=O)O)C	2.13704	notB	4.27277	6.67834	37.3	4.95257	Inside-AD	notB	notB
407	0000473-54-1	CC1(O)CCC2CC1C2(C)C	0.83	notB	3.20146	6.0845	20.23	4.0165	Inside-AD	notB	notB
408	0000479-27-6	Nc1cccc2c1c(N)ccc2	0.750918	notB	2.93626	5.86647	52.04	1.77704	Inside-AD	notB	B
409	0000482-89-3	O=C1c2ccccc2NC1=C1Nc2c(C1=O)cccc2	0.456903	notB	3.24022	6.56103	58.2	5.36779	Inside-AD	notB	notB
410	0000488-23-3	Cc1c(C)ccc(c1C)C	2.82	notB	2.12581	5.54908	0	0.178241	Inside-AD	B	B
411	0000496-10-6	C1CCC2C(C1)CCC2	2.91	notB	1.84154	5.50939	0	0.0601852	Inside-AD	B	B
412	0000497-18-7	NNC(=O)NN	0.65	notB	2.4183	4.31749	93.17	2.70833	Inside-AD	notB	notB
413	0000500-28-7	COP(=S)(Oc1ccc(c(c1)Cl)N(=O)=O)OC	0.571359	notB	3.69026	6.10256	112.73	3.69552	Inside-AD	notB	notB
414	0000504-03-0	CC1CCCC(N1)C	0.2	notB	2.82706	5.14166	12.03	0.979167	Inside-AD	notB	notB
415	0000504-24-5	Nc1ccncc1	0.347069	notB	2.93121	4.89035	38.91	1.31778	Inside-AD	notB	notB
416	0000504-29-0	Nc1ccccn1	1.05267	notB	3.18083	4.89035	38.91	1.24667	Inside-AD	notB	notB
417	0000504-53-0	CCCCCCCCCCCCCCCCCC(=O)CCCCCCCCCCCCCCCCC	1.22	notB	1.87598	6.32615	17.07	5.11086	Inside-AD	B	B
418	0000509-34-2	CCN(c1ccc2c(c1)Oc1c(C32OC(=O)c2c3cccc2)ccc(c1)N(CC)CC)CC	0.46	notB	3.83452	7.07918	45.92	6.01466	Inside-AD	notB	notB
419	0000510-15-6	CCOC(=O)C(c1ccc(cc1)Cl)(c1ccc(cc1)Cl)O	2.0003	notB	3.622	6.41182	46.53	5.38397	Inside-AD	notB	notB
420	0000512-34-5	CC(CC(C)(C)C)CC(=O)O	0.54	notB	3.07266	5.42495	37.3	3.29557	Inside-AD	notB	notB
421	0000512-56-1	COP(=O)(OC)OC	-0.179228	notB	1.84987	5.03044	54.57	3.77623	Inside-AD	notB	notB
422	0000520-45-6	Cc1cc(O)c(c(=O)o1)C(=O)C	2.12012	notB	3.54644	5.77144	54.37	3.95481	Inside-AD	notB	notB
423	0000526-73-8	Cc1c(C)cccc1C	2.31599	notB	2.39046	5.37064	0	0.157407	Inside-AD	B	notB
424	0000526-78-3	BrC(C(C(=O)O)Br)C(=O)O	0.335597	notB	2.80735	5.31321	74.6	3.27771	Inside-AD	notB	notB
425	0000527-20-8	Clc1c(N)c(Cl)c(c(c1Cl)Cl)Cl	2.94	notB	2.35275	5.85507	26.02	2.10472	Inside-AD	B	B
426	0000527-60-6	Cc1cc(C)c(c(c1)C)O	0.867312	notB	2.67379	5.54126	20.23	3.33074	Inside-AD	notB	notB
427	0000538-75-0	C1CCC(CC1)N=C=NC1CCCCC1	0.124	notB	2.07571	5.81413	24.72	1.46061	Inside-AD	B	B
428	0000540-84-1	CC(CC(C)(C)C)C	2.785	notB	2.10974	5.05625	0	0.284722	Inside-AD	B	B
429	0000541-73-1	Clc1cccc(c1)Cl	2.48135	notB	2.18872	5.14166	0	0.312071	Inside-AD	B	B
430	0000542-18-7	ClC1CCCCC1	2.34619	notB	1.76885	4.89035	0	0.0588134	Inside-AD	B	notB
431	0000544-01-4	CC(CCOCCC(C)C)C	2.63808	notB	2.77107	5.11799	9.23	1.95528	Inside-AD	notB	notB
432	0000544-76-3	CCCCCCCCCCCCCCCC	1.24875	notB	1.70115	5.38907	0	0.29022	Inside-AD	B	B
433	0000554-00-7	Clc1ccc(c(c1)Cl)N	1.56092	notB	3.03915	5.35186	26.02	1.64777	Inside-AD	notB	notB
434	0000554-84-7	Oc1cccc(c1)N(=O)=O	1.4	notB	3.37356	5.43372	63.37	3.04759	Inside-AD	notB	notB
435	0000555-03-3	COc1cccc(c1)N(=O)=O	1.25994	notB	3.46132	5.52545	52.37	3.21908	Inside-AD	notB	notB
436	0000563-04-2	Cc1cccc(c1)OP(=O)(Oc1cccc(c1)C)Oc1cccc(c1)C	2.84286	notB	3.22293	6.59167	54.57	6.51209	Inside-AD	notB	notB
437	0000575-41-7	Cc1cc2ccccc2c(c1)C	3.13154	notB	3.04248	5.84932	0	0.224537	Inside-AD	B	notB
438	0000576-24-9	Clc1c(O)cccc1Cl	1.71985	notB	3.02699	5.37064	20.23	3.16716	Inside-AD	notB	notB
439	0000577-11-7	CCCCC(COC(=O)CC(S(=O)(=O)O)C(=O)OCC(CCCC)CC)CC	0.542222	notB	3.78652	6.39859	115.35	5.22309	Inside-AD	notB	notB
440	0000577-55-9	CC(c1ccccc1C(C)C)C	2.14	notB	2.60624	5.69373	0	0.251204	Inside-AD	B	B
441	0000579-10-2	CN(c1ccccc1)C(=O)C	0.698378	notB	3.19242	5.51745	20.31	3.8701	Inside-AD	notB	notB
442	0000579-66-8	CCc1cccc(c1N)CC	2.08	notB	3.22872	5.57215	26.02	1.90435	Inside-AD	notB	notB
443	0000581-40-8	Cc1cc2ccccc2cc1C	2.71	notB	2.79248	5.83773	0	0.240741	Inside-AD	B	B
444	0000583-53-9	Brc1ccccc1Br	3.1	notB	1.9183	5.15329	0	0.282729	Inside-AD	B	B
445	0000583-78-8	Clc1ccc(c(c1)O)Cl	1.18282	notB	3.02699	5.35186	20.23	3.16716	Inside-AD	notB	notB
446	0000584-79-2	C=CCC1=C(C)C(CC1=O)OC(=O)C1C(C1(C)C)C=C(C)C	2.265	notB	4.31842	6.57786	43.37	5.48006	Inside-AD	notB	notB
447	0000584-84-9	O=C=Nc1ccc(c(c1)N=C=O)C	2.45	notB	3.43162	5.68017	58.86	2.99602	Inside-AD	notB	notB
448	0000586-76-5	OC(=O)c1ccc(cc1)Br	1.005	notB	3.10689	5.42495	37.3	3.33131	Inside-AD	notB	notB
449	0000591-20-8	Oc1cccc(c1)Br	1.47082	notB	2.93121	5.14166	20.23	2.85046	Inside-AD	notB	notB
450	0000591-27-5	Nc1cccc(c1)O	1.148	notB	3.24022	5.14166	46.25	2.73306	Inside-AD	notB	notB
451	0000591-35-5	Oc1cc(Cl)cc(c1)Cl	2.16716	notB	2.87314	5.35186	20.23	3.04623	Inside-AD	notB	notB
452	0000599-61-1	Nc1cccc(c1)S(=O)(=O)c1cccc(c1)N	0.465	notB	3.20281	6.20859	94.56	5.37528	Inside-AD	notB	notB
453	0000599-64-4	Oc1ccc(cc1)C(c1ccccc1)(C)C	2.275	notB	3.03769	6.12468	20.23	3.29297	Inside-AD	B	notB
454	0000603-11-2	OC(=O)c1cccc(c1C(=O)O)N(=O)=O	0.288757	notB	3.68418	6.00389	117.74	3.6837	Inside-AD	notB	notB
455	0000606-20-2	Cc1c(cccc1N(=O)=O)N(=O)=O	1.34154	notB	3.2211	5.826	86.28	3.37954	Inside-AD	notB	notB
456	0000606-28-0	COC(=O)c1ccccc1C(=O)c1ccccc1	1.32738	notB	3.14376	6.17587	43.37	5.27973	Inside-AD	notB	notB
457	0000607-99-8	COc1c(Br)cc(cc1Br)Br	2.735	notB	3.03064	5.63835	9.23	1.87362	Inside-AD	notB	B
458	0000608-71-9	Brc1c(O)c(Br)c(c(c1Br)Br)Br	0.79	notB	2.28778	5.85507	20.23	3.9101	Inside-AD	notB	notB
459	0000610-39-9	Cc1ccc(c(c1)N(=O)=O)N(=O)=O	1.37286	notB	3.32636	5.81413	86.28	3.37954	Inside-AD	notB	notB
460	0000611-06-3	Clc1ccc(c(c1)Cl)N(=O)=O	1.99526	notB	3.18201	5.60947	43.14	3.37814	Inside-AD	notB	notB
461	0000612-22-6	CCc1ccccc1N(=O)=O	0.905358	notB	3.48418	5.55683	43.14	3.3862	Inside-AD	notB	notB
462	0000613-12-7	Cc1ccc2c(c1)cc1c(c2)cccc1	2.41	notB	2.90159	6.15486	0	0.261574	Inside-AD	B	B
463	0000615-54-3	Brc1ccc(c(c1)Br)Br	2.77752	notB	2.12581	5.35186	0	0.469972	Inside-AD	B	B
464	0000615-58-7	Brc1ccc(c(c1)Br)O	1.45	notB	3.02699	5.35186	20.23	3.12813	Inside-AD	notB	notB
465	0000615-59-8	Brc1ccc(c(c1)C)Br	2.67	notB	3.00624	5.35186	0	0.366062	Inside-AD	notB	B
466	0000615-74-7	Cc1ccc(c(c1)O)Cl	0.46462	notB	3.40564	5.35186	20.23	3.14099	Inside-AD	notB	notB
467	0000616-44-4	Cc1cscc1	0.668638	notB	3.02206	4.76217	28.24	0.421296	Inside-AD	notB	notB
468	0000618-62-2	Clc1cc(cc(c1)Cl)N(=O)=O	2.16999	notB	3.03915	5.59471	43.14	3.34728	Inside-AD	notB	notB
469	0000620-92-8	Oc1ccc(cc1)Cc1ccc(cc1)O	1.075	notB	2.90304	5.93225	40.46	3.12609	Inside-AD	notB	notB
470	0000622-24-2	ClCCc1ccccc1	1.865	notB	2.92745	5.15329	0	0.196312	Inside-AD	notB	notB
471	0000622-57-1	CCNc1ccc(cc1)C	0.653717	notB	3.5014	5.34233	12.03	0.734722	Inside-AD	notB	notB
472	0000622-97-9	C=Cc1ccc(cc1)C	1.5	notB	3.26083	5.25227	0	0.660593	Inside-AD	notB	notB
473	0000623-26-7	N#Cc1ccc(cc1)C#N	0.45848	notB	2.23593	5.36129	47.58	2.36828	Inside-AD	notB	notB
474	0000626-17-5	N#Cc1cccc(c1)C#N	0.864328	notB	2.6645	5.37064	47.58	2.39815	Inside-AD	notB	notB
475	0000626-67-5	CN1CCCCC1	0.84471	notB	2.70869	4.89035	3.24	0.392361	Inside-AD	notB	notB
476	0000629-25-4	CCCCCCCCCCCC(=O)O	2.406	notB	2.5778	5.3033	37.3	3.2064	Inside-AD	notB	notB
477	0000629-62-9	CCCCCCCCCCCCCCC	1.364	notB	1.72959	5.31321	0	0.287998	Inside-AD	B	B
478	0000634-91-3	Nc1cc(Cl)c(c(c1)Cl)Cl	2.42	notB	2.89629	5.54126	26.02	1.69885	Inside-AD	notB	notB
479	0000634-93-5	Clc1cc(Cl)c(c(c1)Cl)N	2.18821	notB	2.89629	5.54126	26.02	1.85071	Inside-AD	notB	notB
480	0000636-28-2	Brc1cc(Br)c(cc1Br)Br	2.92442	notB	1.9183	5.53339	0	0.565458	Inside-AD	B	B
481	0000636-30-6	Clc1cc(Cl)c(cc1N)Cl	2.205	notB	3.03915	5.53339	26.02	1.77478	Inside-AD	notB	notB
482	0000647-42-7	OCCC(C(C(C(C(C(F)(F)F)(F)F)(F)F)(F)F)(F)F)(F)F	1.76	notB	3.02418	6.64769	20.23	4.78868	Inside-AD	B	B
483	0000678-39-7	OCCC(C(C(C(C(C(C(C(F)(F)F)(F)F)(F)F)(F)F)(F)F)(F)F)(F)F)(F)F	2.765	notB	2.81205	6.94216	20.23	5.10788	Inside-AD	B	B
484	0000680-31-9	CN(P(=O)(N(C)C)N(C)C)C	-0.043	notB	1.57097	5.63121	36.6	5.21373	Inside-AD	notB	notB
485	0000696-44-6	CNc1cccc(c1)C	0.788262	notB	3.44644	5.26269	12.03	0.567778	Inside-AD	notB	notB
486	0000709-98-8	CCC(=O)Nc1ccc(c(c1)Cl)Cl	1.945	notB	3.62922	5.71373	29.1	4.0899	Inside-AD	notB	notB
487	0000731-27-1	Cc1ccc(cc1)N(S(=O)(=O)N(C)C)SC(Cl)(Cl)F	1.95	notB	3.80423	6.286	74.3	6.13686	Inside-AD	notB	notB
488	0000732-11-6	COP(=S)(SCN1C(=O)c2c(C1=O)cccc2)OC	0.522038	notB	3.67969	6.35437	123.04	5.19866	Inside-AD	notB	notB
489	0000759-94-4	CCCN(C(=O)SCC)CCC	1.78	notB	3.2597	5.34233	45.61	4.54368	Inside-AD	notB	notB
490	0000760-23-6	ClC(C=C)CCl	0.757195	notB	3.25163	4.31749	0	0.698503	Inside-AD	notB	notB
491	0000764-13-6	CC(=CC=C(C)C)C	2.37385	notB	1.86763	4.77912	0	0.12037	Inside-AD	notB	notB
492	0000767-00-0	N#Cc1ccc(cc1)O	0.91	notB	2.95021	5.25227	44.02	2.74278	Inside-AD	notB	notB
493	0000779-02-2	Cc1c2ccccc2cc2c1cccc2	3.19	notB	2.7814	6.18415	0	0.261574	Inside-AD	B	B
494	0000786-19-6	CCOP(=S)(OCC)SCSc1ccc(cc1)Cl	2.768	notB	3.80776	6.01859	110.96	2.65274	Inside-AD	notB	notB
495	0000788-59-2	OC(=O)C(OC(C(OC(C(F)(F)F)(F)F)(F)F)(F)F)(F)F	0.76	notB	3.35649	6.47543	55.76	4.43479	Inside-AD	notB	notB
496	0000800-28-0	CC(CC(=O)OCC(COC(=O)CC(S)C)(COC(=O)CC(S)C)COC(=O)CC(S)C)S	2.23	notB	3.62998	6.58617	260.4	5.2543	Outside-AD	notB	notB
497	0000801-01-1	COC(C(C(F)(F)F)(F)F)(F)F	1.46	notB	3.00624	5.87212	9.23	3.73438	Inside-AD	notB	B
498	0000803-20-2	OC(=O)C(C(F)(F)F)(OC(C(C(F)(F)F)(F)F)(F)F)F	1.48	notB	3.46328	6.48768	46.53	4.70808	Inside-AD	notB	notB
499	0000805-75-8	CN(CCCNC(=O)N)C	0.36	notB	3.46347	5.01728	58.36	3.14149	Inside-AD	notB	notB
500	0000822-77-5	NCCNCc1ccccc1	0.595	notB	3.42928	5.32301	38.05	1.33017	Inside-AD	notB	notB
501	0000827-21-4	Cc1ccc(c(c1)C)S(=O)(=O)O	0.13	notB	3.35649	5.80212	62.75	3.86871	Inside-AD	notB	notB
502	0000829-26-5	Cc1ccc2c(c1)cc(c(c2)C)C	3	notB	2.7679	5.9428	0	0.261574	Inside-AD	B	B
503	0000832-69-9	Cc1cccc2c1ccc1c2cccc1	3.18	notB	2.84197	6.18415	0	0.215278	Inside-AD	B	B
504	0000834-12-8	CCNc1nc(NC(C)C)nc(n1)SC	1.17333	notB	3.64737	5.84354	88.03	1.39561	Inside-AD	notB	notB
505	0000839-90-7	OCCn1c(=O)n(CCO)c(=O)n(c1=O)CCO	-0.2	notB	3.0958	6.17587	111.9	4.77481	Inside-AD	notB	notB
506	0000840-65-3	COC(=O)c1ccc2c(c1)ccc(c2)C(=O)OC	1.58	notB	3.13957	6.21261	52.6	4.38227	Inside-AD	notB	notB
507	0000842-18-2	Oc1ccc2c(c1)c(cc(c2)S(=O)(=O)O)S(=O)(=O)O	0	notB	3.80638	6.42811	145.73	4.39941	Inside-AD	notB	notB
508	0000843-55-0	Oc1ccc(cc1)C1(CCCCC1)c1ccc(cc1)O	1.605	notB	3.12257	6.42487	40.46	3.51289	Inside-AD	B	notB
509	0000872-05-9	CCCCCCCCC=C	3.22	notB	2.91441	4.81218	0	0.694652	Inside-AD	notB	notB
510	0000873-63-2	OCc1cccc(c1)Cl	1.35059	notB	3.25	5.26269	20.23	2.68021	Inside-AD	notB	notB
511	0000875-35-4	N#Cc1c(C)cc(nc1Cl)Cl	0.59	notB	3.32323	5.63835	36.68	2.73968	Inside-AD	notB	notB
512	0000877-11-2	Clc1c(C)c(Cl)c(c(c1Cl)Cl)Cl	2.57144	notB	2.3656	5.85507	0	0.364719	Inside-AD	B	B
513	0000879-39-0	Clc1cc(N(=O)=O)c(c(c1Cl)Cl)Cl	1.60409	notB	2.95021	5.8944	43.14	3.71894	Inside-AD	notB	notB
514	0000882-33-7	c1ccc(cc1)SSc1ccccc1	0.905	notB	2.05459	5.76519	50.6	0.331363	Inside-AD	B	B
515	0000886-50-0	CCNc1nc(SC)nc(n1)NC(C)(C)C	1.95	notB	3.39987	5.98394	88.03	1.44082	Inside-AD	notB	notB
516	0000901-44-0	OCCOc1ccc(cc1)C(c1ccc(cc1)OCCO)(C)C	1.185	notB	3.52247	6.40523	58.92	2.7874	Inside-AD	notB	B
517	0000903-19-5	CC(c1cc(O)c(cc1O)C(CC(C)(C)C)(C)C)(CC(C)(C)C)C	2.475	notB	2.78135	6.63463	40.46	4.6988	Inside-AD	B	notB
518	0000909-55-4	CC(CC(CC(C)(C)C)(C)C)CC(C)(C)C	2.14333	notB	2.20602	6.01859	0	0.427986	Inside-AD	B	B
519	0000930-10-9	CCCCCCCCCCCCCOCCOCCOCCOCCOCCOCCOCCOCCO	1.5	notB	2.66605	6.34739	94.07	2.56664	Inside-AD	B	notB
520	0000933-12-0	CC1C=CCC(C1)(C)C	2.87	notB	3.18268	5.43372	0	0.340278	Inside-AD	notB	notB
521	0000944-22-9	CCP(=S)(Sc1ccccc1)OCC	1.89	notB	3.55197	5.78996	76.43	2.68996	Inside-AD	notB	notB
522	0000947-04-6	O=C1CCCCCCCCCCCN1	0.244876	notB	2.54161	5.50126	29.1	4.27386	Inside-AD	notB	notB
523	0000947-72-8	Clc1cc2ccccc2c2c1cccc2	2.47083	notB	2.49584	6.18826	0	0.334276	Inside-AD	B	B
524	0000948-65-2	c1ccc(cc1)c1cc2c([nH]1)cccc2	2.555	notB	2.63952	6.10702	15.79	0.911852	Inside-AD	B	B
525	0000950-37-8	COc1sc(=O)n(n1)CSP(=S)(OC)OC	0.97056	notB	3.47602	6.00881	149.62	4.65599	Inside-AD	notB	notB
526	0000961-11-5	ClC=C(c1cc(Cl)c(cc1Cl)Cl)OP(=O)(OC)OC	1.66991	notB	3.7979	6.24028	54.57	5.22227	Inside-AD	notB	notB
527	0000962-58-3	CCOP(=O)(Oc1cc(C)nc(n1)C(C)C)OCC	0.627436	notB	3.72757	6.18002	80.35	5.37143	Inside-AD	notB	notB
528	0000986-94-6	O=N(=O)c1cc(c(c(c1Cl)N(=O)=O)Cl)C(F)(F)F	2.46	notB	3.47135	6.3081	86.28	4.66157	Inside-AD	notB	notB
529	0000990-23-3	CCCCCCCCCCCCSCCC(=O)Oc1cc(C)c(cc1C(C)(C)C)Sc1cc(c(cc1C)O)C(C)(C)C	1.49	notB	3.98689	6.99668	97.13	5.88972	Inside-AD	notB	notB
530	0000991-32-9	CCCCC(COC(=O)CCc1cc(c(c(c1)C(C)(C)C)O)C(C)(C)C)CC	1.76	notB	3.67858	6.608	46.53	5.26954	Inside-AD	notB	notB
531	0000993-52-1	COc1cc(OC)c(cc1C(=O)Oc1ccc(cc1)C(=O)OC)OC	0.26	notB	3.58245	6.51471	80.29	5.44633	Inside-AD	notB	notB
532	0000999-73-0	COc1ccccc1NC(=O)C(C(=O)C)N=Nc1ccc(cc1N(=O)=O)S(=O)(=O)O	1	notB	4.80267	6.72022	186.01	5.46632	Outside-AD	notB	notB
533	0001014-70-6	CCNc1nc(NCC)nc(n1)SC	2.07111	notB	3.46954	5.7462	88.03	1.3452	Inside-AD	notB	notB
534	0001071-83-6	OC(=O)CNCP(=O)(O)O	1.30286	notB	3.72548	5.22036	116.67	3.17521	Inside-AD	notB	notB
535	0001073-72-9	CSc1ccc(cc1)O	0.895	notB	3.10188	5.25227	45.53	2.87585	Inside-AD	notB	notB
536	0001074-24-4	Cc1cc(Br)c(cc1Br)C	3.16	notB	2.6416	5.53339	0	0.403099	Inside-AD	B	B
537	0001116-76-3	CCCCCCCCN(CCCCCCCC)CCCCCCCC	1.95652	notB	2.40325	5.96871	3.24	0.791133	Inside-AD	B	B
538	0001120-01-0	CCCCCCCCCCCCCCCCOS(=O)(=O)O	1.86	notB	2.39263	5.84932	71.98	3.44663	Inside-AD	notB	notB
539	0001141-38-4	OC(=O)c1ccc2c(c1)ccc(c2)C(=O)O	0.512327	notB	3.02206	6.1203	74.6	3.72567	Inside-AD	notB	notB
540	0001163-19-5	Brc1c(Oc2c(Br)c(Br)c(c(c2Br)Br)Br)c(Br)c(c(c1Br)Br)Br	1.26667	notB	1.97012	6.61338	9.23	3.4702	Inside-AD	B	B
541	0001190-72-3	O=C1C=Cc2c(C1=NNc1cc(C)c(cc1S(=O)(=O)O)Cl)cccc2	1.442	notB	4.50412	6.66058	104.21	5.17173	Inside-AD	notB	notB
542	0001191-50-0	CCCCCCCCCCCCCCOS(=O)(=O)O	1.04	notB	2.5124	5.75257	71.98	3.41408	Inside-AD	notB	notB
543	0001193-65-3	O=C1CN2CCC1CC2	0.77	notB	3.22193	5.58725	20.31	4.01407	Inside-AD	notB	notB
544	0001197-18-8	NCC1CCC(CC1)C(=O)O	1.01	notB	3.46967	5.51745	63.32	3.5181	Inside-AD	notB	notB
545	0001212-29-9	S=C(NC1CCCCC1)NC1CCCCC1	0.669367	notB	2.37322	5.92693	56.15	1.24985	Inside-AD	B	B
546	0001241-94-7	CCCCC(COP(=O)(Oc1ccccc1)Oc1ccccc1)CC	2.69472	notB	3.65739	6.40192	54.57	6.30296	Inside-AD	notB	notB
547	0001300-33-3	Nc1cc(cc2c1c(O)cc(c2)S(=O)(=O)O)S(=O)(=O)O	0.133333	notB	3.89246	6.49375	171.75	4.22282	Outside-AD	notB	notB
548	0001321-74-0	C=Cc1ccccc1C=C	2.54757	notB	2.92193	5.39816	0	0.691759	Inside-AD	B	B
549	0001322-93-6	CC(c1cc2ccccc2c(c1C(C)C)S(=O)(=O)O)C	0.407876	notB	3.5062	6.47235	62.75	5.05066	Inside-AD	notB	notB
550	0001330-16-1	CC1C=CC2CC1C2(C)C	2.61	notB	3.21854	5.92158	0	0.421296	Inside-AD	B	B
551	0001330-78-5	Cc1ccccc1OP(=O)(Oc1ccccc1C)Oc1ccccc1C	2.62796	notB	3.09527	6.608	54.57	6.63486	Inside-AD	notB	notB
552	0001420-06-0	O1CCN(CC1)C(c1ccccc1)(c1ccccc1)c1ccccc1	3.11	notB	2.93085	6.67582	12.47	2.16083	Inside-AD	B	B
553	0001477-55-0	NCc1cccc(c1)CN	-0.045	notB	3.00489	5.37064	52.04	1.43259	Inside-AD	notB	notB
554	0001502-22-3	O=C1CCCCC1C1=CCCCC1	0.841286	notB	3.22891	5.826	17.07	4.65271	Inside-AD	notB	notB
555	0001506-02-1	CC1CC(C)(C)c2c(C1(C)C)cc(c(c2)C(=O)C)C	2.78	notB	3.53378	6.50877	17.07	4.78871	Inside-AD	notB	B
556	0001552-42-7	CN(c1ccc(cc1)C1(OC(=O)c2c1ccc(c2)N(C)C)c1ccc(cc1)N(C)C)C	3.165	notB	3.18437	6.9575	36.02	6.09572	Inside-AD	B	B
557	0001570-64-5	Clc1ccc(c(c1)C)O	1.56815	notB	3.40564	5.35186	20.23	3.06188	Inside-AD	notB	notB
558	0001591-88-5	Brc1cc(c(c2c1C(=O)c1ccccc1C2=O)N)S(=O)(=O)O	0.17	notB	3.96141	6.67582	122.91	5.63951	Inside-AD	notB	notB
559	0001610-18-0	COc1nc(NC(C)C)nc(n1)NC(C)C	0.89	notB	3.19287	5.93225	71.96	1.51643	Inside-AD	notB	notB
560	0001623-19-4	C=CCOP(=O)(OCC=C)OCC=C	0.774394	notB	2.96853	5.56452	54.57	4.80332	Inside-AD	notB	notB
561	0001631-58-9	CN(C1CSSC1)C	1.69121	notB	2.69478	5.16479	53.84	0.446759	Inside-AD	notB	notB
562	0001634-04-4	COC(C)(C)C	0.18	notB	2.05664	4.63473	9.23	1.4375	Inside-AD	notB	notB
563	0001634-78-2	CCOC(=O)CC(C(=O)OCC)SP(=O)(OC)OC	0.399083	notB	3.85268	6.02345	123.24	5.22294	Inside-AD	notB	notB
564	0001667-10-3	ClCc1ccc(cc1)c1ccc(cc1)CCl	1.19	notB	2.80735	6.01859	0	0.260348	Inside-AD	B	B
565	0001678-98-4	CC(CC1CCCCC1)C	3.3	notB	2.59742	5.32301	0	0.341871	Inside-AD	B	B
566	0001687-30-5	OC(=O)C1CCCCC1C(=O)O	1.09286	notB	2.9183	5.69373	74.6	3.60588	Inside-AD	notB	notB
567	0001689-83-4	N#Cc1cc(I)c(c(c1)I)O	1.46	notB	3.23593	5.62402	44.02	3.43874	Inside-AD	notB	notB
568	0001702-17-6	Clc1ccc(c(n1)C(=O)O)Cl	0	notB	3.6645	5.60947	50.19	3.55583	Inside-AD	notB	notB
569	0001740-19-8	OC(=O)C1(C)CCCC2(C1CCc1c2ccc(c1)C(C)C)C	1.884	notB	3.96837	6.67834	37.3	4.92863	Inside-AD	notB	notB
570	0001746-01-6	Clc1cc2Oc3cc(Cl)c(cc3Oc2cc1Cl)Cl	3.22162	notB	2.55034	6.38519	18.46	2.51277	Inside-AD	B	B
571	0001746-81-2	CON(C(=O)Nc1ccc(cc1)Cl)C	1.3025	notB	3.78347	5.7589	41.57	4.32844	Inside-AD	notB	notB
572	0001779-48-2	OP(=O)c1ccccc1	0.310514	notB	2.85222	5.25227	60.77	3.5178	Inside-AD	notB	notB
573	0001805-32-9	OCc1ccc(c(c1)Cl)Cl	0.671344	notB	3.15564	5.45104	20.23	2.78446	Inside-AD	notB	notB
574	0001806-26-4	CCCCCCCCc1ccc(cc1)O	2.20549	notB	3.32366	5.66643	20.23	3.12537	Inside-AD	notB	notB
575	0001827-79-6	O1CC1COc1c2ccccc2c(c2c1cccc2)OCC1OC1	2.29	notB	3.3447	6.71052	43.52	2.64418	Inside-AD	B	B
576	0001828-52-6	CC1COC(O1)(Cn1cncn1)c1ccc(cc1Cl)Oc1ccc(cc1)Cl	1.98	notB	4.52395	6.7417	58.4	2.73951	Inside-AD	notB	notB
577	0001829-62-2	N#Cc1c(Nc2ccc(cc2)S(=O)(=O)O)nc(c(c1C)N=Nc1nc(c(s1)N=Nc1cc2c(c(c1)S(=O)(=O)O)cc(cc2S(=O)(=O)O)S(=O)(=O)O)c1ccc2c(c1)cccc2)Nc1ccc(cc1)S(=O)(=O)O	1.28	notB	4.67535	7.78447	465.06	5.84688	Outside-AD	notB	notB
578	0001835-10-1	COC(=O)c1[nH]cnc1C(=O)OC	0.77	notB	3.36804	5.78383	81.28	4.01449	Inside-AD	notB	notB
579	0001836-77-7	Clc1cc(Cl)cc(c1Oc1ccc(cc1)N(=O)=O)Cl	3.05705	notB	3.35327	6.2634	52.37	3.59862	Inside-AD	notB	notB
580	0001838-38-8	CCCc1ccc(cc1)C1OC(C(CO)O)C2C(O1)C(CCC)OC(O2)c1ccc(cc1)CCC	2.18	notB	4.18017	6.94022	77.38	4.71744	Inside-AD	notB	B
581	0001839-48-4	OC1=C(c2ccc3c(n2)c(cc(c3)S(=O)(=O)O)N2C(=O)c3c(C2=O)c(Cl)c(c(c3Cl)Cl)Cl)C(=O)c2c1c(Cl)c(c(c2Cl)Cl)Cl	2.48	notB	4.52386	7.44717	150.32	7.04835	Outside-AD	notB	notB
582	0001840-57-9	CCCCCCS(=O)(=O)c1ccc(c(c1)S(=O)(=O)O)Nc1ccc2c3c1c(=O)c1ccccc1c3c(c(=O)n2C)C(=O)c1cccc(c1)S(=O)(=O)O	1.85	notB	4.96517	7.49942	234.5	7.28856	Outside-AD	notB	notB
583	0001844-59-7	CCCCC(CN(C(=O)C(NC(=O)Nc1cccc(c1)c1nn2c([nH]1)c(c(n2)C(C)(C)C)Cl)C)CC(CCCC)CC)CC	1.81	notB	4.3413	7.11558	107.42	6.75989	Inside-AD	notB	notB
584	0001846-78-9	c1ccc(cc1)OP1(=NP(=NP(=N1)(Oc1ccccc1)Oc1ccccc1)(Oc1ccccc1)Oc1ccccc1)Oc1ccccc1	1.64	notB	2.36471	7.30182	121.89	3.42458	Inside-AD	B	notB
585	0001879-09-0	Cc1cc(C)c(c(c1)C(C)(C)C)O	2.375	notB	3.18665	5.92693	20.23	3.85762	Inside-AD	notB	notB
586	0001897-45-6	N#Cc1c(Cl)c(C#N)c(c(c1Cl)Cl)Cl	2.25826	notB	2.6645	5.99396	47.58	3.05903	Inside-AD	notB	notB
587	0001934-21-0	O=c1c(N=Nc2ccc(cc2)S(=O)(=O)O)c([nH]n1c1ccc(cc1)S(=O)(=O)O)C(=O)O	-0.03	notB	4.21696	6.86797	216.62	5.63313	Outside-AD	notB	notB
588	0001945-53-5	CC(C1=CC2=C(CC1)C1(C)CCCC(C1CC2)(C)C(=O)O)C	1.39954	notB	3.90651	6.67834	37.3	4.94665	Inside-AD	notB	notB
589	0001987-50-4	CCCCCCCc1ccc(cc1)O	2.74833	notB	3.41896	5.60947	20.23	3.09823	Inside-AD	notB	notB
590	0002008-58-4	NC(=O)c1c(Cl)cccc1Cl	2.51	notB	3.20282	5.63835	43.09	3.91716	Inside-AD	notB	notB
591	0002012-00-2	CCOP(=O)(c1ccccc1)Oc1ccc(cc1)N(=O)=O	1.10018	notB	3.81388	6.34388	88.48	5.94816	Inside-AD	notB	notB
592	0002027-17-0	CC(c1ccc2c(c1)cccc2)C	3.25163	notB	3.05429	5.88332	0	0.277778	Inside-AD	B	B
593	0002032-59-9	CNC(=O)Oc1ccc(c(c1)C)N(C)C	0.724444	notB	3.66261	5.8999	41.57	3.96756	Inside-AD	notB	notB
594	0002042-14-0	Oc1ccc(c(c1)N(=O)=O)C	1.34243	notB	3.6416	5.60947	63.37	3.26843	Inside-AD	notB	notB
595	0002049-95-8	CCC(c1ccccc1)(C)C	3.18	notB	2.86993	5.60947	0	0.280093	Inside-AD	B	B
596	0002050-67-1	Clc1cccc(c1)c1cccc(c1)Cl	2.63	notB	2.55034	5.9162	0	0.307915	Inside-AD	B	B
597	0002050-68-2	Clc1ccc(cc1)c1ccc(cc1)Cl	2.79125	notB	2.36852	5.90536	0	0.230933	Inside-AD	B	B
598	0002051-62-9	Clc1ccc(cc1)c1ccccc1	1.69833	notB	2.25355	5.80212	0	0.213906	Inside-AD	B	B
599	0002057-49-0	c1ccc(cc1)CCCc1ccncc1	1.83	notB	3.36001	5.81413	12.89	1.01162	Inside-AD	B	notB
600	0002058-94-8	OC(=O)C(C(C(C(C(C(C(C(C(C(F)(F)F)(F)F)(F)F)(F)F)(F)F)(F)F)(F)F)(F)F)(F)F)(F)F	3.02444	notB	2.66458	7.18614	37.3	5.26013	Inside-AD	B	B
601	0002078-54-8	CC(c1cccc(c1O)C(C)C)C	1.545	notB	2.89696	5.826	20.23	3.92963	Inside-AD	notB	notB
602	0002104-64-5	CCOP(=S)(c1ccccc1)Oc1ccc(cc1)N(=O)=O	2.41609	notB	3.81388	6.34388	103.5	3.68483	Inside-AD	notB	notB
603	0002122-19-2	CC1CNC(=S)N1	1	notB	3.32323	5.04343	56.15	0.800412	Inside-AD	notB	notB
604	0002144-53-8	O=C(C(=C)C)OCCC(C(C(C(C(C(F)(F)F)(F)F)(F)F)(F)F)(F)F)(F)F	1.08	notB	3.68426	6.78784	26.3	5.26056	Inside-AD	notB	notB
605	0002162-99-4	ClCCCCCCCCCl	2.725	notB	2.19969	4.81218	0	0.0404854	Inside-AD	notB	notB
606	0002173-57-1	CC(COc1ccc2c(c1)cccc2)C	2.83085	notB	3.40851	5.95842	9.23	2.17552	Inside-AD	B	B
607	0002212-67-1	CCSC(=O)N1CCCCCC1	1.54187	notB	3.31471	5.50939	45.61	4.57146	Inside-AD	notB	notB
608	0002216-69-5	COc1cccc2c1cccc2	2.32344	notB	2.91779	5.80212	9.23	1.72745	Inside-AD	B	B
609	0002219-82-1	Cc1cccc(c1O)C(C)(C)C	1.915	notB	3.20757	5.81413	20.23	3.73317	Inside-AD	notB	notB
610	0002234-13-1	Clc1c(Cl)c(Cl)c(c2c1c(Cl)c(c(c2Cl)Cl)Cl)Cl	2.77793	notB	1.83659	6.44095	0	0.208862	Inside-AD	B	B
611	0002243-62-1	Nc1cccc2c1cccc2N	1.60255	notB	2.84535	5.86079	52.04	1.76954	Inside-AD	notB	B
612	0002255-17-6	COP(=O)(Oc1ccc(c(c1)C)N(=O)=O)OC	0.889507	notB	3.85731	6.10256	97.71	4.77311	Inside-AD	notB	notB
613	0002310-17-0	CCOP(=S)(SCn1c(=O)oc2c1ccc(c2)Cl)OCC	2.38	notB	4.16257	6.40192	105.97	5.08508	Inside-AD	notB	notB
614	0002381-21-7	Cc1ccc2c3c1ccc1c3c(cc2)ccc1	2.73	notB	2.79968	6.45362	0	0.249444	Inside-AD	B	B
615	0002387-23-7	O=C(NC1CCCCC1)NC1CCCCC1	0.095	notB	2.37322	5.92693	41.13	4.75727	Inside-AD	notB	notB
616	0002403-88-5	OC1CC(C)(C)NC(C1)(C)C	0.26	notB	2.80624	5.80814	32.26	3.54042	Inside-AD	notB	notB
617	0002409-55-4	Cc1ccc(c(c1)C(C)(C)C)O	2.29333	notB	3.279	5.80212	20.23	3.57058	Inside-AD	notB	notB
618	0002436-93-3	Cc1cc2cccnc2c(c1)C	1.2925	notB	3.41444	5.84932	12.89	1.32185	Inside-AD	B	notB
619	0002460-49-3	COc1cc(Cl)c(cc1O)Cl	2.008	notB	3.33718	5.62402	29.46	3.33514	Inside-AD	notB	notB
620	0002463-84-5	COP(=S)(Oc1ccc(cc1Cl)N(=O)=O)OC	2.09609	notB	3.69026	6.09807	112.73	3.61891	Inside-AD	notB	notB
621	0002465-27-2	CN(c1ccc(cc1)C(=N)c1ccc(cc1)N(C)C)C	0.905988	notB	2.99122	6.29342	30.33	3.29921	Inside-AD	B	notB
622	0002498-66-0	O=C1c2ccccc2C(=O)c2c1ccc1c2cccc1	2.41187	notB	2.72409	6.57508	34.14	5.71528	Inside-AD	B	notB
623	0002528-38-3	CCCCCOP(=O)(OCCCCC)OCCCCC	2.48	notB	2.9425	5.87774	54.57	5.55943	Inside-AD	notB	notB
624	0002539-17-5	COc1c(O)c(Cl)c(c(c1Cl)Cl)Cl	2.51294	notB	3.10188	5.92693	29.46	3.87007	Inside-AD	notB	notB
625	0002539-26-6	COc1c(O)c(OC)c(c(c1Cl)Cl)Cl	1.78	notB	3.04638	5.99396	38.69	3.89543	Inside-AD	notB	notB
626	0002580-78-1	Nc1c2C(=O)c3ccccc3C(=O)c2c(cc1S(=O)(=O)O)Nc1cccc(c1)S(=O)(=O)CCOS(=O)(=O)O	0.595	notB	4.74871	7.15227	249.44	6.38712	Outside-AD	notB	notB
627	0002581-34-2	Oc1ccc(c(c1)C)N(=O)=O	2.54113	notB	3.6416	5.60947	63.37	3.25698	Inside-AD	notB	notB
628	0002611-82-7	O=C1C=Cc2c(C1=NNc1ccc(c3c1cccc3)S(=O)(=O)O)c(cc(c2)S(=O)(=O)O)S(=O)(=O)O	0.245	notB	4.35401	7.08924	229.71	5.60605	Outside-AD	notB	notB
629	0002636-26-2	COP(=S)(Oc1ccc(cc1)C#N)OC	0.771155	notB	3.38347	5.8999	93.38	2.63655	Inside-AD	notB	notB
630	0002642-71-9	CCOP(=S)(SCn1nnc2c(c1=O)cccc2)OCC	2.27	notB	4.08757	6.35784	127.45	5.4144	Inside-AD	notB	notB
631	0002668-24-8	COc1cc(Cl)c(c(c1O)Cl)Cl	2.18315	notB	3.41042	5.78383	29.46	3.66307	Inside-AD	notB	notB
632	0002695-37-6	C=Cc1ccc(cc1)S(=O)(=O)O	0.105	notB	3.52193	5.72031	62.75	3.71037	Inside-AD	notB	notB
633	0002795-39-3	FC(C(C(C(C(S(=O)(=O)O)(F)F)(F)F)(F)F)(F)F)(C(C(C(F)(F)F)(F)F)(F)F)F	3.28	notB	2.91441	7.02019	62.75	5.0536	Inside-AD	B	notB
634	0002855-13-2	NCC1(C)CC(N)CC(C1)(C)C	0.005	notB	3.2994	5.88332	52.04	2.00597	Inside-AD	notB	notB
635	0002885-00-9	CCCCCCCCCCCCCCCCCCS	0.785	notB	1.97223	5.58725	38.8	0.297533	Inside-AD	B	B
636	0002921-88-2	CCOP(=S)(Oc1nc(Cl)c(cc1Cl)Cl)OCC	2.78245	notB	3.77144	6.1506	82.48	2.69184	Inside-AD	notB	notB
637	0003048-65-5	C1=CCC2C(C1)C=CC2	2.49	notB	2.95114	5.50939	0	0.383102	Inside-AD	B	B
638	0003089-11-0	COCN(c1nc(nc(n1)N(COC)COC)N(COC)COC)COC	0.24	notB	2.69478	6.44731	103.77	1.7212	Inside-AD	B	notB
639	0003209-22-1	O=N(=O)c1cccc(c1Cl)Cl	1.98628	notB	3.18201	5.62402	43.14	3.42389	Inside-AD	notB	notB
640	0003214-47-9	O=C(Nc1ccc(c(c1)C)N=Nc1cc2c(c(c1)S(=O)(=O)O)cccc2S(=O)(=O)O)Nc1ccc(c(c1)C)N=Nc1cc2c(c(c1)S(=O)(=O)O)cccc2S(=O)(=O)O	0.2	notB	4.31569	7.55119	341.57	5.87865	Outside-AD	notB	notB
641	0003229-00-3	BrCC(CBr)(CBr)CBr	2.22456	notB	1.73452	5.1985	0	0.252894	Inside-AD	B	B
642	0003268-87-9	Clc1c2Oc3c(Oc2c(c(c1Cl)Cl)Cl)c(Cl)c(c(c3Cl)Cl)Cl	2.693	notB	2.1867	6.67582	18.46	3.07015	Inside-AD	B	B
643	0003279-07-0	O=N(=O)c1cc(ccc1O)C(C)(C)C	1.76	notB	3.34603	5.95842	63.37	3.54649	Inside-AD	notB	notB
644	0003296-90-0	OCC(CBr)(CBr)CO	0.312231	notB	2.87951	5.1985	40.46	2.89134	Inside-AD	notB	notB
645	0003319-31-1	CCCCC(COC(=O)c1cc(ccc1C(=O)OCC(CCCC)CC)C(=O)OCC(CCCC)CC)CC	0.25	notB	3.54538	6.77878	78.9	6.22315	Inside-AD	notB	notB
646	0003380-34-5	Clc1ccc(c(c1)O)Oc1ccc(cc1Cl)Cl	2.39023	notB	3.37581	6.14204	29.46	3.82075	Inside-AD	notB	notB
647	0003389-71-7	ClC1=C(Cl)C2(C(C1(Cl)C=C2)(Cl)Cl)Cl	2.78539	notB	2.97356	6.36819	0	0.674492	Inside-AD	B	B
648	0003407-42-9	OC1CCCC(C1)C1CC2CC1C(C2(C)C)C	2.76	notB	3.37722	6.42811	20.23	3.87868	Inside-AD	B	notB
649	0003531-19-9	O=N(=O)c1cc(Cl)c(c(c1)N(=O)=O)N	1.04	notB	3.46132	5.92693	112.3	3.46993	Inside-AD	notB	notB
650	0003576-88-3	Nc1nc(Nc2nc(N)nc(n2)N)nc(n1)N	-1	notB	2.48853	6.1334	193.45	1.38812	Outside-AD	notB	notB
651	0003586-14-9	Cc1cccc(c1)Oc1ccccc1	3.27	notB	2.85278	5.83773	9.23	2.15917	Inside-AD	B	B
652	0003618-60-8	Clc1cc(NN=C2C=Cc3c(C2=O)cccc3O)c(c(c1)S(=O)(=O)O)O	0.649903	notB	4.62541	6.71538	144.67	5.45213	Inside-AD	notB	notB
653	0003622-84-2	CCCCNS(=O)(=O)c1ccccc1	0.54	notB	3.64697	5.78383	54.55	4.74403	Inside-AD	notB	notB
654	0003648-21-3	CCCCCCCOC(=O)c1ccccc1C(=O)OCCCCCCC	1.36429	notB	3.34926	6.286	52.6	5.27702	Inside-AD	notB	notB
655	0003674-75-7	CCc1cc2ccccc2c2c1cccc2	2.15489	notB	3.13075	6.23637	0	0.31713	Inside-AD	B	B
656	0003761-41-9	COP(=S)(Oc1ccc(c(c1)C)S(=O)C)OC	0.432588	notB	3.94455	6.10256	105.87	4.61687	Inside-AD	notB	notB
657	0003766-81-2	CCC(c1ccccc1OC(=O)NC)C	1.27364	notB	3.99173	5.86079	38.33	4.11103	Inside-AD	notB	notB
658	0003772-94-9	CCCCCCCCCCCC(=O)Oc1c(Cl)c(Cl)c(c(c1Cl)Cl)Cl	2.325	notB	3.08851	6.38182	26.3	5.28259	Inside-AD	notB	notB
659	0003848-51-9	O=P(Oc1ccccc1)(Oc1ccccc1)Nc1ccccc1	1.86	notB	2.69226	6.42162	57.37	6.2893	Inside-AD	notB	notB
660	0003864-99-1	Clc1ccc2c(c1)nn(n2)c1cc(cc(c1O)C(C)(C)C)C(C)(C)C	3.23345	notB	3.40699	6.7417	50.42	4.95502	Inside-AD	notB	notB
661	0003871-99-6	FC(C(C(C(C(C(S(=O)(=O)O)(F)F)(F)F)(F)F)(F)F)(F)F)(F)F	2.016	notB	3.13684	6.7511	62.75	4.7194	Inside-AD	B	notB
662	0003891-29-0	CCCCCCCCCCCCCCCCCCNC(=O)N1CC1	1.455	notB	2.47519	6.0845	32.11	4.38051	Inside-AD	notB	notB
663	0003965-55-7	COC(=O)c1cc(cc(c1)S(=O)(=O)O)C(=O)OC	-0.02	notB	3.58362	6.18415	115.35	4.32142	Inside-AD	notB	notB
664	0004101-68-2	BrCCCCCCCCCCBr	1.58261	notB	2.07782	5.04343	0	0.112393	Inside-AD	B	notB
665	0004162-45-2	OCCOc1c(Br)cc(cc1Br)C(c1cc(Br)c(c(c1)Br)OCCO)(C)C	2.0475	notB	3.69268	6.66568	58.92	3.07039	Inside-AD	B	B
666	0004175-54-6	CC1CCC(c2c1cccc2)C	3.12	notB	3.18201	5.86079	0	0.338009	Inside-AD	B	B
667	0004292-75-5	CCCCCCC1CCCCC1	3.29	notB	2.07387	5.39816	0	0.292271	Inside-AD	B	B
668	0004620-70-6	OCCNC(C)(C)C	0.295	notB	2.90251	4.93447	32.26	2.36708	Inside-AD	notB	notB
669	0004637-24-5	COC(N(C)C)OC	-0.12	notB	2.62948	4.89035	21.7	1.36458	Inside-AD	notB	notB
670	0004883-72-1	O=NN(C1CCCCC1)O	0.947554	notB	2.64242	5.36129	52.9	2.83685	Inside-AD	notB	notB
671	0004901-51-3	Clc1c(O)cc(c(c1Cl)Cl)Cl	1.46076	notB	2.77736	5.70711	20.23	3.51679	Inside-AD	notB	notB
672	0004979-32-2	C1CCC(CC1)N(C1CCCCC1)Sc1nc2c(s1)cccc2	2.45333	notB	3.04434	6.52649	69.67	2.14538	Inside-AD	B	B
673	0005102-83-0	Cc1ccc(c(c1)C)NC(=O)C(=NNc1ccc(cc1Cl)c1ccc(c(c1)Cl)NN=C(C(=O)Nc1ccc(cc1C)C)C(=O)C)C(=O)C	0.49	notB	4.11867	7.21744	141.12	5.90468	Inside-AD	notB	notB
674	0005124-25-4	O=N(=O)c1cc(ccc1Nc1ccccc1)S(=O)(=O)Nc1ccccc1	1.55001	notB	3.47401	6.608	109.72	5.64005	Inside-AD	notB	notB
675	0005428-54-6	O=N(=O)c1ccc(c(c1)O)C	1.28598	notB	3.6416	5.59471	63.37	3.15889	Inside-AD	notB	notB
676	0005468-75-7	CC(=O)C(=NNc1ccc(cc1Cl)c1ccc(c(c1)Cl)NN=C(C(=O)Nc1ccccc1C)C(=O)C)C(=O)Nc1ccccc1C	0.32	notB	4.14487	7.16007	141.12	5.80961	Inside-AD	notB	notB
677	0005510-99-6	CCC(c1cccc(c1O)C(CC)C)C	2.82045	notB	3.32366	5.94803	20.23	4.19185	Inside-AD	notB	notB
678	0005566-34-7	ClC1=C(Cl)C2(C(C1(Cl)C1C2CC(C1)(Cl)Cl)(Cl)Cl)Cl	2.21815	notB	3.33496	6.78106	0	0.517975	Inside-AD	B	B
679	0005567-15-7	COc1cc(Cl)c(cc1NC(=O)C(C(=O)C)N=Nc1ccc(cc1Cl)c1ccc(c(c1)Cl)N=NC(C(=O)Nc1cc(OC)c(cc1OC)Cl)C(=O)C)OC	0.49	notB	4.49896	7.34148	178.7	6.17548	Outside-AD	notB	notB
680	0005707-44-8	CCc1ccc(cc1)c1ccccc1	2.98	notB	2.94882	5.86647	0	0.196759	Inside-AD	B	B
681	0005786-21-0	CN1CCN(CC1)C1=Nc2cc(Cl)ccc2Nc2c1cccc2	2.915	notB	3.98372	6.59715	30.87	2.07774	Inside-AD	B	notB
682	0005809-23-4	CCN(c1ccc(c(c1)O)C(=O)c1ccccc1C(=O)O)CC	0.195	notB	4.01336	6.46925	77.84	5.57571	Inside-AD	notB	notB
683	0005835-26-7	C=CC1(C)CCC2C(=CCC3C2(C)CCCC3(C)C(=O)O)C1	1.63963	notB	4.16681	6.71052	37.3	4.94872	Inside-AD	notB	notB
684	0005915-41-3	CCNc1nc(Cl)nc(n1)NC(C)(C)C	0.8225	notB	3.15502	5.92693	62.73	1.30082	Inside-AD	notB	B
685	0006034-54-4	CC(=O)Nc1ccc(cc1)S(=O)(=O)O	0.105	notB	3.70813	5.87212	91.85	3.78273	Inside-AD	notB	notB
686	0006099-57-6	Oc1ccc(c2c1cccc2)S(=O)(=O)O	0.71	notB	3.58835	6.15486	82.98	4.18023	Inside-AD	notB	notB
687	0006165-51-1	Cc1ccc(c(c1)C(c1ccccc1)C)C	2.9325	notB	3.35159	6.07535	0	0.298611	Inside-AD	B	B
688	0006337-43-5	CCOC(=O)C(=Cc1ccc(cc1)C=C(C(=O)OCC)C(=O)OCC)C(=O)OCC	1.28	notB	3.46772	6.5582	105.2	5.04568	Inside-AD	notB	notB
689	0006358-37-8	Cc1ccc(cc1)NC(=O)C(C(=O)C)N=Nc1ccc(cc1Cl)c1ccc(c(c1)Cl)N=NC(C(=O)Nc1ccc(cc1)C)C(=O)C	0.49	notB	4.16474	7.1507	141.78	5.75608	Inside-AD	notB	notB
690	0006358-85-6	CC(=O)C(=NNc1ccc(cc1Cl)c1ccc(c(c1)Cl)NN=C(C(=O)Nc1ccccc1)C(=O)C)C(=O)Nc1ccccc1	0.576667	notB	3.94329	7.09257	141.12	5.64522	Inside-AD	notB	notB
691	0006425-39-4	O(CCN1CCOCC1)CCN1CCOCC1	0.48	notB	2.33771	5.90536	34.17	2.17417	Inside-AD	B	notB
692	0006864-37-5	NC1CCC(CC1C)CC1CCC(C(C1)C)N	1.28	notB	3.30847	6.1334	52.04	2.09735	Inside-AD	notB	B
693	0007085-19-0	OC(=O)C(Oc1ccc(cc1C)Cl)C	0.48	notB	4.07327	5.826	46.53	3.56496	Inside-AD	notB	notB
694	0007287-19-6	CSc1nc(NC(C)C)nc(n1)NC(C)C	1.93	notB	3.19287	5.93225	88.03	1.42065	Inside-AD	notB	notB
695	0007379-51-3	CSc1c(C)cc(cc1C)O	1.16	notB	3.29466	5.63835	45.53	3.23752	Inside-AD	notB	notB
696	0007529-22-8	CN1(=O)CCOCC1	1	notB	2.94504	5.24175	26.3	3.98028	Inside-AD	notB	notB
697	0007580-85-0	OCCOC(C)(C)C	-0.22	notB	2.58288	4.93447	29.46	2.30458	Inside-AD	notB	notB
698	0010075-50-0	Brc1ccc2c(c1)cc[nH]2	2.98	notB	3.375	5.65249	15.79	0.672737	Inside-AD	notB	notB
699	0010081-67-1	CC(c1ccccc1)(c1ccc(cc1)Nc1ccc(cc1)C(c1ccccc1)(C)C)C	1.925	notB	2.96084	6.85961	12.03	1.04077	Inside-AD	B	B
700	0010113-28-7	COP(=O)(Oc1ccccc1)OC	2.76	notB	3.00687	5.72685	54.57	4.57689	Inside-AD	notB	notB
701	0010161-33-8	O=C1CCC2=C3C=CC4(C(C3CCC2=C1)CCC4O)C	1.11	notB	4.44531	6.632	37.3	4.60452	Inside-AD	notB	notB
702	0010315-98-7	CC(CN1CCOCC1)C	1.36534	notB	3.0875	5.32301	12.47	1.7396	Inside-AD	notB	notB
703	0010319-14-9	Oc1c(nc2c(c1Br)cccc2)C1C(=O)c2c(C1=O)cccc2	0.992988	notB	3.74879	6.70808	67.26	5.65434	Inside-AD	notB	notB
704	0010461-98-0	N#CC(=C1CCCCC1)c1ccccc1	2.5	notB	3.37775	5.93754	23.79	3.22384	Inside-AD	notB	notB
705	0010496-18-1	CCCCCCCCCCSSCCCCCCCCCC	2	notB	2.30423	5.75257	50.6	0.312171	Inside-AD	B	B
706	0010541-83-0	CNc1ccc(cc1)C(=O)O	1.14241	notB	3.48418	5.51745	49.33	3.38015	Inside-AD	notB	notB
707	0010605-21-7	COC(=O)Nc1nc2c([nH]1)cccc2	0.664545	notB	3.79509	5.93754	67.01	3.86468	Inside-AD	notB	notB
708	0012002-48-1	Clc1c(Cl)cccc1Cl	2.94659	notB	2.12581	5.37064	0	0.280974	Inside-AD	B	B
709	0012122-67-7	SC(=S)NCCNC(=S)S	2.21	notB	2.9477	5.01728	165.84	0.943999	Outside-AD	notB	notB
710	0012217-77-5	Oc1ccc(c2c1C(=O)c1c(C2=O)c(ccc1O)N(=O)=O)Nc1ccccc1	2.31855	notB	3.88982	6.8638	129.77	6.17539	Inside-AD	notB	notB
711	0013071-79-9	CCOP(=S)(SCSC(C)(C)C)OCC	2.14167	notB	2.96553	5.78383	110.96	2.60387	Inside-AD	notB	notB
712	0013194-48-4	CCCSP(=O)(SCCC)OCC	0.896	notB	3.29596	5.50126	86.71	5.42151	Inside-AD	notB	notB
713	0013286-32-3	CCOP(=O)(OCC)SCc1ccccc1	1.03667	notB	3.53305	5.88332	70.64	5.36017	Inside-AD	notB	notB
714	0013464-24-9	Oc1ccc(cc1)C(=C)CC(c1ccc(cc1)O)(C)C	1.59	notB	3.73418	6.32257	40.46	3.36705	Inside-AD	notB	notB
715	0013475-82-6	CC(CC(C)(C)C)CC(C)(C)C	3.1269	notB	2.09665	5.63121	0	0.371528	Inside-AD	B	B
716	0013560-89-9	ClC1=C(Cl)C2(C(C1(Cl)C1C2CCC2C(CC1)C1(Cl)C(=C(C2(C1(Cl)Cl)Cl)Cl)Cl)(Cl)Cl)Cl	1.57	notB	3.24946	7.33237	0	0.556435	Inside-AD	B	B
717	0013674-84-5	ClCC(OP(=O)(OC(CCl)C)OC(CCl)C)C	0.519273	notB	2.88447	5.92693	54.57	5.63243	Inside-AD	notB	notB
718	0013674-87-8	ClCC(OP(=O)(OC(CCl)CCl)OC(CCl)CCl)CCl	1.22036	notB	2.60632	6.08904	54.57	6.16362	Inside-AD	notB	notB
719	0013936-21-5	CCCCCc1ccc2c(c1)C(=O)c1c(C2=O)cccc1	2.96527	notB	3.72973	6.47235	34.14	5.58349	Inside-AD	notB	notB
720	0015046-75-0	Cc1ccccc1S(=O)(=O)O	-0.17	notB	3.36609	5.68017	62.75	3.75741	Inside-AD	notB	notB
721	0015087-24-8	O=C1C(=Cc2ccccc2)C2C(C1(C)CC2)(C)C	2.44857	notB	3.75072	6.52062	17.07	5.64042	Inside-AD	notB	B
722	0015258-73-8	OCc1c(Cl)cccc1Cl	1.21915	notB	3.20282	5.4848	20.23	2.9516	Inside-AD	notB	notB
723	0015782-05-5	OC(=O)c1cc2ccccc2c(c1O)N=Nc1cc(Cl)c(cc1S(=O)(=O)O)C	0.3	notB	4.51837	6.78784	145	4.83959	Inside-AD	notB	notB
[truncated: 239 more rows]

[truncated: 1 more sheets: Table S11]
